# Supplementary material for: An Integrated Approach for the Efficient Extraction and Solubilization of Rice Microsomal Membrane Proteins for High-Throughput Proteomics
Source: Front Plant Sci. 2021 Sep 9;12:723369. doi: 10.3389/fpls.2021.723369 (PMC8460067; doi:10.3389/fpls.2021.723369)
Supplement: Supplementary Table 1 — Identification of 2,384 proteins by label-free quantitative analysis using microsomal proteins extracted by two different methods in rice leaves. [file Data_Sheet_2.xlsx]

## Sheet: Table S1
Table S1. Identification of 2,384 proteins by label-free quantitative analysis using microsomal proteins extracted by two different methods in rice leaves
Protein Accession No	Uniprot Accession No	Protein name	Raw values						Missing value imputated values						Unique peptides	Sequence coverage [%]	Mol. weight [kDa]	Q-value	Score	MS/MS count
			PME rep_1	PME rep_2	PME rep_3	MME rep_1	MME rep_2	MME rep_3	PME rep_1	PME rep_2	PME rep_3	MME rep_1	MME rep_2	MME rep_3
LOC_Os01g01080.1	Q52RG7	decarboxylase	25.8824	26.0074	26.5792	27.5707	28.1645	27.0716	25.8824	26.0074	26.5792	27.5707	28.1645	27.0716	2	5.6	58.271	0	5.0279	11
LOC_Os01g01120.1	Q7F2F8	enolase-phosphatase E1	25.3588	25.3666	25.3581	25.679	25.8513	25.8084	25.3588	25.3666	25.3581	25.679	25.8513	25.8084	3	6.5	33.825	0	7.1807	9
LOC_Os01g01302.1	Q0JRG4	shikimate kinase	28.0865	28.1584	28.0906	27.8551	28.3335	27.9663	28.0865	28.1584	28.0906	27.8551	28.3335	27.9663	5	25.3	29.617	0	70.826	23
LOC_Os01g01307.1	B7ENG6	translocon-associated beta domain containing protein	29.7396	29.6971	29.7359	30.1581	30.068	30.018	29.7396	29.6971	29.7359	30.1581	30.068	30.018	5	33.7	20.402	0	33.963	35
LOC_Os01g01420.3	Q658D5	expressed protein;LOC_Os01g01420.1 LOC_Os01g01420.1	25.0937	25.0034	25.3091	NaN	24.5681	24.7859	25.0937	25.0034	25.3091	24.486	24.5681	24.7859	2	7.4	39.787	0	13.857	7
LOC_Os01g01450.2	Q9FTY4	stress responsive protein	28.5018	28.6726	28.589	30.4356	30.2008	30.5494	28.5018	28.6726	28.589	30.4356	30.2008	30.5494	5	35.8	30.146	0	95.05	47
LOC_Os01g01640.1	Q657Y8	Rer1 protein	26.6923	26.9055	26.8342	27.3796	27.5433	27.6392	26.6923	26.9055	26.8342	27.3796	27.5433	27.6392	2	18.4	21.768	0	11.012	18
LOC_Os01g01710.1	Q8W250	1-deoxy-D-xylulose 5-phosphate reductoisomerase	26.1801	26.3974	26.768	25.896	26.2855	26.0856	26.1801	26.3974	26.768	25.896	26.2855	26.0856	7	17.3	51.473	0	20.665	18
LOC_Os01g01960.1	Q0JRB9	transcriptional repressor	24.6155	24.6019	24.6056	25.7637	25.5241	25.6154	24.6155	24.6019	24.6056	25.7637	25.5241	25.6154	4	4.5	149.43	0	9.7588	9
LOC_Os01g02020.3	Q9ASK5	acetyl-CoA acetyltransferase	25.214	25.2025	25.2289	27.5489	27.5399	27.472	25.214	25.2025	25.2289	27.5489	27.5399	27.472	5	22.6	38.341	0	17.417	15
LOC_Os01g02080.1	Q657T1	peptidyl-prolyl cis-trans isomerase	30.2332	30.2443	30.3262	29.2826	29.309	29.3429	30.2332	30.2443	30.3262	29.2826	29.309	29.3429	8	44.7	31.411	0	150.2	36
LOC_Os01g03040.1	Q9LGP4	expressed protein	29.2408	29.2291	29.2574	26.9915	27.097	27.0049	29.2408	29.2291	29.2574	26.9915	27.097	27.0049	7	38.2	27.538	0	65.237	25
LOC_Os01g03070.2	Q5ZEN1	transposon protein	29.5803	29.7403	29.6198	28.8036	28.8057	28.8602	29.5803	29.7403	29.6198	28.8036	28.8057	28.8602	16	20.6	113.64	0	131.38	58
LOC_Os01g03144.1	Q9ARU4	white-brown complex homolog 7	29.2501	29.2019	29.083	28.9168	28.9687	29.1545	29.2501	29.2019	29.083	28.9168	28.9687	29.1545	13	22.5	73.368	0	113.28	51
LOC_Os01g03650.1	Q5ZDZ8	sufB/sufD domain containing protein	25.0134	NaN	NaN	26.121	26.4098	25.9941	25.0134	23.0725	23.4791	26.121	26.4098	25.9941	3	8.3	51.614	0	5.1992	6
LOC_Os01g03760.2	Q9LGA3	expressed protein;LOC_Os01g03760.1 LOC_Os01g03760.1	27.5943	27.983	27.8925	28.2489	27.951	28.1112	27.5943	27.983	27.8925	28.2489	27.951	28.1112	8	18.3	55.317	0	30.374	21
LOC_Os01g04190.4	Q0JQX6	transporter family protein	27.0831	27.1453	27.0456	27.1556	27.3109	27.1776	27.0831	27.1453	27.0456	27.1556	27.3109	27.1776	3	7.5	41.409	0	5.9476	15
LOC_Os01g04330.1	Q5ZCK5	OsCML16 - Calmodulin-related calcium sensor protein	NaN	NaN	NaN	26.8202	26.7073	26.9384	24.5944	23.4624	24.0779	26.8202	26.7073	26.9384	3	26	19.263	0	6.7923	6
LOC_Os01g04630.1	Q5ZC51	muconate cycloisomerase	25.2015	25.266	25.1411	NaN	NaN	24.9482	25.2015	25.266	25.1411	23.7168	23.1873	24.9482	3	13.5	46.63	0	11.702	7
LOC_Os01g04814.4	Q8LKV4	vacuolar sorting-associating 4B	26.5525	26.1843	26.1223	26.6748	26.9986	26.5483	26.5525	26.1843	26.1223	26.6748	26.9986	26.5483	7	21.8	44.171	0	16.068	15
LOC_Os01g04900.2	Q0JQS5	peptidase M50 family protein	28.3449	28.4387	29.5033	NaN	26.454	NaN	28.3449	28.4387	29.5033	23.6439	26.454	24.1334	3	7.1	52.297	0	32.221	8
LOC_Os01g04950.3	Q9FU86	peptide transporter PTR2	25.3627	25.2264	25.237	27.263	27.5885	27.4139	25.3627	25.2264	25.237	27.263	27.5885	27.4139	6	10.2	63.097	0	14.002	18
LOC_Os01g05490.1	P48494	triosephosphate isomerase	27.1386	26.8846	27.174	NaN	NaN	NaN	27.1386	26.8846	27.174	23.9932	22.865	25.4038	4	33.6	27.063	0	7.1653	7
LOC_Os01g62230.1	Q943L2	Core histone H2A/H2B/H3/H4 domain containing protein	32.0482	32.0453	32.122	30.1627	30.2591	29.9414	32.0482	32.0453	32.122	30.1627	30.2591	29.9414	2	17.3	15.366	0	19.582	41
LOC_Os01g05670.1	Q5ZED1	3-oxo-5-alpha-steroid 4-dehydrogenase	28.0663	27.7887	27.7119	28.2424	28.0348	28.137	28.0663	27.7887	27.7119	28.2424	28.0348	28.137	4	11.9	35.808	0	9.4668	15
LOC_Os01g05800.2	Q5ZEK1	inner membrane protein	27.3022	27.4068	27.3885	NaN	NaN	24.7084	27.3022	27.4068	27.3885	24.7831	22.4376	24.7084	3	8.1	48.838	0	67.223	11
LOC_Os01g06020.1	Q0JQL0	aspartyl-tRNA synthetase	25.5344	25.6155	25.2796	25.23	25.0708	25.2798	25.5344	25.6155	25.2796	25.23	25.0708	25.2798	3	9.9	42.862	0	8.5043	10
LOC_Os01g06290.4	Q5ZCD9	splicing factor	25.9455	25.7241	25.5241	NaN	25.3696	25.0926	25.9455	25.7241	25.5241	23.232	25.3696	25.0926	3	8.2	24.339	0	5.683	6
LOC_Os01g06600.2	Q5ZEL4	glutaryl-CoA dehydrogenase	23.8774	23.8098	NaN	24.7883	24.9876	24.5343	23.8774	23.8098	23.2055	24.7883	24.9876	24.5343	2	10	39.975	0.0042678	1.9408	4
LOC_Os01g06740.1	Q9LGK6	ribosome inactivating protein	NaN	NaN	NaN	25.8079	25.8841	25.8721	23.8594	23.2103	22.732	25.8079	25.8841	25.8721	2	8.2	30.477	0	6.7524	6
LOC_Os01g07100.1	B9ET10	expressed protein	25.5685	25.3488	25.3651	26.0299	26.1084	26.0879	25.5685	25.3488	25.3651	26.0299	26.1084	26.0879	6	20.1	38.472	0	7.7893	9
LOC_Os01g07382.1	Q9AS74	expressed protein	27.8195	27.8876	27.761	28.4289	28.3732	28.6681	27.8195	27.8876	27.761	28.4289	28.3732	28.6681	4	15.5	41.936	0	17.313	24
LOC_Os01g07530.1	Q5VQG4	uncharacterized glycosyltransferase	26.1891	26.2518	25.7423	27.8567	28.4397	27.8698	26.1891	26.2518	25.7423	27.8567	28.4397	27.8698	8	15.7	91.911	0	19.411	20
LOC_Os01g07760.2	Q43007	phospholipase D	28.5523	28.5021	28.4299	31.6038	31.8261	31.8458	28.5523	28.5021	28.4299	31.6038	31.8261	31.8458	25	42.5	92.218	0	161.12	95
LOC_Os01g07780.1	Q94E65	embryo-specific 3	NaN	NaN	26.5975	28.5829	28.6634	29.5571	22.8686	22.6923	26.5975	28.5829	28.6634	29.5571	3	26.7	20.657	0	39.999	7
LOC_Os01g07810.2	Q94E63	of unknown function domain containing protein	27.4813	27.4745	27.5318	27.2098	27.183	26.9788	27.4813	27.4745	27.5318	27.2098	27.183	26.9788	3	42	14.092	0	43.647	18
LOC_Os01g07870.1	Q0JQA5	ABC transporter family protein	24.9487	NaN	24.9016	26.1508	26.065	25.6894	24.9487	23.5393	24.9016	26.1508	26.065	25.6894	5	4.9	164.73	0	15.871	9
LOC_Os01g07910.1	Q5VR12	NADH-cytochrome b5 reductase	25.6509	NaN	25.9472	26.7638	26.6975	26.6557	25.6509	22.8872	25.9472	26.7638	26.6975	26.6557	5	18.3	33.852	0	7.0042	6
LOC_Os01g08440.1	B7FAP2	UDP-glucoronosyl and UDP-glucosyl transferase domain containing protein	NaN	NaN	NaN	25.1322	25.3886	25.5515	24.6553	21.6129	23.6144	25.1322	25.3886	25.5515	3	8	51.582	0	12.74	6
LOC_Os01g08510.1	Q5VR43	MAR-binding filament-like 1	31.6655	31.6266	31.5562	30.1261	30.2892	30.1652	31.6655	31.6266	31.5562	30.1261	30.2892	30.1652	27	39.9	84.13	0	290.04	129
LOC_Os01g08560.2	Q9AQZ5	DnaK family protein	26.0094	25.889	25.6581	26.6134	26.5979	26.8551	26.0094	25.889	25.6581	26.6134	26.5979	26.8551	2	2.6	93.107	0	6.9612	12
LOC_Os01g08660.1	Q5VR89	aquaporin protein	25.9399	26.2257	26.175	25.7038	25.3623	25.4493	25.9399	26.2257	26.175	25.7038	25.3623	25.4493	2	13.8	26.051	0	10.788	17
LOC_Os01g09010.1	Q9LGQ6	transferase family protein	25.5679	25.5313	25.651	25.5575	25.7102	25.641	25.5679	25.5313	25.651	25.5575	25.7102	25.641	6	20	46.166	0	12.368	9
LOC_Os01g09540.1	Q9LG77	HAD superfamily phosphatase	29.0037	28.975	29.0946	28.4071	28.5565	28.5921	29.0037	28.975	29.0946	28.4071	28.5565	28.5921	8	30.7	32.968	0	113.07	63
LOC_Os01g09560.1	Q5SNJ4	mitochondrial-processing peptidase subunit alpha	31.5384	31.4934	31.5258	31.8245	31.6192	31.8441	31.5384	31.4934	31.5258	31.8245	31.6192	31.8441	17	54.1	53.946	0	236.53	139
LOC_Os01g09880.1	Q5SMX9	harpin-induced 1 domain containing protein	26.2981	26.3893	25.4165	24.6162	24.7785	24.2548	26.2981	26.3893	25.4165	24.6162	24.7785	24.2548	2	7.3	29.784	0	8.399	5
LOC_Os01g10010.2	B7FAB9	prenylated rab acceptor	25.6323	25.7129	25.579	NaN	26.0843	NaN	25.6323	25.7129	25.579	23.9976	26.0843	23.9849	2	15.4	21.178	0	18.127	7
LOC_Os01g10050.2	Q5QMN3	DEAD-box ATP-dependent RNA helicase	24.3333	NaN	NaN	24.885	24.8641	25.3168	24.3333	23.6933	23.4135	24.885	24.8641	25.3168	3	9.7	54.673	0	9.6317	5
LOC_Os01g10280.2	B9ETX7	phosphoribosylaminoimidazole carboxylase	25.1019	25.26	24.6453	25.4227	NaN	25.4729	25.1019	25.26	24.6453	25.4227	23.706	25.4729	4	13.8	68.261	0	15.506	10
LOC_Os06g35730.1	Q0DK10	ribosomal L5	29.0504	29.0694	28.929	30.169	30.0911	29.7851	29.0504	29.0694	28.929	30.169	30.0911	29.7851	1	24.7	20.836	0	29.07	20
LOC_Os01g10950.1	Q8LRJ2	peptide-N4-asparagine amidase A	23.8081	23.9634	23.6741	25.031	25.309	25.1277	23.8081	23.9634	23.6741	25.031	25.309	25.1277	2	5.5	62.612	0	18.279	9
LOC_Os01g11054.1	Q5QNA5	phosphoenolpyruvate carboxylase	26.4758	26.673	27.1545	25.2456	26.1627	25.9321	26.4758	26.673	27.1545	25.2456	26.1627	25.9321	7	14.1	114.2	0	38.272	14
LOC_Os01g11414.2	Q5QNI2	sodium/calcium exchanger protein	26.9627	27.3127	27.078	28.1314	28.1263	28.2599	26.9627	27.3127	27.078	28.1314	28.1263	28.2599	4	10.8	47.283	0	26.38	11
LOC_Os01g11650.2	A0A0P0UZL1	GDSL-like lipase/acylhydrolase	NaN	NaN	NaN	25.9797	25.8963	26.0833	22.2346	24.5744	22.9153	25.9797	25.8963	26.0833	3	14.3	38.083	0	8.052	7
LOC_Os01g11946.1	Q5QNE1	ABC transporter	28.6749	28.458	28.4474	26.7661	27.1503	26.5572	28.6749	28.458	28.4474	26.7661	27.1503	26.5572	13	22.2	85.758	0	122.64	41
LOC_Os01g12650.1	Q9AWY7	reticulon domain containing protein	26.8218	27.1008	26.9438	25.5805	26.3423	25.0515	26.8218	27.1008	26.9438	25.5805	26.3423	25.0515	6	26.9	30.538	0	24.176	19
LOC_Os01g12730.1	Q5N7Z9	ras-related protein	29.8279	29.87	29.9567	30.5091	30.6893	30.6827	29.8279	29.87	29.9567	30.5091	30.6893	30.6827	3	54.6	23.137	0	52.07	54
LOC_Os01g12740.1	Q8W0B6	cytochrome P450	25.2838	25.5891	25.5933	NaN	NaN	24.5077	25.2838	25.5891	25.5933	23.9945	24.2634	24.5077	2	8.1	60.54	0	6.9391	7
LOC_Os01g12770.1	A0A0P0V0F6	cytochrome P450	24.2759	NaN	NaN	24.5339	24.6459	24.5432	24.2759	23.2741	23.6782	24.5339	24.6459	24.5432	1	7	59.73	0	7.1783	5
LOC_Os01g12830.1	Q8W0A4	erythronate-4-phosphate dehydrogenase domain containing protein	24.0765	24.2691	24.1201	24.6821	24.7347	24.2656	24.0765	24.2691	24.1201	24.6821	24.7347	24.2656	2	15.8	34.208	0	8.2173	8
LOC_Os01g13160.1	Q5NB64	expressed protein	NaN	NaN	24.927	26.058	26.0387	25.8825	22.7395	23.6772	24.927	26.058	26.0387	25.8825	4	7.6	74.744	0	12.048	8
LOC_Os01g13200.1	B9EUJ0	abscisic acid insensitive 8	23.5046	23.8927	23.7263	NaN	23.5374	NaN	23.5046	23.8927	23.7263	24.3539	23.5374	25.0753	2	4.1	59.947	0	3.6719	2
LOC_Os01g13210.2	Q0JPA6	salt stress root RS1	33.083	33.0415	33.0028	33.7046	33.4227	33.5383	33.083	33.0415	33.0028	33.7046	33.4227	33.5383	8	54.9	21.801	0	189.3	69
LOC_Os01g13420.1	Q9LDX7	SOUL heme-binding protein	NaN	NaN	25.0298	26.1138	26.4329	26.6395	23.8906	24.3041	25.0298	26.1138	26.4329	26.6395	3	17.8	23.878	0	28.68	10
LOC_Os01g13430.1	Q9LI34	importin-alpha re-exporter	27.6553	27.971	27.0695	26.6641	26.5006	26.2723	27.6553	27.971	27.0695	26.6641	26.5006	26.2723	6	10.8	108.36	0	34.512	24
LOC_Os01g13700.1	Q9FTU2	DNA-binding protein-related	27.5675	27.3179	27.5563	26.6176	26.4929	26.8301	27.5675	27.3179	27.5563	26.6176	26.4929	26.8301	2	19.9	15.181	0	11.484	13
LOC_Os01g13770.3	B9EUL4	DUF250 domain containing protein	28.8514	28.8612	29.0437	28.3931	28.4872	28.436	28.8514	28.8612	29.0437	28.3931	28.4872	28.436	2	7.4	32.661	0	4.3069	11
LOC_Os01g14020.2	Q5NA80	expressed protein;LOC_Os01g14020.1 LOC_Os01g14020.1	NaN	NaN	NaN	24.3777	24.8544	24.7563	22.8438	23.5422	23.6088	24.3777	24.8544	24.7563	2	15.3	18.829	0	4.9918	4
LOC_Os01g14050.2	Q5NA77	C2 domain containing protein	NaN	NaN	NaN	25.3725	25.215	25.2891	22.4643	22.1817	24.6484	25.3725	25.215	25.2891	2	6.3	65.598	0	3.1722	4
LOC_Os01g14820.1	Q0JP16	expressed protein	NaN	25.6606	25.5972	25.769	25.7958	25.7649	21.9612	25.6606	25.5972	25.769	25.7958	25.7649	3	7.1	51.548	0	6.9394	10
LOC_Os01g14950.1	Q0JP03	importin subunit alpha	27.6024	27.7299	27.5906	28.3788	28.2614	28.3436	27.6024	27.7299	27.5906	28.3788	28.2614	28.3436	9	28.1	57.57	0	69.089	30
LOC_Os01g15010.1	Q9SDK4	miro	29.3768	29.4098	29.408	29.3805	29.3578	29.3568	29.3768	29.4098	29.408	29.3805	29.3578	29.3568	3	59.1	21.944	0	97.347	34
LOC_Os01g15020.2	Q5NBT9	lissencephaly type-1-like homology motif	27.6242	27.6139	27.521	27.1721	26.9548	27.0365	27.6242	27.6139	27.521	27.1721	26.9548	27.0365	6	10.7	123.88	0	48.981	23
LOC_Os01g15600.1	A0A0P0V197	PUR ALPHA-1	27.9547	27.7658	28.0723	28.6476	28.6952	28.8991	27.9547	27.7658	28.0723	28.6476	28.6952	28.8991	7	35.1	33.32	0	94.693	27
LOC_Os01g16040.1	Q9LD54	mitochondrial carrier protein	28.3554	28.2713	28.2843	27.7932	27.8387	27.7874	28.3554	28.2713	28.2843	27.7932	27.8387	27.7874	7	23.1	40.761	0	15.477	26
LOC_Os01g16090.1	Q0JNU2	RNA binding protein	26.7187	26.7631	26.0872	NaN	NaN	NaN	26.7187	26.7631	26.0872	23.8474	23.9605	25.1868	4	21.6	49.279	0	25.968	9
LOC_Os05g30800.1	Q60EW3	26S proteasome non-ATPase regulatory subunit 14	26.9935	NaN	26.8164	27.581	27.5391	27.6643	26.9935	23.7663	26.8164	27.581	27.5391	27.6643	4	16.3	34.393	0	9.5271	10
LOC_Os01g16220.1	Q5NBL8	Sad1 / UNC-like C-terminal domain containing protein	25.3016	25.1441	25.1692	26.2942	26.0695	26.2667	25.3016	25.1441	25.1692	26.2942	26.0695	26.2667	5	12.7	48.429	0	20.269	14
LOC_Os01g16330.1	Q9SDB9	OsRhmbd2 - Putative Rhomboid homologue	24.1704	NaN	NaN	25.4865	24.7395	24.9071	24.1704	23.3874	22.8202	25.4865	24.7395	24.9071	4	13.7	31.952	0	9.3754	6
LOC_Os01g16530.1	Q0JNQ7	OsClp1 - Putative Clp protease homologue	26.5216	26.3669	26.1272	27.137	27.8713	28.0877	26.5216	26.3669	26.1272	27.137	27.8713	28.0877	3	12.4	32.259	0	36.178	8
LOC_Os01g16900.2	Q9SDG5	dehydrogenase	27.9056	27.9086	28.2748	29.0583	28.9187	28.9542	27.9056	27.9086	28.2748	29.0583	28.9187	28.9542	5	18.8	39.442	0	32.076	24
LOC_Os01g16910.1	Q5NBN7	outer mitochondrial membrane porin	26.4267	25.7412	26.3253	25.6796	26.4877	26.1898	26.4267	25.7412	26.3253	25.6796	26.4877	26.1898	5	24.3	37.956	0	15.901	14
LOC_Os01g17170.1	Q9SDJ2	magnesium-protoporphyrin IX monomethyl ester cyclase	33.3674	33.3195	33.3957	30.4931	30.388	30.4197	33.3674	33.3195	33.3957	30.4931	30.388	30.4197	19	46.1	47.301	0	323.31	124
LOC_Os01g17430.1	Q0JNK5	coatomer subunit beta-1	27.5139	27.2861	26.7124	27.3662	27.254	27.3019	27.5139	27.2861	26.7124	27.3662	27.254	27.3019	5	22.3	105.22	0	21.341	17
LOC_Os01g18070.1	Q5N7E8	bacterial transferase hexapeptide domain containing protein	29.2877	29.2239	29.3969	29.5769	29.602	29.5386	29.2877	29.2239	29.3969	29.5769	29.602	29.5386	6	31.2	28.469	0	13.357	23
LOC_Os01g18320.1	Q9AR38	protoporphyrinogen oxidase	30.2854	30.4046	30.3635	29.9897	29.9161	29.9747	30.2854	30.4046	30.3635	29.9897	29.9161	29.9747	21	54.1	56.726	0	234.64	86
LOC_Os01g19020.1	Q9FYP0	peroxidase precursor	26.7095	26.6728	26.7826	24.5108	NaN	NaN	26.7095	26.6728	26.7826	24.5108	24.1817	23.0768	5	25.9	37.913	0	13.548	14
LOC_Os01g19450.2	Q93VT8	ATP-citrate synthase subunit 1	26.5108	26.6176	26.6082	27.6956	27.5529	27.7642	26.5108	26.6176	26.6082	27.6956	27.5529	27.7642	5	15.4	60.326	0	22.446	27
LOC_Os01g19470.1	A2ZS73	nodal modulator 1 precursor	27.9135	27.9593	27.7714	28.8286	29.0712	28.8464	27.9135	27.9593	27.7714	28.8286	29.0712	28.8464	12	18	130.64	0	81.642	48
LOC_Os01g19610.1	Q9FP37	plant of unknown function domain containing protein	24.2978	24.2175	24.2041	NaN	23.6127	NaN	24.2978	24.2175	24.2041	23.3042	23.6127	23.9469	3	7	57.524	0	10.928	7
LOC_Os01g21034.1	Q655P5	pectinesterase	25.7895	25.5654	25.6678	25.2322	25.1647	25.0255	25.7895	25.5654	25.6678	25.2322	25.1647	25.0255	3	12.2	46.148	0	20.793	7
LOC_Os01g21160.2	Q655Q2	2-oxo acid dehydrogenases acyltransferase domain containing protein	26.2022	26.2305	26.1868	28.1123	27.8856	27.971	26.2022	26.2305	26.1868	28.1123	27.8856	27.971	6	29.8	49.636	0	25.214	21
LOC_Os01g21320.1	Q75PK7	NAD dependent epimerase/dehydratase family domain containing protein	NaN	NaN	NaN	26.4427	26.2255	26.4575	23.9186	24.9378	24.416	26.4427	26.2255	26.4575	1	27.5	46.445	0	6.986	7
LOC_Os01g21560.1	Q94D81	esterase/lipase/thioesterase family protein	26.9817	27.0818	26.7049	27.0222	27.2548	27.2783	26.9817	27.0818	26.7049	27.0222	27.2548	27.2783	3	10	35.859	0	13.351	14
LOC_Os01g21820.1	Q657P0	pretranslocase subunit secA	30.4223	30.4103	30.298	30.1814	30.209	30.1603	30.4223	30.4103	30.298	30.1814	30.209	30.1603	26	32.4	113.68	0	213.21	135
LOC_Os01g22010.4	A0A0R7VIP9	S-adenosylmethionine synthetase	30.5594	30.86	30.6878	29.3749	29.6354	29.6004	30.5594	30.86	30.6878	29.3749	29.6354	29.6004	3	47.7	42.9	0	137.4	53
LOC_Os01g22520.2	Q9ASP4	dihydrolipoyl dehydrogenase 1	29.7704	29.8051	29.5512	30.1888	30.1086	29.9625	29.7704	29.8051	29.5512	30.1888	30.1086	29.9625	6	42.5	43.278	0	83.389	57
LOC_Os01g22600.1	Q5ZDR4	mitochondrial carrier protein	NaN	NaN	NaN	24.5551	24.3818	24.4175	23.9556	23.6878	22.4599	24.5551	24.3818	24.4175	2	6.7	35.593	0	4.4093	3
LOC_Os01g23380.1	Q943S7	stripe rust resistance Yr10	NaN	NaN	NaN	24.1359	24.0178	24.2712	23.4882	22.2346	23.7847	24.1359	24.0178	24.2712	2	2.2	89.936	0	3.5418	5
LOC_Os01g23610.2	Q94CN9	dihydrolipoyl dehydrogenase	26.3644	26.326	26.3561	NaN	24.1015	23.9835	26.3644	26.326	26.3561	23.8161	24.1015	23.9835	4	9.5	58.757	0	27.922	13
LOC_Os01g23680.1	Q5ZB95	rossmann fold nucleotide-binding involved in DNA uptake	27.9464	27.7294	28.003	27.228	27.1661	27.3313	27.9464	27.7294	28.003	27.228	27.1661	27.3313	5	26.9	31.034	0	15.487	13
LOC_Os01g23740.2	Q942L2	OsPDIL2-2 disulfide isomerase PDIL2-2	26.8808	26.7748	26.858	29.3129	29.3813	29.3453	26.8808	26.7748	26.858	29.3129	29.3813	29.3453	6	25.6	34.435	0	88.728	28
LOC_Os01g24020.1	Q8LQX1	expressed protein	NaN	NaN	NaN	25.3817	25.3143	25.3123	23.7278	23.8793	23.7159	25.3817	25.3143	25.3123	2	23.3	9.5667	0	3.9623	3
LOC_Os01g24680.1	Q94CN1	3-hydroxyacyl-CoA dehydrogenase	27.8081	27.7788	27.8395	27.6802	27.9141	27.7859	27.8081	27.7788	27.8395	27.6802	27.9141	27.7859	10	19.7	79.391	0	37.657	38
LOC_Os01g24690.3	Q94CM9	60S ribosomal L23A	28.6903	28.8273	28.8122	28.3424	28.3847	28.4702	28.6903	28.8273	28.8122	28.3424	28.3847	28.4702	3	22.6	15.511	0	13.025	10
LOC_Os01g24710.4	B7E7K3	jacalin-like lectin domain containing protein	NaN	NaN	NaN	28.7189	28.7793	28.6946	23.274	23.1111	24.4856	28.7189	28.7793	28.6946	2	27	14.329	0	7.3793	10
LOC_Os01g24950.2	Q8S213	exocyst complex component 6	27.2311	27.419	27.2589	28.3268	28.2861	28.3076	27.2311	27.419	27.2589	28.3268	28.2861	28.3076	10	18.9	87.655	0	61.536	37
LOC_Os01g25330.3	Q5ZCR4	SAC9	24.6658	24.6826	24.655	25.6247	26.4362	26.4315	24.6658	24.6826	24.655	25.6247	26.4362	26.4315	3	3.5	117.75	0	5.6994	5
LOC_Os01g25386.1	Q8GU64	multidrug resistance-associated protein	28.5508	28.5117	28.7587	28.8462	28.7995	28.7826	28.5508	28.5117	28.7587	28.8462	28.7995	28.7826	13	15.6	167.64	0	99.379	57
LOC_Os01g25484.2	B9EWP3	ferredoxin--nitrite reductase	29.0186	29.0672	29.0858	28.2426	28.1379	28.2467	29.0186	29.0672	29.0858	28.2426	28.1379	28.2467	11	26.2	66.142	0	127.51	38
LOC_Os01g25600.1	Q5ZBW3	tetratricopeptide repeat domain containing protein	29.576	29.6796	29.8195	27.8252	27.7354	27.9322	29.576	29.6796	29.8195	27.8252	27.7354	27.9322	11	32.5	49.742	0	61.289	40
LOC_Os01g25820.2	Q5ZAJ0	respiratory burst oxidase	27.7964	27.8004	27.9307	27.4597	27.6558	27.581	27.7964	27.8004	27.9307	27.4597	27.6558	27.581	10	15.8	98.879	0	48.637	30
LOC_Os01g25880.1	Q94DR2	dephospho-CoA kinase	27.9971	27.8671	27.6823	28.1666	28.1902	28.1739	27.9971	27.8671	27.6823	28.1666	28.1902	28.1739	8	44.8	25.671	0	40.139	26
LOC_Os01g26920.1	Q5JJM6	expressed protein	24.5387	25.0714	24.3314	23.7379	NaN	23.5352	24.5387	25.0714	24.3314	23.7379	24.4303	23.5352	3	14.7	36.727	0	29.526	7
LOC_Os01g27040.1	Q7G8Y3	chromatin-remodeling complex ATPase chain	NaN	NaN	NaN	24.7996	24.5129	24.8369	23.3277	23.1106	23.5714	24.7996	24.5129	24.8369	2	2.1	127.63	0	7.9636	10
LOC_Os01g27150.1	Q5ZC88	cullin	25.9554	25.7252	25.8167	26.3796	26.924	26.6992	25.9554	25.7252	25.8167	26.3796	26.924	26.6992	6	9.1	86.947	0	13.468	11
LOC_Os01g27520.2	Q93WM3	tRNA synthetases class II domain containing protein	NaN	25.1279	25.1746	26.2469	26.1909	26.1635	22.5091	25.1279	25.1746	26.2469	26.1909	26.1635	4	14.4	48.624	0	19.881	8
LOC_Os01g28540.2	Q5VP08	stress regulated protein	26.578	26.949	25.8265	24.7911	24.6484	24.8742	26.578	26.949	25.8265	24.7911	24.6484	24.8742	5	13.6	36.344	0	17.224	9
LOC_Os01g31610.1	Q943W5	tyrosyl-tRNA synthetase	28.7521	28.8418	28.6949	27.8475	27.7349	27.7764	28.7521	28.8418	28.6949	27.8475	27.7349	27.7764	10	29	54.558	0	85.293	37
LOC_Os01g31690.1	Q943W1	oxygen-evolving enhancer 1	37.0673	37.0471	37.0572	35.2211	35.2274	35.3286	37.0673	37.0471	37.0572	35.2211	35.2274	35.3286	26	62.2	34.861	0	323.31	678
LOC_Os01g32080.1	Q0JMH0	thiamine pyrophosphate enzyme	28.2687	28.2049	28.4503	28.7853	28.7081	28.708	28.2687	28.2049	28.4503	28.7853	28.7081	28.708	8	23.4	60.825	0	22.243	26
LOC_Os01g32660.4	Q5QN75	STE_MEK_ste7_MAP2K.2 - STE kinases include homologs to sterile 7	26.1329	26.0361	26.0955	26.6625	26.6777	26.756	26.1329	26.0361	26.0955	26.6625	26.6777	26.756	5	20.4	36.185	0	14.752	23
LOC_Os01g32730.2	Q8LRH2	tetratricopeptide repeat containing protein	29.85	29.8988	29.9012	28.453	28.4924	28.5088	29.85	29.8988	29.9012	28.453	28.4924	28.5088	6	35.9	25.77	0	28.221	29
LOC_Os01g32750.1	Q8LRG9	TATA binding protein-associated factor	NaN	25.114	25.0751	26.1894	26.275	26.1485	22.9253	25.114	25.0751	26.1894	26.275	26.1485	3	7.6	60.373	0	8.5013	8
LOC_Os01g32780.1	Q94E74	universal stress domain containing protein	NaN	NaN	NaN	28.1216	28.0404	28.1038	23.7035	21.7649	23.1196	28.1216	28.0404	28.1038	1	9.6	17.922	0	4.8835	10
LOC_Os01g32830.1	B7EKF2	expressed protein	25.9216	26.1225	25.9593	NaN	NaN	NaN	25.9216	26.1225	25.9593	23.7524	23.3963	23.2706	1	6	26.369	0	11.512	10
LOC_Os01g32870.2	Q5QMV0	heat shock DnaJ	NaN	NaN	NaN	25.7471	25.6096	25.7487	24.0678	24.4843	23.9226	25.7471	25.6096	25.7487	3	12.9	44.959	0	4.5522	5
LOC_Os01g32980.1	B9EX68	mitochondrial carrier protein	24.8973	25.3279	25.1679	25.1491	24.9514	25.1455	24.8973	25.3279	25.1679	25.1491	24.9514	25.1455	3	11.7	33.907	0	18.312	9
LOC_Os01g34080.1	Q5QL78	armadillo/beta-catenin-like repeat family protein	26.4542	26.3302	26.4005	26.3053	26.5614	26.6577	26.4542	26.3302	26.4005	26.3053	26.5614	26.6577	5	8.7	92.727	0	21.468	13
LOC_Os01g34780.2	Q5JM35	binding protein	25.0077	NaN	25.2933	24.9686	24.4984	24.9811	25.0077	23.3085	25.2933	24.9686	24.4984	24.9811	2	4.9	53.706	0	8.9027	5
LOC_Os01g35050.4	Q5JLH8	early-responsive to dehydration protein-related	24.7529	25.1104	24.8662	24.504	24.6542	24.7398	24.7529	25.1104	24.8662	24.504	24.6542	24.7398	2	3.4	80.599	0	7.4476	8
LOC_Os01g36860.1	Q5JKF2	DEAD-box ATP-dependent RNA helicase 40	27.5735	27.5177	27.6711	26.9547	26.8727	26.6223	27.5735	27.5177	27.6711	26.9547	26.8727	26.6223	4	11.5	87.979	0	28.114	18
LOC_Os01g36920.1	Q5JK84	DEAD-box ATP-dependent RNA helicase	28.9956	29.0145	28.8884	27.8985	27.4057	27.5793	28.9956	29.0145	28.8884	27.8985	27.4057	27.5793	6	17.6	48.566	0	100.04	37
LOC_Os01g36930.1	Q5JK78	ubiquitin carboxyl-terminal hydrolase 6	25.2731	25.3919	25.4131	26.2102	25.7806	25.6845	25.2731	25.3919	25.4131	26.2102	25.7806	25.6845	4	10.8	53.165	0	14.012	10
LOC_Os01g37800.1	P40392	ras-related protein	28.934	28.7836	28.9702	29.6019	29.3729	29.2669	28.934	28.7836	28.9702	29.6019	29.3729	29.2669	3	36.6	22.476	0	7.1204	28
LOC_Os01g37825.1	Q5JKR1	M16 domain containing zinc peptidase	26.7206	26.5431	25.8303	25.6868	26.3074	26.3339	26.7206	26.5431	25.8303	25.6868	26.3074	26.3339	6	8.5	113.94	0	29.313	15
LOC_Os01g37960.1	Q8S9S4	hydrolase	25.5134	NaN	NaN	26.3664	26.859	26.3851	25.5134	23.1277	24.6979	26.3664	26.859	26.3851	5	21.5	47.134	0	25.03	13
LOC_Os01g38229.2	Q657L8	peptidyl-prolyl isomerase	NaN	NaN	NaN	25.2627	25.264	25.1458	24.1998	23.532	23.5892	25.2627	25.264	25.1458	2	3.5	72.873	0	3.9928	3
LOC_Os01g38970.1	B9EXM2	carbamoyl-phosphate synthase large chain	29.1977	29.3088	29.1951	29.8982	29.8547	29.8503	29.1977	29.3088	29.1951	29.8982	29.8547	29.8503	23	27.4	127.77	0	111.86	77
LOC_Os01g39000.2	A2ZUJ9	ZmGR2c	26.2463	26.3761	26.2997	27.4451	27.3693	27.3855	26.2463	26.3761	26.2997	27.4451	27.3693	27.3855	3	13.6	28.642	0	7.2801	12
LOC_Os01g39260.1	Q8LQJ8	OsFtsH5 FtsH protease	26.9629	26.6063	26.9767	27.6435	27.6181	27.6898	26.9629	26.6063	26.9767	27.6435	27.6181	27.6898	10	30.6	77.434	0	87.05	37
LOC_Os01g39310.3	Q0JLS6	SEY1	29.2892	29.4336	29.1617	29.4948	29.2683	29.3622	29.2892	29.4336	29.1617	29.4948	29.2683	29.3622	15	28.5	80.097	0	139.45	61
LOC_Os01g39380.3	Q0JLS4	SCD1	24.4514	24.2034	NaN	25.2175	25.5424	24.7906	24.4514	24.2034	24.4061	25.2175	25.5424	24.7906	3	4.1	130.55	0	27.195	8
LOC_Os01g39960.1	Q8LJ81	lycopene epsilon cyclase	27.4681	27.2373	27.2555	25.5132	26.6294	25.7675	27.4681	27.2373	27.2555	25.5132	26.6294	25.7675	7	16.3	60.136	0	23.239	16
LOC_Os01g40340.3	B9EXR9	SIT4 phosphatase-associated domain containing protein	26.1819	26.6103	26.049	NaN	NaN	NaN	26.1819	26.6103	26.049	24.4793	24.8281	23.4985	2	9.7	52.552	0	6.3848	8
LOC_Os01g40420.1	Q0JLN6	CBS domain containing membrane protein	NaN	24.9878	24.9536	26.3647	26.4337	26.4563	23.6217	24.9878	24.9536	26.3647	26.4337	26.4563	3	8.9	47.873	0	5.6863	6
LOC_Os01g40470.1	Q8RU33	vacuolar ATP synthase subunit d	29.192	29.1663	29.1755	29.933	29.8863	29.9655	29.192	29.1663	29.1755	29.933	29.8863	29.9655	8	27.4	40.784	0	98.551	42
LOC_Os01g40570.1	Q7F4F8	outer mitochondrial membrane porin	29.1963	29.1302	29.0679	30.2728	30.106	30.2681	29.1963	29.1302	29.0679	30.2728	30.106	30.2681	7	41.8	29.891	0	38.203	45
LOC_Os01g40710.1	Q0JLL8	high light inducible protein	30.2598	30.4095	30.2542	28.6552	28.7982	28.6344	30.2598	30.4095	30.2542	28.6552	28.7982	28.6344	5	42.6	19.885	0	78.61	36
LOC_Os01g40990.3	Q5ZD36	expressed protein;LOC_Os01g40990.2 LOC_Os01g40990.2	NaN	24.665	25.4455	25.5339	25.381	25.6684	22.7342	24.665	25.4455	25.5339	25.381	25.6684	5	2.4	272.2	0	7.9213	9
LOC_Os01g41610.2	Q0JLH6	mitochondrial ATP synthase g subunit family protein	26.488	26.6126	26.4776	28.0738	28.1236	28.0355	26.488	26.6126	26.4776	28.0738	28.1236	28.0355	2	7.4	14.009	0	3.0685	6
LOC_Os01g41710.1	I3QD41	chlorophyll A-B binding protein	35.1832	35.3171	35.0391	33.979	33.7382	33.7236	35.1832	35.3171	35.0391	33.979	33.7382	33.7236	2	57.9	27.552	0	239.41	92
LOC_Os01g42010.1	Q5ZDA3	expressed protein	NaN	24.7994	24.8347	25.996	25.9415	26.2614	24.7273	24.7994	24.8347	25.996	25.9415	26.2614	3	14.7	39.915	0	21.211	10
LOC_Os01g42140.1	A0A0P0V505	expressed protein	24.7529	24.7845	24.8974	27.2272	27.2216	26.9825	24.7529	24.7845	24.8974	27.2272	27.2216	26.9825	4	22.3	33.908	0	19.771	14
LOC_Os01g42294.1	Q5ZBN0	inactive receptor kinase At2g26730 precursor	29.4854	29.6811	29.4926	30.0519	30.1258	30.0512	29.4854	29.6811	29.4926	30.0519	30.1258	30.0512	11	23.4	70.665	0	166.1	55
LOC_Os01g42410.1	Q8GU89	pleiotropic drug resistance protein	NaN	NaN	NaN	26.7737	26.5692	26.8066	23.5813	23.5731	23.2178	26.7737	26.5692	26.8066	4	7.7	162.5	0	10.295	9
LOC_Os01g42480.2	Q9AX74	Yip1 domain containing protein	26.0101	25.7203	25.8793	25.5815	25.8946	25.7694	26.0101	25.7203	25.8793	25.5815	25.8946	25.7694	3	21.4	24.667	0	21.084	15
LOC_Os01g42650.1	P92683	cytochrome c oxidase subunit 5B	28.5494	28.6891	28.564	30.2705	30.2527	30.2813	28.5494	28.6891	28.564	30.2705	30.2527	30.2813	5	20.7	18.047	0	30.567	44
LOC_Os01g42820.3	Q5ZDX8	RNA recognition motif containing protein	26.8898	26.8272	26.7361	26.4164	26.3354	26.3733	26.8898	26.8272	26.7361	26.4164	26.3354	26.3733	5	17.4	44.269	0	49.067	22
LOC_Os01g42850.2	Q5ZDX5	ThiF family domain containing protein	NaN	NaN	NaN	26.4453	26.5578	26.5027	23.3508	22.8321	23.5813	26.4453	26.5578	26.5027	8	9.8	113.58	0	18.408	16
LOC_Os01g42880.1	Q9FTG9	transferase family protein	24.7905	24.8733	24.8245	24.8235	24.7221	24.506	24.7905	24.8733	24.8245	24.8235	24.7221	24.506	3	9	45.705	0	7.9767	12
LOC_Os01g43030.2	Q5ZDJ3	tetratricopeptide repeat domain containing protein	26.6238	26.4759	26.4753	26.7907	26.8423	26.6335	26.6238	26.4759	26.4753	26.7907	26.8423	26.6335	6	10.5	83.067	0	31.275	18
LOC_Os01g43070.2	Q5ZDI6	psbP-related thylakoid lumenal 4	26.6395	26.8664	26.2153	27.256	27.2662	27.0021	26.6395	26.8664	26.2153	27.256	27.2662	27.0021	5	15.9	34.4	0	15.757	17
LOC_Os01g43090.1	Q5ZBH8	oxidoreductase	24.7894	24.7409	NaN	26.7689	26.571	26.5962	24.7894	24.7409	23.5451	26.7689	26.571	26.5962	4	11	37.915	0	14.638	9
LOC_Os01g43150.1	A2ZVG7	OsFtsH9 FtsH protease	26.9602	27.0501	26.8077	26.3891	26.3141	26.2032	26.9602	27.0501	26.8077	26.3891	26.3141	26.2032	7	13.1	85.792	0	26.785	20
LOC_Os01g43410.1	A2ZVI7	CAMK_CAMK_like.9 - CAMK includes calcium/calmodulin depedent kinases	27.4077	27.3427	27.4558	28.6274	28.6103	28.5953	27.4077	27.3427	27.4558	28.6274	28.6103	28.5953	9	25.1	58.739	0	117.75	27
LOC_Os01g43520.2	Q0JL46	neutral ceramidase precursor	25.2646	25.2801	25.4301	27.612	27.7703	27.7069	25.2646	25.2801	25.4301	27.612	27.7703	27.7069	6	11.3	86.592	0	38.081	20
LOC_Os01g43630.2	Q5ZEA1	adaptin	26.7073	26.4263	26.5676	27.4153	27.2342	27.009	26.7073	26.4263	26.5676	27.4153	27.2342	27.009	5	9.4	98.404	0	21.328	11
LOC_Os01g43710.1	Q9FDZ1	cytochrome P450 72A1	25.9666	25.8617	NaN	26.8971	26.3601	26.6433	25.9666	25.8617	24.6813	26.8971	26.3601	26.6433	4	8.6	59.873	0	36.461	16
LOC_Os03g36930.1	Q10I26	DEAD-box ATP-dependent RNA helicase	26.8697	26.8899	27.0021	27.2948	27.2896	27.3445	26.8697	26.8899	27.0021	27.2948	27.2896	27.3445	6	21.8	45.628	0	28.853	19
LOC_Os01g45274.1	Q7F2G3	carbonic anhydrase	33.5664	33.5563	33.534	32.6758	32.7076	32.7651	33.5664	33.5563	33.534	32.6758	32.7076	32.7651	1	55.1	29.117	0	115.66	145
LOC_Os01g45750.1	Q5VRB2	bile acid sodium symporter family protein	25.3134	25.3015	25.2018	25.6639	25.4533	25.9476	25.3134	25.3015	25.2018	25.6639	25.4533	25.9476	1	5.3	44.209	0	4.7782	11
LOC_Os01g46070.1	Q94JA2	lactate/malate dehydrogenase	NaN	NaN	NaN	26.2459	25.9759	25.9857	23.3256	22.9318	23.6087	26.2459	25.9759	25.9857	2	27.6	35.46	0	11.857	7
LOC_Os01g46510.2	Q5VPC8	peptidase S8 and S53	26.8933	27.0969	27.0086	27.9563	27.9475	27.8642	26.8933	27.0969	27.0086	27.9563	27.9475	27.8642	10	10.9	144.96	0	34.739	25
LOC_Os01g46610.1	Q7F280	dehydrogenase	26.7612	26.466	26.2194	26.3303	26.1328	26.2685	26.7612	26.466	26.2194	26.3303	26.1328	26.2685	6	20.4	46.042	0	37.979	16
LOC_Os01g46750.1	B9EYE7	AMP-binding enzyme	28.3336	28.1878	28.1445	28.4636	28.4899	28.5098	28.3336	28.1878	28.1445	28.4636	28.4899	28.5098	8	18	72.77	0	43.436	49
LOC_Os01g46810.1	A0A0N7KDF9	viral A-type inclusion repeat containing protein	NaN	NaN	NaN	25.1997	25.3937	25.3446	23.0752	23.9646	24.0223	25.1997	25.3937	25.3446	3	3.4	172.15	0	6.6667	6
LOC_Os01g46980.1	Q8SA35	vacuolar ATP synthase subunit E	29.6163	29.4327	29.5981	30.912	31.1113	31.0974	29.6163	29.4327	29.5981	30.912	31.1113	31.0974	9	41.7	26.629	0	48.116	43
LOC_Os01g47330.1	O22386	ribosomal L7/L12 C-terminal domain containing protein	30.9758	30.8309	31.0305	30.9906	30.903	30.8101	30.9758	30.8309	31.0305	30.9906	30.903	30.8101	2	50.3	18.59	0	161.14	82
LOC_Os01g47350.1	Q8LR33	enoyl-CoA hydratase/isomerase family protein	24.9616	25.0043	24.6393	24.5386	NaN	NaN	24.9616	25.0043	24.6393	24.5386	23.0549	24.5365	5	20.8	35.93	0	8.5722	6
LOC_Os01g47630.1	Q5QLQ7	expressed protein;LOC_Os01g47630.2 LOC_Os01g47630.2	27.8514	27.3473	27.5539	24.6321	NaN	NaN	27.8514	27.3473	27.5539	24.6321	25.2728	24.5423	2	19.3	19.602	0	20.263	6
LOC_Os01g47650.1	A0A0P0V678	vacuolar sorting-associated 16	25.9572	25.6998	25.4953	26.8519	26.7394	26.7353	25.9572	25.6998	25.4953	26.8519	26.7394	26.7353	5	7.1	96.57	0	13.642	17
LOC_Os05g49030.1	Q6AUF5	60S ribosomal L18a	27.6718	27.216	27.9006	27.1076	26.8999	26.6133	27.6718	27.216	27.9006	27.1076	26.8999	26.6133	1	26.4	21.459	0	10.09	15
LOC_Os01g47730.1	Q8RZ83	ras-related protein	25.6732	25.9611	25.6045	26.0191	25.7946	26.1332	25.6732	25.9611	25.6045	26.0191	25.7946	26.1332	1	21.9	24.444	0	14.88	12
LOC_Os01g48280.1	Q8W0I1	ubiquitin-conjugating enzyme	27.5922	27.3959	27.2289	28.1714	27.9707	28.0204	27.5922	27.3959	27.2289	28.1714	27.9707	28.0204	4	43.8	17.16	0	28.449	19
LOC_Os01g48420.1	Q9FR35	peroxiredoxin	28.5326	28.5463	28.5286	29.2852	29.2083	29.1981	28.5326	28.5463	28.5286	29.2852	29.2083	29.1981	7	54.9	17.291	0	34.107	28
LOC_Os01g48500.1	Q8LQP4	expressed protein	26.356	26.2007	26.0872	26.208	26.0961	26.1842	26.356	26.2007	26.0872	26.208	26.0961	26.1842	4	20.7	25.974	0	9.5984	11
LOC_Os01g48680.2	Q5QM84	two pore calcium channel 1	25.9187	26.2409	26.4883	26.4704	26.1334	26.3622	25.9187	26.2409	26.4883	26.4704	26.1334	26.3622	4	8.6	87.068	0	15.292	20
LOC_Os01g48690.2	Q0JKF5	ribosomal rpS20	25.5721	25.9217	25.5891	NaN	25.0727	25.0552	25.5721	25.9217	25.5891	23.5482	25.0727	25.0552	2	9.9	17.035	0	4.0916	2
LOC_Os01g48990.2	Q5QLG3	uncharacterized kinase mug58	29.4732	29.492	29.4778	29.0685	28.9707	29.1186	29.4732	29.492	29.4778	29.0685	28.9707	29.1186	11	41.2	44.129	0	70.426	34
LOC_Os01g49290.1	P49027	WD repeat-containing protein	28.1067	28.126	28.0885	29.7658	29.6751	29.8328	28.1067	28.126	28.0885	29.7658	29.6751	29.8328	6	34.4	36.231	0	59.4	30
LOC_Os01g49690.1	Q8RZZ3	Ser/Thr phosphatase family protein	24.2254	24.4076	24.5878	24.4478	24.2538	24.4485	24.2254	24.4076	24.5878	24.4478	24.2538	24.4485	2	6.9	34.705	0	3.9711	6
LOC_Os01g49760.1	Q0JK71	expressed protein;LOC_Os01g49760.3 LOC_Os01g49760.3	NaN	NaN	NaN	24.3513	24.6807	24.3449	23.7783	22.9286	23.8412	24.3513	24.6807	24.3449	2	5.5	66.442	0	5.2966	6
LOC_Os01g50100.1	B9EYZ4	ABC transporter	25.7118	25.0409	24.4338	28.6341	28.7778	28.1532	25.7118	25.0409	24.4338	28.6341	28.7778	28.1532	9	12.3	128.08	0	93.219	22
LOC_Os01g50310.1	Q8LJ05	VIP1 protein	25.3118	25.3267	NaN	26.2671	25.8929	25.8334	25.3118	25.3267	24.3909	26.2671	25.8929	25.8334	3	14.7	36.002	0	18.667	9
LOC_Os01g50450.1	Q5N8I8	expressed protein	25.4569	25.2812	25.3839	27.7112	27.7675	27.641	25.4569	25.2812	25.3839	27.7112	27.7675	27.641	3	27.3	27.422	0	23.612	10
LOC_Os01g50760.1	O04882	polyprenyl synthetase	25.0645	25.9611	25.7165	NaN	24.4728	24.6607	25.0645	25.9611	25.7165	24.5538	24.4728	24.6607	3	13	40.676	0	9.4811	5
LOC_Os01g50770.1	Q0JK13	adaptor complexes medium subunit family domain containing protein	24.9642	NaN	26.2326	26.3503	26.402	26.3677	24.9642	24.3913	26.2326	26.3503	26.402	26.3677	4	13.3	48.975	0	27.141	12
LOC_Os01g51120.1	Q8S0N4	vesicle transport v-SNARE protein	25.7607	25.6332	NaN	25.7524	25.5606	25.1904	25.7607	25.6332	22.6462	25.7524	25.5606	25.1904	4	26.7	24.861	0	25.545	12
LOC_Os01g51170.1	Q8LR54	glycylpeptide N-tetradecanoyltransferase 1	NaN	NaN	NaN	24.7393	24.7727	24.6636	23.2907	22.4615	22.8604	24.7393	24.7727	24.6636	3	9.2	49.709	0	4.9951	5
LOC_Os01g51300.2	Q5NAI9	WD domain	27.1077	26.916	26.8351	26.3527	26.3575	26.0294	27.1077	26.916	26.8351	26.3527	26.3575	26.0294	3	12.8	50.11	0	69.664	15
LOC_Os01g51360.3	Q5NAI4	lipase	28.6335	28.6999	28.7033	29.3427	29.2459	29.0557	28.6335	28.6999	28.7033	29.3427	29.2459	29.0557	7	24.1	49.61	0	84.097	30
LOC_Os01g51700.1	Q5JLU1	ras-related protein	27.353	26.9454	27.0886	28.0688	28.132	28.2279	27.353	26.9454	27.0886	28.0688	28.132	28.2279	3	39.6	23.261	0	18.892	18
LOC_Os01g51770.1	Q0JJV1	outer mitochondrial membrane porin	24.4474	24.5634	NaN	24.9405	25.4	24.9148	24.4474	24.5634	23.3291	24.9405	25.4	24.9148	2	14.2	33.757	0	5.2483	4
LOC_Os01g51860.1	Q5JMC7	violaxanthin de-epoxidase	25.2291	25.2778	25.2635	NaN	NaN	NaN	25.2291	25.2778	25.2635	24.1579	24.0403	23.9841	3	6	58.821	0	9.6032	7
LOC_Os01g52170.1	Q0JJS8	expressed protein	28.4099	28.3046	28.5019	27.5103	27.0555	27.1942	28.4099	28.3046	28.5019	27.5103	27.0555	27.1942	9	20.9	56.922	0	101.11	32
LOC_Os01g52214.1	Q8W0E8	ubiquinone oxidoreductase	27.0264	27.1782	27.1152	27.9147	28.5329	28.173	27.0264	27.1782	27.1152	27.9147	28.5329	28.173	4	18.1	21.876	0	26.985	12
LOC_Os01g52240.1	Q8W0E6	chlorophyll A-B binding protein	33.866	33.8269	33.6792	31.8147	31.7478	31.5577	33.866	33.8269	33.6792	31.8147	31.7478	31.5577	4	55.8	27.902	0	110.27	41
LOC_Os01g52390.1	Q8W0D1	plasminogen activator inhibitor 1 RNA-binding protein	30.3198	30.6419	30.5172	26.9213	26.0494	25.9924	30.3198	30.6419	30.5172	26.9213	26.0494	25.9924	6	37.6	40.425	0	160	30
LOC_Os01g52500.3	B9EZH0	NADP-dependent malic enzyme	NaN	NaN	NaN	27.4994	27.5921	27.3629	23.1515	22.8398	23.6973	27.4994	27.5921	27.3629	5	13.5	65.396	0	18.458	23
LOC_Os01g53140.1	Q0JJL1	expressed protein	27.3787	27.6587	27.6207	NaN	27.6021	NaN	27.3787	27.6587	27.6207	24.8715	27.6021	24.1684	2	11	18.014	0	14.182	8
LOC_Os01g53330.1	Q942C5	anthocyanidin 5	24.5455	25.0781	24.4956	NaN	NaN	NaN	24.5455	25.0781	24.4956	23.8468	23.8177	23.8771	4	16.3	51.927	0	5.7194	6
LOC_Os01g53700.1	Q5JNL6	mitochondrial-processing peptidase subunit	29.5781	29.4649	29.6712	29.4486	29.4916	29.1014	29.5781	29.4649	29.6712	29.4486	29.4916	29.1014	13	43.7	54.227	0	121.16	67
LOC_Os01g53720.1	A0A0P0V805	expressed protein;LOC_Os01g53720.2 LOC_Os01g53720.2	26.4777	26.2091	26.6732	26.8916	27.1667	26.8896	26.4777	26.2091	26.6732	26.8916	27.1667	26.8896	5	15.9	59.865	0	43.781	16
LOC_Os01g53930.1	Q8LQ68	hexokinase	31.141	31.0426	31.0502	31.5866	31.5046	31.6002	31.141	31.0426	31.0502	31.5866	31.5046	31.6002	14	44.9	55.12	0	244.21	106
LOC_Os01g54480.1	Q5JNI5	serine/threonine kinase	NaN	NaN	24.7547	25.8819	25.5758	25.9549	23.025	23.7056	24.7547	25.8819	25.5758	25.9549	3	7.1	52.999	0	6.2964	7
LOC_Os01g54510.1	Q94J22	MAC/Perforin domain containing protein	NaN	NaN	24.6494	25.8189	25.6536	25.5984	24.1678	22.9985	24.6494	25.8189	25.6536	25.5984	4	8.3	61.049	0	9.2896	12
LOC_Os01g54540.1	Q94J17	ribosomal L13	27.6534	27.5818	27.7142	26.7747	26.8649	27.1089	27.6534	27.5818	27.7142	26.7747	26.8649	27.1089	5	23.2	26.244	0	14.948	20
LOC_Os01g54560.1	Q5JNJ1	trehalose synthase	27.9339	27.953	28.1341	28.6986	28.7381	28.7993	27.9339	27.953	28.1341	28.6986	28.7381	28.7993	9	22.1	102.27	0	70.536	50
LOC_Os01g54910.1	Q5JMX4	GTP-binding typA/bipA	NaN	NaN	NaN	25.0927	25.085	25.1904	22.4633	22.4532	23.056	25.0927	25.085	25.1904	2	4.6	72.795	0	4.2919	3
LOC_Os01g54940.1	Q5JMM6	dehydrogenase	26.1692	26.6399	26.5986	28.5509	28.4813	28.4674	26.1692	26.6399	26.5986	28.5509	28.4813	28.4674	8	27.1	38.814	0	27.981	22
LOC_Os01g55540.1	Q0JJ47	aminotransferase	26.6757	26.3724	26.4925	28.1034	27.982	28.2535	26.6757	26.3724	26.4925	28.1034	27.982	28.2535	7	18.7	49.933	0	34.64	20
LOC_Os01g55770.1	Q5JMG1	expressed protein	28.2212	28.2855	28.1805	29.2183	29.1825	28.9288	28.2212	28.2855	28.1805	29.2183	29.1825	28.9288	5	47.4	15.444	0	16.041	27
LOC_Os01g55830.1	Q0JJ25	glutathione S-transferase	26.7944	26.84	26.5928	NaN	NaN	NaN	26.7944	26.84	26.5928	23.1006	24.0622	24.2861	3	18.6	23.977	0	13.744	9
LOC_Os01g56140.1	Q8LIX8	expressed protein	NaN	NaN	NaN	25.4719	25.4472	25.4035	23.5048	24.1509	24.3084	25.4719	25.4472	25.4035	2	2	113.61	0	8.4211	5
LOC_Os01g56300.1	Q5ZAQ3	expressed protein;LOC_Os02g31220.2 LOC_Os02g31220.2	24.5336	24.7125	NaN	25.263	25.0171	25.2591	24.5336	24.7125	24.3119	25.263	25.0171	25.2591	4	4.8	87.391	0	6.858	6
LOC_Os01g56600.1	Q8S1I8	signal recognition particle 54 kDa protein	25.946	25.7987	26.124	26.9999	26.79	26.3012	25.946	25.7987	26.124	26.9999	26.79	26.3012	5	9.3	54.754	0	13.311	10
LOC_Os01g56910.1	Q5ZAZ1	expressed protein	25.5917	NaN	25.9192	25.6266	26.1221	26.1701	25.5917	23.2085	25.9192	25.6266	26.1221	26.1701	4	5.6	117.24	0	10.543	6
LOC_Os01g57570.1	Q8LQN2	NADPH-dependent FMN reductase domain containing protein	29.0352	28.9566	29.08	29.627	29.9157	29.6803	29.0352	28.9566	29.08	29.627	29.9157	29.6803	4	45.8	21.705	0	68.171	48
LOC_Os10g21324.1	A0A0K0LQZ8	cytochrome b6	34.0915	34.0561	34.1476	31.7806	31.8777	32.0137	34.0915	34.0561	34.1476	31.7806	31.8777	32.0137	6	26.7	26.013	0	30.181	66
LOC_Os10g21328.1	E9KIR2	DNA-directed RNA polymerase subunit alpha	NaN	NaN	NaN	25.9517	25.8015	25.6397	21.7877	24.4397	24.4081	25.9517	25.8015	25.6397	4	22.6	38.695	0	5.2677	12
LOC_Os10g21342.1	Q7F4T2	chloroplast 50S ribosomal L14	30.6189	30.634	30.5431	29.7038	29.74	29.8726	30.6189	30.634	30.5431	29.7038	29.74	29.8726	6	55.3	13.565	0	50.974	38
LOC_Os01g57958.1	E9KIR7	chloroplast 50S ribosomal L16	29.2562	29.4855	29.3006	28.5728	28.7037	28.682	29.2562	29.4855	29.3006	28.5728	28.7037	28.682	4	47.5	13.521	0	47.813	33
LOC_Os10g38234.1	Q8S7T4	photosystem I P700 chlorophyll a apoA2	35.8106	35.7122	35.7419	33.8625	33.9401	33.9305	35.8106	35.7122	35.7419	33.8625	33.9401	33.9305	16	25.7	82.587	0	323.31	278
LOC_Os10g21250.1	Q8S6F6	photosystem I P700 chlorophyll a apoA1	35.1173	35.276	35.3446	33.0325	32.9976	33.1023	35.1173	35.276	35.3446	33.0325	32.9976	33.1023	12	17.6	83.198	0	107.96	159
LOC_Os10g38216.1	Q5N987	photosystem I assembly ycf3	28.3825	28.0679	28.3294	26.7923	27.0062	26.8231	28.3825	28.0679	28.3294	26.7923	27.0062	26.8231	3	26	19.658	0	5.6826	11
LOC_Os06g39756.1	E9KIP6	ATP synthase epsilon chain	31.2885	31.7634	31.8234	29.0742	29.2033	29.1462	31.2885	31.7634	31.8234	29.0742	29.2033	29.1462	4	79.6	15.247	0	9.9908	20
LOC_Os01g58022.1	A0A0K0LR65	NADPH-dependent oxidoreductase	29.658	29.3826	29.5295	27.1364	27.4633	27.6317	29.658	29.3826	29.5295	27.1364	27.4633	27.6317	6	36.9	25.216	0	49.908	25
LOC_Os10g38212.1	Q7G800	NADPH-dependent oxidoreductase	29.7575	29.7743	29.7795	28.4877	28.371	28.2899	29.7575	29.7743	29.7795	28.4877	28.371	28.2899	6	49.1	18.783	0	47.786	29
LOC_Os01g58114.1	Q8S1L2	expressed protein	NaN	25.5907	NaN	26.0913	25.8945	26.3624	24.6115	25.5907	23.0703	26.0913	25.8945	26.3624	2	12.1	61.682	0	19.951	11
LOC_Os01g58390.1	A0A0P0V9C8	haloacid dehalogenase	25.9098	25.7594	25.5634	25.7115	25.9276	25.9401	25.9098	25.7594	25.5634	25.7115	25.9276	25.9401	2	23.2	18.961	0	14.106	11
LOC_Os01g58470.1	Q5VQK9	expressed protein	29.1371	29.9051	29.5751	27.4967	27.7166	27.6232	29.1371	29.9051	29.5751	27.4967	27.7166	27.6232	7	25	31.746	0	43.57	18
LOC_Os01g58580.1	Q8LJ88	ICE-like protease p20 domain containing protein	26.936	26.911	26.6767	27.7794	27.7574	27.9634	26.936	26.911	26.6767	27.7794	27.7574	27.9634	5	23.7	45.885	0	18.137	23
LOC_Os01g59080.1	Q8LR94	expressed protein	28.5091	28.6336	28.7846	NaN	NaN	NaN	28.5091	28.6336	28.7846	23.6931	23.9916	23.3141	4	11	22.859	0	134.08	14
LOC_Os01g59090.1	Q5VQX1	thylakoid lumenal 20 kDa protein	30.5726	30.4085	30.3803	31.2879	31.5031	31.3732	30.5726	30.4085	30.3803	31.2879	31.5031	31.3732	7	42.6	28.804	0	124.87	50
LOC_Os01g59150.2	P45960	tubulin/FtsZ domain containing protein	26.1399	26.0557	25.5699	NaN	24.909	NaN	26.1399	26.0557	25.5699	23.8506	24.909	24.1828	1	35.1	50.289	0	19.815	8
LOC_Os01g59530.2	Q8S1Y9	OsCML1 - Calmodulin-related calcium sensor protein	29.9951	29.9732	29.9161	28.5315	28.6962	28.8489	29.9951	29.9732	29.9161	28.5315	28.6962	28.8489	6	64.4	16.819	0	153.82	29
LOC_Os01g59600.2	Q9LSU0	peptidase	NaN	NaN	24.2953	26.4411	26.4301	26.4951	23.5735	22.6515	24.2953	26.4411	26.4301	26.4951	2	7.6	27.238	0	4.0201	7
LOC_Os01g59740.1	Q5VQR0	expressed protein	27.7011	27.7818	27.6684	28.8732	28.9525	28.922	27.7011	27.7818	27.6684	28.8732	28.9525	28.922	3	9.2	35.052	0	108.97	16
LOC_Os05g41060.1	Q0DH67	ADP-ribosylation factor	30.0406	30.2873	30.2247	30.5582	30.7195	30.6708	30.0406	30.2873	30.2247	30.5582	30.7195	30.6708	1	58.6	20.708	0	80.673	54
LOC_Os01g59930.1	Q5N760	NADH-cytochrome b5 reductase	27.5835	27.6243	27.7117	28.337	28.3473	28.5187	27.5835	27.6243	27.7117	28.337	28.3473	28.5187	6	39.8	31.024	0	25.864	19
LOC_Os01g59990.2	Q5N754	ribosomal L24	28.1081	27.8826	27.8768	26.212	26.6887	26.5935	28.1081	27.8826	27.8768	26.212	26.6887	26.5935	1	19.8	18.453	0	7.8464	13
LOC_Os01g60190.2	Q5QMK7	2	27.0645	26.9798	26.8541	27.2083	27.4749	27.324	27.0645	26.9798	26.8541	27.2083	27.4749	27.324	7	19.3	60.789	0	13.764	14
LOC_Os01g60440.1	Q5QLZ5	HEAT repeat family protein	26.3247	26.2328	26.3375	26.3573	26.5473	26.4142	26.3247	26.2328	26.3375	26.3573	26.5473	26.4142	7	10.7	89.626	0	19.744	20
LOC_Os01g60650.1	Q5QM65	non-green plastid inner envelope membrane protein	28.9819	28.9837	28.8883	28.9828	28.7983	28.8618	28.9819	28.9837	28.8883	28.9828	28.7983	28.8618	4	19.5	35.522	0	71.342	23
LOC_Os01g60830.1	Q8LRD0	expressed protein	26.5769	26.0965	26.376	NaN	NaN	NaN	26.5769	26.0965	26.376	25.0083	23.2439	24.4835	2	17.1	19.235	0	11.151	6
LOC_Os01g61044.1	B9EU85	transmembrane amino acid transporter protein	NaN	NaN	NaN	24.7235	25.0279	24.9098	23.6174	23.4207	23.8113	24.7235	25.0279	24.9098	2	8.5	47.87	0	6.8786	4
LOC_Os01g61410.3	Q5QLT6	NADH-ubiquinone oxidoreductase	28.2844	28.1104	28.2689	28.1186	27.995	28.3081	28.2844	28.1104	28.2689	28.1186	27.995	28.3081	7	21.3	49.508	0	56.932	21
LOC_Os10g39410.1	Q7XUC9	Core histone H2A/H2B/H3/H4 domain containing protein	32.7072	32.7391	32.6196	30.9887	31.1008	31.1285	32.7072	32.7391	32.6196	30.9887	31.1008	31.1285	8	50.5	11.409	0	92.689	85
LOC_Os01g62020.1	Q8W3J1	NAD dependent epimerase/dehydratase family domain containing protein	25.8672	25.9693	25.6839	25.8227	25.8031	25.8814	25.8672	25.9693	25.6839	25.8227	25.8031	25.8814	1	12.4	45.831	0	14.765	14
LOC_Os07g08170.1	B7FAF4	ruvB-like	26.9771	26.7767	26.9242	27.9366	27.7157	27.8631	26.9771	26.7767	26.9242	27.9366	27.7157	27.8631	7	22	49.611	0	30.078	24
LOC_Os01g62430.3	Q0JHU5	C2 domain containing protein	NaN	NaN	NaN	25.9935	26.0586	25.9882	22.4387	23.2153	23.5565	25.9935	26.0586	25.9882	2	15.4	17.436	0	5.1216	5
LOC_Os01g63210.1	Q8LQ41	SOUL heme-binding protein	27.0783	27.8753	27.7	26.0723	26.2109	26.1155	27.0783	27.8753	27.7	26.0723	26.2109	26.1155	3	21.8	23.546	0	22.954	11
LOC_Os01g63270.2	Q8LQ33	alpha-glucan phosphorylast isozyme	26.3063	26.0289	26.0825	26.5059	26.7529	26.8138	26.3063	26.0289	26.0825	26.5059	26.7529	26.8138	5	12.2	89.972	0	9.3825	13
LOC_Os01g63410.1	Q5N9C0	expressed protein	25.1479	24.9858	25.2453	25.3837	25.3719	25.504	25.1479	24.9858	25.2453	25.3837	25.3719	25.504	3	12.3	29.334	0	8.1517	6
LOC_Os01g63990.5	Q94DD0	hydrolase	27.2605	27.1789	26.7519	28.066	28.0844	28.2167	27.2605	27.1789	26.7519	28.066	28.0844	28.2167	6	17.9	38.968	0	45.9	17
LOC_Os01g64090.1	B7F9R7	L1P family of ribosomal proteins domain containing protein	27.8151	27.9431	28.0913	27.1524	26.7915	27.1814	27.8151	27.9431	28.0913	27.1524	26.7915	27.1814	1	25.5	24.625	0	24.8	20
LOC_Os01g64270.1	Q94CW5	expressed protein	28.15	28.1089	28.0787	28.0462	28.0003	28.0178	28.15	28.1089	28.0787	28.0462	28.0003	28.0178	3	16.7	20.031	0	21.378	12
LOC_Os01g64280.1	Q5N7G9	sorting nexin 1	26.6411	26.7517	27.2483	27.3217	27.4114	27.5594	26.6411	26.7517	27.2483	27.3217	27.4114	27.5594	8	27.6	45.775	0	37.207	21
LOC_Os01g64630.4	A2ZZX3	actin	27.9255	28.4684	27.5923	29.4642	29.8759	29.7143	27.9255	28.4684	27.5923	29.4642	29.8759	29.7143	7	48.4	41.614	0	28.074	30
LOC_Os01g64650.2	Q5N9F2	VAMP-like YKT62	25.9014	26.3464	26.3528	26.9308	26.8595	26.9695	25.9014	26.3464	26.3528	26.9308	26.8595	26.9695	3	15.7	23.612	0	9.704	11
LOC_Os01g64660.2	Q0JHF8	fructose-1	28.1252	28.0349	27.9335	27.8483	27.8017	28.0186	28.1252	28.0349	27.9335	27.8483	27.8017	28.0186	7	22.7	37.035	0	36.43	27
LOC_Os01g64860.1	Q8S1N3	OsSub11 - Putative Subtilisin homologue	28.5497	28.5769	28.5307	29.254	29.2612	29.2746	28.5497	28.5769	28.5307	29.254	29.2612	29.2746	10	19.1	78.81	0	137.75	25
LOC_Os01g64960.1	Q943K1	chlorophyll A-B binding protein	35.2717	35.23	35.2703	33.6589	33.7472	33.7453	35.2717	35.23	35.2703	33.6589	33.7472	33.7453	6	33.2	27.903	0	184.29	188
LOC_Os01g65090.1	Q5N9Z8	aminotransferase	24.3974	24.7432	24.7514	24.9416	24.6412	NaN	24.3974	24.7432	24.7514	24.9416	24.6412	23.3076	3	9	48.908	0	5.3591	6
LOC_Os01g65100.1	Q5N747	peptide transporter	27.9066	27.7316	27.8477	26.4453	26.6209	26.7325	27.9066	27.7316	27.8477	26.4453	26.6209	26.7325	2	4.6	58.991	0	8.7677	12
LOC_Os01g65260.1	Q8RUM9	amidophosphoribosyltransferase	27.837	27.7596	27.7393	27.4479	27.7163	27.5769	27.837	27.7596	27.7393	27.4479	27.7163	27.5769	3	14.9	58.854	0	46.155	26
LOC_Os01g65380.1	Q8RYZ1	patellin protein	28.3856	28.4151	28.3151	30.0499	29.8949	30.1194	28.3856	28.4151	28.3151	30.0499	29.8949	30.1194	10	22.8	66.457	0	52.864	35
LOC_Os01g65690.1	Q8L3U9	4	26.6691	26.5648	26.2143	26.3756	26.4993	26.3022	26.6691	26.5648	26.2143	26.3756	26.4993	26.3022	5	26.4	30.427	0	33.417	17
LOC_Os10g21290.1	Q7F2L6	apocytochrome f precursor	35.6831	35.6399	35.5819	33.5077	33.2791	33.5005	35.6831	35.6399	35.5819	33.5077	33.2791	33.5005	7	68.1	35.467	0	323.31	326
LOC_Os01g66000.1	Q0JH55	NADH dehydrogenase I subunit N	30.4018	30.273	30.3461	28.6854	28.5605	28.8131	30.4018	30.273	30.3461	28.6854	28.5605	28.8131	9	51.2	23.595	0	38.177	43
LOC_Os01g66560.1	Q5N842	signal recognition particle 72 kDa protein	25.7242	NaN	25.9204	26.8727	26.7899	26.7503	25.7242	23.8941	25.9204	26.8727	26.7899	26.7503	5	13	73.573	0	28.91	14
LOC_Os01g66600.2	Q0JH17	rhodanese-like	26.9417	26.8551	27.2532	24.4411	NaN	24.7004	26.9417	26.8551	27.2532	24.4411	23.1536	24.7004	6	15.9	37.5	0	18.897	15
LOC_Os01g66610.1	Q8LQH1	serine/threonine-kinase receptor precursor	24.8635	24.5515	25.0809	25.4059	25.3237	25.2574	24.8635	24.5515	25.0809	25.4059	25.3237	25.2574	3	6.8	89.304	0	18.723	11
LOC_Os01g66940.1	Q0JGZ6	kinase	25.4755	26.035	25.6581	25.8488	NaN	25.6469	25.4755	26.035	25.6581	25.8488	23.6425	25.6469	3	16.4	34.72	0	15.066	9
LOC_Os01g66980.2	Q5JLV2	expressed protein;LOC_Os01g66980.1 LOC_Os01g66980.1	27.9254	28.4438	27.8618	28.6328	28.6707	28.5816	27.9254	28.4438	27.8618	28.6328	28.6707	28.5816	3	17.4	21.78	0	75.49	17
LOC_Os01g67000.1	Q8S0J7	membrane-associated 30 kDa protein	30.2943	30.2532	30.1968	29.7023	29.5671	29.7519	30.2943	30.2532	30.1968	29.7023	29.5671	29.7519	10	43.2	35.088	0	184.91	66
LOC_Os01g67054.2	Q8LJ85	calreticulin precursor protein	NaN	NaN	NaN	26.3121	26.7383	26.6559	24.2726	25.1382	23.1501	26.3121	26.7383	26.6559	2	8.2	47.675	0	10.899	4
LOC_Os01g67120.1	Q0JGY3	rhodanese-like domain containing protein	32.5804	32.5849	32.6096	30.792	30.766	30.8527	32.5804	32.5849	32.6096	30.792	30.766	30.8527	23	37.4	65.047	0	323.31	117
LOC_Os01g67126.1	Q8L4L4	ribosomal L18p/L5e family protein	29.4455	29.9528	29.8598	29.074	28.969	29.1087	29.4455	29.9528	29.8598	29.074	28.969	29.1087	2	30.9	34.334	0	37.366	39
LOC_Os01g67570.1	Q5N6Y3	PDE312/PTAC10	25.2217	25.3014	25.2899	25.7038	25.7613	25.2488	25.2217	25.3014	25.2899	25.7038	25.7613	25.2488	3	10.9	55.001	0	20.086	9
LOC_Os01g67590.1	Q5N6Y0	oligopeptidase	24.6831	24.3745	24.7469	NaN	NaN	NaN	24.6831	24.3745	24.7469	23.8011	23.6982	23.5827	4	6.8	78.851	0	8.0279	7
LOC_Os01g67720.1	Q5N6W3	ABC1 family domain containing protein	27.7822	27.8277	27.8617	27.4415	27.5086	27.5618	27.7822	27.8277	27.8617	27.4415	27.5086	27.5618	8	18.5	55.29	0	19.085	22
LOC_Os01g67860.1	Q5N725	fructose-bisphospate aldolase isozyme	28.4514	28.3446	28.5678	29.767	29.8593	29.9287	28.4514	28.3446	28.5678	29.767	29.8593	29.9287	3	30.2	38.823	0	105.38	31
LOC_Os01g67880.1	Q5N723	vacuolar sorting-associated 53	26.1575	25.9468	25.9094	26.6929	26.827	26.7432	26.1575	25.9468	25.9094	26.6929	26.827	26.7432	5	16	43.464	0	20.516	14
LOC_Os01g67960.1	Q5N714	GPI transamidase component PIG-S-related	NaN	NaN	NaN	25.6771	25.6078	25.3136	23.8843	25.0922	22.8939	25.6771	25.6078	25.3136	2	5	66.575	0	3.0675	4
LOC_Os01g68320.2	Q5N7W4	DEAD-box ATP-dependent RNA helicase 30	26.9358	26.9628	26.4261	27.3311	26.8662	27.3405	26.9358	26.9628	26.4261	27.3311	26.8662	27.3405	6	16.7	72.188	0	25.653	16
LOC_Os01g68324.2	Q5N7W3	dolichyl-diphosphooligosaccharide--glycosyltransferase 63 kDasubunit precursor	29.729	29.8906	29.7663	30.3795	30.3144	30.4471	29.729	29.8906	29.7663	30.3795	30.3144	30.4471	18	33	75.206	0	70.195	76
LOC_Os01g68330.1	B9EVI2	antigen peptide transporter-like 1	29.9676	30.0158	29.7847	29.4802	29.5761	29.542	29.9676	30.0158	29.7847	29.4802	29.5761	29.542	11	31.4	55.827	0	167.34	56
LOC_Os01g68450.2	Q5N7X2	expressed protein;LOC_Os01g68450.1 LOC_Os01g68450.1	30.1603	29.8867	29.8143	28.3057	28.2459	28.3488	30.1603	29.8867	29.8143	28.3057	28.2459	28.3488	5	23.6	25.866	0	57.497	27
LOC_Os01g68480.1	Q8S091	thioredoxin	28.7692	28.5769	29.0335	26.103	NaN	26.3691	28.7692	28.5769	29.0335	26.103	23.615	26.3691	3	14.4	19.747	0	10.155	13
LOC_Os01g68750.1	Q8RZX0	adaptin	27.0167	27.1557	26.57	27.6933	27.7169	27.7503	27.0167	27.1557	26.57	27.6933	27.7169	27.7503	8	10.8	103.79	0	39.325	24
LOC_Os01g68770.1	Q8RZW7	selenium-binding protein	26.8409	26.9249	26.7894	28.0518	28.0154	28.0858	26.8409	26.9249	26.7894	28.0518	28.0154	28.0858	6	18.3	53.135	0	24.423	20
LOC_Os01g68860.2	A0A0P0VC32	zinc finger C-x8-C-x5-C-x3-H type family protein	25.7067	26.1417	NaN	25.9114	25.8748	25.763	25.7067	26.1417	23.6627	25.9114	25.8748	25.763	3	12.7	35.664	0	8.4472	8
LOC_Os01g69030.1	Q0JGK4	sucrose-phosphate synthase	26.9878	26.9908	27.2566	27.688	27.729	27.9217	26.9878	26.9908	27.2566	27.688	27.729	27.9217	7	9.2	114.22	0	19.818	23
LOC_Os01g69130.2	Q5JJJ5	dynamin family protein	28.4606	28.5993	28.2664	29.3944	29.2951	29.2873	28.4606	28.5993	28.2664	29.3944	29.2951	29.2873	13	25.7	86.26	0	78.147	57
LOC_Os01g69250.2	Q5JJI4	mitochondrial import receptor subunit TOM20	27.7779	27.8773	27.8847	26.8967	NaN	26.9955	27.7779	27.8773	27.8847	26.8967	24.6957	26.9955	2	13.6	19.628	0	23.03	10
LOC_Os01g69900.1	A3A121	CBS domain-containing protein	25.9704	26.0738	26.0802	26.5759	26.5297	26.6628	25.9704	26.0738	26.0802	26.5759	26.5297	26.6628	3	8	59.165	0	16.595	12
LOC_Os01g69950.1	O65037	ribosomal L27	28.6681	29.2543	29.0532	NaN	26.4565	27.4637	28.6681	29.2543	29.0532	23.4431	26.4565	27.4637	2	14.4	21.268	0	20.778	11
LOC_Os01g70020.1	Q5JKH1	DEK C terminal domain containing protein	24.893	24.6192	24.862	NaN	NaN	NaN	24.893	24.6192	24.862	24.5133	24.9241	23.6556	2	4.7	56.266	0	6.4833	4
LOC_Os01g70090.1	Q8RUL6	enoyl-CoA hydratase/isomerase family protein	NaN	NaN	NaN	25.5236	25.6025	25.4175	23.9153	24.9917	22.8395	25.5236	25.6025	25.4175	3	12.4	30.576	0	12.916	7
LOC_Os01g70170.1	Q5JK10	transaldolase	27.8755	27.9041	27.8961	28.0457	28.127	28.3835	27.8755	27.9041	27.8961	28.0457	28.127	28.3835	9	33.8	46.43	0	42.382	31
LOC_Os01g70400.1	Q5JK31	expressed protein	29.5854	29.5444	29.6027	25.0963	25.81	25.5763	29.5854	29.5444	29.6027	25.0963	25.81	25.5763	7	33.9	25.93	0	64.738	26
LOC_Os01g70770.1	Q8LR62	glutathione S-transferase	25.4048	26.1763	26.0721	26.1258	25.2769	25.0303	25.4048	26.1763	26.0721	26.1258	25.2769	25.0303	4	27.1	24.082	0	15.434	14
LOC_Os01g70820.1	A3A196	lumenal PsbP	25.666	25.762	26.0465	NaN	NaN	NaN	25.666	25.762	26.0465	23.7169	25.5321	23.948	4	17	30.607	0	10.822	11
LOC_Os01g70960.1	Q942X6	cytochrome c1-1	26.0723	25.9822	26.1036	27.3742	27.7648	27.7913	26.0723	25.9822	26.1036	27.3742	27.7648	27.7913	2	36.2	33.268	0	31.562	9
LOC_Os01g71190.1	Q0JG75	photosystem II reaction center PSB28 protein	28.3765	28.852	28.8422	28.9727	28.9596	28.8988	28.3765	28.852	28.8422	28.9727	28.9596	28.8988	2	16.1	19.736	0	146.49	20
LOC_Os01g71320.1	Q2KNB4	hexokinase	27.7328	27.8918	28.0408	28.1585	28.1554	28.1824	27.7328	27.8918	28.0408	28.1585	28.1554	28.1824	8	24.4	53.794	0	41.152	35
LOC_Os01g71670.1	Q94CR1	glycosyl hydrolases family 17	25.5296	25.7739	26.2392	28.298	28.4712	28.4039	25.5296	25.7739	26.2392	28.298	28.4712	28.4039	8	34.7	35.682	0	68.153	22
LOC_Os01g71990.1	Q8GT01	pyrroline-5-carboxylate reductase	26.2268	25.9334	25.6057	26.3297	26.2698	26.1929	26.2268	25.9334	25.6057	26.3297	26.2698	26.1929	3	15.1	29.67	0	9.8403	9
LOC_Os01g72020.2	A2CIR7	BTBA3 - Bric-a-Brac	23.7895	23.8338	23.9131	25.1888	24.5257	24.5012	23.7895	23.8338	23.9131	25.1888	24.5257	24.5012	2	4.6	53.189	0	4.1623	3
LOC_Os01g72260.1	Q5JKW8	cytochrome P450	26.5789	26.5522	26.2523	26.8416	26.5329	26.7262	26.5789	26.5522	26.2523	26.8416	26.5329	26.7262	6	16.8	60.508	0	44.448	23
LOC_Os01g72790.1	Q5JK68	cyclin-dependent kinase	25.4295	25.7074	25.608	26.5119	26.4456	26.6436	25.4295	25.7074	25.608	26.5119	26.4456	26.6436	3	7.8	56.825	0	6.8441	14
LOC_Os01g72800.1	Q5JK67	signal recognition particle receptor	29.2239	28.8251	28.734	28.6368	28.7647	28.7062	29.2239	28.8251	28.734	28.6368	28.7647	28.7062	7	27.5	39.254	0	52.029	27
LOC_Os01g72860.1	Q5JN47	MAC/Perforin domain containing protein	NaN	26.3663	26.7842	27.3058	27.2612	27.8762	22.6042	26.3663	26.7842	27.3058	27.2612	27.8762	8	22.2	68.031	0	16.381	16
LOC_Os01g72950.1	Q5JN29	expressed protein	26.5128	26.5881	26.7754	26.7416	26.7786	26.6831	26.5128	26.5881	26.7754	26.7416	26.7786	26.6831	2	9.8	17.875	0	3.3762	10
LOC_Os01g72960.1	Q5JN39	expressed protein	NaN	24.6565	NaN	25.3427	25.7169	25.901	23.5278	24.6565	22.6759	25.3427	25.7169	25.901	3	21.8	17.029	0	10.3	7
LOC_Os01g72990.2	Q5JN27	expressed protein;LOC_Os01g72990.1 LOC_Os01g72990.1	27.2639	27.1488	27.2471	28.6981	28.7236	28.6721	27.2639	27.1488	27.2471	28.6981	28.7236	28.6721	7	14.6	105.1	0	70.207	35
LOC_Os01g73170.1	Q5JMS4	peroxidase precursor	28.6265	28.6819	28.6357	29.7864	29.7479	29.8259	28.6265	28.6819	28.6357	29.7864	29.7479	29.8259	7	26.5	39.638	0	47.88	28
LOC_Os01g73234.2	Q5JMR9	thioredoxin	26.541	26.4536	26.5509	26.0188	25.7782	25.8652	26.541	26.4536	26.5509	26.0188	25.7782	25.8652	2	20.2	18.181	0	5.9797	7
LOC_Os01g73310.1	Q94DL4	actin	25.3241	NaN	NaN	26.4187	26.1555	25.9594	25.3241	24.374	24.2803	26.4187	26.1555	25.9594	2	48	41.727	0	6.9311	6
LOC_Os01g73420.1	Q5JJW1	mitochondrial carrier protein	25.5001	25.6737	NaN	25.9208	26.642	25.982	25.5001	25.6737	23.1673	25.9208	26.642	25.982	2	5.9	38.444	0	5.1832	6
LOC_Os01g73530.1	Q5JJV5	ABC transporter	25.904	NaN	25.9656	26.7349	26.8125	26.6788	25.904	23.0521	25.9656	26.7349	26.8125	26.6788	3	9.4	147.29	0	24.812	14
LOC_Os01g73540.1	Q0JFR4	YGGT family protein	27.6977	27.436	27.6242	26.2794	26.2884	25.793	27.6977	27.436	27.6242	26.2794	26.2884	25.793	2	15.7	20.885	0	3.5603	13
LOC_Os01g73910.2	Q94DI2	peptidase	26.796	26.7534	27.0755	NaN	27.3941	27.368	26.796	26.7534	27.0755	24.0744	27.3941	27.368	5	18.3	36.082	0	18.735	16
LOC_Os01g74010.2	Q5JME4	cyclase/dehydrase family protein	25.8819	26.0773	26.041	27.3964	27.3841	27.1426	25.8819	26.0773	26.041	27.3964	27.3841	27.1426	4	15.5	29.709	0	8.9593	15
LOC_Os01g74280.1	Q5JL23	TGD2	28.0869	27.9509	28.0792	28.1308	28.0671	28.2521	28.0869	27.9509	28.0792	28.1308	28.0671	28.2521	8	28.4	40.219	0	88.239	41
LOC_Os01g74450.1	Q94CS9	aquaporin protein	28.1836	28.2369	27.819	27.2744	NaN	27.7478	28.1836	28.2369	27.819	27.2744	23.6738	27.7478	1	6.3	25.32	0	5.5602	13
LOC_Os01g74650.3	Q5JNB0	cysteine synthase	29.9404	29.821	29.8098	29.4306	29.4665	29.5387	29.9404	29.821	29.8098	29.4306	29.4665	29.5387	12	50.8	41.788	0	121.52	69
LOC_Os02g01070.1	Q6YU98	FG-GAP repeat-containing protein	25.3919	23.8278	NaN	25.849	26.015	25.7301	25.3919	23.8278	22.2562	25.849	26.015	25.7301	3	5.8	77.475	0	21.128	8
LOC_Os02g01100.3	Q6YU97	transmembrane amino acid transporter protein	NaN	NaN	NaN	24.6663	24.723	24.0885	24.2632	23.0853	23.8475	24.6663	24.723	24.0885	1	4.2	62.625	0	4.1181	5
LOC_Os02g01150.2	Q6YU90	erythronate-4-phosphate dehydrogenase domain containing protein	30.2759	30.2856	30.2554	30.1714	30.1097	29.968	30.2759	30.2856	30.2554	30.1714	30.1097	29.968	14	47.2	42.074	0	69.495	68
LOC_Os02g01170.1	Q6YU89	HECT-domain domain containing protein	27.1028	27.0209	27.364	27.5404	27.4829	27.614	27.1028	27.0209	27.364	27.5404	27.4829	27.614	7	10.4	90.818	0	31.57	16
LOC_Os03g13760.1	Q10PA9	LSM domain containing protein	27.3518	27.9981	27.869	NaN	NaN	25.845	27.3518	27.9981	27.869	24.3594	24.1084	25.845	3	25.8	14.265	0	7.3712	12
LOC_Os02g01340.2	Q6ZFJ3	ferredoxin--NADP reductase	34.0746	33.8149	33.8328	30.757	30.7517	30.8893	34.0746	33.8149	33.8328	30.757	30.7517	30.8893	15	43.7	40.664	0	192.53	166
LOC_Os02g01440.1	Q6YPG5	nitric oxide synthase 1	24.8916	24.9007	24.8772	NaN	NaN	NaN	24.8916	24.9007	24.8772	23.9453	23.9207	23.1776	3	7.9	59.51	0	10.503	7
LOC_Os02g01450.1	Q6YPG4	expressed protein	27.023	27.253	27.1501	28.1312	28.0846	28.166	27.023	27.253	27.1501	28.1312	28.0846	28.166	4	18.6	29.613	0	20.383	19
LOC_Os02g01500.1	Q6YPG2	2-oxo acid dehydrogenases acyltransferase domain containing protein	25.935	25.9873	25.8764	26.734	26.6342	26.5929	25.935	25.9873	25.8764	26.734	26.6342	26.5929	2	11.9	58.997	0	13.466	11
LOC_Os02g01510.1	Q0E4Q5	lactate/malate dehydrogenase	24.7017	24.9275	24.6883	25.571	26.257	25.5716	24.7017	24.9275	24.6883	25.571	26.257	25.5716	3	9.7	42.719	0	8.1771	8
LOC_Os02g01520.1	Q6ETD9	IQ calmodulin-binding motif family protein	26.0871	26.0073	NaN	27.1776	27.0784	27.0382	26.0871	26.0073	23.62	27.1776	27.0784	27.0382	3	14.1	44.987	0	7.8966	7
LOC_Os02g01720.1	Q6ETC8	transmembrane 120A	28.3702	28.3216	28.0505	28.435	28.7	28.5835	28.3702	28.3216	28.0505	28.435	28.7	28.5835	6	21.2	40.256	0	68.178	20
LOC_Os02g01740.1	B9F1R2	U5 small nuclear ribonucleo200 kDa helicase	28.0694	28.0684	28.2158	28.6146	28.6317	28.6379	28.0694	28.0684	28.2158	28.6146	28.6317	28.6379	20	12.7	246.61	0	84.245	53
LOC_Os02g01960.1	Q6Z901	tetratricopeptide repeat domain containing protein	25.356	25.4936	25.8402	26.6475	26.4267	26.5939	25.356	25.4936	25.8402	26.6475	26.4267	26.5939	5	11.5	64.944	0	10.247	10
LOC_Os02g02000.1	Q6Z8Z7	cytochrome P450	32.0092	31.9953	31.9298	30.4456	30.4134	30.3906	32.0092	31.9953	31.9298	30.4456	30.4134	30.3906	18	46.2	53.71	0	323.31	102
LOC_Os02g02320.1	P37891	OsSCP6 - Putative Serine Carboxypeptidase homologue	25.8245	25.5738	NaN	26.8421	27.8737	26.8243	25.8245	25.5738	22.4573	26.8421	27.8737	26.8243	3	14.2	55.446	0	8.881	4
LOC_Os02g02390.1	Q6Z7B3	S1 RNA binding domain containing protein	26.7704	26.6751	26.745	NaN	NaN	NaN	26.7704	26.6751	26.745	24.1118	24.2967	24.7095	7	13.5	88.252	0	14.695	12
LOC_Os02g02400.2	B7EAG0	catalase isozyme A	29.7467	29.7082	29.6957	29.6063	29.4641	29.3918	29.7467	29.7082	29.6957	29.6063	29.4641	29.3918	11	42.2	56.333	0	69.579	56
LOC_Os02g02410.1	Q6Z7B0	DnaK family protein	29.6223	29.5605	29.782	30.2786	30.3274	30.3378	29.6223	29.5605	29.782	30.2786	30.3274	30.3378	14	30.1	73.389	0	151.47	73
LOC_Os02g02520.1	Q6ZGM0	expressed protein	29.1342	29.0769	29.0534	27.4597	27.6118	27.5251	29.1342	29.0769	29.0534	27.4597	27.6118	27.5251	13	48.8	41.891	0	135.45	38
LOC_Os02g02550.1	Q6ZGL6	peptidyl-prolyl cis-trans isomerase	26.6253	26.5933	26.5723	27.1094	27.168	27.0139	26.6253	26.5933	26.5723	27.1094	27.168	27.0139	3	16.5	25.802	0	9.1054	15
LOC_Os02g02860.1	Q6YUS0	glutamyl-tRNA synthetase	25.5162	25.7068	24.973	NaN	24.0855	NaN	25.5162	25.7068	24.973	24.3983	24.0855	23.3434	2	6.7	62.863	0	8.4445	6
LOC_Os02g02870.1	Q6YUR8	glycine-rich 2	27.9606	27.8923	27.9445	28.9062	28.804	28.9368	27.9606	27.8923	27.9445	28.9062	28.804	28.9368	3	22.4	22.723	0	26.827	21
LOC_Os02g02890.1	Q6ZH98	peptidyl-prolyl cis-trans isomerase	28.2624	28.4781	28.6127	28.6037	28.7972	28.6608	28.2624	28.4781	28.6127	28.6037	28.7972	28.6608	4	25	18.361	0	50.848	23
LOC_Os02g02960.4	Q6ZH90	histone deacetylase complex subunit SAP18	25.5412	25.1219	25.4501	NaN	24.8918	NaN	25.5412	25.1219	25.4501	24.2014	24.8918	23.7554	2	12.5	17.144	0.0011501	2.5092	6
LOC_Os02g03010.1	Q6Z728	expressed protein	30.7338	31.0856	30.8721	29.5017	29.6427	29.5487	30.7338	31.0856	30.8721	29.5017	29.6427	29.5487	4	20.4	29.176	0	137.56	43
LOC_Os02g03250.1	Q6Z703	expressed protein	28.3911	28.6365	28.5671	27.3654	27.3223	27.4536	28.3911	28.6365	28.5671	27.3654	27.3223	27.4536	3	19.3	19.163	0	18.608	15
LOC_Os02g03260.3	Q6Z702	3-isopropylmalate dehydratase large subunit 2	NaN	24.6103	24.1831	24.4187	24.4976	24.5668	24.5017	24.6103	24.1831	24.4187	24.4976	24.5668	2	6.8	48.436	0	6.3578	5
LOC_Os02g03330.1	B7EIQ8	expressed protein	30.2787	29.9947	29.9406	27.9434	28.0018	27.9905	30.2787	29.9947	29.9406	27.9434	28.0018	27.9905	7	20	27.593	0	30.114	40
LOC_Os02g03440.1	Q6Z2M5	LSM domain containing protein	26.3582	26.3135	26.2165	NaN	NaN	NaN	26.3582	26.3135	26.2165	23.9648	24.4352	23.079	2	26.1	10.342	0	5.9869	6
LOC_Os02g03460.1	Q6Z2M3	phosphatidate cytidylyltransferase	25.0117	25.2332	25.1882	25.3432	25.1219	NaN	25.0117	25.2332	25.1882	25.3432	25.1219	23.6628	2	4.4	37.805	0.00029533	2.7072	10
LOC_Os02g03470.1	B9F287	tetratricopeptide repeat containing protein	28.5419	28.7019	28.289	28.8557	29.1643	28.6193	28.5419	28.7019	28.289	28.8557	29.1643	28.6193	7	31.3	34.276	0	195.97	21
LOC_Os02g03540.1	Q6Z2L5	phosphoribosyl transferase	25.604	25.1928	25.8166	26.4738	26.567	26.6455	25.604	25.1928	25.8166	26.4738	26.567	26.6455	2	9.6	42.925	0	13.994	13
LOC_Os02g03670.1	A3A2R7	expressed protein;LOC_Os02g03670.7 LOC_Os02g03670.7	27.6764	27.3879	27.5403	27.8035	27.7513	27.7359	27.6764	27.3879	27.5403	27.8035	27.7513	27.7359	6	25.5	36.11	0	31.506	17
LOC_Os02g03720.1	B9F297	expressed protein	27.0009	26.9181	26.9222	26.5598	26.414	26.3714	27.0009	26.9181	26.9222	26.5598	26.414	26.3714	5	18.9	33.071	0	90.259	19
LOC_Os02g03740.1	Q6Z6Y1	pyridoxal biosynthesis PDX2	25.6032	25.8487	25.7321	27.1811	27.1898	27.1864	25.6032	25.8487	25.7321	27.1811	27.1898	27.1864	3	20.8	27.49	0	27.037	13
LOC_Os02g03860.1	Q6ZG90	mitochondrial ATP synthase precursor	31.324	31.3586	31.1615	31.2385	31.3311	31.2854	31.324	31.3586	31.1615	31.2385	31.3311	31.2854	16	57.1	27.34	0	119.46	78
LOC_Os02g03890.2	A0A0P0VEB3	nuclear transport factor 2	25.9315	26.0557	25.8376	26.1704	26.3929	26.2021	25.9315	26.0557	25.8376	26.1704	26.3929	26.2021	3	11.4	49.261	0	42.497	14
LOC_Os02g04040.1	Q6Z6I4	RecF/RecN/SMC N terminal domain containing protein	NaN	NaN	25.6436	25.9818	26.1315	26.0867	22.2929	23.1713	25.6436	25.9818	26.1315	26.0867	5	11.9	56.695	0	19.035	9
LOC_Os02g04050.1	Q6Z6I4	chromosome segregation protein	25.0127	25.4716	25.1487	NaN	NaN	NaN	25.0127	25.4716	25.1487	24.2177	22.5747	23.6495	5	8.6	79.786	0	11.789	8
LOC_Os02g04100.1	P52428	peptidase	NaN	NaN	NaN	26.7588	26.863	26.7326	23.9847	22.082	23.908	26.7588	26.863	26.7326	2	11.9	29.63	0	20.263	6
LOC_Os02g04460.1	Q0E446	ribosomal L3	29.2009	29.3179	29.2277	28.6985	28.6635	28.6174	29.2009	29.3179	29.2277	28.6985	28.6635	28.6174	7	32.1	28.223	0	76.09	36
LOC_Os02g04480.1	Q6YXY3	cleavage and polyadenylation specificity factor	26.2634	26.4126	26.5202	27.5145	27.3759	27.4016	26.2634	26.4126	26.5202	27.5145	27.3759	27.4016	8	13.4	94.281	0	56.011	27
LOC_Os02g04710.1	Q6Z2X6	cycloartenol synthase	28.356	28.1393	28.3881	28.1488	28.0259	28.3193	28.356	28.1393	28.3881	28.1488	28.0259	28.3193	11	18.6	85.681	0	64.944	41
LOC_Os02g04840.1	Q6YX79	GHMP kinases ATP-binding protein	NaN	NaN	NaN	27.7984	27.9003	27.8156	23.4943	23.0044	24.2228	27.7984	27.9003	27.8156	7	8.6	109.51	0	14.487	14
LOC_Os02g04970.1	Q6YWF9	expressed protein	24.6622	24.5333	24.3683	25.0472	NaN	24.8692	24.6622	24.5333	24.3683	25.0472	24.8344	24.8692	5	6.2	168.87	0	10.171	9
LOC_Os02g05310.4	A3A338	splicing factor 3B subunit 1	27.3848	27.3657	27.2266	27.386	27.4596	27.6229	27.3848	27.3657	27.2266	27.386	27.4596	27.6229	11	11.4	142.26	0	51.439	25
LOC_Os02g05340.1	Q6Z2Z3	proteasome/cyclosome repeat containing protein	27.9488	28.0404	27.8733	28.8485	28.949	28.7833	27.9488	28.0404	27.8733	28.8485	28.949	28.7833	3	11.7	98.157	0	74.935	41
LOC_Os02g06300.1	B9F2U5	GTP-binding lepA	26.9426	26.7003	27.0512	25.9381	26.0288	25.8889	26.9426	26.7003	27.0512	25.9381	26.0288	25.8889	7	11.6	74.036	0	18.121	8
LOC_Os02g06584.2	Q6H7U2	zinc finger C-x8-C-x5-C-x3-H type family protein	26.0485	26.1722	26.1747	26.3415	26.278	26.4728	26.0485	26.1722	26.1747	26.3415	26.278	26.4728	4	7	49.077	0	16.673	15
LOC_Os02g06700.2	Q6H7T1	ribosomal protein	28.9633	28.9515	28.7393	30.0006	29.9197	29.8426	28.9633	28.9515	28.7393	30.0006	29.9197	29.8426	6	34	16.363	0	107.24	29
LOC_Os02g07060.1	P46265	tubulin/FtsZ domain containing protein	31.0982	31.0935	31.0693	30.8446	30.8474	30.8866	31.0982	31.0935	31.0693	30.8446	30.8474	30.8866	1	43	50.105	0	252.63	131
LOC_Os02g07120.1	Q6H4V4	HEAT repeat family protein	28.001	28.3086	28.2376	28.561	28.4804	28.437	28.001	28.3086	28.2376	28.561	28.4804	28.437	14	14.9	134.27	0	37.85	37
LOC_Os02g07220.1	Q6H6D3	peptidyl-prolyl cis-trans isomerase	NaN	NaN	25.2279	25.8126	25.8727	25.971	23.0114	23.2895	25.2279	25.8126	25.8727	25.971	2	14.1	22.22	0	11.227	8
LOC_Os02g07230.3	A0A0P0VFC8	porphobilinogen deaminase	26.8542	26.8906	27.1065	26.6633	26.8346	26.6267	26.8542	26.8906	27.1065	26.6633	26.8346	26.6267	3	18.9	28.517	0	31.556	10
LOC_Os02g07260.2	Q6H6C7	phosphoglycerate kinase protein	30.9096	30.7893	30.9399	30.0733	30.3694	30.3159	30.9096	30.7893	30.9399	30.0733	30.3694	30.3159	11	47.8	42.107	0	111.01	68
LOC_Os02g07350.1	Q6H6B9	inositol-1-monophosphatase	25.5054	25.2148	26.0541	25.1616	25.3266	24.8658	25.5054	25.2148	26.0541	25.1616	25.3266	24.8658	2	12.4	38.91	0	8.3123	13
LOC_Os02g07680.5	Q6H516	cytochrome P450	28.2336	28.1667	28.1625	27.4509	27.4569	27.4829	28.2336	28.1667	28.1625	27.4509	27.4569	27.4829	10	24.9	56.178	0	60.468	32
LOC_Os02g07720.2	Q6H513	cytidylyltransferase domain containing protein	25.3827	25.7973	25.2923	NaN	NaN	25.8199	25.3827	25.7973	25.2923	24.9373	23.8851	25.8199	3	16.2	36.001	0	9.0811	10
LOC_Os02g07870.1	Q6EUQ9	ATP synthase	27.031	27.0236	26.8743	27.5983	27.8065	27.5011	27.031	27.0236	26.8743	27.5983	27.8065	27.5011	6	48.3	68.591	0	41.632	22
LOC_Os02g07890.2	Q6EUQ7	60S ribosomal L27a-3	28.0377	27.8638	28.0075	28.1745	28.316	28.2635	28.0377	27.8638	28.0075	28.1745	28.316	28.2635	1	19.4	15.795	0	32.444	8
LOC_Os02g07910.2	Q6EUQ5	fiber Fb15	29.3695	29.3606	29.3043	29.9779	29.8936	NaN	29.3695	29.3606	29.3043	29.9779	29.8936	24.2283	2	14.7	10.945	0	14.654	11
LOC_Os02g08180.1	P38385	transport SEC61 subunit gamma	NaN	NaN	NaN	27.3563	27.3054	27.327	23.8675	23.3942	23.8915	27.3563	27.3054	27.327	2	23.2	7.667	0	15.735	7
LOC_Os02g08360.1	B9F3E1	RNA recognition motif	28.6118	28.316	28.3677	28.4018	28.4777	28.6145	28.6118	28.316	28.3677	28.4018	28.4777	28.6145	2	2.3	109.17	0	4.9287	6
LOC_Os02g08380.1	Q6ETK1	CR084 protein	28.1642	28.4705	28.1201	29.0945	29.0075	29.1872	28.1642	28.4705	28.1201	29.0945	29.0075	29.1872	7	40.5	20.154	0	39.681	52
LOC_Os02g09150.1	Q6H883	inorganic H+ pyrophosphatase	28.2706	28.1657	27.926	29.6863	29.8623	30.2908	28.2706	28.1657	27.926	29.6863	29.8623	30.2908	3	19	80.178	0	11.688	13
LOC_Os02g09250.1	Q6ZIH1	cytochrome P450 71D10	NaN	NaN	NaN	25.7656	25.9686	25.6491	23.5519	23.8021	23.1075	25.7656	25.9686	25.6491	3	11.7	57.652	0	21.477	10
LOC_Os02g09510.1	Q6ZHS1	limonoid UDP-glucosyltransferase	27.4676	27.567	27.655	28.1971	28.0425	27.9769	27.4676	27.567	27.655	28.1971	28.0425	27.9769	7	23.1	49.549	0	54.287	37
LOC_Os02g09590.1	Q6YUV4	ribosome	27.6177	27.6324	27.3666	27.4079	27.5619	27.3971	27.6177	27.6324	27.3666	27.4079	27.5619	27.3971	4	27.4	16.735	0	19.586	25
LOC_Os02g09750.1	Q6YUU2	lycopene beta cyclase	28.9441	28.9315	28.8863	28.8524	28.7809	28.8504	28.9441	28.9315	28.8863	28.8524	28.7809	28.8504	7	21.1	53.564	0	56.598	29
LOC_Os02g09940.1	Q7F8S5	peroxiredoxin	29.1854	29.2104	29.2158	29.6879	29.8516	29.8271	29.1854	29.2104	29.2158	29.6879	29.8516	29.8271	7	48	23.179	0	104.47	63
LOC_Os11g33240.3	Q2R339	citrate synthase	24.0216	24.1338	NaN	25.7288	25.6734	25.666	24.0216	24.1338	22.6518	25.7288	25.6734	25.666	4	12	48.869	0	9.126	9
LOC_Os02g10080.2	Q7F8R0	zinc finger C-x8-C-x5-C-x3-H type family protein	25.9547	26.2577	25.8602	NaN	NaN	NaN	25.9547	26.2577	25.8602	23.7397	23.9274	23.7959	3	19	23.952	0	16.898	14
LOC_Os02g10120.1	Q6H7Q6	lipoxygenase	28.4076	28.3424	28.1304	27.3254	27.2313	27.0774	28.4076	28.3424	28.1304	27.3254	27.2313	27.0774	11	18.7	103.58	0	47.623	37
LOC_Os02g10260.1	Q6H7M7	outer membrane protein	28.4128	28.4942	28.478	29.0258	28.8972	28.9784	28.4128	28.4942	28.478	29.0258	28.8972	28.9784	14	29.6	71.521	0	68.27	45
LOC_Os02g10390.3	Q6H748	chlorophyll A-B binding protein	35.289	35.1648	35.312	34.0905	34.1626	33.9884	35.289	35.1648	35.312	34.0905	34.1626	33.9884	9	51.3	25.696	0	139.25	253
LOC_Os02g10480.6	Q6H738	stromal membrane-associated protein	NaN	NaN	NaN	26.8706	26.765	26.7029	22.5196	23.3277	23.3624	26.8706	26.765	26.7029	4	16.2	35.25	0	12.159	10
LOC_Os02g10640.1	Q9FXT8	26S protease regulatory subunit	28.8468	28.7164	28.4219	29.1293	28.8222	29.0631	28.8468	28.7164	28.4219	29.1293	28.8222	29.0631	10	42.2	44.586	0	61.939	41
LOC_Os02g10790.1	A0A0P0VG25	expressed protein	24.9439	24.8891	24.669	24.5211	24.528	24.4943	24.9439	24.8891	24.669	24.5211	24.528	24.4943	5	4.5	140.41	0	16.93	9
LOC_Os02g10810.1	Q6ZHU5	of unknown function domain containing protein	27.6989	27.2063	27.2053	NaN	NaN	26.1542	27.6989	27.2063	27.2053	24.0515	24.4043	26.1542	3	37.9	15.505	0	10.972	11
LOC_Os02g11050.1	Q7GCH3	26S protease regulatory subunit	27.8987	28.0846	27.6106	27.2535	27.5653	27.3848	27.8987	28.0846	27.6106	27.2535	27.5653	27.3848	9	34.7	47.222	0	43.107	29
LOC_Os02g11740.1	Q6H8E4	plastidic ATP/ADP-transporter	28.6303	28.5269	28.7339	29.2707	29.5512	29.4251	28.6303	28.5269	28.7339	29.2707	29.5512	29.4251	8	12.5	68.119	0	55.196	32
LOC_Os02g11830.2	Q6H8D6	coatomer subunit beta	27.4532	27.6678	27.6748	28.6825	29.0466	28.7387	27.4532	27.6678	27.6748	28.6825	29.0466	28.7387	7	14.3	102.57	0	61.521	19
LOC_Os02g12650.1	Q6Z6L4	puromycin-sensitive aminopeptidase	NaN	NaN	26.2922	25.8624	26.0108	26.0504	24.5144	24.4678	26.2922	25.8624	26.0108	26.0504	6	8.3	98.452	0	19.945	11
LOC_Os02g12680.1	Q6Z6L1	cytochrome P450	NaN	NaN	NaN	29.9248	29.8047	29.9271	22.8497	24.0162	23.8969	29.9248	29.8047	29.9271	11	32.2	54.438	0	61.842	40
LOC_Os02g12740.1	Q6Z6K3	GPI-anchor transamidase precursor	NaN	24.5221	24.508	24.7517	24.9462	25.0914	22.9474	24.5221	24.508	24.7517	24.9462	25.0914	2	6.9	45.123	0.00029577	2.7142	5
LOC_Os02g12800.2	Q9ZRI7	elongation factor 1-gamma	28.4455	28.5164	28.4789	28.6238	28.6084	28.6738	28.4455	28.5164	28.4789	28.6238	28.6084	28.6738	4	27.8	47.478	0	103.4	34
LOC_Os02g13380.1	O82157	early nodulin 93 ENOD93 protein	25.5453	25.3736	25.4919	26.9461	26.4135	26.2418	25.5453	25.3736	25.4919	26.9461	26.4135	26.2418	3	24	16.43	0	8.0106	8
LOC_Os02g13510.1	Q6H5Y1	receptor-like kinase 5 precursor	24.8039	24.7101	25.1777	24.9588	24.5129	24.6508	24.8039	24.7101	25.1777	24.9588	24.5129	24.6508	3	3.9	110.79	0	4.1838	5
LOC_Os06g36160.1	Q5Z9S4	40S ribosomal S24	27.4446	27.4041	27.0442	NaN	NaN	NaN	27.4446	27.4041	27.0442	24.1665	23.4925	23.8787	2	19.6	15.708	0	5.9693	9
LOC_Os02g13560.4	A3A4S7	transporter family protein	NaN	NaN	NaN	26.1459	26.323	26.1055	23.631	22.8048	23.7343	26.1459	26.323	26.1055	3	6.4	80.108	0	11.342	6
LOC_Os02g13840.1	Q6EUF8	citrate synthase	27.2539	27.3755	27.3386	28.8585	28.8498	28.9727	27.2539	27.3755	27.3386	28.8585	28.8498	28.9727	8	19	54.64	0	99.239	30
LOC_Os02g13970.2	Q6EUK5	Complex I intermediate-associated 30 domain containing protein	29.9146	29.908	30.0233	29.5333	29.6466	29.6483	29.9146	29.908	30.0233	29.5333	29.6466	29.6483	14	37.8	63.848	0	123.73	70
LOC_Os02g13990.1	Q6EUK2	U2 small nuclear ribonucleoA	27.8305	27.8624	27.9031	27.3837	27.5799	27.3331	27.8305	27.8624	27.9031	27.3837	27.5799	27.3331	10	46.5	31.999	0	67.627	30
LOC_Os02g14160.1	Q6EUS1	peroxidase precursor	25.9145	25.7079	25.7788	26.5373	26.5098	26.3206	25.9145	25.7079	25.7788	26.5373	26.5098	26.3206	3	12.8	33.321	0	15.551	9
LOC_Os02g14430.1	Q6ER51	peroxidase precursor	NaN	NaN	NaN	26.7723	26.6183	26.4621	23.0477	22.4172	24.8395	26.7723	26.6183	26.4621	3	22.6	34.427	0	10.938	6
LOC_Os02g14440.1	Q6ER49	peroxidase precursor	30.2655	30.1912	30.0227	29.8148	29.7375	29.7613	30.2655	30.1912	30.0227	29.8148	29.7375	29.7613	4	24.3	34.175	0	95.447	28
LOC_Os02g14780.2	Q6EUD5	splicing factor 3 subunit 1	27.893	27.7753	27.7738	27.4033	27.418	27.6213	27.893	27.7753	27.7738	27.4033	27.418	27.6213	11	21.1	86.961	0	35.527	28
LOC_Os02g15230.3	Q6K4Z3	GDSL-like lipase/acylhydrolase	26.2561	26.2268	25.8092	26.0126	26.6879	26.4807	26.2561	26.2268	25.8092	26.0126	26.6879	26.4807	2	17.5	22.995	0	10.975	11
LOC_Os02g15660.1	A3A568	tetratricopeptide repeat	26.1263	25.9104	25.9338	25.0175	24.5986	24.834	26.1263	25.9104	25.9338	25.0175	24.5986	24.834	4	11.2	85.881	0	27.426	10
LOC_Os02g15750.1	Q6ETQ7	expressed protein	32.4283	32.4525	32.3508	30.1701	30.1375	29.9556	32.4283	32.4525	32.3508	30.1701	30.1375	29.9556	11	30.3	48.402	0	172.96	65
LOC_Os02g15900.1	Q6K241	50S ribosomal L21	28.122	28.2107	28.3727	27.8716	27.825	27.8038	28.122	28.2107	28.3727	27.8716	27.825	27.8038	5	31.8	23.353	0	15.96	14
LOC_Os02g16620.1	Q6ETX5	reticulon domain containing protein	27.7888	27.3253	27.6391	28.2552	28.3301	28.5004	27.7888	27.3253	27.6391	28.2552	28.3301	28.5004	3	24.8	25.146	0	97.003	20
LOC_Os02g16709.1	Q6ERV1	peptidase	27.531	27.4238	27.348	25.8887	25.1493	25.8835	27.531	27.4238	27.348	25.8887	25.1493	25.8835	4	16.8	32.189	0	25.218	11
LOC_Os02g17390.1	S4U008	3-hydroxyacyl-CoA dehydrogenase	27.1316	26.9348	27.2746	30.0729	29.7971	29.92	27.1316	26.9348	27.2746	30.0729	29.7971	29.92	11	19.8	78.46	0	61.304	38
LOC_Os02g17650.1	Q6K7V6	tocopherol cyclase	26.5795	26.6224	26.6385	NaN	26.325	NaN	26.5795	26.6224	26.6385	23.7041	26.325	23.6453	5	18.1	52.194	0	16.763	10
LOC_Os02g17920.1	A3A5J9	glyoxalase family protein	26.1791	26.481	26.3998	25.4797	25.3648	25.5802	26.1791	26.481	26.3998	25.4797	25.3648	25.5802	4	13	41.142	0	9.4173	10
LOC_Os02g18320.1	Q6K4T4	BRASSINOSTEROID INSENSITIVE 1-associated receptor kinase 1 precursor	25.7204	NaN	25.4688	26.5167	26.4389	26.501	25.7204	24.4531	25.4688	26.5167	26.4389	26.501	3	7.9	67.658	0	15.692	11
LOC_Os02g18410.1	Q6K4S7	salt stress root RS1	29.9399	29.8861	29.8153	29.0738	29.0709	28.9815	29.9399	29.8861	29.8153	29.0738	29.0709	28.9815	4	31.5	24.048	0	19.346	22
LOC_Os02g18450.1	Q6KA61	GTP-binding typA/bipA	27.87	28.0273	27.7901	26.697	26.3556	26.4473	27.87	28.0273	27.7901	26.697	26.3556	26.4473	10	22.6	73.51	0	78.424	27
LOC_Os02g18550.1	Q6K8B8	40S ribosomal S3a	25.832	25.8869	26.1936	26.718	26.6016	26.6234	25.832	25.8869	26.1936	26.718	26.6016	26.6234	3	23	29.759	0	6.6081	11
LOC_Os02g19860.1	Q6K4U8	pre-mRNA-splicing factor ATP-dependent RNA helicase	25.3398	NaN	NaN	25.6447	25.6164	25.6659	25.3398	22.4916	21.925	25.6447	25.6164	25.6659	7	7.3	140.05	0	11.125	13
LOC_Os02g19924.1	B7FA99	aminotransferase	24.9185	24.6621	24.622	25.9976	26.0355	25.9736	24.9185	24.6621	24.622	25.9976	26.0355	25.9736	2	4.2	45.289	0	3.6826	9
LOC_Os02g20410.1	Q6K2Y3	GTP binding protein	26.1554	26.2557	26.0637	26.6737	26.7953	26.7572	26.1554	26.2557	26.0637	26.6737	26.7953	26.7572	8	9.7	121.91	0	20.799	17
LOC_Os02g20490.1	Q6Z0W7	expressed protein	26.0999	26.4639	26.5609	NaN	26.1109	NaN	26.0999	26.4639	26.5609	24.2048	26.1109	23.9147	2	13.6	29.184	0	9.1956	7
LOC_Os02g20560.1	Q6Z0V9	fasciclin domain containing protein	26.2805	26.2311	25.9694	NaN	NaN	NaN	26.2805	26.2311	25.9694	24.0529	23.1	23.0459	4	30.6	27.448	0	30.763	13
LOC_Os02g20930.1	Q6Z6S1	apoptosis inhibitor 5	27.3908	27.4015	27.8154	27.3088	27.3867	27.2902	27.3908	27.4015	27.8154	27.3088	27.3867	27.2902	10	22	59.985	0	26.559	29
LOC_Os02g21970.1	Q6Z875	26S protease regulatory subunit 6B	27.2464	27.5011	27.5424	27.2372	27.1263	27.1094	27.2464	27.5011	27.5424	27.2372	27.1263	27.1094	6	26.7	46.454	0	21.855	23
LOC_Os02g22090.1	Q6YWF5	pattern formation EMB30	24.8504	24.7152	24.8125	25.1411	25.2501	25.2027	24.8504	24.7152	24.8125	25.1411	25.2501	25.2027	3	2.9	158.71	0	7.6092	7
LOC_Os02g22260.1	Q6Z6B5	fruit PKIWI502	25.4255	25.2971	25.3157	25.3391	25.2583	25.1831	25.4255	25.2971	25.3157	25.3391	25.2583	25.1831	2	11.1	30.696	0	8.1701	9
LOC_Os02g22780.2	Q6YUK5	T-complex protein	27.9801	28.2304	28.259	28.1537	28.1841	28.1213	27.9801	28.2304	28.259	28.1537	28.1841	28.1213	10	31	54.46	0	70.812	37
LOC_Os02g24134.1	Q6ZGF2	Sec1 family transport protein	NaN	NaN	NaN	24.2424	24.2561	24.4888	23.1322	23.524	22.4637	24.2424	24.2561	24.4888	2	3.5	64.764	0	4.8367	3
LOC_Os10g21374.1	A0A0K0LQN2	chloroplast 30S ribosomal S12	NaN	NaN	27.5662	27.8478	27.7887	27.844	24.255	23.912	27.5662	27.8478	27.7887	27.844	1	10.5	9.5281	0.0042861	1.9676	4
LOC_Os10g38278.1	Q7G7F3	chloroplast 30S ribosomal S2	29.4859	29.7466	29.7818	27.6108	27.3869	27.6743	29.4859	29.7466	29.7818	27.6108	27.3869	27.6743	7	29.7	26.992	0	33.613	27
LOC_Os02g24634.1	Q6Z1U4	photosystem II D2 protein	36.3966	36.5336	36.4377	33.8528	33.3762	33.593	36.3966	36.5336	36.4377	33.8528	33.3762	33.593	8	25.2	39.597	0	323.31	302
LOC_Os02g25060.1	Q6ETC4	NTMC2Type1.2 protein	27.3173	27.3562	27.295	27.7518	27.8855	27.8016	27.3173	27.3562	27.295	27.7518	27.8855	27.8016	9	26.2	61.026	0	20.019	28
LOC_Os02g25580.2	B9EZS5	Sec1 family transport protein	25.3461	NaN	25.5914	26.7217	26.3993	26.495	25.3461	23.3627	25.5914	26.7217	26.3993	26.495	5	11.8	63.844	0	9.5827	11
LOC_Os02g25840.1	Q6K3A8	conserved oligomeric Golgi complex component 4	23.9528	23.8945	23.997	24.9451	24.8139	24.8937	23.9528	23.8945	23.997	24.9451	24.8139	24.8937	3	6.2	61.152	0	5.4756	11
LOC_Os02g26984.1	B9EZX4	expressed protein;LOC_Os03g37320.1 LOC_Os03g37320.1	NaN	NaN	NaN	25.453	25.5027	25.5159	23.3837	23.3701	22.7163	25.453	25.5027	25.5159	2	3.4	63.438	0	14.804	9
LOC_Os02g27030.1	Q6K7A3	cysteine proteinase 1 precursor	27.0057	25.8889	25.8666	29.4765	29.4824	29.3275	27.0057	25.8889	25.8666	29.4765	29.4824	29.3275	7	28.7	40.591	0	37.328	14
LOC_Os04g32710.1	B9FEZ1	40S ribosomal S27	27.1335	27.3365	27.7392	27.3376	27.2041	27.1136	27.1335	27.3365	27.7392	27.3376	27.2041	27.1136	2	34.9	9.5581	0	6.5461	13
LOC_Os02g28980.1	Q6K5Q1	peptidyl-prolyl isomerase	24.5177	24.7241	24.9343	25.2761	24.9539	24.9632	24.5177	24.7241	24.9343	25.2761	24.9539	24.9632	2	6.2	74.809	0	5.4047	9
LOC_Os02g29400.1	Q6K929	expressed protein	26.667	27.1817	26.3992	27.7583	27.5793	27.6978	26.667	27.1817	26.3992	27.7583	27.5793	27.6978	2	18.3	9.6651	0	45.483	8
LOC_Os02g29480.1	Q6K925	RNA-binding protein-like	27.8912	27.8471	27.8167	NaN	25.0048	25.1794	27.8912	27.8471	27.8167	24.6508	25.0048	25.1794	2	14.4	50.879	0	36.59	6
LOC_Os04g30730.1	Q7XMJ1	ribosomal L29	27.4425	27.013	27.4767	25.6189	25.41	25.8567	27.4425	27.013	27.4767	25.6189	25.41	25.8567	2	13.8	14.224	0	4.656	14
LOC_Os02g30230.3	Q6K647	exo70 exocyst complex subunit domain containing protein	25.2617	25.5732	25.0755	26.0717	26.2104	25.6901	25.2617	25.5732	25.0755	26.0717	26.2104	25.6901	5	12.6	75.711	0	18.522	12
LOC_Os02g30460.1	Q6K2G7	uncharacterized MJ0304	27.8443	27.8824	27.9411	28.6068	28.4763	28.5002	27.8443	27.8824	27.9411	28.6068	28.4763	28.5002	5	22.5	27.498	0	62.402	30
LOC_Os02g30630.2	Q0E0Z3	thiamine pyrophosphate enzyme	26.4822	26.4438	27.0909	25.0783	25.185	25.1293	26.4822	26.4438	27.0909	25.0783	25.185	25.1293	7	14.9	69.392	0	26.017	20
LOC_Os02g32030.1	Q6H4L2	elongation factor	30.4983	30.6103	30.7595	30.2219	30.4522	30.5829	30.4983	30.6103	30.7595	30.2219	30.4522	30.5829	16	31.4	94.02	0	228.08	102
LOC_Os02g32120.1	Q6H4M9	cytochrome b-c1 complex subunit Rieske	29.6269	29.7561	29.7466	30.8402	30.7799	30.7028	29.6269	29.7561	29.7466	30.8402	30.7799	30.7028	6	32	29.82	0	210.25	44
LOC_Os02g32160.1	Q6H563	copine	26.3876	26.2813	26.5675	27.3032	27.3271	27.4126	26.3876	26.2813	26.5675	27.3032	27.3271	27.4126	6	16.6	63.83	0	41.362	18
LOC_Os02g32350.2	Q6H547	TUDOR with multiple SNc domains	28.6825	28.8388	28.6971	28.9567	28.9166	28.9404	28.6825	28.8388	28.6971	28.9567	28.9166	28.9404	20	29.9	108.18	0	67.823	57
LOC_Os02g32520.1	Q6H795	ERD1 protein	23.3911	23.3709	23.2386	32.4358	32.4724	32.4871	23.3911	23.3709	23.2386	32.4358	32.4724	32.4871	21	34	101.88	0	323.31	109
LOC_Os02g32530.1	B9F0B8	SAM domain family protein	27.4492	27.0177	27.3935	26.934	26.8312	26.6724	27.4492	27.0177	27.3935	26.934	26.8312	26.6724	2	14.5	18.493	0	22.754	12
LOC_Os02g32930.1	Q6ESG1	bile acid sodium symporter	26.3626	26.3386	26.3483	NaN	NaN	NaN	26.3626	26.3386	26.3483	24.1286	23.7092	23.4588	2	6.9	44.482	0	30.285	7
LOC_Os02g33010.1	A0A0P0VK15	expressed protein	27.5469	27.7495	27.7132	27.1696	27.1571	27.4418	27.5469	27.7495	27.7132	27.1696	27.1571	27.4418	5	11.2	59.52	0	77.395	18
LOC_Os02g33110.2	Q0E0P0	glycosyl hydrolases	25.628	25.5411	25.4097	25.3713	25.5947	25.3496	25.628	25.5411	25.4097	25.3713	25.5947	25.3496	4	11.6	57.434	0	6.9106	9
LOC_Os02g33450.2	Q6ER94	peroxiredoxin	29.5638	29.8801	29.7041	29.905	30.0105	30.0706	29.5638	29.8801	29.7041	29.905	30.0105	30.0706	9	42.1	28.097	0	173.18	54
LOC_Os02g33490.1	Q6ER91	inorganic H+ pyrophosphatase	26.0337	26.1765	26.1842	27.4595	27.4743	27.3406	26.0337	26.1765	26.1842	27.4595	27.4743	27.3406	4	7	84.71	0	22.436	12
LOC_Os02g33500.1	Q6ER90	threonyl-tRNA synthetase	25.9131	25.2373	25.8572	27.6215	27.4078	27.6903	25.9131	25.2373	25.8572	27.6215	27.4078	27.6903	8	13.8	76.937	0	28.495	20
LOC_Os02g33610.2	B9F0F0	metallo-beta-lactamase	25.3878	25.1213	25.4544	26.7387	26.5848	26.7902	25.3878	25.1213	25.4544	26.7387	26.5848	26.7902	5	10.2	77.801	0	10.569	13
LOC_Os04g35090.1	P0DKK9	40S ribosomal S10	29.1645	29.1012	29.137	29.9266	29.9742	29.9203	29.1645	29.1012	29.137	29.9266	29.9742	29.9203	4	28.4	20.263	0	24.734	34
LOC_Os12g07140.2	Q2QX54	expressed protein;LOC_Os11g06890.2 LOC_Os11g06890.2	28.2871	28.2654	28.1662	28.4733	28.8805	28.6875	28.2871	28.2654	28.1662	28.4733	28.8805	28.6875	1	15.4	12.758	0	16.043	10
LOC_Os02g34810.1	Q69SV0	OsAPx8 - Thylakoid-bound Ascorbate Peroxidase encoding gene 5	32.5398	32.4069	32.5151	30.779	30.5806	30.4734	32.5398	32.4069	32.5151	30.779	30.5806	30.4734	16	49.2	51.187	0	157.08	123
LOC_Os02g34884.1	Q69SU0	SacI homology domain containing protein	26.9111	27.1346	27.1721	27.4106	27.3861	27.332	26.9111	27.1346	27.1721	27.4106	27.3861	27.332	7	15.7	67.873	0	26.975	25
LOC_Os02g35039.1	Q6ZI86	NAD dependent epimerase/dehydratase family protein	25.7473	26.0602	25.8048	26.5005	26.4075	26.5923	25.7473	26.0602	25.8048	26.5005	26.4075	26.5923	4	21.2	31.206	0	10.031	9
LOC_Os02g35090.1	Q6ZI79	expressed protein	29.1996	29.5349	29.3168	28.7101	28.6194	28.7387	29.1996	29.5349	29.3168	28.7101	28.6194	28.7387	4	35.7	24.022	0	15.397	20
LOC_Os02g35170.2	Q0E0D3	uncharacterized oxidoreductase yoxD	26.1395	26.2337	26.0479	26.6094	26.7066	26.6315	26.1395	26.2337	26.0479	26.6094	26.7066	26.6315	5	24	23.438	0	12.689	13
LOC_Os02g35190.2	Q6YVX5	chloride channel protein	24.9673	24.8265	NaN	25.5652	25.7082	25.6738	24.9673	24.8265	24.6761	25.5652	25.7082	25.6738	2	4.1	86.989	0	12.712	5
LOC_Os02g35470.4	Q6YU05	calmodulin binding protein	26.3866	26.5122	26.4329	26.6112	26.7281	26.5209	26.3866	26.5122	26.4329	26.6112	26.7281	26.5209	5	9.8	72.104	0	10.886	13
LOC_Os02g35590.2	Q0GKV1	glutathione S-transferase	26.8566	26.8293	26.8696	27.8311	27.908	27.6527	26.8566	26.8293	26.8696	27.8311	27.908	27.6527	5	25.8	24.86	0	49.641	28
LOC_Os02g36570.1	Q69S79	ABC1 family domain containing protein	28.7478	28.8031	29.0751	27.5948	27.6882	27.7214	28.7478	28.8031	29.0751	27.5948	27.6882	27.7214	12	17.6	86.178	0	88.544	39
LOC_Os02g36850.1	Q6EP57	oxygen evolving enhancer 3	30.0256	30.2732	30.3584	29.9399	29.6124	29.6428	30.0256	30.2732	30.3584	29.9399	29.6124	29.6428	5	25.3	24.463	0	113.04	28
LOC_Os02g36974.4	Q6EUP4	14-3-3 protein	28.1178	28.0161	27.9632	28.8105	28.6636	28.6683	28.1178	28.0161	27.9632	28.8105	28.6636	28.6683	4	52.7	29.692	0	21.629	19
LOC_Os02g37040.1	Q6EP35	peptide transporter PTR3-A	25.4457	25.561	25.3806	24.6619	24.9212	NaN	25.4457	25.561	25.3806	24.6619	24.9212	23.2731	4	9.4	64.675	0	11.517	5
LOC_Os02g37420.1	Q6YY17	ras-related protein	29.6003	29.6183	29.5531	30.4948	30.4915	30.5814	29.6003	29.6183	29.5531	30.4948	30.4915	30.5814	4	52.4	23.017	0	177.17	41
LOC_Os04g39444.1	Q7XQN4	LSM domain containing protein	26.6886	27.4502	27.1359	NaN	NaN	NaN	26.6886	27.4502	27.1359	23.3367	23.765	24.854	2	27.2	12.626	0	66.967	13
LOC_Os02g37590.1	Q6YY47	glycerophosphoryl diester phosphodiesterase family protein	26.8937	27.0605	26.9093	27.7602	27.6802	27.9248	26.8937	27.0605	26.9093	27.7602	27.6802	27.9248	7	14.2	81.083	0	42.897	19
LOC_Os02g37690.1	Q6YY41	UDP-glucoronosyl and UDP-glucosyl transferase	27.2508	27.2924	27.3494	27.3482	27.2139	27.4051	27.2508	27.2924	27.3494	27.3482	27.2139	27.4051	5	18.6	46.106	0	34.81	20
LOC_Os02g37862.1	Q6YY64	60S ribosomal L6	28.3884	28.1465	28.867	28.5943	28.333	28.6517	28.3884	28.1465	28.867	28.5943	28.333	28.6517	4	32.4	24.258	0	14.957	19
LOC_Os02g38200.1	Q6ZI55	dehydrogenase	26.7694	26.2862	26.8723	27.9139	27.87	27.981	26.7694	26.2862	26.8723	27.9139	27.87	27.981	4	24.9	40.628	0	22.835	20
LOC_Os02g38210.1	Q6ZI53	elongation factor Tu	34.3566	34.1524	34.2351	34.5699	34.4087	34.4115	34.3566	34.1524	34.2351	34.5699	34.4087	34.4115	19	56.5	50.413	0	323.31	365
LOC_Os02g38240.1	Q6ZI49	rhodanese family protein	29.5324	29.2575	29.0809	27.754	27.7207	27.4865	29.5324	29.2575	29.0809	27.754	27.7207	27.4865	5	24	32.16	0	43.834	20
LOC_Os02g38300.1	Q6K912	SNF7 domain containing protein	27.7268	27.561	27.4895	27.32	27.6306	27.3451	27.7268	27.561	27.4895	27.32	27.6306	27.3451	6	38.2	25.468	0	16.318	12
LOC_Os02g38440.1	A3A8P2	oxidoreductase	25.0277	24.9695	24.9344	25.6571	25.6435	25.5735	25.0277	24.9695	24.9344	25.6571	25.6435	25.5735	4	20	35.555	0	17.912	7
LOC_Os02g38820.1	Q6K5H8	expressed protein	30.5374	30.587	30.6368	30.412	30.385	30.4205	30.5374	30.587	30.6368	30.412	30.385	30.4205	7	35.3	29.77	0	93.151	44
LOC_Os02g38920.1	Q6K5G8	glyceraldehyde-3-phosphate dehydrogenase	NaN	NaN	25.4363	25.4856	25.7137	25.6028	23.2005	22.9934	25.4363	25.4856	25.7137	25.6028	3	34.4	36.567	0	6.2739	5
LOC_Os02g39160.1	Q6K8J4	hydroxymethylbutenyl 4-diphosphate synthase	25.6146	25.8028	25.6372	25.0928	24.9184	24.6958	25.6146	25.8028	25.6372	25.0928	24.9184	24.6958	3	6.7	82.16	0	12.114	11
LOC_Os02g39340.1	Q6K8R1	glycine-rich protein	26.4096	26.6044	26.3367	26.5899	26.8794	27.0523	26.4096	26.6044	26.3367	26.5899	26.8794	27.0523	4	22.4	28.336	0	17.637	12
LOC_Os02g39550.3	Q6K1Y0	calcium-binding mitochondrial anon-60Da	25.751	26.0414	25.6252	27.3294	27.3935	27.2464	25.751	26.0414	25.6252	27.3294	27.3935	27.2464	8	13.6	84.05	0	24.301	20
LOC_Os02g39600.1	Q6K1X5	outer envelope protein	31.6132	31.6178	31.6092	31.5001	31.4713	31.3298	31.6132	31.6178	31.6092	31.5001	31.4713	31.3298	20	65.4	41.075	0	239.26	150
LOC_Os02g39730.1	Q6K9C2	expressed protein;LOC_Os02g39730.2 LOC_Os02g39730.2	28.2728	28.2968	28.2212	26.3108	26.1708	26.4621	28.2728	28.2968	28.2212	26.3108	26.1708	26.4621	3	22	13.951	0	35.508	12
LOC_Os02g39740.1	Q6K9C1	psaB translation factor	28.0035	27.9629	27.5451	25.7463	26.0739	25.6106	28.0035	27.9629	27.5451	25.7463	26.0739	25.6106	3	15.8	42.69	0	36.034	12
LOC_Os02g39870.1	Q6K635	co-chaperone GrpE protein	24.8369	25.1377	25.0362	24.6676	24.9753	25.1144	24.8369	25.1377	25.0362	24.6676	24.9753	25.1144	3	12	36.557	0	5.3898	6
LOC_Os02g39920.1	Q6K624	AT hook motif family protein	24.6762	24.6782	24.7975	NaN	NaN	NaN	24.6762	24.6782	24.7975	24.2501	24.0819	24.4095	2	3	81.357	0	3.6856	4
LOC_Os02g39930.1	Q6K623	OsTIL-1 Temperature-induced lipocalin-1	27.5869	28.2428	27.8926	29.7045	30.5555	29.9557	27.5869	28.2428	27.8926	29.7045	30.5555	29.9557	3	25.1	22.221	0	36.662	19
LOC_Os02g40240.2	Q6K7X0	receptor kinase	28.2606	27.4563	27.4131	26.7674	26.5559	26.6713	28.2606	27.4563	27.4131	26.7674	26.5559	26.6713	5	4.8	109.69	0	67.768	10
LOC_Os02g40830.2	S4TZU3	succinyl-CoA ligase beta-chain	25.1229	NaN	24.9042	25.3685	25.4057	25.6848	25.1229	24.6291	24.9042	25.3685	25.4057	25.6848	3	10.3	44.635	0	13.592	8
LOC_Os04g43540.1	Q7X752	ribosomal L14	28.3855	28.4545	28.4581	28.2691	28.1891	28.1254	28.3855	28.4545	28.4581	28.2691	28.1891	28.1254	2	13.4	15.415	0	6.197	17
LOC_Os02g41590.1	Q0DZE5	kinase	26.1146	26.3084	26.2064	27.8116	27.8565	27.8355	26.1146	26.3084	26.2064	27.8116	27.8565	27.8355	6	24.6	36.993	0	19.09	20
LOC_Os02g41630.2	P14717	phenylalanine ammonia-lyase	26.6943	26.9543	27.0411	27.7253	27.6794	27.5942	26.6943	26.9543	27.0411	27.7253	27.6794	27.5942	6	16.5	75.497	0	26.677	17
LOC_Os02g41860.3	Q6K215	aquaporin protein	32.2394	32.3768	32.2803	32.7768	32.6869	32.7216	32.2394	32.3768	32.2803	32.7768	32.6869	32.7216	5	22.1	28.328	0	104.64	53
LOC_Os02g42290.3	Q6H7I9	OsClp3 - Putative Clp protease homologue	28.6053	28.5976	28.5081	29.7342	29.63	29.7578	28.6053	28.5976	28.5081	29.7342	29.63	29.7578	3	13.1	31.96	0	36.363	21
LOC_Os02g42320.4	Q6H852	peptidase	NaN	NaN	NaN	26.349	27.1258	26.7028	23.4837	23.9335	24.0756	26.349	27.1258	26.7028	2	20.5	16.419	0	20.325	5
LOC_Os03g12000.1	Q10PV9	DEAD-box ATP-dependent RNA helicase	25.5717	25.4479	25.2185	25.6464	25.106	NaN	25.5717	25.4479	25.2185	25.6464	25.106	23.698	4	7.5	62.918	0	8.3126	6
LOC_Os02g42700.1	Q6H7E4	thioredoxin	26.6225	26.4406	26.5605	26.0728	26.3103	26.2226	26.6225	26.4406	26.5605	26.0728	26.3103	26.2226	2	25.4	18.589	0	40.792	8
LOC_Os02g42940.1	Q6H7R1	MSP domain containing protein	26.0152	26.1394	26.3284	26.3581	27.121	26.3913	26.0152	26.1394	26.3284	26.3581	27.121	26.3913	5	25.1	28.511	0	7.4148	10
LOC_Os02g42960.1	Q6H667	thylakoid lumenal protein	28.5564	28.5071	28.6134	28.253	28.0309	28.3151	28.5564	28.5071	28.6134	28.253	28.0309	28.3151	5	31.8	28.96	0	102.26	32
LOC_Os02g43340.2	Q6H6S1	hydrolase	25.7873	25.7731	25.6307	24.7506	NaN	24.7738	25.7873	25.7731	25.6307	24.7506	23.0896	24.7738	3	13.9	48.165	0	18.042	9
LOC_Os02g43350.1	Q6H6R9	OsFtsH7 FtsH protease	26.6438	26.7005	26.9077	27.4923	27.4426	27.4446	26.6438	26.7005	26.9077	27.4923	27.4426	27.4446	10	15.7	87.918	0	45.85	23
LOC_Os02g43500.1	Q6H3Y3	OR	26.8141	27.0062	27.1344	24.7814	24.8041	24.7766	26.8141	27.0062	27.1344	24.7814	24.8041	24.7766	3	9.9	35.378	0	52.57	9
LOC_Os02g43600.1	Q6H8H3	50S ribosomal L19	29.2334	29.0347	29.474	26.6085	26.6617	26.8758	29.2334	29.0347	29.474	26.6085	26.6617	26.8758	2	10.3	25.505	0	19.224	14
LOC_Os02g43690.1	Q6H8G2	ras-related protein	29.7951	29.6155	29.4947	29.6047	29.6473	29.6063	29.7951	29.6155	29.4947	29.6047	29.6473	29.6063	4	48.8	22.504	0	26.464	35
LOC_Os02g44510.1	Q6ESI8	UDP-glucose glycoglucosyltransferase 1 precursor	25.8819	25.8144	25.8073	27.2287	27.2316	27.0226	25.8819	25.8144	25.8073	27.2287	27.2316	27.0226	5	8.7	74.998	0	12.604	16
LOC_Os02g44520.1	Q6ESI7	OsSub19 - Putative Subtilisin homologue	NaN	NaN	26.2051	27.4795	27.3148	26.9242	23.0378	22.9793	26.2051	27.4795	27.3148	26.9242	5	6.8	148.63	0	22	9
LOC_Os02g44630.2	B7SDI4	aquaporin protein	32.1863	32.1929	32.2217	32.699	32.6829	32.7613	32.1863	32.1929	32.2217	32.699	32.6829	32.7613	5	22.1	30.759	0	24.414	48
LOC_Os02g44780.3	Q6ET88	polyprenyl synthetase	27.3975	27.2191	27.1393	25.6663	25.7854	25.6911	27.3975	27.2191	27.1393	25.6663	25.7854	25.6911	5	17.8	35.96	0	16.94	19
LOC_Os02g45070.2	B9F1L3	PINHEAD	26.7478	26.6223	26.6869	26.3163	26.4673	26.3433	26.7478	26.6223	26.6869	26.3163	26.4673	26.3433	7	11	118.64	0	26.023	18
LOC_Os02g45460.1	Q6EP75	expressed protein	28.1733	28.3148	28.2787	27.6462	27.7859	27.8235	28.1733	28.3148	28.2787	27.6462	27.7859	27.8235	5	29.3	27.177	0	82.859	26
LOC_Os02g45650.1	Q6EPN8	peptidase	27.6535	27.7094	27.7094	26.1743	25.8417	26.1028	27.6535	27.7094	27.7094	26.1743	25.8417	26.1028	7	22.1	48.437	0	19.2	14
LOC_Os02g46130.1	Q6ZHC3	tRNA synthetases class II domain containing protein	26.683	26.5739	26.8083	27.3004	27.2311	27.3163	26.683	26.5739	26.8083	27.3004	27.2311	27.3163	5	12	60.862	0	15.057	17
LOC_Os02g46510.1	Q6ZGX8	adaptor complexes medium subunit family domain containing protein	26.1761	26.0775	26.3201	27.6951	27.7282	27.5668	26.1761	26.0775	26.3201	27.6951	27.7282	27.5668	4	10	49.27	0	26.826	14
LOC_Os02g46750.1	A0A0P0VN99	expressed protein;LOC_Os02g46750.5 LOC_Os02g46750.5	24.529	24.5687	NaN	24.6458	24.5301	24.5716	24.529	24.5687	24.5044	24.6458	24.5301	24.5716	3	9	45.615	0	9.9095	6
LOC_Os02g46962.3	Q6YUH7	VHS and GAT domain containing protein	25.3461	25.7364	25.9583	27.1746	27.6204	27.605	25.3461	25.7364	25.9583	27.1746	27.6204	27.605	2	15.3	43.606	0	19.092	13
LOC_Os02g46990.1	Q6Z8F7	AAA-type ATPase family protein	27.1762	27.2747	27.3438	27.4572	27.2544	27.2824	27.1762	27.2747	27.3438	27.4572	27.2544	27.2824	2	10.5	71.267	0	34.83	20
LOC_Os02g47020.1	Q6Z8F4	phosphoribulokinase/Uridine kinase family protein	29.9258	29.7808	29.7937	29.1382	29.1195	29.0254	29.9258	29.7808	29.7937	29.1382	29.1195	29.0254	12	37.5	44.864	0	55.532	57
LOC_Os04g50990.1	Q0JAI2	L11 domain containing ribosomal protein	30.5596	30.679	30.5566	30.4489	30.5196	30.5352	30.5596	30.679	30.5566	30.4489	30.5196	30.5352	5	41	17.747	0	107.73	41
LOC_Os02g47200.1	Q8W855	transposon protein	26.6776	26.7062	NaN	26.7882	27.0161	26.7802	26.6776	26.7062	23.7613	26.7882	27.0161	26.7802	6	19.7	37.886	0	13.085	18
LOC_Os02g47310.1	Q6ZIK0	Cyclopropane-fatty-acyl-phospholipid synthase	27.4878	27.6894	27.5415	26.9261	27.3355	27.3605	27.4878	27.6894	27.5415	26.9261	27.3355	27.3605	6	21.5	39.671	0	24.935	21
LOC_Os02g47320.1	Q6ZHJ9	vacuolar ATPase G subunit	NaN	NaN	NaN	26.6165	26.286	25.8698	23.3637	23.398	24.1719	26.6165	26.286	25.8698	1	8.2	21.783	0.0022284	2.2427	3
LOC_Os02g47510.1	Q6YVJ0	9-cis-epoxycarotenoid dioxygenase 1	27.6756	27.7349	27.5649	NaN	NaN	NaN	27.6756	27.7349	27.5649	23.1516	23.6792	23.6466	6	14.6	68.619	0	48.21	19
LOC_Os02g47620.3	A3AAI9	hydrolase	27.7049	27.6507	27.7005	NaN	26.3604	NaN	27.7049	27.6507	27.7005	24.6692	26.3604	23.9498	4	27	41.655	0	63.943	19
LOC_Os02g47650.1	Q6Z2G8	universal stress domain containing protein	NaN	NaN	NaN	28.5385	28.6256	28.5653	22.5729	24.2021	24.5289	28.5385	28.6256	28.5653	6	37.5	20.448	0	22.13	18
LOC_Os02g47800.1	Q8S3R2	monodehydroascorbate reductase	29.5496	29.791	29.611	29.9276	29.8454	29.6336	29.5496	29.791	29.611	29.9276	29.8454	29.6336	15	34.5	51.863	0	141.26	60
LOC_Os02g47840.1	Q8S3R7	universal stress domain containing protein	24.6689	24.5635	24.6837	26.1904	26.1674	27.6764	24.6689	24.5635	24.6837	26.1904	26.1674	27.6764	3	15.3	19.875	0	4.9131	7
LOC_Os02g47850.2	Q6YV23	class I glutamine amidotransferase	26.5491	26.7085	26.3314	27.6838	27.6223	27.5627	26.5491	26.7085	26.3314	27.6838	27.6223	27.5627	6	15.7	48.435	0	15.088	23
LOC_Os02g47860.2	Q6YV21	uridine kinase	26.3791	26.3675	26.1339	26.7598	26.6146	26.6464	26.3791	26.3675	26.1339	26.7598	26.6146	26.6464	7	14.4	73.535	0	17.911	14
LOC_Os02g48010.1	Q7XXP7	nuclear matrix constituent 1-like	27.1995	27.0404	26.9467	27.6874	27.6377	27.7479	27.1995	27.0404	26.9467	27.6874	27.6377	27.7479	9	9.3	132.33	0	30.838	36
LOC_Os02g48110.1	Q6ZFX8	DnaK family protein	25.0356	24.5694	NaN	26.0743	26.1991	25.8987	25.0356	24.5694	23.5919	26.0743	26.1991	25.8987	6	8.5	99.369	0	10.316	12
LOC_Os02g48480.1	Q6ZHP6	expressed protein	28.9992	28.6582	28.7618	28.8056	28.8333	28.95	28.9992	28.6582	28.7618	28.8056	28.8333	28.95	3	32.7	10.426	0	33.172	18
LOC_Os02g48560.6	Q6ZGW6	fatty acid desaturase	27.4483	27.3612	27.4645	NaN	NaN	NaN	27.4483	27.3612	27.4645	23.2481	24.3943	24.0042	2	8.9	43.82	0	7.9939	5
LOC_Os02g48720.2	Q0DY33	mitochondrial carrier protein	32.5896	32.6667	32.7299	32.4467	32.1145	32.3496	32.5896	32.6667	32.7299	32.4467	32.1145	32.3496	8	26.2	41.51	0	126.62	103
LOC_Os02g48790.4	B9F2E2	AML1	NaN	NaN	NaN	24.4616	24.7877	24.6024	23.3645	23.0527	24.9042	24.4616	24.7877	24.6024	2	2.7	91.434	0	4.5859	5
LOC_Os02g48900.2	Q6Z670	aspartic proteinase nepenthesin-1 precursor	28.3192	28.5369	28.6918	29.327	29.16	29.2658	28.3192	28.5369	28.6918	29.327	29.16	29.2658	7	37.5	34.409	0	24.162	35
LOC_Os02g49050.2	Q6Z656	transmembrane 9 superfamily member	26.0874	26.0629	25.7236	25.4291	25.2918	25.3493	26.0874	26.0629	25.7236	25.4291	25.2918	25.3493	5	11.2	74.129	0	34.007	15
LOC_Os02g49090.1	Q6Z5M6	WD domain	26.5393	26.3252	26.345	26.5132	26.732	26.4882	26.5393	26.3252	26.345	26.5132	26.732	26.4882	4	7.2	144.62	0	13.213	14
LOC_Os02g49320.1	B7EW17	sucrase-related	28.1997	29.2764	28.1294	28.0113	27.8302	28.2442	28.1997	29.2764	28.1294	28.0113	27.8302	28.2442	7	22.5	46.645	0	86.388	29
LOC_Os02g49326.1	Q6Z5K4	SET domain-containing protein	27.6708	27.3341	28.0049	26.6532	26.0846	25.792	27.6708	27.3341	28.0049	26.6532	26.0846	25.792	9	24.9	56.348	0	21.891	20
LOC_Os02g49570.1	Q6Z329	OsProtIV1 - Putative Protease IV homologue;Domain 2 is a SPH	28.3623	28.4211	28.2227	27.3578	26.9079	27.2215	28.3623	28.4211	28.2227	27.3578	26.9079	27.2215	8	17.4	74.203	0	32.065	20
LOC_Os02g49680.1	Q6YWR8	arsenate reductase	32.1607	32.1456	32.0789	30.2975	30.3179	30.3258	32.1607	32.1456	32.0789	30.2975	30.3179	30.3258	12	41.9	39.308	0	152.94	56
LOC_Os02g49870.2	Q6Z2L1	expressed protein;LOC_Os02g49870.1 LOC_Os02g49870.1	31.6359	31.7553	31.5478	30.4112	30.5101	30.4057	31.6359	31.7553	31.5478	30.4112	30.5101	30.4057	5	22	16.95	0	100.1	36
LOC_Os02g49980.1	Q6Z2K0	ADP-ribosylation factor	27.4926	27.5983	27.7773	27.0061	28.2094	26.8771	27.4926	27.5983	27.7773	27.0061	28.2094	26.8771	4	27.2	20.62	0	15.379	14
LOC_Os02g50100.1	Q6Z2I7	SET domain-containing protein	25.7949	26.1448	26.4555	26.1812	26.4335	26.2298	25.7949	26.1448	26.4555	26.1812	26.4335	26.2298	5	13.6	52.637	0	13.715	15
LOC_Os02g50230.1	Q6Z754	peptidase	26.7344	26.9922	27.1733	27.1176	27.0763	27.0602	26.7344	26.9922	27.1733	27.1176	27.0763	27.0602	5	16.5	49.858	0	26.313	22
LOC_Os02g50240.1	P14656	glutamine synthetase	25.064	25.1537	25.0962	25.3383	25.5509	25.3864	25.064	25.1537	25.0962	25.3383	25.5509	25.3864	2	15.7	39.201	0	36.461	6
LOC_Os02g50550.1	Q0DXR0	dynamin	24.9999	25.2655	25.2301	NaN	25.9111	25.8308	24.9999	25.2655	25.2301	23.855	25.9111	25.8308	4	21.6	100.39	0	13.481	11
LOC_Os02g50620.1	Q6Z5N4	dehydrogenase E1 component domain containing protein	25.3144	25.333	25.4487	25.6202	25.4507	25.4768	25.3144	25.333	25.4487	25.6202	25.4507	25.4768	4	12.6	42.701	0	7.0624	7
LOC_Os02g50790.1	B9F2X6	nuclear-pore anchor	24.8844	NaN	NaN	25.1321	24.8935	25.0038	24.8844	23.8345	22.443	25.1321	24.8935	25.0038	3	4.4	120.79	0	8.8064	9
LOC_Os02g50799.1	Q6Z7R9	nuclear-pore anchor	25.3769	25.4898	25.2651	25.932	25.9613	25.8142	25.3769	25.4898	25.2651	25.932	25.9613	25.8142	5	11.2	56.634	0	11.235	5
LOC_Os02g51020.1	Q6Z2U3	expressed protein	30.1067	30.0435	30.0552	26.8846	26.8582	27.1051	30.1067	30.0435	30.0552	26.8846	26.8582	27.1051	6	34.3	20.484	0	189.35	30
LOC_Os02g51070.1	D0TZP8	starch synthase	26.1641	26.0928	26.0245	26.2776	25.9631	25.8856	26.1641	26.0928	26.0245	26.2776	25.9631	25.8856	4	11.8	75.622	0	11.51	11
LOC_Os02g51080.1	U5LY03	FAD binding domain containing protein	32.6822	32.6668	32.7169	31.0683	31.166	30.9448	32.6822	32.6668	32.7169	31.0683	31.166	30.9448	19	47.9	50.586	0	235.35	108
LOC_Os02g51100.1	B9F2Z5	arsenical pump-driving ATPase	28.3624	28.3273	28.1795	28.6155	28.5561	28.7437	28.3624	28.3273	28.1795	28.6155	28.5561	28.7437	9	33.6	42.498	0	51.033	36
LOC_Os02g51450.2	Q6Z8L0	mTERF family protein	24.5258	24.5194	24.4645	NaN	NaN	NaN	24.5258	24.5194	24.4645	23.5524	24.0929	25.3061	3	9.8	43.868	0	5.0779	4
LOC_Os02g51470.3	Q6Z8K7	ATP synthase F1	33.241	33.2138	33.084	32.3652	32.1739	32.0364	33.241	33.2138	33.084	32.3652	32.1739	32.0364	13	75.7	26.217	0	323.31	160
LOC_Os02g51570.1	Q6Z8J5	peptidyl-prolyl cis-trans isomerase	29.7385	29.9717	29.7853	28.7407	29.0215	28.8285	29.7385	29.9717	29.7853	28.7407	29.0215	28.8285	6	31.3	23.446	0	24.807	35
LOC_Os02g51710.1	Q6ZGP5	wound/stress protein	25.5004	25.3983	25.2039	25.5535	25.0853	25.5527	25.5004	25.3983	25.2039	25.5535	25.0853	25.5527	1	15.5	19.986	0	4.4239	9
LOC_Os02g51750.1	Q6Z6A7	annexin	NaN	NaN	NaN	26.0592	25.9803	26.0825	23.435	23.0163	23.8033	26.0592	25.9803	26.0825	2	8.6	35.554	0	12.226	4
LOC_Os02g51790.1	Q6Z6A0	ribosomal L29	27.0134	27.1101	27.2793	NaN	25.6817	NaN	27.0134	27.1101	27.2793	24.4098	25.6817	24.4275	3	20.6	18.332	0	10.018	14
LOC_Os02g51930.1	A0A0P0VPM6	cytokinin-O-glucosyltransferase 2	NaN	NaN	NaN	25.39	25.2924	25.2831	23.2399	21.929	24.1756	25.39	25.2924	25.2831	3	8.2	53.456	0	6.6903	8
LOC_Os02g52314.1	Q6K8D2	BTB1 - Bric-a-Brac	NaN	NaN	NaN	27.1725	27.156	27.0737	23.3792	23.8548	22.0586	27.1725	27.156	27.0737	2	18.5	17.221	0	19.607	12
LOC_Os02g52390.1	B9F342	M16 domain containing zinc peptidase	28.8017	28.6745	28.8418	28.8047	28.8042	28.6871	28.8017	28.6745	28.8418	28.8047	28.8042	28.6871	14	19.9	121.21	0	84.257	57
LOC_Os02g52650.1	Q6Z7Q1	chlorophyll A-B binding protein	27.5429	27.3454	27.8078	NaN	NaN	NaN	27.5429	27.3454	27.8078	25.0499	23.4094	23.9356	4	32.6	27.895	0	7.1727	11
LOC_Os02g52860.1	O80414	phosphate carrier protein	29.4626	29.5177	29.3896	30.6495	30.0312	30.3049	29.4626	29.5177	29.3896	30.6495	30.0312	30.3049	3	22.6	38.959	0	9.835	25
LOC_Os02g52880.2	Q6Z302	ybaK/prolyl-tRNA synthetase family protein	25.6324	25.861	25.8353	25.9097	25.7595	25.8123	25.6324	25.861	25.8353	25.9097	25.7595	25.8123	4	17.8	34.915	0	5.9152	10
LOC_Os02g52940.2	Q6ZGJ8	soluble inorganic pyrophosphatase	26.1286	26.3626	26.0259	25.9777	25.9761	26.161	26.1286	26.3626	26.0259	25.9777	25.9761	26.161	3	11.2	31.781	0	9.0127	12
LOC_Os02g53060.1	Q9LST9	peptidase	24.8045	24.8604	24.9647	26.1247	26.1599	26.1828	24.8045	24.8604	24.9647	26.1247	26.1599	26.1828	1	17.5	26.273	0	21.899	9
LOC_Os02g53400.1	Q6Z7L3	thioredoxin	26.8919	26.9492	26.8583	26.5235	26.6174	26.509	26.8919	26.9492	26.8583	26.5235	26.6174	26.509	4	21.2	21.232	0	6.7728	9
LOC_Os02g53420.1	Q6Z7L1	DnaK family protein	28.173	28.4415	28.2137	28.5555	28.6279	28.7042	28.173	28.4415	28.2137	28.5555	28.6279	28.7042	11	21.2	72.897	0	56.756	38
LOC_Os02g53770.1	Q6ZGC2	tRNA synthetase class I	27.3971	27.3996	27.4168	27.226	27.185	27.3193	27.3971	27.3996	27.4168	27.226	27.185	27.3193	10	14.7	118.36	0	23.648	26
LOC_Os02g54254.2	E3WF37	saccharopine dehydrogenase	23.5956	25.3159	NaN	29.5002	28.9673	29.2424	23.5956	25.3159	24.5378	29.5002	28.9673	29.2424	18	18.8	114.4	0	46.421	42
LOC_Os06g09290.1	P0DKK0	26S protease regulatory subunit 7	27.533	27.3623	27.2975	27.9725	27.892	27.9251	27.533	27.3623	27.2975	27.9725	27.892	27.9251	10	31.9	47.682	0	63.17	37
LOC_Os02g54650.1	Q6K4P5	diacylglycerol kinase	26.5547	26.1912	26.4074	27.022	27.129	27.1653	26.5547	26.1912	26.4074	27.022	27.129	27.1653	3	7.4	53.977	0	6.7645	21
LOC_Os02g54700.2	Q6K4P1	RNA recognition motif containing protein	26.4792	26.5886	26.7609	26.828	27.0685	26.6927	26.4792	26.5886	26.7609	26.828	27.0685	26.6927	5	31.5	32.009	0	43.989	12
LOC_Os02g54770.2	Q6K4N0	RNA recognition motif containing protein	26.0492	26.0652	26.0458	NaN	26.1522	26.0985	26.0492	26.0652	26.0458	24.449	26.1522	26.0985	4	24.9	21.023	0	8.8966	12
LOC_Os02g54820.2	A3AC56	trehalose-6-phosphate synthase	25.8445	26.207	26.2043	27.6431	27.6767	27.8123	25.8445	26.207	26.2043	27.6431	27.6767	27.8123	8	13.9	93.882	0	29.192	20
LOC_Os02g54980.1	Q6K689	pheophorbide a oxygenase	30.5591	30.5839	30.2459	31.1545	31.1648	31.1915	30.5591	30.5839	30.2459	31.1545	31.1648	31.1915	14	38.4	60.011	0	153.58	94
LOC_Os02g55120.1	B9F3Z9	translation initiation factor IF-3	25.3966	25.934	25.2525	24.5453	23.7013	NaN	25.3966	25.934	25.2525	24.5453	23.7013	23.9783	3	9.8	34.355	0	4.7126	9
LOC_Os02g55140.1	Q6K669	leucine aminopeptidase	25.9635	26.203	25.981	26.7344	26.5309	26.545	25.9635	26.203	25.981	26.7344	26.5309	26.545	5	13.5	61.818	0	32.93	16
LOC_Os02g55420.1	Q6KAJ2	aminotransferase	26.9985	26.9374	26.9814	27.2223	27.2006	27.1883	26.9985	26.9374	26.9814	27.2223	27.2006	27.1883	6	14.2	50.35	0	19.869	17
LOC_Os02g55440.2	Q69R01	transmembrane 9 superfamily member	28.235	28.1693	28.0957	28.5622	28.3119	28.3746	28.235	28.1693	28.0957	28.5622	28.3119	28.3746	6	11.7	74.134	0	34.066	26
LOC_Os02g55630.1	Q69IK7	COBW domain containing protein	29.7848	29.8253	29.9442	30.1209	30.0811	30.041	29.7848	29.8253	29.9442	30.1209	30.0811	30.041	10	27.5	49.166	0	130.91	49
LOC_Os02g55880.1	Q69II5	EF hand family protein	NaN	NaN	NaN	25.9597	25.9119	25.7557	22.9319	23.6454	22.856	25.9597	25.9119	25.7557	3	23.4	20.205	0	21.211	9
LOC_Os02g56000.1	P46465	26S protease regulatory subunit 6A	27.4589	27.5825	27.3161	28.0735	27.9618	28.0158	27.4589	27.5825	27.3161	28.0735	27.9618	28.0158	9	36.6	47.797	0	59.973	36
LOC_Os02g56040.1	Q6K850	chaperone dnaJ	28.6781	28.6624	28.7415	28.244	28.5389	28.1044	28.6781	28.6624	28.7415	28.244	28.5389	28.1044	7	21.6	52.017	0	59.237	28
LOC_Os10g32920.1	Q9AV77	ribosomal protein	27.5252	27.6327	27.529	27.2512	27.5041	27.4186	27.5252	27.6327	27.529	27.2512	27.5041	27.4186	4	32.1	15.031	0	10.406	17
LOC_Os02g56970.1	Q6K8N9	uncharacterized yqjG	27.1292	NaN	27.1896	26.9887	27.1305	26.9702	27.1292	22.5739	27.1896	26.9887	27.1305	26.9702	5	18.8	43.908	0	16.671	11
LOC_Os02g57020.1	Q6K6C3	YCF37	28.6215	28.6419	28.6751	28.5867	28.589	28.8129	28.6215	28.6419	28.6751	28.5867	28.589	28.8129	2	17.6	15.71	0	25.152	25
LOC_Os02g57030.1	Q6K6C2	expressed protein;LOC_Os02g57030.2 LOC_Os02g57030.2	28.9583	29.0461	29.1407	27.3259	27.9233	27.4744	28.9583	29.0461	29.1407	27.3259	27.9233	27.4744	5	29.3	33.155	0	33.669	31
LOC_Os02g57160.1	Q6K6A6	ELMO/CED-12 family protein	25.9552	26.5836	26.3273	23.5916	23.0964	NaN	25.9552	26.5836	26.3273	23.5916	23.0964	24.3059	5	8	86.619	0	9.2964	10
LOC_Os02g57180.1	Q6K6A4	NADH dehydrogenase 1 alpha subcomplex subunit 9	30.5049	30.5325	30.6782	30.8841	31.0101	30.7723	30.5049	30.5325	30.6782	30.8841	31.0101	30.7723	14	45.3	44.309	0	127.11	55
LOC_Os02g57240.1	Q40648	oxidoreductase	NaN	24.6959	NaN	25.727	25.7339	26.3787	23.8923	24.6959	23.4095	25.727	25.7339	26.3787	4	11	36.449	0	9.1298	8
LOC_Os02g57260.1	Q84P96	3-ketoacyl-CoA thiolase	29.3139	29.217	29.2487	30.9224	30.9341	30.865	29.3139	29.217	29.2487	30.9224	30.9341	30.865	13	42	46.829	0	169.29	77
LOC_Os02g57280.1	Q6K9S2	CBS domain containing membrane protein	27.272	27.1669	27.2474	27.835	27.7167	27.7954	27.272	27.1669	27.2474	27.835	27.7167	27.7954	5	34.4	22.928	0	13.735	21
LOC_Os02g57590.1	Q6K701	rRNA 2-O-methyltransferase fibrillarin 2	28.0336	28.1388	27.7247	26.0223	26.1453	26.2117	28.0336	28.1388	27.7247	26.0223	26.1453	26.2117	5	19.9	32.403	0	43.451	24
LOC_Os02g57640.1	Q6K6Z4	KH domain containing protein	NaN	NaN	NaN	26.5618	26.6703	26.5439	23.455	23.2603	23.7972	26.5618	26.6703	26.5439	4	15.7	36.718	0	28.961	9
LOC_Os02g57670.1	Q6KA00	ribosomal L9	30.3785	30.4107	30.4352	29.4545	29.3331	29.5137	30.3785	30.4107	30.4352	29.4545	29.3331	29.5137	6	35.8	20.784	0	18.903	23
LOC_Os04g05080.1	Q6KAA4	vacuolar ATP synthase subunit F	NaN	NaN	NaN	27.1389	26.993	26.9567	24.7834	23.6157	24.081	27.1389	26.993	26.9567	2	25.5	5.8596	0	7.2947	7
LOC_Os02g58020.3	Q6K7R4	ABC transporter	26.1482	26.3681	26.28	27.4591	27.3085	27.293	26.1482	26.3681	26.28	27.4591	27.3085	27.293	4	7.9	64.787	0	27.812	9
LOC_Os02g58310.3	Q6K9T4	expressed protein;LOC_Os02g58310.1 LOC_Os02g58310.1	27.4481	27.3965	27.2081	27.9656	27.6081	27.6282	27.4481	27.3965	27.2081	27.9656	27.6081	27.6282	3	23.6	22.881	0	36.06	28
LOC_Os02g58340.1	Q6K9T1	oligopeptidase	28.2434	28.2383	28.3795	28.0793	28.1568	27.9973	28.2434	28.2383	28.3795	28.0793	28.1568	27.9973	13	25.2	86.217	0	53.437	44
LOC_Os02g58480.1	Q6K973	sucrose synthase	25.7773	25.5754	25.2461	27.0103	26.7291	26.6458	25.7773	25.5754	25.2461	27.0103	26.7291	26.6458	3	6.4	96.152	0	11.198	12
LOC_Os02g58510.1	Q6K969	GHMP kinases ATP-binding protein	28.1911	28.2987	28.4094	28.5717	28.7475	28.3598	28.1911	28.2987	28.4094	28.5717	28.7475	28.3598	7	35.4	37.812	0	42.367	31
LOC_Os02g58550.2	Q6K965	chloroplast channel forming outer membrane protein	28.1983	28.1634	28.0486	27.742	27.6094	27.7777	28.1983	28.1634	28.0486	27.742	27.6094	27.7777	4	28.6	20.948	0	42.445	20
LOC_Os02g58590.1	Q6K959	N-acetylglucosaminyltransferase I	27.2821	27.2554	27.3639	27.644	27.7599	27.7498	27.2821	27.2554	27.3639	27.644	27.7599	27.7498	9	23.3	51.506	0	18.072	20
LOC_Os02g58640.1	Q6ESB7	tumor susceptibility gene 101	24.4973	24.9925	24.9074	NaN	25.2541	25.2359	24.4973	24.9925	24.9074	23.3125	25.2541	25.2359	4	12.7	43.735	0	11.664	6
LOC_Os02g58650.1	Q6ESB6	expressed protein	27.7044	27.6837	27.7243	27.7668	27.9615	27.8951	27.7044	27.6837	27.7243	27.7668	27.9615	27.8951	5	19.9	36.931	0	24.141	16
LOC_Os02g58790.1	Q6EP22	cell division inhibitor	29.0014	28.9124	28.8476	29.1233	29.1784	29.2492	29.0014	28.9124	28.8476	29.1233	29.1784	29.2492	6	21.7	38.812	0	21.719	24
LOC_Os03g01750.5	Q10SY1	dual specificity phosphatase	25.7548	26.0062	26.0335	26.5386	26.795	26.657	25.7548	26.0062	26.0335	26.5386	26.795	26.657	3	8.5	38.375	0	5.9904	11
LOC_Os03g01920.1	Q10SV7	expressed protein	26.8289	27.0996	27.2963	25.3909	25.3504	25.3252	26.8289	27.0996	27.2963	25.3909	25.3504	25.3252	3	13.6	37.808	0	11.36	8
LOC_Os03g02040.1	Q10SU0	remorin	28.5012	28.212	28.4777	28.6172	28.4852	28.2313	28.5012	28.212	28.4777	28.6172	28.4852	28.2313	5	31.4	19.533	0	31.938	20
LOC_Os03g02150.2	Q10SS5	adapitin protein	27.9849	28.0449	28.024	28.897	28.9269	28.9315	27.9849	28.0449	28.024	28.897	28.9269	28.9315	13	19	103.6	0	49.215	54
LOC_Os03g02390.1	Q8GZW5	mitochondrial import inner membrane translocase subunit Tim17	NaN	NaN	NaN	26.813	26.4465	26.3746	23.0695	23.4485	23.7581	26.813	26.4465	26.3746	2	27.8	20.406	0	5.3324	9
LOC_Os03g02590.4	Q10SM7	peroxisomal biogenesis factor 11	29.9496	30.2242	30.7813	27.7653	28.1142	28.2449	29.9496	30.2242	30.7813	27.7653	28.1142	28.2449	4	22.8	26.425	0	8.5077	17
LOC_Os03g02640.1	Q10SM2	methylthioribose kinase	27.7725	28.5141	27.7466	26.5769	26.3725	26.6694	27.7725	28.5141	27.7466	26.5769	26.3725	26.6694	2	7.6	37.82	0	9.2986	13
LOC_Os03g02960.1	Q8LMR3	nascent polypeptide-associated complex subunit alpha	25.6752	25.9226	25.9025	25.7376	25.8946	25.9201	25.6752	25.9226	25.9025	25.7376	25.8946	25.9201	2	33.9	23.724	0	19.492	16
LOC_Os03g03020.1	Q9AYT6	L11 domain containing ribosomal protein	30.1413	29.8924	29.8087	27.8323	27.6411	27.6871	30.1413	29.8924	29.8087	27.8323	27.6411	27.6871	5	27.1	21.955	0	11.179	17
LOC_Os03g03360.1	Q9ZST0	ribosomal L5	30.4508	30.2799	30.3052	29.1048	28.9903	28.9889	30.4508	30.2799	30.3052	29.1048	28.9903	28.9889	10	45.5	30.219	0	70.052	56
LOC_Os03g03450.2	Q10SD5	anthranilate phosphoribosyltransferase	26.674	26.8716	26.7025	27.5292	27.4717	27.4647	26.674	26.8716	26.7025	27.5292	27.4717	27.4647	7	26.2	40.51	0	55.47	23
LOC_Os03g03600.1	Q8S5V0	fasciclin-like arabinogalactan protein	26.0376	25.8847	25.8799	25.7782	26.0789	25.885	26.0376	25.8847	25.8799	25.7782	26.0789	25.885	3	12.2	41.96	0	6.568	9
LOC_Os03g03720.1	Q9SNK3	glyceraldehyde-3-phosphate dehydrogenase	34.1698	34.1212	34.1028	33.8299	33.6077	33.734	34.1698	34.1212	34.1028	33.8299	33.6077	33.734	12	37.6	47.11	0	277.97	148
LOC_Os03g03770.1	Q0DVH3	expressed protein	27.3187	27.0817	27.0403	28.9914	29.2066	29.1432	27.3187	27.0817	27.0403	28.9914	29.2066	29.1432	5	60.6	12.189	0	14.163	15
LOC_Os03g03910.1	Q10S82	catalase domain containing protein	30.6698	30.5853	30.705	32.2751	32.256	32.2039	30.6698	30.5853	30.705	32.2751	32.256	32.2039	13	40.9	56.763	0	228.68	105
LOC_Os03g03949.2	Q10S76	electron carrier/ disulfide oxidoreductase	26.2305	26.5918	26.6413	NaN	NaN	NaN	26.2305	26.5918	26.6413	23.8126	23.4732	23.9824	2	7.8	39.712	0	8.7059	8
LOC_Os03g03990.1	Q8LSQ2	signal recognition particle 43 kDa protein	27.9698	27.7766	28.0039	27.7933	28.1207	28.0489	27.9698	27.7766	28.0039	27.7933	28.1207	28.0489	6	20.6	42.138	0	56.17	26
LOC_Os03g04000.1	Q10S72	AMP-binding domain containing protein	26.3	25.9195	26.1748	26.3671	26.3561	26.581	26.3	25.9195	26.1748	26.3671	26.3561	26.581	4	12.3	59.865	0	27.893	13
LOC_Os03g04050.1	Q10S67	kinase family protein	25.8209	25.8163	25.7442	27.0056	27.2485	27.2238	25.8209	25.8163	25.7442	27.0056	27.2485	27.2238	3	15.6	59.376	0	22.13	12
LOC_Os03g04110.2	Q8H8C7	lysM domain-containing GPI-anchored precursor	26.8045	27.1263	26.5487	28.9898	28.8865	28.8919	26.8045	27.1263	26.5487	28.9898	28.8865	28.8919	3	12.2	36.694	0	17.526	19
LOC_Os03g04220.1	Q8H8D6	glutathione S-transferase	28.9636	28.8424	28.7976	29.0097	29.2333	28.7381	28.9636	28.8424	28.7976	29.0097	29.2333	28.7381	9	32.3	35.704	0	94.629	48
LOC_Os03g04240.1	Q8H8D8	glutathione S-transferase	27.996	28.1183	28.0503	NaN	27.3643	NaN	27.996	28.1183	28.0503	23.7837	27.3643	24.4427	3	27.1	25.657	0	115.66	15
LOC_Os03g04260.1	Q8H8E0	glutathione S-transferase	26.7083	26.4913	26.651	25.9739	25.8669	26.2381	26.7083	26.4913	26.651	25.9739	25.8669	26.2381	4	21.9	24.989	0	16.755	15
LOC_Os03g04410.1	Q10S34	aconitate hydratase protein	25.8635	25.5804	25.6914	27.1131	27.0235	27.0888	25.8635	25.5804	25.6914	27.1131	27.0235	27.0888	8	12.6	106.3	0	16.183	21
LOC_Os03g04440.2	Q10S29	expressed protein;LOC_Os03g04440.1 LOC_Os03g04440.1	NaN	NaN	NaN	25.7651	25.6174	25.7392	24.5701	24.1914	24.6049	25.7651	25.6174	25.7392	3	21.7	23.479	0	20.25	9
LOC_Os03g04460.1	Q10S27	outer mitochondrial membrane porin	27.1763	27.3941	27.3493	28.5181	28.4439	28.2024	27.1763	27.3941	27.3493	28.5181	28.4439	28.2024	8	41.7	29.683	0	35.717	23
LOC_Os03g04750.1	Q10RZ3	60S ribosomal L21-2	29.0006	28.5634	28.9053	25.9998	26.3805	27.3265	29.0006	28.5634	28.9053	25.9998	26.3805	27.3265	2	31.1	18.699	0	49.006	13
LOC_Os03g05310.1	Q10RT5	pheophorbide a oxygenase	27.6853	27.9463	27.921	28.9221	29.3894	29.3728	27.6853	27.9463	27.921	28.9221	29.3894	29.3728	11	28.1	72.76	0	71.6	45
LOC_Os03g05320.2	Q10RT4	expressed protein;LOC_Os03g05320.1 LOC_Os03g05320.1	25.9582	25.6587	NaN	25.8714	26.1929	26.3409	25.9582	25.6587	22.577	25.8714	26.1929	26.3409	3	13.9	25.438	0	24.012	17
LOC_Os03g05520.1	Q8H080	nicotiana lesion-inducing like	24.3125	NaN	24.2629	24.6674	25.0336	24.614	24.3125	23.4029	24.2629	24.6674	25.0336	24.614	3	21	17.304	0	4.4922	6
LOC_Os03g05730.1	Q10RP0	cell division control 48 homolog E	28.7319	28.7593	28.8691	29.6611	29.5596	29.5994	28.7319	28.7593	28.8691	29.6611	29.5596	29.5994	2	28.8	89.743	0	125.36	71
LOC_Os03g05740.1	Q10RN9	ras-related protein	26.3673	26.6046	26.5933	27.2803	27.6899	27.6295	26.3673	26.6046	26.5933	27.2803	27.6899	27.6295	3	23.1	21.648	0	13.194	8
LOC_Os03g05780.1	Q0DV32	4-coumarate--CoA ligase-like 7	NaN	23.779	NaN	23.9625	23.7939	23.672	22.2596	23.779	22.5563	23.9625	23.7939	23.672	2	3.6	58.971	0.0019713	2.3231	4
LOC_Os03g05920.1	Q10RL6	expressed protein	NaN	25.9124	NaN	26.7629	27.2467	27.0573	23.4934	25.9124	22.3582	26.7629	27.2467	27.0573	5	14.3	43.611	0	16.779	11
LOC_Os11g38959.1	Q2R1J8	40S ribosomal S9-2	28.2629	28.4971	28.412	29.656	29.6207	29.8032	28.2629	28.4971	28.412	29.656	29.6207	29.8032	5	26.7	22.673	0	97.547	20
LOC_Os03g06200.1	Q8LMR0	aminotransferase	25.1946	25.28	NaN	26.3814	25.6205	25.6964	25.1946	25.28	23.5665	26.3814	25.6205	25.6964	4	12	44.931	0	11.263	9
LOC_Os03g06220.1	Q10RI7	DEAD-box ATP-dependent RNA helicase	25.4598	25.4926	NaN	26.0812	25.9665	26.4517	25.4598	25.4926	23.5726	26.0812	25.9665	26.4517	3	7.5	55.854	0	6.6407	5
LOC_Os03g06230.1	Q10RI6	galactose mutarotase-like	31.6312	31.4408	31.345	30.1482	30.0734	30.1308	31.6312	31.4408	31.345	30.1482	30.0734	30.1308	11	38.4	38.135	0	192.78	48
LOC_Os03g06720.1	Q10RD6	expressed protein	28.2702	28.3001	28.102	27.5797	27.8893	27.7853	28.2702	28.3001	28.102	27.5797	27.8893	27.7853	7	9.8	96.456	0	49.682	28
LOC_Os03g07190.1	Q8S7U4	expressed protein	NaN	NaN	NaN	27.835	27.7651	27.8446	24.4541	23.2347	24.8094	27.835	27.7651	27.8446	5	23	28.804	0	19.805	15
LOC_Os03g07300.1	Q9ZTP5	ribulose-phosphate 3-epimerase	29.5839	29.5562	29.539	30.0285	29.9595	29.9224	29.5839	29.5562	29.539	30.0285	29.9595	29.9224	3	20.8	29.034	0	31.903	20
LOC_Os03g07440.1	Q8S7W8	putativ eribonuclease P	29.7081	29.7815	29.6262	28.3825	28.2698	28.2665	29.7081	29.7815	29.6262	28.3825	28.2698	28.2665	4	15.7	19.235	0	116.04	22
LOC_Os03g07480.4	Q10R54	sucrose transporter	NaN	NaN	NaN	25.1153	24.9346	25.1407	22.5611	23.2788	22.7969	25.1153	24.9346	25.1407	4	16.6	47.668	0	6.5318	4
LOC_Os03g07580.1	Q10R44	OsNucAP1 - Putative Nucleoporin Autopeptidase homologue	26.2641	26.0965	26.2195	26.8341	26.9306	26.5742	26.2641	26.0965	26.2195	26.8341	26.9306	26.5742	6	8	113.57	0	18.144	11
LOC_Os03g07960.1	B9FBM2	expressed protein	29.2783	29.2351	29.5506	28.3104	27.8567	28.0866	29.2783	29.2351	29.5506	28.3104	27.8567	28.0866	5	31.6	24.773	0	68.796	24
LOC_Os03g08050.1	Q10QZ6	elongation factor Tu	34.5215	34.4917	34.3424	34.2412	34.0803	34.3207	34.5215	34.4917	34.3424	34.2412	34.0803	34.3207	14	42.7	49.292	0	192.18	195
LOC_Os03g08070.3	Q10QZ3	copper-transporting ATPase PAA1	25.9456	25.6969	25.9155	NaN	NaN	NaN	25.9456	25.6969	25.9155	24.509	23.7823	23.8888	3	6.4	64.432	0	9.7849	7
LOC_Os03g08280.2	Q9LSU3	peptidase	25.899	26.0012	26.1222	26.1315	26.1124	26.1283	25.899	26.0012	26.1222	26.1315	26.1124	26.1283	4	23.2	27.573	0	9.0511	10
LOC_Os03g08360.1	Q10QW1	3-ketoacyl-CoA synthase 10	26.623	26.7747	26.805	25.6425	25.4833	NaN	26.623	26.7747	26.805	25.6425	25.4833	23.6121	6	15.9	60.108	0	31.187	14
LOC_Os03g08440.2	Q10QU8	ribosomal S2	28.3578	28.3339	28.3034	29.9813	30.0592	30.137	28.3578	28.3339	28.3034	29.9813	30.0592	30.137	5	24.2	29.857	0	95.298	30
LOC_Os03g08450.1	Q94HF1	eukaryotic translation initiation factor 3 subunit K	27.2771	27.1001	27.2904	27.8954	27.6992	27.9323	27.2771	27.1001	27.2904	27.8954	27.6992	27.9323	6	28.3	25.831	0	10.823	24
LOC_Os03g08480.2	Q0DUJ6	rho termination factor	26.6074	26.6091	26.3128	27.4213	27.2376	27.0537	26.6074	26.6091	26.3128	27.4213	27.2376	27.0537	4	16.3	41.764	0	14.003	20
LOC_Os03g08570.1	Q0DUI8	amine oxidase	30.2679	30.3631	30.2318	28.645	28.4409	28.4863	30.2679	30.3631	30.2318	28.645	28.4409	28.4863	17	38.6	64.769	0	87.002	66
LOC_Os03g08624.1	Q94HG6	dihydroflavonol-4-reductase	NaN	NaN	NaN	25.9141	25.7135	25.8461	23.8573	23.7939	23.7027	25.9141	25.7135	25.8461	2	6.5	36.876	0	10.826	5
LOC_Os03g08790.1	Q6F4N5	aspartic proteinase nepenthesin precursor	25.624	25.6641	25.6837	26.0393	26.0447	25.8808	25.624	25.6641	25.6837	26.0393	26.0447	25.8808	3	9.4	45.077	0	6.6699	14
LOC_Os03g08860.1	Q8H7P4	GRAM domain containing protein	NaN	NaN	NaN	25.3286	25.4278	25.4536	23.6126	23.0553	23.9093	25.3286	25.4278	25.4536	2	9.8	28.374	0	8.6303	6
LOC_Os03g09020.1	Q8H7N0	dehydrogenase	25.6626	26.0912	25.6947	NaN	NaN	NaN	25.6626	26.0912	25.6947	23.3311	23.7304	25.1433	3	13.3	38.843	0	22.386	7
LOC_Os03g09100.1	Q10QM9	calmodulin-binding transcription activator	NaN	NaN	NaN	25.3837	25.3955	25.4424	24.7862	23.0268	23.0825	25.3837	25.3955	25.4424	4	7.3	115	0	8.8053	5
LOC_Os03g09110.1	Q10QM8	mitochondrial carrier protein	NaN	NaN	NaN	24.1345	24.018	23.9948	23.5399	24.0581	23.747	24.1345	24.018	23.9948	3	10.2	45.11	0	8.3953	4
LOC_Os03g09210.1	Q10QL6	NADH dehydrogenase 1 alpha subcomplex subunit 13	28.9364	28.9138	28.9193	29.8181	29.9063	29.8421	28.9364	28.9138	28.9193	29.8181	29.9063	29.8421	4	31.7	15.958	0	86.543	39
LOC_Os03g09900.1	Q8H7W7	membrane protein	NaN	NaN	NaN	27.9281	27.0955	27.006	22.4129	24.0267	21.5729	27.9281	27.0955	27.006	2	8.3	41.057	0	8.994	8
LOC_Os03g10060.1	Q10QH0	S10/S20 domain containing ribosomal protein	NaN	NaN	NaN	25.9052	25.4889	26.1273	23.3278	22.763	24.3463	25.9052	25.4889	26.1273	3	21.6	19.986	0	6.0083	4
LOC_Os03g10120.3	Q10QG2	proteasome subunit	25.4848	24.8718	25.5123	25.5405	25.4465	25.549	25.4848	24.8718	25.5123	25.5405	25.4465	25.549	5	18.4	40.927	0	21.93	8
LOC_Os03g10340.1	P49397	40S ribosomal S3a	28.273	28.4264	28.4131	28.5643	28.4371	28.5019	28.273	28.4264	28.4131	28.5643	28.4371	28.5019	3	22.9	29.727	0	76.744	32
LOC_Os03g10370.1	Q10QD5	ADP-ribosylation factor	28.1071	27.9093	28.0379	28.2142	28.2813	28.1259	28.1071	27.9093	28.0379	28.2142	28.2813	28.1259	4	29.3	20.709	0	10.605	18
LOC_Os03g10510.1	Q84P97	outer mitochondrial membrane porin	31.175	31.1715	31.145	32.2277	32.2494	32.3477	31.175	31.1715	31.145	32.2277	32.2494	32.3477	15	52.3	29.474	0	144.11	136
LOC_Os03g10620.3	Q10QA5	hydrolase	24.1864	24.1393	24.3566	25.641	25.8204	25.9747	24.1864	24.1393	24.3566	25.641	25.8204	25.9747	3	9.4	33.508	0	5.5295	10
LOC_Os03g10880.1	Q8H069	BTBN5 - Bric-a-Brac	26.9275	26.8621	27.057	25.8175	26.0361	26.1389	26.9275	26.8621	27.057	25.8175	26.0361	26.1389	7	21.2	68.021	0	29.291	15
LOC_Os03g11200.1	Q10Q44	pre-mRNA-processing factor 39	26.0256	26.0159	25.635	26.6337	26.5324	26.6457	26.0256	26.0159	25.635	26.6337	26.5324	26.6457	3	4.2	87.193	0	14.773	15
LOC_Os03g11360.3	B9F655	leucine rich repeat containing protein	NaN	NaN	NaN	25.5819	25.6929	25.8162	23.5957	21.9552	23.2818	25.5819	25.6929	25.8162	3	25.1	24.187	0	6.6646	7
LOC_Os03g11410.1	Q10Q21	mitochondrial-processing peptidase subunit	31.7431	31.7355	31.7646	31.9933	31.9607	31.991	31.7431	31.7355	31.7646	31.9933	31.9607	31.991	15	39	58.751	0	184.96	115
LOC_Os03g11570.1	Q10Q05	proteasome subunit	27.5405	27.8196	27.9465	27.8986	27.9768	27.9621	27.5405	27.8196	27.9465	27.8986	27.9768	27.9621	3	22.3	43.669	0	55.307	22
LOC_Os03g11670.1	Q10PZ4	pentatricopeptide repeat domain containing protein	25.7999	26.1121	25.7753	NaN	NaN	NaN	25.7999	26.1121	25.7753	22.9547	23.9547	24.3746	3	6.4	73.345	0	18.062	6
LOC_Os03g11720.1	B9F676	glycosyl hydrolase	NaN	24.7173	25.1092	26.27	26.6513	25.6339	24.0786	24.7173	25.1092	26.27	26.6513	25.6339	4	6.2	103.21	0	10.075	9
LOC_Os03g11900.1	Q10PW9	transporter family protein	25.8147	25.3159	25.0558	27.7659	29.5217	29.1496	25.8147	25.3159	25.0558	27.7659	29.5217	29.1496	5	10.3	56.774	0	39.856	12
LOC_Os03g11970.1	Q10PW2	tubulin/FtsZ domain containing protein	24.3283	24.2057	NaN	25.3057	25.9102	25.1671	24.3283	24.2057	23.7413	25.3057	25.9102	25.1671	2	11.6	50.06	0	2.9885	4
LOC_Os03g12020.1	Q10PV6	50S ribosomal L15	29.3368	29.3176	29.3275	28.4361	28.353	28.4447	29.3368	29.3176	29.3275	28.4361	28.353	28.4447	8	30.8	27.877	0	51.615	42
LOC_Os03g12250.1	Q8H811	atypical receptor-like kinase MARK	28.4281	28.4516	28.4014	28.6719	28.7334	28.8025	28.4281	28.4516	28.4014	28.6719	28.7334	28.8025	10	23.6	70.751	0	88.301	33
LOC_Os03g12300.1	Q10PS3	HEAT repeat family protein	25.7592	25.4878	25.8325	26.1452	26.3123	26.2528	25.7592	25.4878	25.8325	26.1452	26.3123	26.2528	7	14.1	80.013	0	36.734	18
LOC_Os03g12360.2	Q8H7S6	trehalose-6-phosphate synthase	NaN	NaN	NaN	24.267	24.4605	24.1233	23.2963	22.8651	23.0564	24.267	24.4605	24.1233	3	4.3	96.634	0	5.1993	4
LOC_Os03g12500.1	Q7XYS3	cytochrome P450	24.4529	24.5633	24.5681	29.5029	29.344	29.0988	24.4529	24.5633	24.5681	29.5029	29.344	29.0988	10	24.5	52.27	0	54.978	29
LOC_Os03g12510.1	O04985	non-symbiotic hemoglobin 2	25.8237	25.9546	26.0081	25.6715	25.498	25.8944	25.8237	25.9546	26.0081	25.6715	25.498	25.8944	2	11.8	18.615	0	3.7423	8
LOC_Os03g12530.1	Q10PP8	cation efflux family protein	27.3639	26.8049	27.1532	NaN	NaN	NaN	27.3639	26.8049	27.1532	23.5486	23.5798	23.6113	4	11.6	44.703	0	10.827	5
LOC_Os03g12590.1	B7EEW9	coatomer subunit gamma-1	26.6796	26.657	26.6455	27.2543	26.7886	27.2405	26.6796	26.657	26.6455	27.2543	26.7886	27.2405	6	14.5	99.988	0	33.147	25
LOC_Os03g12890.5	Q10PK7	aminotransferase domain containing protein	NaN	NaN	NaN	26.6531	26.3223	26.371	23.2915	23.547	23.1041	26.6531	26.3223	26.371	3	15.8	32.395	0	10.414	5
LOC_Os03g13380.1	Q8H012	transmembrane 9 superfamily member	24.009	23.9527	24.2163	NaN	NaN	NaN	24.009	23.9527	24.2163	23.2527	23.2391	23.5733	3	5	67.805	0	9.43	8
LOC_Os03g13730.1	Q10PB3	translocase of chloroplast 34	29.6983	29.6511	29.7224	30.3719	30.2931	30.3243	29.6983	29.6511	29.7224	30.3719	30.2931	30.3243	7	30	36.28	0	118.79	42
LOC_Os03g13970.2	O82143	26S proteasome non-ATPase regulatory subunit 4	26.2278	26.4293	26.0501	26.0315	26.1414	25.6856	26.2278	26.4293	26.0501	26.0315	26.1414	25.6856	3	9.5	42.383	0	6.5278	10
LOC_Os03g14260.2	Q10P53	guanine nucleotide exchange family protein	28.0211	28.0214	28.1862	28.5204	28.5018	28.4527	28.0211	28.0214	28.1862	28.5204	28.5018	28.4527	17	12.4	197.64	0	44.118	53
LOC_Os03g14280.1	Q10P51	ATP-dependent Clp protease ATP-binding subunit	26.0686	25.6716	26.0047	26.2707	26.5535	26.0527	26.0686	25.6716	26.0047	26.2707	26.5535	26.0527	4	22.8	24.327	0	9.7344	8
LOC_Os03g14654.1	Q0DTF5	LTPL108 - Protease inhibitor/seed storage/LTP family precursor	27.8673	27.5013	28.0329	29.1817	29.348	29.1578	27.8673	27.5013	28.0329	29.1817	29.348	29.1578	3	14.6	15.662	0	4.1071	7
LOC_Os03g14690.1	Q10P12	vacuolar ATP synthase 98 kDa subunit	27.4215	27.1939	27.4103	27.769	27.5775	27.7877	27.4215	27.1939	27.4103	27.769	27.5775	27.7877	6	17.3	92.371	0	30.441	22
LOC_Os03g14800.4	Q10P01	serine palmitoyltransferase 1	25.3243	25.2662	25.6128	26.0908	26.4447	26.5694	25.3243	25.2662	25.6128	26.0908	26.4447	26.5694	5	18.6	52.426	0	12.727	13
LOC_Os03g14900.1	Q10NZ0	NB-ARC/LRR disease resistance protein	27.4676	27.5843	27.432	27.3068	27.3371	27.055	27.4676	27.5843	27.432	27.3068	27.3371	27.055	15	22.2	100.75	0	61.568	40
LOC_Os03g14980.2	Q10NY2	lissencephaly type-1-like homology motif	26.5667	26.5632	26.7348	27.5138	27.3914	25.2788	26.5667	26.5632	26.7348	27.5138	27.3914	25.2788	6	8.6	125.2	0	17.884	17
LOC_Os03g15050.2	Q10NX2	phosphoenolpyruvate carboxykinase	26.1445	26.3027	26.3877	26.9311	26.9312	26.954	26.1445	26.3027	26.3877	26.9311	26.9312	26.954	4	9.5	73.203	0	27.889	15
LOC_Os03g15350.1	Q10NT7	Sel1 repeat domain containing protein	NaN	24.8636	NaN	25.2618	25.3689	25.741	22.7119	24.8636	23.1001	25.2618	25.3689	25.741	3	6.1	76.572	0	7.6613	6
LOC_Os03g15700.1	Q10NP6	splicing factor 3A subunit 2	25.0316	25.0417	25.0085	NaN	NaN	NaN	25.0316	25.0417	25.0085	24.4869	24.7592	23.7979	2	9.3	35.654	0	3.6201	6
LOC_Os03g15740.1	Q10NP2	uncharacterized TPR repeat-containing protein	29.368	29.0549	29.2527	28.819	28.8635	28.9104	29.368	29.0549	29.2527	28.819	28.8635	28.9104	19	27.9	92.427	0	196.05	78
LOC_Os03g15860.1	Q84QA9	mitochondrial carrier protein	25.7113	25.6714	25.773	26.658	26.7261	26.5573	25.7113	25.6714	25.773	26.658	26.7261	26.5573	2	7.3	37.73	0	4.3184	7
LOC_Os03g15870.1	Q10NM5	ribosomal L4	29.7864	29.6679	29.5719	28.821	28.9086	28.8358	29.7864	29.6679	29.5719	28.821	28.9086	28.8358	8	22.6	34.52	0	29.564	37
LOC_Os03g15900.2	Q10NL9	SH3 domain containing protein	26.865	26.7808	26.7935	27.8782	27.9317	27.7809	26.865	26.7808	26.7935	27.8782	27.9317	27.7809	11	13	113.38	0	56.024	33
LOC_Os03g15930.2	Q10NL4	OTU-like cysteine protease family protein	NaN	NaN	NaN	24.8039	24.7992	24.8266	22.9181	24.1492	23.216	24.8039	24.7992	24.8266	3	15.2	25.2	0	10.064	10
LOC_Os03g16050.1	O64422	fructose-1	28.9012	28.8438	29.0938	28.1839	28.0344	28.1027	28.9012	28.8438	29.0938	28.1839	28.0344	28.1027	6	21.9	43.604	0	92.072	33
LOC_Os03g16440.1	Q84Q83	outer membrane protein	31.3734	31.4	31.3838	31.6133	31.6154	31.5493	31.3734	31.4	31.3838	31.6133	31.6154	31.5493	25	45.4	87.686	0	309.22	156
LOC_Os03g16690.1	Q10NC7	oxysterol-binding protein	26.66	26.3644	26.5617	27.4514	27.3719	27.5389	26.66	26.3644	26.5617	27.4514	27.3719	27.5389	6	18.8	51.806	0	21.425	14
LOC_Os03g16800.2	Q10NB4	clathrin assembly protein	26.0475	26.2155	26.3622	NaN	26.051	NaN	26.0475	26.2155	26.3622	23.8939	26.051	24.0554	4	6.3	72.039	0	13.802	12
LOC_Os03g16860.1	Q10NA9	DnaK family protein	31.0618	31.2471	31.1018	31.4259	31.4794	31.4276	31.0618	31.2471	31.1018	31.4259	31.4794	31.4276	8	46	71.1	0	247.07	129
LOC_Os03g16980.4	Q10N94	NAD dependent epimerase/dehydratase family domain containing protein	25.6676	25.484	25.739	NaN	NaN	NaN	25.6676	25.484	25.739	23.1029	24.1986	24.1082	3	24.1	28.872	0	15.36	9
LOC_Os03g17070.1	Q84PA4	ATP synthase B chain	34.7197	34.7067	34.9024	32.7563	32.767	33.1421	34.7197	34.7067	34.9024	32.7563	32.767	33.1421	14	46.4	22.729	0	187.25	128
LOC_Os03g17174.1	B9F7D0	PsbP	30.1347	30.0475	30.1731	27.4349	27.3538	27.4455	30.1347	30.0475	30.1731	27.4349	27.3538	27.4455	6	33.2	25.626	0	39.298	32
LOC_Os03g17180.1	Q10N72	ABC transporter	27.3821	27.7337	27.7023	28.4391	28.4446	28.5563	27.3821	27.7337	27.7023	28.4391	28.4446	28.5563	13	15.9	155.64	0	82.321	43
LOC_Os03g17310.1	Q8H8W1	calcium-transporting ATPase	28.8112	28.9092	28.7862	29.9251	29.8137	29.7857	28.8112	28.9092	28.7862	29.9251	29.8137	29.7857	15	20.9	115.36	0	134.42	70
LOC_Os03g17450.1	Q8H8U7	nucleotide binding protein	29.8852	29.8027	29.7813	29.8862	30.019	29.8741	29.8852	29.8027	29.7813	29.8862	30.019	29.8741	4	17.2	26.186	0	7.0682	13
LOC_Os03g17520.1	Q8H8U0	CDP-alcohol phosphatidyltransferase	27.4849	27.6713	27.4301	27.1752	27.8221	27.0015	27.4849	27.6713	27.4301	27.1752	27.8221	27.0015	4	16.7	34.364	0	19.23	17
LOC_Os03g17580.1	Q10N30	ribosomal L10	30.2505	30.4122	30.1912	29.1224	28.9785	29.1477	30.2505	30.4122	30.1912	29.1224	28.9785	29.1477	6	35.9	24.221	0	95.819	38
LOC_Os03g17600.1	Q10N28	expressed protein	27.7434	27.7861	27.8611	27.8696	27.916	27.9545	27.7434	27.7861	27.8611	27.8696	27.916	27.9545	5	21.9	26.785	0	22.632	17
LOC_Os03g17660.2	Q10N24	expressed protein;LOC_Os03g17660.1 LOC_Os03g17660.1	25.7505	25.7901	25.3929	25.2104	NaN	24.8615	25.7505	25.7901	25.3929	25.2104	22.6747	24.8615	3	12	14.079	0	20.767	3
LOC_Os03g17690.2	Q10N21	OsAPx1 - Cytosolic Ascorbate Peroxidase encoding gene 1-8	27.6253	27.9406	27.7387	28.4399	28.0858	28.1988	27.6253	27.9406	27.7387	28.4399	28.0858	28.1988	4	44.5	20.761	0	26.484	20
LOC_Os03g17700.1	Q10N20	CGMC_MAPKCGMC_2_ERK.2 - CGMC includes CDA	NaN	NaN	NaN	25.3108	25.6234	25.3067	23.8637	23.7673	22.6933	25.3108	25.6234	25.3067	2	5.4	42.995	0	3.3801	4
LOC_Os03g17710.2	Q10N19	splicing factor	25.5225	25.3426	25.513	24.6406	NaN	24.6626	25.5225	25.3426	25.513	24.6406	24.2244	24.6626	3	5.2	37.042	0	4.3792	11
LOC_Os03g18020.1	Q10MY4	rhodanese-like family protein	29.6627	29.5247	29.6726	28.0155	28.2373	28.3802	29.6627	29.5247	29.6726	28.0155	28.2373	28.3802	8	41.7	22.422	0	105.67	33
LOC_Os03g18070.1	Q10MX9	omega-3 fatty acid desaturase	28.2416	28.2542	28.1635	25.4476	25.4606	NaN	28.2416	28.2542	28.1635	25.4476	25.4606	24.1421	5	17.9	50.771	0	62.78	18
LOC_Os03g18130.4	Q10MX3	asparagine synthetase	NaN	NaN	NaN	28.075	28.1353	28.1099	22.4119	23.2229	23.7309	28.075	28.1353	28.1099	4	10.4	65.632	0	37.238	9
LOC_Os03g18160.1	Q10MX0	mitochondrial carrier protein	25.45	25.3448	25.3444	24.641	25.2084	25.375	25.45	25.3448	25.3444	24.641	25.2084	25.375	3	8.7	35.618	0	4.8213	9
LOC_Os03g18220.2	B7ERZ5	pyruvate decarboxylase isozyme 2	24.3748	24.0853	23.9565	24.5537	24.4252	24.6231	24.3748	24.0853	23.9565	24.5537	24.4252	24.6231	3	7.4	58.879	0	9.5056	15
LOC_Os03g18510.1	Q10MT2	expressed protein	27.8186	27.6209	28.1919	28.543	28.4069	28.1649	27.8186	27.6209	28.1919	28.543	28.4069	28.1649	4	16.2	38.234	0	58.184	16
LOC_Os03g18550.1	Q10MS8	mitochondrial carrier protein	26.042	26.4189	25.9767	NaN	26.6671	26.8454	26.042	26.4189	25.9767	24.1387	26.6671	26.8454	4	28.4	34.948	0	9.5796	10
LOC_Os03g18570.1	Q10MS5	40S ribosomal S7	28.3026	28.4128	27.9714	28.2457	28.3245	28.2868	28.3026	28.4128	27.9714	28.2457	28.3245	28.2868	4	44.8	22.183	0	19.416	21
LOC_Os03g18690.1	Q8W422	26S protease regulatory subunit 4	28.265	28.4545	28.3332	28.734	28.8029	28.7044	28.265	28.4545	28.3332	28.734	28.8029	28.7044	2	33.6	49.714	0	38.207	33
LOC_Os03g18720.2	Q10MR0	RNA recognition motif containing protein	24.6925	24.8523	24.9136	NaN	24.7778	NaN	24.6925	24.8523	24.9136	22.8946	24.7778	25.125	3	16	26.029	0	3.3969	5
LOC_Os03g19010.1	Q10MN2	peroxisomal biogenesis factor 11	24.148	24.0989	23.9414	27.0472	27.2952	27.3886	24.148	24.0989	23.9414	27.0472	27.2952	27.3886	5	24	25.931	0	23.114	10
LOC_Os03g19250.1	Q10MK9	AMP-binding enzyme	26.0525	25.784	25.8863	27.0251	27.0111	26.8984	26.0525	25.784	25.8863	27.0251	27.0111	26.8984	5	13.1	62.695	0	16.29	13
LOC_Os03g19290.1	Q10MK4	mitochondrial import inner membrane translocase subunit Tim17	NaN	24.2671	23.9565	27.7207	27.8456	27.5557	23.3578	24.2671	23.9565	27.7207	27.8456	27.5557	4	34.6	18.37	0	26.649	11
LOC_Os03g19410.1	Q10MJ1	OsPOP7 - Putative Prolyl Oligopeptidase homologue	25.1597	25.7409	25.827	25.5334	24.9857	24.9358	25.1597	25.7409	25.827	25.5334	24.9857	24.9358	4	6.4	103.89	0	9.0397	7
LOC_Os03g19452.1	Q10MI7	SMP-30/Gluconolaconase/LRE domain protein	25.6889	26.0018	25.8412	26.577	26.5357	26.2192	25.6889	26.0018	25.8412	26.577	26.5357	26.2192	5	19.6	35.558	0	13.938	14
LOC_Os03g19510.1	Q50LH5	OsClp4 - Putative Clp protease homologue	25.9274	25.9935	25.9921	NaN	NaN	NaN	25.9274	25.9935	25.9921	24.1951	23.6767	24.4305	2	14.9	30.396	0	11.336	7
LOC_Os03g19560.2	Q10MH5	tetratricopeptide repeat domain containing protein	25.5833	25.5923	24.8969	24.0966	23.869	23.848	25.5833	25.5923	24.8969	24.0966	23.869	23.848	2	5.7	60.038	0	12.791	8
LOC_Os03g19590.1	I3RUD9	phytochrome B	26.6633	26.889	26.929	27.4877	27.7027	27.4267	26.6633	26.889	26.929	27.4877	27.7027	27.4267	6	7.3	128.49	0	14.356	16
LOC_Os03g19690.1	B9F831	expressed protein;LOC_Os03g19690.2 LOC_Os03g19690.2	25.9461	25.2407	25.3413	26.2067	26.3087	25.7745	25.9461	25.2407	25.3413	26.2067	26.3087	25.7745	5	8.3	92.46	0	46.373	17
LOC_Os03g19760.1	Q10ME8	HAD-superfamily hydrolase	29.3619	29.2497	29.2949	28.2228	28.0531	28.1704	29.3619	29.2497	29.2949	28.2228	28.0531	28.1704	5	15.8	116.37	0	167.69	50
LOC_Os03g19890.1	Q10MD5	NADH dehydrogenase 1 alpha subcomplex subunit 5	28.803	28.826	29.1721	29.8916	29.9997	29.9225	28.803	28.826	29.1721	29.8916	29.9997	29.9225	8	49.1	19.513	0	63.659	39
LOC_Os03g19960.2	Q10MC6	ATP-dependent RNA helicase	23.77	NaN	NaN	25.3204	24.7755	25.3134	23.77	23.3697	24.5445	25.3204	24.7755	25.3134	4	8.7	62.705	0	7.2203	7
LOC_Os03g20100.1	Q10MB2	S1 RNA binding domain containing protein	30.8247	30.6657	30.705	30.4337	30.3423	30.3297	30.8247	30.6657	30.705	30.4337	30.3423	30.3297	10	37.1	43.309	0	67.204	54
LOC_Os03g20300.3	Q10M94	glucose-6-phosphate 1-dehydrogenase	NaN	24.9145	NaN	25.4814	25.8286	25.221	23.9587	24.9145	23.508	25.4814	25.8286	25.221	4	13.1	62.839	0	18.146	8
LOC_Os03g20310.4	Q6IVC3	transcription factor HBP-1b	24.4986	24.3932	24.4979	24.2316	NaN	24.4925	24.4986	24.3932	24.4979	24.2316	23.0497	24.4925	3	8.7	37.07	0	4.3196	4
LOC_Os03g20640.1	Q10M56	expressed protein	25.8312	25.8404	25.9168	NaN	NaN	NaN	25.8312	25.8404	25.9168	24.7878	23.3876	23.7826	2	8.3	34.631	0	11.331	4
LOC_Os03g20700.2	Q10M50	magnesium-chelatase	30.7909	30.7749	30.7641	28.9248	28.81	28.8722	30.7909	30.7749	30.7641	28.9248	28.81	28.8722	35	32.5	153.47	0	274.45	111
LOC_Os03g20750.1	Q10M45	outer mitochondrial membrane porin	28.9714	28.9628	28.8231	27.8336	27.8264	27.9117	28.9714	28.9628	28.8231	27.8336	27.8264	27.9117	8	36.5	37.337	0	63.481	34
LOC_Os03g20860.1	Q10M34	expressed protein	27.0999	27.0813	26.936	27.9222	28.0719	28.0814	27.0999	27.0813	26.936	27.9222	28.0719	28.0814	5	22	23.889	0	66.573	21
LOC_Os03g21040.2	Q10M12	stress responsive protein	31.3494	31.2408	31.2938	32.5946	32.6009	32.6153	31.3494	31.2408	31.2938	32.5946	32.6009	32.6153	12	53.2	38.822	0	169.01	105
LOC_Os03g21370.1	Q10LX6	expressed protein;LOC_Os03g21370.2 LOC_Os03g21370.2	31.7125	31.8227	31.7982	28.2339	28.1523	28.3722	31.7125	31.8227	31.7982	28.2339	28.1523	28.3722	9	48.1	23.596	0	107.06	61
LOC_Os03g21380.2	Q10LX4	OsCML27 - Calmodulin-related calcium sensor protein	NaN	NaN	NaN	25.7039	25.8142	25.6303	23.7449	22.6889	22.4982	25.7039	25.8142	25.6303	2	17.4	20.344	0	9.6511	4
LOC_Os03g21490.2	Q10LW5	ABC transporter	27.3973	27.3492	27.5682	27.5985	27.5764	27.3514	27.3973	27.3492	27.5682	27.5985	27.5764	27.3514	7	28.3	33.355	0	43.691	33
LOC_Os03g21540.1	Q10LW0	TKL_IRAK_CrRLK1L-1.8 - The CrRLK1L-1 subfamily has homology to the CrRLK1L homolog	25.1235	25.3471	25.2157	25.1651	NaN	24.8167	25.1235	25.3471	25.2157	25.1651	23.6026	24.8167	3	6.7	96.269	0	3.3519	5
LOC_Os03g21560.1	Q10LV7	photosystem II 11 kD protein	33.1448	33.27	33.2316	31.8537	32.0017	31.9474	33.1448	33.27	33.2316	31.8537	32.0017	31.9474	7	43	17.653	0	136.64	66
LOC_Os03g21720.1	Q10LT8	vacuolar-sorting receptor precursor	27.4466	27.388	27.6316	28.3725	28.2318	28.3157	27.4466	27.388	27.6316	28.3725	28.2318	28.3157	6	13.4	69.982	0	22.586	27
LOC_Os03g21780.1	Q10LT2	pentatricopeptide repeat domain containing protein	26.0673	25.9176	26.062	NaN	NaN	NaN	26.0673	25.9176	26.062	23.1108	24.016	23.5364	5	13.8	58.546	0	14.704	6
LOC_Os03g21900.1	Q10LR9	uroporphyrinogen decarboxylase	26.5146	26.6005	26.7389	26.0754	26.2898	26.2885	26.5146	26.6005	26.7389	26.0754	26.2898	26.2885	7	24.1	42.844	0	39.517	17
LOC_Os03g21950.1	Q10LR5	fumarate hydratase	25.4823	24.9494	25.1505	28.5324	28.5692	28.8441	25.4823	24.9494	25.1505	28.5324	28.5692	28.8441	9	22.9	53.682	0	43.632	20
LOC_Os03g22120.2	Q10LP3	sucrose synthase	24.486	NaN	24.3138	25.6974	25.801	26.5459	24.486	24.0842	24.3138	25.6974	25.801	26.5459	3	7.7	76.853	0	7.1752	8
LOC_Os03g22180.1	Q10LN7	60S ribosomal L18-3	27.6498	27.8431	27.7275	27.5486	27.6374	27.497	27.6498	27.8431	27.7275	27.5486	27.6374	27.497	2	24.1	21.074	0	24.16	17
LOC_Os03g22340.1	Q762A6	60S ribosomal L22-2	25.9916	26.1486	25.7251	NaN	NaN	26.6453	25.9916	26.1486	25.7251	23.0155	24.0521	26.6453	2	24.4	14.471	0	6.8768	11
LOC_Os03g22380.3	Q10LL4	RNA recognition motif containing protein	26.5982	26.6363	26.8342	27.4502	27.4568	27.2744	26.5982	26.6363	26.8342	27.4502	27.4568	27.2744	3	13.6	26.833	0	14.742	12
LOC_Os03g22460.2	Q10LK2	expressed protein;LOC_Os03g46490.1 LOC_Os03g46490.1	NaN	NaN	NaN	26.1984	26.2089	26.4434	23.8321	23.2118	23.1564	26.1984	26.2089	26.4434	1	21.4	7.7809	0	35.162	11
LOC_Os03g22570.2	Q10LJ0	MIF4G domain containing protein	25.1223	25.1568	25.2687	25.3663	25.4723	25.4756	25.1223	25.1568	25.2687	25.3663	25.4723	25.4756	3	4.7	98.889	0	21.134	10
LOC_Os03g22690.1	Q10LH9	nucleoporin interacting component	26.4648	26.6103	26.4658	27.1085	26.9299	27.0117	26.4648	26.6103	26.4658	27.1085	26.9299	27.0117	8	13.4	96.55	0	69.941	22
LOC_Os03g22740.1	Q10LH4	nucleolar NOP5-1	27.9903	27.8976	28.0013	26.992	26.8931	26.6206	27.9903	27.8976	28.0013	26.992	26.8931	26.6206	10	25	62.631	0	37.068	32
LOC_Os03g22780.1	Q10LH0	DVR	29.5531	29.5699	29.4813	28.3263	28.3351	28.3842	29.5531	29.5699	29.4813	28.3263	28.3351	28.3842	7	23.5	43.267	0	121	26
LOC_Os03g22950.1	Q10LF1	acyl carrier protein	26.9427	26.6952	27.032	28.7461	28.5868	28.7332	26.9427	26.6952	27.032	28.7461	28.5868	28.7332	2	18.5	14.77	0	6.0655	13
LOC_Os03g23950.1	Q10LA0	adapitin protein	28.2688	28.1287	28.1736	28.3525	28.3681	28.2541	28.2688	28.1287	28.1736	28.3525	28.3681	28.2541	12	16.4	99.107	0	34.526	37
LOC_Os03g54040.1	Q850L8	ribosomal L6	30.33	30.3253	30.4535	29.4117	29.3247	29.3838	30.33	30.3253	30.4535	29.4117	29.3247	29.3838	10	43.4	24.977	0	102.82	55
LOC_Os03g24060.1	Q10L89	tetratricopeptide repeat containing protein	26.2477	26.2503	26.1297	25.7359	25.5909	25.8183	26.2477	26.2503	26.1297	25.7359	25.5909	25.8183	2	12.1	19.095	0	14.332	8
LOC_Os03g24220.2	Q10L71	villin protein	27.7928	27.988	27.9922	28.272	28.383	28.3784	27.7928	27.988	27.9922	28.272	28.383	28.3784	12	19	106.12	0	131.44	36
LOC_Os03g24380.1	Q10L56	glutathione peroxidase domain containing protein	27.3663	27.216	27.2899	28.2121	28.385	28.5171	27.3663	27.216	27.2899	28.2121	28.385	28.5171	5	21.9	19.234	0	15.838	12
LOC_Os03g24580.1	Q10L35	transmembrane 85	26.7309	26.5195	26.4785	26.4408	26.2795	26.5933	26.7309	26.5195	26.4785	26.4408	26.2795	26.5933	4	32	19.299	0	7.9799	11
LOC_Os03g24590.1	Q10L33	mTERF domain containing protein	25.7254	25.5336	25.8254	NaN	NaN	NaN	25.7254	25.5336	25.8254	23.8566	25.0343	23.6429	4	16.3	32.895	0	8.502	11
LOC_Os03g24860.1	Q10L06	transporter family protein	28.3799	28.4444	28.1202	27.0096	27.0132	26.9343	28.3799	28.4444	28.1202	27.0096	27.0132	26.9343	2	3	56.28	0	34.281	7
LOC_Os03g25970.2	Q10KN9	KH domain-containing protein	25.1302	24.6951	25.1058	26.0979	25.8063	26.2502	25.1302	24.6951	25.1058	26.0979	25.8063	26.2502	5	17.2	57.843	0	25.848	13
LOC_Os03g26820.1	Q6ASY2	LTPL52 - Protease inhibitor/seed storage/LTP family precursor	25.9628	25.9678	25.8861	26.2012	26.5939	26.4169	25.9628	25.9678	25.8861	26.2012	26.5939	26.4169	2	16.3	16.899	0	6.4641	9
LOC_Os03g26960.1	Q10KF1	intron-binding aquarius	26.2498	26	26.3224	26.7483	27.0147	26.6562	26.2498	26	26.3224	26.7483	27.0147	26.6562	6	5.1	181.05	0	18.233	13
LOC_Os03g27280.1	Q10KB6	CAMK_CAMK_like.19 - CAMK includes calcium/calmodulin depedent kinases	NaN	NaN	NaN	27.207	27.2993	27.2991	22.6784	23.2166	23.7376	27.207	27.2993	27.2991	3	15.8	38.698	0	14.322	6
LOC_Os03g27290.1	Q9SXV0	cytochrome c oxidase subunit	28.5125	28.5578	28.6237	30.0646	30.0219	30.0576	28.5125	28.5578	28.6237	30.0646	30.0219	30.0576	4	27.2	18.912	0	111.69	34
LOC_Os03g27320.5	Q7XXQ9	steroid binding protein	24.6967	24.8532	24.9802	24.5152	24.843	24.8987	24.6967	24.8532	24.9802	24.5152	24.843	24.8987	2	16.5	24.509	0	4.3499	5
LOC_Os03g27370.1	Q75KP6	phospholipase D	NaN	NaN	NaN	25.4965	25.6296	25.3413	22.851	24.7113	23.4995	25.4965	25.6296	25.3413	3	7.3	93.55	0	15.018	2
LOC_Os03g28330.4	P31924	sucrose synthase	31.0152	30.8911	30.8666	30.4025	30.6034	30.5256	31.0152	30.8911	30.8666	30.4025	30.6034	30.5256	19	42.4	92.907	0	209.13	128
LOC_Os03g29170.2	Q7Y0G5	sterol-4-alpha-carboxylate 3-dehydrogenase	25.2712	25.2902	25.4173	25.6771	25.9224	25.4383	25.2712	25.2902	25.4173	25.6771	25.9224	25.4383	3	9.1	52.225	0	21.649	8
LOC_Os03g29180.1	Q7Y0E6	ubiquinone biosynthesis COQ9	26.5155	26.598	26.5795	27.8529	27.8971	27.8604	26.5155	26.598	26.5795	27.8529	27.8971	27.8604	6	22.9	34.403	0	9.461	14
LOC_Os03g29190.2	Q7Y0E8	PDI	25.9603	25.7092	26.2267	27.5328	27.4087	27.3222	25.9603	25.7092	26.2267	27.5328	27.4087	27.3222	4	12.7	63.288	0	30.809	20
LOC_Os03g29350.2	Q10JU7	von Willebrand factor type A domain containing protein	27.3429	27.4124	27.2512	27.978	28.1914	28.1529	27.3429	27.4124	27.2512	27.978	28.1914	28.1529	7	15.6	75.792	0	32.777	27
LOC_Os03g29730.1	A0A0P0VYP9	expressed protein	24.497	24.3704	24.1996	24.9104	24.6205	25.2928	24.497	24.3704	24.1996	24.9104	24.6205	25.2928	3	12.7	33.382	0	7.3196	7
LOC_Os03g29950.2	Q75IZ9	glucose-6-phosphate 1-dehydrogenase	26.1987	26.3366	26.3726	27.3016	27.3664	27.6108	26.1987	26.3366	26.3726	27.3016	27.3664	27.6108	5	19.3	51.331	0	19.162	12
LOC_Os03g30790.1	Q6ATM4	erlin-2 precursor	26.0808	25.887	26.1191	27.4891	27.5168	27.3802	26.0808	25.887	26.1191	27.4891	27.5168	27.3802	8	27	42.669	0	36.788	22
LOC_Os03g31090.1	P40978	40S ribosomal S19	28.7247	28.5269	28.7155	29.8573	29.6595	29.4917	28.7247	28.5269	28.7155	29.8573	29.6595	29.4917	5	34.9	16.387	0	8.7552	31
LOC_Os03g31150.3	Q84MH1	expressed protein;LOC_Os03g31150.2 LOC_Os03g31150.2	24.2918	24.8688	24.8026	NaN	NaN	NaN	24.2918	24.8688	24.8026	24.1597	24.0685	23.9435	4	8.8	70.79	0	7.5483	6
LOC_Os03g31300.1	Q75GT3	chaperone clpB 1	29.1407	29.0583	29.0078	28.9709	29.0169	29.0614	29.1407	29.0583	29.0078	28.9709	29.0169	29.0614	17	23.5	108.98	0	188.32	72
LOC_Os03g31400.1	Q75I67	U-box domain-containing protein	24.9928	25.1598	24.8756	25.62	NaN	25.5442	24.9928	25.1598	24.8756	25.62	23.1885	25.5442	4	4.7	116.37	0	10.28	8
LOC_Os03g32170.1	Q60DC5	NAD dependent epimerase/dehydratase family protein	24.5762	NaN	24.6355	26.6672	26.5868	26.7914	24.5762	23.8924	24.6355	26.6672	26.5868	26.7914	2	6.6	44.045	0	5.9202	7
LOC_Os03g32314.1	Q75KD7	allene oxide cyclase 4	25.6663	25.351	25.3803	26.2362	26.5151	26.5979	25.6663	25.351	25.3803	26.2362	26.5151	26.5979	3	12.9	26.05	0	4.6832	8
LOC_Os03g32630.1	Q8S694	ABC transporter	26.3128	26.1388	26.3683	25.5517	25.7739	25.4223	26.3128	26.1388	26.3683	25.5517	25.7739	25.4223	4	10.8	77.815	0	26.285	9
LOC_Os03g34040.1	Q850W6	ribosomal protein	28.9045	28.7818	28.8224	29.5905	29.6163	29.6841	28.9045	28.7818	28.8224	29.5905	29.6163	29.6841	6	18.7	34.885	0	49.896	24
LOC_Os03g36540.1	Q53RM0	magnesium-chelatase subunit chlI	31.4087	31.3933	31.4009	30.6482	30.6777	30.6851	31.4087	31.3933	31.4009	30.6482	30.6777	30.6851	15	45.1	44.865	0	244.36	101
LOC_Os03g36730.1	Q94I55	OST3/OST6 family protein	27.2877	27.0752	27.2661	27.7982	27.8127	28.0092	27.2877	27.0752	27.2661	27.7982	27.8127	28.0092	3	10.7	37.59	0	26.627	20
LOC_Os03g36750.1	Q10I42	cbbY	27.5603	27.5587	27.5937	NaN	NaN	NaN	27.5603	27.5587	27.5937	23.6919	24.7836	23.3331	2	6.6	33.702	0	26.615	7
LOC_Os03g37640.1	Q75L61	MATE efflux family protein	26.6055	26.5717	NaN	27.8953	27.8868	27.1963	26.6055	26.5717	23.3762	27.8953	27.8868	27.1963	2	4.4	53.623	0	36.631	11
LOC_Os03g37970.1	Q7XJB4	ribosomal L13	25.6351	25.6973	25.4382	25.795	25.717	NaN	25.6351	25.6973	25.4382	25.795	25.717	25.1112	1	24.5	24.014	0	18.136	7
LOC_Os03g38000.2	Q75G91	40S ribosomal S3-1	28.6176	28.4352	28.5054	29.4116	29.2063	29.2464	28.6176	28.4352	28.5054	29.4116	29.2063	29.2464	7	40	22.818	0	89.847	29
LOC_Os03g38230.1	Q84NY6	peptidase M50 family protein	28.3661	28.1722	28.299	27.7397	26.8805	26.9268	28.3661	28.1722	28.299	27.7397	26.8805	26.9268	6	23.6	43.604	0	58.504	18
LOC_Os03g38260.1	Q84NX8	60S ribosomal L19-3	26.9477	27.0808	26.7737	NaN	NaN	NaN	26.9477	27.0808	26.7737	23.877	23.3508	24.2205	2	16	24.121	0	48.262	11
LOC_Os03g38970.1	Q6F2V0	metal ion binding protein	26.2355	26.3503	26.2422	28.0597	28.1738	27.968	26.2355	26.3503	26.2422	28.0597	28.1738	27.968	12	11.7	142.36	0	67.628	31
LOC_Os03g39610.1	I3QD65	chlorophyll A-B binding protein	36.5077	36.7175	36.4992	35.0359	34.8008	34.9561	36.5077	36.7175	36.4992	35.0359	34.8008	34.9561	9	57.4	28.495	0	225.53	242
LOC_Os03g39830.1	Q851H6	expressed protein	29.6675	29.6401	29.8577	27.014	26.9063	27.0988	29.6675	29.6401	29.8577	27.014	26.9063	27.0988	3	16.1	12.783	0	88.86	17
LOC_Os03g40270.1	Q8H8T0	alpha-1	27.6726	27.8356	27.6029	27.2788	27.5847	27.4985	27.6726	27.8356	27.6029	27.2788	27.5847	27.4985	7	25.3	41.348	0	19.7	21
LOC_Os03g40920.1	Q75I36	expressed protein	28.3544	28.4873	27.7491	27.288	27.1948	27.1972	28.3544	28.4873	27.7491	27.288	27.1948	27.1972	2	13.8	17.198	0	6.0797	13
LOC_Os03g41419.1	B9F9P1	serpin domain containing protein	26.7633	26.3491	26.291	27.2819	27.5127	27.8874	26.7633	26.3491	26.291	27.2819	27.5127	27.8874	1	9	78.658	0	10.709	13
LOC_Os03g42110.1	Q6AV34	semialdehyde dehydrogenase	29.1868	29.1822	29.3159	29.0071	29.2608	29.3795	29.1868	29.1822	29.3159	29.0071	29.2608	29.3795	12	41	44.786	0	100.08	54
LOC_Os03g42220.2	Q6AV23	T-complex protein	28.0433	27.9109	27.6544	28.1393	27.92	28.0368	28.0433	27.9109	27.6544	28.1393	27.92	28.0368	1	23.8	54.453	0	37.213	41
LOC_Os03g42320.1	Q851W1	Sec1 family transport protein	NaN	NaN	NaN	25.8671	25.7583	25.8122	23.0314	23.0324	23.6906	25.8671	25.7583	25.8122	4	9.1	67.816	0	8.3816	11
LOC_Os03g42750.2	Q10GJ4	roothairless 1	25.9249	26.4995	26.3714	26.4557	25.6902	26.1157	25.9249	26.4995	26.3714	26.4557	25.6902	26.1157	5	8.2	96.11	0	15.674	14
LOC_Os03g42799.1	B9F9T3	expressed protein	25.8221	25.9742	25.8668	25.2776	NaN	NaN	25.8221	25.9742	25.8668	25.2776	24.2967	24.1213	2	33.9	6.3795	0	5.687	15
LOC_Os03g42900.2	Q10GH7	KH domain containing protein	26.3329	26.2389	26.3493	NaN	NaN	26.0235	26.3329	26.2389	26.3493	24.1132	23.777	26.0235	1	6.2	42.666	0	4.3288	6
LOC_Os03g43430.1	Q75GK3	mttA/Hcf106 family protein	NaN	NaN	NaN	25.7536	26.0499	25.9548	23.108	24.2954	23.1145	25.7536	26.0499	25.9548	2	22.9	16.659	0	15.859	7
LOC_Os03g43760.1	Q75J49	kinase domain containing protein	26.8165	27.1063	26.8351	27.7286	27.5879	27.6984	26.8165	27.1063	26.8351	27.7286	27.5879	27.6984	5	22.2	41.757	0	35.728	29
LOC_Os03g44300.1	Q10G39	transketolase	25.9094	26.1573	24.8078	23.2408	23.114	NaN	25.9094	26.1573	24.8078	23.2408	23.114	23.182	1	9.5	42.876	0	7.5835	8
LOC_Os03g44420.1	Q10G26	tubulin/FtsZ domain containing protein	29.4992	28.159	29.2352	28.9874	29.2294	29.1766	29.4992	28.159	29.2352	28.9874	29.2294	29.1766	4	15.9	47.241	0	25.622	25
LOC_Os03g45194.1	Q84ST4	oxidoreductase	27.0884	26.9087	27.0163	26.6251	26.7956	26.8561	27.0884	26.9087	27.0163	26.6251	26.7956	26.8561	3	7.6	60.876	0	10.08	13
LOC_Os03g45260.1	Q6AT61	vesicle transport v-SNARE protein	25.0149	24.8925	24.9542	24.8121	24.8469	25.041	25.0149	24.8925	24.9542	24.8121	24.8469	25.041	2	20.5	27.137	0	15.914	7
LOC_Os03g45340.1	Q10FT7	hsp20/alpha crystallin family protein	26.047	26.0362	26.0691	25.9951	26.097	25.9013	26.047	26.0362	26.0691	25.9951	26.097	25.9013	4	28.8	31.886	0	38.206	13
LOC_Os03g45420.1	Q10FT0	armadillo/beta-catenin repeat family protein	NaN	NaN	NaN	25.6986	24.9643	25.5036	23.6569	24.2442	23.3899	25.6986	24.9643	25.5036	4	5.8	88.482	0	7.3878	6
LOC_Os03g46340.1	Q75H96	pleckstrin homology domain-containing protein	25.0386	25.0887	25.0442	NaN	NaN	NaN	25.0386	25.0887	25.0442	23.785	23.8048	25.1849	3	7.8	54.56	0	9.1305	9
LOC_Os03g46390.1	Q75HA2	ras-related protein	25.7492	25.9673	25.9411	NaN	25.8874	NaN	25.7492	25.9673	25.9411	23.2272	25.8874	22.6245	2	28.6	22.137	0	7.2534	7
LOC_Os03g46740.2	Q10FF0	ABC transporter	25.4407	25.842	24.6869	25.4295	25.4248	25.4691	25.4407	25.842	24.6869	25.4295	25.4248	25.4691	2	8.2	36.587	0	5.6803	7
LOC_Os03g46920.1	Q84R70	expressed protein	24.3105	NaN	24.1916	24.5652	24.6551	24.6084	24.3105	23.1778	24.1916	24.5652	24.6551	24.6084	2	5.1	81.602	0.0017118	2.4295	3
LOC_Os03g47930.1	Q10F28	expressed protein	26.1559	26.3116	26.0907	26.6716	26.598	26.6604	26.1559	26.3116	26.0907	26.6716	26.598	26.6604	10	12.5	125.3	0	32.599	19
LOC_Os03g48000.3	Q9AUK4	CorA-like magnesium transporter protein	27.674	27.6347	27.6898	26.4281	26.4557	26.5084	27.674	27.6347	27.6898	26.4281	26.4557	26.5084	8	21.4	43.114	0	48.425	24
LOC_Os03g48110.1	Q6AVU9	expressed protein	27.603	27.6391	27.6664	28.5645	28.5579	28.6815	27.603	27.6391	27.6664	28.5645	28.5579	28.6815	3	41.5	11.149	0	16.632	16
LOC_Os03g48140.1	A0A0P0W1J8	myosin	26.372	26.4706	26.62	27.5408	27.5681	27.3173	26.372	26.4706	26.62	27.5408	27.5681	27.3173	7	6.8	178.21	0	29.169	19
LOC_Os03g48180.1	Q6AVV6	peptide transporter PTR2	NaN	NaN	26.5247	26.4294	26.3429	26.5556	23.0837	23.1681	26.5247	26.4294	26.3429	26.5556	5	12.6	63.562	0	11.703	13
LOC_Os03g48260.1	Q6AVI7	expressed protein	27.0501	27.4617	27.1544	24.6757	25.6166	25.4677	27.0501	27.4617	27.1544	24.6757	25.6166	25.4677	4	9.9	48.764	0	53.471	12
LOC_Os03g48710.1	Q851J4	expressed protein;LOC_Os03g48710.2 LOC_Os03g48710.2	24.738	24.7971	24.8795	26.1157	27.3028	27.5249	24.738	24.7971	24.8795	26.1157	27.3028	27.5249	2	12.2	18.66	0	3.6416	6
LOC_Os03g48920.1	Q851E0	DUF1517 domain containing protein	29.217	29.0966	29.0767	27.5245	27.0495	27.2622	29.217	29.0966	29.0767	27.5245	27.0495	27.2622	6	21.1	41.887	0	22.39	17
LOC_Os03g49380.1	Q53RB0	lipoxygenase	28.7054	28.7309	28.717	30.5081	30.5517	30.4292	28.7054	28.7309	28.717	30.5081	30.5517	30.4292	21	32.2	98.697	0	100.47	77
LOC_Os03g49600.5	A0A067Y2M1	Os3bglu7 - beta-glucosidase	26.5235	26.9532	26.9581	24.713	25.1455	25.0042	26.5235	26.9532	26.9581	24.713	25.1455	25.0042	3	11.4	33.002	0	7.4161	9
LOC_Os03g49710.1	Q75IA5	ribosomal S13p/S18e	27.6925	27.8822	28.0138	27.9185	27.92	28.0458	27.6925	27.8822	28.0138	27.9185	27.92	28.0458	6	26.3	19.222	0	22.423	21
LOC_Os03g49720.1	Q75IA6	PAP fibrillin family domain containing protein	31.2908	31.364	31.3163	29.1844	29.1819	29.2587	31.2908	31.364	31.3163	29.1844	29.1819	29.2587	13	54.6	29.241	0	139.68	62
LOC_Os03g50010.1	Q10E52	toc64	26.6787	26.4892	27.0343	27.0112	26.6113	26.7297	26.6787	26.4892	27.0343	27.0112	26.6113	26.7297	5	11.1	63.307	0	22.021	18
LOC_Os03g50080.1	Q53RK7	peptidyl-prolyl cis-trans isomerase	28.3457	28.5793	28.4208	26.7464	27.4619	27.6641	28.3457	28.5793	28.4208	26.7464	27.4619	27.6641	4	27.8	26.624	0	43.318	13
LOC_Os03g50090.4	Q53RK8	transposon protein	25.1123	25.0171	25.0235	24.7956	24.963	25.0488	25.1123	25.0171	25.0235	24.7956	24.963	25.0488	3	4.8	84.52	0	4.4997	3
LOC_Os03g50290.3	Q06967	14-3-3 protein	30.0366	30.0837	29.9786	31.1288	31.0265	31.0678	30.0366	30.0837	29.9786	31.1288	31.0265	31.0678	7	53.5	29.177	0	244.07	57
LOC_Os03g50300.1	Q10E21	CASP	24.3005	NaN	NaN	25.9005	25.4901	25.2347	24.3005	24.3591	22.9759	25.9005	25.4901	25.2347	2	3.7	77.469	0	3.5145	5
LOC_Os03g50320.1	B9FB57	phosphatidylinositol 4-kinase PI4K	24.5803	24.5891	24.4932	24.8092	24.8705	24.9509	24.5803	24.5891	24.4932	24.8092	24.8705	24.9509	2	3.3	88.167	0	3.4004	4
LOC_Os03g50325.1	Q53RI7	phosphatidylinositol 4-kinase	NaN	NaN	NaN	25.1357	25.268	25.2717	23.0944	23.6439	22.91	25.1357	25.268	25.2717	2	4.6	89.723	0	4.7795	3
LOC_Os03g50340.1	Q9AUR8	coatomer alpha subunit	30.169	30.1657	30.1688	30.9171	31.0003	31.0416	30.169	30.1657	30.1688	30.9171	31.0003	31.0416	1	28.2	136.38	0	227.81	106
LOC_Os03g50450.1	Q9AUQ7	inactive receptor kinase At2g26730 precursor	25.7399	25.696	25.4593	NaN	NaN	NaN	25.7399	25.696	25.4593	23.7012	23.0048	22.9864	4	9.2	71.887	0	24.552	9
LOC_Os03g50480.2	Q9AUQ4	phosphoglucomutase	27.2289	27.2175	27.2165	27.8501	27.8096	27.8236	27.2289	27.2175	27.2165	27.8501	27.8096	27.8236	9	28.1	54.533	0	31.252	31
LOC_Os03g50520.1	Q8W315	dynamin family protein	27.7816	27.6609	27.8062	27.5932	27.5588	27.6066	27.7816	27.6609	27.8062	27.5932	27.5588	27.6066	9	29.1	68.03	0	58.997	37
LOC_Os03g50540.1	Q8W317	2Fe-2S iron-sulfur cluster binding domain containing protein	31.2896	31.3146	31.4651	31.7817	31.7738	31.7669	31.2896	31.3146	31.4651	31.7817	31.7738	31.7669	22	49	81.116	0	323.31	136
LOC_Os03g50740.3	Q10DX1	retrotransposon protein	NaN	25.1322	NaN	25.8188	26.0309	25.9419	22.8076	25.1322	24.394	25.8188	26.0309	25.9419	3	3.9	103.29	0	8.0665	3
LOC_Os03g50850.1	Q10DW3	ZOS3-17 - C2H2 zinc finger protein	NaN	25.6925	NaN	25.9266	25.5568	25.5973	24.3592	25.6925	24.0462	25.9266	25.5568	25.5973	4	12.6	59.84	0	20.276	4
LOC_Os03g50885.1	V5K461	actin	27.6583	27.6202	27.9673	30.5933	30.686	30.6474	27.6583	27.6202	27.9673	30.5933	30.686	30.6474	1	44.8	41.812	0	15.209	21
LOC_Os03g51050.1	Q93VE2	peptide transporter PTR2	NaN	NaN	26.362	28.4487	28.6548	28.6361	23.2024	22.8407	26.362	28.4487	28.6548	28.6361	5	13.7	65.613	0	34.928	13
LOC_Os03g51080.1	Q6ASV4	glutamate decarboxylase	25.4004	25.441	25.6439	26.3853	26.355	26.3883	25.4004	25.441	25.6439	26.3853	26.355	26.3883	2	8.7	55.065	0	13.791	10
LOC_Os03g51140.1	Q0DP22	HEAT repeat family protein	28.3689	28.1566	28.104	28.5006	28.2976	28.3007	28.3689	28.1566	28.104	28.5006	28.2976	28.3007	14	18.1	129.97	0	52.02	41
LOC_Os03g51150.1	Q8LLP6	expressed protein	28.9875	29.1123	29.062	28.694	28.6463	28.7187	28.9875	29.1123	29.062	28.694	28.6463	28.7187	10	25.2	62.409	0	91.662	41
LOC_Os03g51160.2	Q6ASU6	fb27	26.47	26.4712	NaN	27.2908	27.5211	27.1131	26.47	26.4712	23.1286	27.2908	27.5211	27.1131	4	20.6	21.727	0	10.778	14
LOC_Os03g51250.1	Q10DR8	adenylyl cyclase-associated protein	25.8631	25.7009	25.7192	26.1233	25.7022	25.8715	25.8631	25.7009	25.7192	26.1233	25.7022	25.8715	5	15.9	52.054	0	17.288	14
LOC_Os03g51920.1	Q851F9	peptidase	27.2406	27.2997	27.2976	26.1894	26.2647	26.2931	27.2406	27.2997	27.2976	26.1894	26.2647	26.2931	4	7.8	62.794	0	23.691	15
LOC_Os03g51930.2	Q851F8	expressed protein;LOC_Os03g51930.1 LOC_Os03g51930.1	28.4136	28.3581	28.0756	NaN	NaN	NaN	28.4136	28.3581	28.0756	23.9183	23.9651	24.814	2	10	28.326	0	6.471	7
LOC_Os03g51950.1	Q851F6	expressed protein;LOC_Os03g51950.2 LOC_Os03g51950.2	28.6203	28.7478	28.6819	28.9133	28.9816	29.0486	28.6203	28.7478	28.6819	28.9133	28.9816	29.0486	6	30.6	27.208	0	70.218	27
LOC_Os03g51960.2	Q851F5	expressed protein;LOC_Os03g51960.1 LOC_Os03g51960.1	28.4604	28.5501	28.548	28.7433	28.7137	28.7621	28.4604	28.5501	28.548	28.7433	28.7137	28.7621	7	30.6	24.201	0	64.682	32
LOC_Os03g52010.1	Q10DG8	lecithin cholesterol acyltransferase	27.8332	27.8967	27.8532	27.9675	27.5748	27.3486	27.8332	27.8967	27.8532	27.9675	27.5748	27.3486	10	33.1	50.029	0	57.912	30
LOC_Os03g52239.1	Q10DD6	homeobox domain containing protein	NaN	NaN	NaN	25.46	25.4765	25.5044	23.223	23.6692	24.0893	25.46	25.4765	25.5044	3	6.6	81.918	0	7.9699	6
LOC_Os03g52310.1	Q6AVI0	transposon protein	29.7082	29.5438	29.6406	30.2112	30.3016	30.2332	29.7082	29.5438	29.6406	30.2112	30.3016	30.2332	6	31.4	80.975	0	170.96	77
LOC_Os03g52460.1	Q6AVT2	glucose-1-phosphate adenylyltransferase large subunit	25.3224	25.3442	25.6407	NaN	NaN	NaN	25.3224	25.3442	25.6407	24.9695	23.2015	23.3069	3	7.6	55.426	0	15.231	8
LOC_Os03g52490.1	Q6AVS5	nucleic acid binding protein	26.9662	27.0023	26.8229	26.928	26.7802	26.8179	26.9662	27.0023	26.8229	26.928	26.7802	26.8179	3	17.9	32.517	0	24.655	9
LOC_Os03g52630.1	Q84R49	endoglucanase	25.7878	25.9136	25.9903	NaN	NaN	NaN	25.7878	25.9136	25.9903	25.0212	23.7211	23.8492	3	5.5	69.066	0	8.0443	6
LOC_Os03g52690.8	Q84R32	CBS domain containing membrane protein	27.7723	27.7953	27.5522	28.6513	28.502	28.8167	27.7723	27.7953	27.5522	28.6513	28.502	28.8167	4	43.2	15.343	0	30.293	25
LOC_Os03g52780.1	Q84R31	expressed protein	NaN	NaN	NaN	25.4554	25.4602	25.4941	24.799	23.4673	23.7661	25.4554	25.4602	25.4941	3	8.7	52.815	0.00030285	2.9213	4
LOC_Os03g52840.1	Q10D68	serine hydroxymethyltransferase	32.4438	32.5122	32.3875	31.1495	31.221	31.2291	32.4438	32.5122	32.3875	31.1495	31.221	31.2291	17	51.5	56.415	0	243.65	122
LOC_Os03g52880.1	Q0DNQ9	BTBN9 - Bric-a-Brac	NaN	NaN	NaN	25.0744	25.0885	25.0017	24.8747	24.9157	22.9881	25.0744	25.0885	25.0017	3	6.4	72.918	0	7.2492	8
LOC_Os03g53230.1	Q84MN8	bifunctional 3-phosphoadenosine 5-phosphosulfate synthetase	27.0055	26.7704	26.8251	26.6084	26.5901	26.7066	27.0055	26.7704	26.8251	26.6084	26.5901	26.7066	7	21.4	52.4	0	23.097	16
LOC_Os03g53270.1	Q7XXR0	stem-specific TSJT1	26.3905	26.2961	26.2148	26.3718	26.2419	26.2572	26.3905	26.2961	26.2148	26.3718	26.2419	26.2572	4	29.5	26.433	0	41.612	17
LOC_Os03g53800.5	Q10CU9	periplasmic beta-glucosidase precursor	29.6067	29.5684	29.442	27.9857	27.9404	27.9815	29.6067	29.5684	29.442	27.9857	27.9404	27.9815	8	24.6	67.777	0	43.486	30
LOC_Os03g53860.4	Q8W2Z2	periplasmic beta-glucosidase precursor	27.2906	27.3664	27.2557	27.643	27.1874	27.4035	27.2906	27.3664	27.2557	27.643	27.1874	27.4035	5	14.1	67.621	0	15.272	26
LOC_Os03g53950.1	Q75LL5	strictosidine synthase	27.7182	27.9467	27.9216	27.8349	28.065	27.9247	27.7182	27.9467	27.9216	27.8349	28.065	27.9247	5	17.7	53.706	0	21.816	23
LOC_Os03g54890.3	Q75J18	ribosomal L13	28.7363	28.7258	28.7745	29.1867	29.2053	29.243	28.7363	28.7258	28.7745	29.1867	29.2053	29.243	4	45.2	13.342	0	13.105	25
LOC_Os03g55070.2	Q9AUV6	UDP-glucose 6-dehydrogenase	25.6699	25.9709	26.1662	27.681	27.6391	27.4649	25.6699	25.9709	26.1662	27.681	27.6391	27.4649	5	18.8	52.898	0	30.613	14
LOC_Os03g55240.1	Q94HA5	cytochrome P450	25.8849	25.6896	NaN	26.7096	27.2377	27.458	25.8849	25.6896	23.1474	26.7096	27.2377	27.458	4	6.8	80.4	0	27.283	9
LOC_Os03g55280.1	Q93Y73	semialdehyde dehydrogenase	26.933	27.1588	26.95	27.5552	27.5582	27.4929	26.933	27.1588	26.95	27.5552	27.5582	27.4929	6	26.4	40.177	0	53.275	18
LOC_Os03g55570.1	Q10EQ6	upstream activation factor subunit spp27	NaN	NaN	NaN	25.7279	25.5932	25.429	24.0302	23.6259	23.9984	25.7279	25.5932	25.429	2	7.8	37.513	0	14.245	7
LOC_Os03g55800.1	Q10EK5	cytochrome P450	25.4968	25.6139	26.2969	26.7922	26.9514	26.7081	25.4968	25.6139	26.2969	26.7922	26.9514	26.7081	6	12.9	56.503	0	9.8529	9
LOC_Os03g55820.1	Q7Y0D4	thioredoxin	28.028	26.8445	26.6492	27.105	27.2695	27.567	28.028	26.8445	26.6492	27.105	27.2695	27.567	4	24	28.572	0	11.216	9
LOC_Os03g56280.1	Q7XZW5	lactate/malate dehydrogenase	31.1439	31.4184	31.2621	31.2229	30.8809	30.7557	31.1439	31.4184	31.2621	31.2229	30.8809	30.7557	10	56.2	37.023	0	111.57	66
LOC_Os03g56300.1	Q7XZW1	4Fe-4S binding domain containing protein	27.8119	28.0284	27.8945	27.9835	28.064	28.0727	27.8119	28.0284	27.8945	27.9835	28.064	28.0727	6	28.7	25.539	0	13.327	23
LOC_Os03g56320.3	Q10E11	expressed protein;LOC_Os03g56320.2 LOC_Os03g56320.2	26.2695	25.9022	26.3986	26.6553	26.7369	26.6661	26.2695	25.9022	26.3986	26.6553	26.7369	26.6661	4	31.5	25.484	0	44.985	8
LOC_Os03g56460.3	P42862	glucose-6-phosphate isomerase	27.1197	26.7338	27.2204	26.7058	26.7405	27.366	27.1197	26.7338	27.2204	26.7058	26.7405	27.366	2	15	55.532	0	17.704	8
LOC_Os03g56670.2	Q8S7H8	photosystem I reaction center subunit III	35.2795	35.2703	35.1368	33.1983	33.0537	33.1277	35.2795	35.2703	35.1368	33.1983	33.0537	33.1277	8	36.9	24.766	0	88.918	191
LOC_Os03g56810.1	P37832	tubulin/FtsZ domain containing protein	NaN	NaN	NaN	27.7871	27.8242	27.3085	24.7272	23.7922	23.8296	27.7871	27.8242	27.3085	2	43.2	49.822	0	34.964	6
LOC_Os03g56840.2	Q9AY71	GTP-binding protein	29.9756	29.8627	29.7052	30.122	30.1117	30.1904	29.9756	29.8627	29.7052	30.122	30.1117	30.1904	11	37.5	45.526	0	135.47	56
LOC_Os03g56970.1	A3ANB5	actin	NaN	23.4282	NaN	24.0537	23.9293	24.3027	24.7725	23.4282	22.8243	24.0537	23.9293	24.3027	2	6.3	44.331	0	5.0606	7
LOC_Os03g57149.1	Q0DMZ3	mTERF domain containing protein	25.9976	26.1279	25.8542	NaN	24.6465	NaN	25.9976	26.1279	25.8542	23.9378	24.6465	24.3887	4	20.6	33.928	0	12.352	11
LOC_Os03g57220.2	Q10CE4	hydroxyacid oxidase 1	31.0537	31.1281	30.918	31.2933	31.3619	31.1424	31.0537	31.1281	30.918	31.2933	31.3619	31.1424	12	53.7	40.383	0	156.96	109
LOC_Os03g57290.1	Q10CD7	cullin	29.4724	29.6003	29.3964	NaN	NaN	NaN	29.4724	29.6003	29.3964	24.8673	24.2401	24.3752	3	3.5	94.702	0	5.4833	9
LOC_Os03g57310.1	Q6F3B4	syntaxin	NaN	NaN	NaN	25.2309	25.275	25.35	22.6202	21.9647	24.1656	25.2309	25.275	25.35	2	7.9	35.611	0	10.133	6
LOC_Os03g57340.1	Q6F3B0	chaperone dnaJ	28.0652	27.7961	27.7079	29.1627	28.7604	29.0908	28.0652	27.7961	27.7079	29.1627	28.7604	29.0908	5	19.4	46.69	0	14.83	17
LOC_Os03g57690.1	Q10C90	aldehyde oxidase	24.8181	NaN	24.8867	24.7746	24.8254	24.7982	24.8181	23.1323	24.8867	24.7746	24.8254	24.7982	4	3.7	145.06	0	7.7439	11
LOC_Os06g09850.3	B9FRZ8	25.3 kDa vesicle transport protein	27.4311	27.1365	27.3885	27.6775	27.773	27.7888	27.4311	27.1365	27.3885	27.6775	27.773	27.7888	5	24.8	23.686	0	52.997	16
LOC_Os03g57840.2	B9F6E8	peptidase M50	28.1584	28.0722	28.0693	25.536	25.6732	25.9577	28.1584	28.0722	28.0693	25.536	25.6732	25.9577	6	21.4	49.768	0	36.32	23
LOC_Os03g58040.3	Q852M0	glutamate dehydrogenase protein	NaN	NaN	NaN	26.2542	26.2827	26.1442	22.9297	23.4429	22.676	26.2542	26.2827	26.1442	4	15.6	44.341	0	8.8043	7
LOC_Os07g07709.1	Q8H590	ribosomal S13p/S18e	30.1528	30.0271	29.9757	30.5618	30.5923	30.5915	30.1528	30.0271	29.9757	30.5618	30.5923	30.5915	6	40.8	17.662	0	65.673	22
LOC_Os03g58204.1	Q7Y1I5	ribosomal L4	28.9417	28.565	29.2614	28.0087	27.3759	27.7038	28.9417	28.565	29.2614	28.0087	27.3759	27.7038	4	28	44.488	0	32.681	19
LOC_Os03g58320.1	Q7Y1J1	indole-3-glycerol phosphate lyase	NaN	NaN	NaN	24.8831	24.6412	24.8683	23.9207	24.075	23.3711	24.8831	24.6412	24.8683	1	6.5	33.474	0.0022297	2.2442	4
LOC_Os03g58430.1	Q851P5	40S ribosomal S15	25.9514	25.9939	26.0617	25.732	25.3518	25.6012	25.9514	25.9939	26.0617	25.732	25.3518	25.6012	2	24.7	17.328	0	11.791	25
LOC_Os03g58470.1	Q851P9	retrotransposon protein	28.1356	27.99	28.0056	24.4185	24.3063	24.08	28.1356	27.99	28.0056	24.4185	24.3063	24.08	3	20.8	29.63	0	28.586	16
LOC_Os03g58630.1	Q851R5	thioredoxin	27.5513	27.5352	27.4985	28.1397	28.1794	28.2117	27.5513	27.5352	27.4985	28.1397	28.1794	28.2117	3	22.4	14.796	0	36.366	16
LOC_Os03g58700.1	Q84SZ6	vacuolar sorting-associated 35	28.0785	27.9493	28.024	28.8983	29.0287	28.9585	28.0785	27.9493	28.024	28.8983	29.0287	28.9585	11	18.7	89.823	0	92.217	54
LOC_Os03g58780.1	Q84SZ4	expressed protein;LOC_Os03g58780.2 LOC_Os03g58780.2	NaN	NaN	NaN	24.4181	24.0709	24.211	23.3288	24.0021	23.2689	24.4181	24.0709	24.211	2	4.4	77.033	0	6.5739	7
LOC_Os03g58790.1	Q84SZ7	ATPase	NaN	NaN	NaN	24.8041	24.8738	24.8645	22.9189	24.3752	23.4403	24.8041	24.8738	24.8645	2	6.2	58.132	0	8.3495	4
LOC_Os07g09600.1	Q69WS1	vesicle-associated membrane protein	28.6716	28.5981	28.5228	28.157	28.2151	28.1798	28.6716	28.5981	28.5228	28.157	28.2151	28.1798	4	19.1	24.778	0	29.531	26
LOC_Os03g58970.1	Q75HJ8	expressed protein;LOC_Os03g58970.2 LOC_Os03g58970.2	26.0615	25.4676	25.8806	27.1338	26.7571	26.8863	26.0615	25.4676	25.8806	27.1338	26.7571	26.8863	4	10.8	70.592	0	23.891	17
LOC_Os03g59020.1	Q75HJ3	T-complex protein	28.971	29.0294	28.9979	29.3476	29.386	29.3133	28.971	29.0294	28.9979	29.3476	29.386	29.3133	13	34.6	58.783	0	117.53	60
LOC_Os03g59050.1	Q75HJ0	DEAD-box ATP-dependent RNA helicase	26.2349	26.3354	26.2077	26.1719	26.0096	26.2094	26.2349	26.3354	26.2077	26.1719	26.0096	26.2094	4	26.4	67.665	0	17.447	11
LOC_Os03g59060.2	Q10BT5	OsPP2Ac-2 - Phosphatase 2A isoform 2 belonging to family 2	25.5861	25.9074	25.8117	25.8926	25.8205	25.8876	25.5861	25.9074	25.8117	25.8926	25.8205	25.8876	2	11.1	35.242	0	16.366	10
LOC_Os03g59220.1	Q84M34	cytochrome b-c1 complex subunit 7	29.5257	29.9215	29.4024	30.075	30.0231	30.2714	29.5257	29.9215	29.4024	30.075	30.0231	30.2714	8	59.5	15.035	0	58.236	51
LOC_Os03g59310.1	Q84M35	ribosomal protein	29.5837	29.342	29.5556	29.3689	29.2031	29.202	29.5837	29.342	29.5556	29.3689	29.2031	29.202	7	31	29.975	0	112.94	42
LOC_Os03g59320.1	Q84M38	expressed protein	26.202	25.6451	26.0088	27.3264	27.288	27.2644	26.202	25.6451	26.0088	27.3264	27.288	27.2644	2	13.3	22.226	0	34.943	10
LOC_Os03g59390.1	Q75GE8	CAMK_CAMK_like.24 - CAMK includes calcium/calmodulin depedent kinases	27.3054	27.3462	27.4305	28.5477	28.4921	28.4193	27.3054	27.3462	27.4305	28.5477	28.4921	28.4193	7	18.6	60.657	0	37.65	32
LOC_Os03g59590.1	Q6ATR5	ATP/GTP/Ca++ binding protein	29.9461	29.919	29.8847	30.112	30.2317	30.1388	29.9461	29.919	29.8847	30.112	30.2317	30.1388	18	34.7	71.371	0	323.31	81
LOC_Os03g59640.1	Q6ATS0	magnesium-chelatase subunit chlD	29.8702	29.852	29.7337	29.5363	29.5808	29.6045	29.8702	29.852	29.7337	29.5363	29.5808	29.6045	21	33.7	81.878	0	104.64	60
LOC_Os03g59750.1	Q10CA4	DNA gyrase subunit A	24.8797	25.0889	25.15	25.7128	NaN	25.7685	24.8797	25.0889	25.15	25.7128	23.3705	25.7685	2	9.6	39.121	0	12.157	5
LOC_Os03g60090.2	Q10BJ6	methylenetetrahydrofolate reductase	25.4634	25.4001	25.535	26.0571	26.1669	26.9139	25.4634	25.4001	25.535	26.0571	26.1669	26.9139	4	10.8	64.069	0	6.9681	6
LOC_Os03g60100.1	Q75GR6	50S ribosomal L17	28.8071	28.7111	28.5347	27.8187	27.6887	27.7925	28.8071	28.7111	28.5347	27.8187	27.6887	27.7925	4	17.6	22.961	0	8.5538	13
LOC_Os03g60370.1	Q84TX6	histidine acid phosphatase	NaN	25.5486	NaN	25.3016	25.3596	25.5632	23.6478	25.5486	22.7649	25.3016	25.3596	25.5632	5	17.7	57.988	0	13.715	9
LOC_Os03g60460.1	Q84TA3	aminopeptidase	26.3669	26.6835	26.6506	27.7193	27.644	27.6779	26.3669	26.6835	26.6506	27.7193	27.644	27.6779	7	14.1	67.791	0	14.736	21
LOC_Os03g60509.2	Q84T92	expressed protein	26.1646	25.5814	25.9744	26.3957	26.2773	26.6678	26.1646	25.5814	25.9744	26.3957	26.2773	26.6678	3	16.7	23.893	0	22.663	16
LOC_Os03g60530.1	Q84TA8	ras-related protein	28.2783	27.9055	28.0075	NaN	NaN	NaN	28.2783	27.9055	28.0075	24.6722	23.6538	23.1842	2	16.8	23.779	0	11.936	8
LOC_Os03g60620.1	Q84TA1	DnaK family protein	25.7193	26.3747	26.1628	26.7593	26.3373	26.4062	25.7193	26.3747	26.1628	26.7593	26.3373	26.4062	2	34.7	71.311	0	9.9794	13
LOC_Os03g60820.1	Q10BC6	transporter	30.1875	30.5042	30.0541	29.9389	29.4826	30.2107	30.1875	30.5042	30.0541	29.9389	29.4826	30.2107	4	8.3	57.875	0	14.037	20
LOC_Os03g60910.1	Q852B8	PPR repeat domain containing protein	26.7878	27.1042	26.9526	25.1144	25.3741	25.2667	26.7878	27.1042	26.9526	25.1144	25.3741	25.2667	7	11.5	95.977	0	32.668	14
LOC_Os03g60939.1	Q10BB4	dolichyl-phosphate beta-glycosyltransferase	25.8569	25.6466	25.5258	26.3293	26.4903	26.5078	25.8569	25.6466	25.5258	26.3293	26.4903	26.5078	3	16.5	27.113	0	68.969	10
LOC_Os03g61050.1	Q10BA5	FG-GAP repeat-containing protein	25.6972	25.813	25.498	26.1749	26.2838	26.8511	25.6972	25.813	25.498	26.1749	26.2838	26.8511	6	9.4	94.842	0	10.862	16
LOC_Os03g61090.1	Q94GE8	expressed protein	32.0166	31.949	31.8774	30.2709	30.1706	30.3605	32.0166	31.949	31.8774	30.2709	30.1706	30.3605	5	42	11.876	0	281.45	42
LOC_Os03g61220.2	Q0DM51	DEAD-box ATP-dependent RNA helicase 3	30.8338	30.8413	30.8926	30.0434	29.8522	29.94	30.8338	30.8413	30.8926	30.0434	29.8522	29.94	23	43.6	81.527	0	319.77	104
LOC_Os03g61260.4	Q8SAY0	ribosomal L18p/L5e family protein	27.975	27.7203	27.7095	28.2916	27.9601	28.1684	27.975	27.7203	27.7095	28.2916	27.9601	28.1684	3	29.7	11.007	0	9.5082	9
LOC_Os03g61600.1	Q850Z8	phosphoribosylformylglycinamidine synthase	24.426	24.5607	24.6033	NaN	NaN	NaN	24.426	24.5607	24.6033	22.8046	23.4426	23.5776	3	14.1	41.749	0	8.5183	5
LOC_Os03g61890.2	Q75LI9	chloroplast import component Toc159	27.0132	26.3621	26.8764	NaN	25.0824	NaN	27.0132	26.3621	26.8764	23.2639	25.0824	23.5944	8	11.4	131.13	0	17	14
LOC_Os03g61920.1	Q75LJ3	electron transfer flavosubunit alpha	NaN	NaN	NaN	27.4627	27.3572	27.6371	23.38	24.2383	22.5645	27.4627	27.3572	27.6371	3	16.5	37.352	0	34.359	10
LOC_Os03g62010.1	Q75LJ9	harpin-induced 1 domain containing protein	25.2182	25.0829	NaN	26.1883	27.0247	26.9157	25.2182	25.0829	23.9622	26.1883	27.0247	26.9157	4	16.5	22.799	0	29.737	10
LOC_Os03g62180.3	Q851M7	lectin kinase family protein	24.9894	25.177	25.1565	26.2339	26.3548	26.3572	24.9894	25.177	25.1565	26.2339	26.3548	26.3572	4	4.8	91.771	0	15.477	9
LOC_Os03g62370.1	Q6AVR6	WD40-like Beta Propeller Repeat family protein	23.3372	NaN	23.6523	25.0178	25.3093	24.5143	23.3372	23.195	23.6523	25.0178	25.3093	24.5143	3	7.6	73.674	0	12.98	7
LOC_Os03g62490.1	Q10AT9	prohibitin-2	26.7203	26.5173	26.7782	27.0304	27.2316	27.1204	26.7203	26.5173	26.7782	27.0304	27.2316	27.1204	2	20.3	32.19	0	12.973	14
LOC_Os03g62510.1	Q10AT7	amine oxidase	25.4504	25.4743	25.2767	NaN	NaN	NaN	25.4504	25.4743	25.2767	23.4181	23.8662	23.0829	3	9.4	63.831	0	16.254	10
LOC_Os03g62600.1	Q75LE2	ras-related protein	25.803	26.3863	26.3251	26.3931	26.3141	26.5611	25.803	26.3863	26.3251	26.3931	26.3141	26.5611	3	23.3	24.482	0	22.8	11
LOC_Os03g62620.4	Q75LD9	late embryogenesis abundant protein	27.7534	27.9936	27.7831	29.8751	29.8061	29.6242	27.7534	27.9936	27.7831	29.8751	29.8061	29.6242	10	41.5	34.798	0	46.113	45
LOC_Os03g62630.1	Q75LD8	ribosomal S6	27.6325	27.751	27.8432	27.8796	27.9453	27.9724	27.6325	27.751	27.8432	27.8796	27.9453	27.9724	3	16.4	23.309	0	16.376	18
LOC_Os03g62700.1	Q75LD0	kinase	27.5182	27.5745	27.2258	28.1663	28.0803	28.0249	27.5182	27.5745	27.2258	28.1663	28.0803	28.0249	7	38.6	40.775	0	89.378	31
LOC_Os03g62780.1	Q75LC1	S1 RNA binding domain containing protein	26.6744	26.7041	26.9704	26.539	26.3784	26.5644	26.6744	26.7041	26.9704	26.539	26.3784	26.5644	4	15.6	41.137	0	17.142	14
LOC_Os03g62850.1	Q75LB3	AMP-binding enzyme	28.0259	28.1353	28.1255	27.9685	27.9402	27.857	28.0259	28.1353	28.1255	27.9685	27.9402	27.857	12	20.7	83.21	0	81.719	24
LOC_Os03g63250.2	Q84LH7	brefeldin A-sensitive Golgi protein-like	25.143	24.9929	25.1358	25.1306	25.2906	25.033	25.143	24.9929	25.1358	25.1306	25.2906	25.033	4	8.2	71.42	0	8.691	9
LOC_Os03g63310.1	Q84JR8	cytochrome P450 71E1	25.2737	NaN	24.9598	25.4337	25.4298	25.3203	25.2737	23.0279	24.9598	25.4337	25.4298	25.3203	3	8.9	58.289	0	12.802	6
LOC_Os03g63360.1	Q851Z3	glutathione S-transferase	27.5201	27.4943	27.5385	NaN	NaN	NaN	27.5201	27.4943	27.5385	23.8824	24.4102	23.9504	3	21.7	30.255	0	15.547	9
LOC_Os03g63410.1	Q851Y8	elongation factor Tu	29.1518	29.0136	29.0387	30.0812	30.2456	30.1245	29.1518	29.0136	29.0387	30.0812	30.2456	30.1245	11	37.5	48.423	0	105.65	65
LOC_Os03g63420.1	Q851Y7	OsGrx_S14 - glutaredoxin subgroup II	27.954	27.9384	27.8412	26.883	27.1363	26.6453	27.954	27.9384	27.8412	26.883	27.1363	26.6453	2	16.7	17.833	0	13.734	17
LOC_Os03g63430.2	Q851Y6	proteasome subunit	26.9944	26.9053	27.47	27.5489	27.249	27.5307	26.9944	26.9053	27.47	27.5489	27.249	27.5307	8	19.2	50.519	0	13.007	19
LOC_Os03g63480.1	Q851Y1	ankyrin repeat domain containing protein	NaN	26.8326	26.7961	26.4123	26.2915	26.4996	22.6137	26.8326	26.7961	26.4123	26.2915	26.4996	2	12	37.234	0	5.9802	7
LOC_Os03g63520.1	Q851X7	Der1-like family domain containing protein	24.6365	24.7578	24.7465	25.8225	25.693	25.0255	24.6365	24.7578	24.7465	25.8225	25.693	25.0255	2	12.9	28.462	0	15.384	7
LOC_Os03g63580.1	Q84JU8	phosphoesterase family protein	NaN	NaN	NaN	25.6975	25.4471	25.3008	24.0587	24.0402	22.642	25.6975	25.4471	25.3008	2	6.5	57.962	0	4.1597	5
LOC_Os03g63590.1	Q84JJ2	metallo-beta-lactamase	24.9312	24.6514	25.4196	25.8918	25.981	26.0557	24.9312	24.6514	25.4196	25.8918	25.981	26.0557	5	10.4	77.813	0	11.974	14
LOC_Os03g63860.1	Q75IQ4	DANA2	30.4064	30.1955	30.0798	30.3621	30.6746	30.7363	30.4064	30.1955	30.0798	30.3621	30.6746	30.7363	10	54	24.234	0	270.33	47
LOC_Os03g63910.1	Q75IP8	PPR repeat domain containing protein	26.2162	26.1628	26.18	24.4945	NaN	NaN	26.2162	26.1628	26.18	24.4945	24.8423	24.2586	4	5.6	88.844	0	9.1362	5
LOC_Os03g63940.1	Q84M80	CBS domain containing membrane protein	25.2302	25.234	25.3504	26.0241	26.3103	26.3806	25.2302	25.234	25.3504	26.0241	26.3103	26.3806	5	12.6	54.492	0	15.725	11
LOC_Os03g63950.1	Q84M68	plastid-specific 30S ribosomal 1	28.2722	28.2344	28.5002	28.7374	28.7625	28.9777	28.2722	28.2344	28.5002	28.7374	28.7625	28.9777	5	18.8	34.156	0	37.09	29
LOC_Os03g64020.2	Q84M73	expressed protein;LOC_Os03g64020.1 LOC_Os03g64020.1	30.6038	30.7667	30.828	29.7494	29.7914	29.5804	30.6038	30.7667	30.828	29.7494	29.7914	29.5804	8	39.5	35.993	0	91.38	82
LOC_Os03g64080.1	Q10AB7	retrotransposon protein	27.3519	27.2357	27.267	27.0304	26.8877	26.7974	27.3519	27.2357	27.267	27.0304	26.8877	26.7974	8	5.2	233.94	0	33.688	21
LOC_Os03g64110.1	Q84M69	WD domain	NaN	NaN	NaN	25.405	25.1996	25.2058	22.3578	22.1044	23.2934	25.405	25.1996	25.2058	2	5.6	47.251	0	18.436	10
LOC_Os03g64140.1	Q84M78	expressed protein	27.5249	27.4906	27.582	NaN	NaN	NaN	27.5249	27.4906	27.582	23.8469	25.039	23.3179	2	15	23.703	0	25.343	7
LOC_Os03g64210.1	Q7X9A7	T-complex protein	26.0698	26.2914	26.4267	26.8388	26.6915	26.5703	26.0698	26.2914	26.4267	26.8388	26.6915	26.5703	4	17.8	61.4	0	23.827	12
LOC_Os03g64400.2	Q10A81	oxidoreductase/ transition metal ion binding protein	26.8777	26.8597	27.1481	27.4651	27.5782	27.5027	26.8777	26.8597	27.1481	27.4651	27.5782	27.5027	7	17.1	67.242	0	28.616	14
LOC_Os04g01240.1	Q7XTB4	serine-type peptidase	24.5619	NaN	NaN	26.3001	26.3151	25.6764	24.5619	23.8454	23.4758	26.3001	26.3151	25.6764	2	15.5	23.287	0	6.3525	11
LOC_Os04g01250.2	Q0JFH7	amidase family protein	27.8983	27.5949	27.7201	29.3468	29.3279	29.4026	27.8983	27.5949	27.7201	29.3468	29.3279	29.4026	10	26.2	66.547	0	81.471	45
LOC_Os04g01290.1	Q0JFH5	proteasome subunit	28.0218	27.9646	27.8842	27.7975	27.8763	27.7473	28.0218	27.9646	27.8842	27.7975	27.8763	27.7473	10	31.2	46.363	0	69.563	33
LOC_Os04g01300.4	Q7XXJ6	OsRhmbd10 - Putative Rhomboid homologue	27.1423	27.3958	27.6877	27.6779	27.6559	27.8593	27.1423	27.3958	27.6877	27.6779	27.6559	27.8593	3	25.5	28.801	0	13.104	14
LOC_Os04g01540.1	Q84VC9	expressed protein	26.8923	27.0296	27.3096	26.6444	25.7774	NaN	26.8923	27.0296	27.3096	26.6444	25.7774	23.5708	7	37.1	28.736	0	51.527	17
LOC_Os04g02050.2	Q7XQC9	bifunctional 3-phosphoadenosine 5-phosphosulfate synthetase	28.7067	28.6571	28.5774	27.6837	27.7472	27.7228	28.7067	28.6571	28.5774	27.6837	27.7472	27.7228	8	33.2	37.338	0	51.8	35
LOC_Os04g02670.1	Q7XT14	hypothetical protein	26.9075	26.8683	26.7879	28.092	27.6716	27.7003	26.9075	26.8683	26.7879	28.092	27.6716	27.7003	2	61.5	5.2901	0	32.168	15
LOC_Os04g04020.1	Q0JF82	transport Sec24-like	27.7712	27.8784	27.7387	27.8976	27.773	28.0014	27.7712	27.8784	27.7387	27.8976	27.773	28.0014	12	18.2	112.06	0	106.31	41
LOC_Os04g04254.2	Q7XRN9	sterol 3-beta-glucosyltransferase	25.9599	25.7868	25.9207	26.8037	26.76	26.9171	25.9599	25.7868	25.9207	26.8037	26.76	26.9171	3	8.7	63.355	0	8.1651	10
LOC_Os04g08350.2	Q7XS58	cysteine synthase	25.9483	25.9811	25.8435	26.3251	26.3017	26.1173	25.9483	25.9811	25.8435	26.3251	26.3017	26.1173	5	19.6	40.153	0	11.554	7
LOC_Os04g10400.1	Q7F9U3	electron transfer flavosubunit beta	NaN	NaN	NaN	25.9019	25.7432	25.6176	23.279	24.6753	24.4873	25.9019	25.7432	25.6176	4	28.1	27.469	0	10.167	7
LOC_Os04g14790.1	Q7XSW7	FAD dependent oxidoreductase domain containing protein	25.426	25.4121	25.713	24.8853	24.9708	24.9765	25.426	25.4121	25.713	24.8853	24.9708	24.9765	3	5.6	68.351	0	12.508	9
LOC_Os04g15690.1	Q7XNV4	DSBA-like thioredoxin domain containing protein	NaN	NaN	NaN	26.1033	26.1264	25.9716	23.5855	23.0578	23.4946	26.1033	26.1264	25.9716	1	7.1	24.858	0	3.8996	4
LOC_Os04g16450.1	Q7XLR1	aquaporin protein	30.8394	31.0209	31.1348	32.2399	32.142	32.1322	30.8394	31.0209	31.1348	32.2399	32.142	32.1322	2	8.3	36.5	0	57.624	31
LOC_Os04g16680.1	Q7XRT0	fructose-1	29.6947	29.725	29.6941	28.8608	28.9658	28.9657	29.6947	29.725	29.6941	28.8608	28.9658	28.9657	7	23	42.244	0	42.299	36
LOC_Os10g21394.1	A0A0K0LRC8	NADPH-dependent oxidoreductase	31.5402	31.4599	31.5471	29.5264	29.5388	29.4401	31.5402	31.4599	31.5471	29.5264	29.5388	29.4401	14	48.9	45.612	0	283.81	85
LOC_Os10g38214.1	E9KIP2	chloroplast 30S ribosomal S4	30.6936	30.5156	30.2544	28.8361	28.3697	28.8478	30.6936	30.5156	30.2544	28.8361	28.3697	28.8478	8	37.8	23.422	0	39.518	44
LOC_Os04g16740.1	Q7DNB0	ATP synthase subunit alpha	37.2637	37.1358	37.1641	36.0429	36.1966	36.2879	37.2637	37.1358	37.1641	36.0429	36.1966	36.2879	23	58	55.664	0	323.31	900
LOC_Os10g21372.1	Q6YTM6	chloroplast 30S ribosomal S7	28.4871	28.6722	28.6623	28.3939	28.321	28.4976	28.4871	28.6722	28.6623	28.3939	28.321	28.4976	5	28.8	17.629	0	20.434	18
LOC_Os10g38272.1	Q8RVD3	ATP synthase B chain	33.7447	33.7898	33.4864	32.2568	32.1766	32.3504	33.7447	33.7898	33.4864	32.2568	32.1766	32.3504	7	28.4	20.956	0	126.97	100
LOC_Os10g21192.1	Q8S6H1	photosystem Q	35.4341	35.4272	35.3923	32.7969	32.6612	32.7889	35.4341	35.4272	35.3923	32.7969	32.6612	32.7889	8	27.8	38.99	0	233.5	197
LOC_Os10g21354.1	P0C497	chloroplast 50S ribosomal L2	29.1258	28.8284	28.5117	27.9174	27.6542	28.0852	29.1258	28.8284	28.5117	27.9174	27.6542	28.0852	4	27.5	29.922	0	20.501	18
LOC_Os04g16820.1	Q7XM77	DNA-directed RNA polymerase subunit beta	25.0832	25.4803	25.354	25.1902	24.9967	25.0334	25.0832	25.4803	25.354	25.1902	24.9967	25.0334	4	5.5	120.78	0	17.912	7
LOC_Os10g21346.1	E9KIR8	chloroplast 30S ribosomal S3	30.3006	30.6343	30.1701	28.0987	28.0241	28.2021	30.3006	30.6343	30.1701	28.0987	28.0241	28.2021	8	38.1	27.517	0	34.886	38
LOC_Os08g15278.1	E9KIR6	chloroplast 30S ribosomal S8	31.2417	31.1436	31.234	29.6422	29.7517	29.6646	31.2417	31.1436	31.234	29.6422	29.7517	29.6646	6	41.9	15.61	0	95.435	44
LOC_Os10g21326.1	Q5N9A0	cytochrome b6-f complex subunit 4	32.382	32.0997	32.3897	31.9803	32.0645	32.3416	32.382	32.0997	32.3897	31.9803	32.0645	32.3416	2	10.6	17.503	0	24.125	29
LOC_Os06g39704.1	Q6Z506	photosystem II reaction center H	34.8095	34.7241	34.6364	33.7624	33.5985	33.7646	34.8095	34.7241	34.6364	33.7624	33.5985	33.7646	1	19.2	7.8861	0	43.639	43
LOC_Os04g20220.1	B9FE55	elongation factor Tu	26.4145	26.0583	26.2207	26.0464	26.6263	26.1195	26.4145	26.0583	26.2207	26.0464	26.6263	26.1195	5	10.1	59.851	0	13.487	12
LOC_Os04g20230.1	Q7XWV6	neighbor of COX4	26.1788	26.4569	26.2724	27.2322	27.2425	27.301	26.1788	26.4569	26.2724	27.2322	27.2425	27.301	5	21.5	22.723	0	10.825	20
LOC_Os04g22360.1	Q7XRQ7	DUF647 domain containing protein	NaN	NaN	NaN	25.4028	25.5875	25.6278	23.8199	23.2499	23.0886	25.4028	25.5875	25.6278	2	4.7	63.227	0	8.7235	8
LOC_Os04g23890.3	Q9ST27	AGC_PVPK_like_kin82y.10 - ACG kinases include homologs to PKA	28.8357	28.8699	28.7421	29.4821	29.6041	29.614	28.8357	28.8699	28.7421	29.4821	29.6041	29.614	13	21.2	100.22	0	119.52	46
LOC_Os04g24110.1	Q0JEA6	anthocyanin 3-O-beta-glucosyltransferase	26.079	26.2343	26.5419	25.484	NaN	NaN	26.079	26.2343	26.5419	25.484	23.8706	23.1552	2	7.9	51.766	0	16.236	8
LOC_Os04g24430.1	H6TFZ4	sucrose synthase	26.5251	26.1908	26.2369	27.6685	27.6512	27.7876	26.5251	26.1908	26.2369	27.6685	27.6512	27.7876	5	11.3	97.811	0	13.064	23
LOC_Os04g24520.1	Q7XNR1	ribosomal L51	27.8039	27.5732	27.6613	28.3673	28.4372	28.5473	27.8039	27.5732	27.6613	28.3673	28.4372	28.5473	3	32.9	8.0062	0	8.1695	10
LOC_Os04g25400.2	Q7XTG7	uncharacterized all1601	28.2678	28.4726	28.1418	27.296	27.078	26.9807	28.2678	28.4726	28.1418	27.296	27.078	26.9807	5	26.1	33.946	0	26.205	35
LOC_Os04g26841.1	B9FEH2	importin-8	26.3219	26.0001	26.1615	26.4531	26.1036	25.9889	26.3219	26.0001	26.1615	26.4531	26.1036	25.9889	4	6.3	84.696	0	13.063	16
LOC_Os04g26910.1	Q7XT99	oxidoreductase	24.3791	NaN	24.364	25.7219	25.8593	25.9186	24.3791	23.5122	24.364	25.7219	25.8593	25.9186	3	10.8	38.233	0	10.841	12
LOC_Os04g28180.1	Q0JDZ7	ribosomal protein	28.3031	28.2948	28.5086	29.2673	29.2376	29.2831	28.3031	28.2948	28.5086	29.2673	29.2376	29.2831	1	31.7	24.928	0	90.207	23
LOC_Os04g28620.1	Q7XRZ6	male sterility protein	25.6539	25.4042	25.7359	NaN	NaN	NaN	25.6539	25.4042	25.7359	23.7364	24.402	22.7737	4	6.6	56.729	0	10.566	8
LOC_Os04g30420.1	Q7XVK0	dehydrogenase	26.3476	26.7182	26.5106	27.2157	27.2858	27.2089	26.3476	26.7182	26.5106	27.2157	27.2858	27.2089	6	20.5	34.671	0	19.655	18
LOC_Os04g30430.1	Q7XVK1	nuclear transport factor 2	27.8531	27.5956	27.8558	26.1054	26.3509	26.216	27.8531	27.5956	27.8558	26.1054	26.3509	26.216	3	16.5	51.445	0	36.333	12
LOC_Os04g30760.1	Q7XMI8	3-oxoacyl-reductase	29.1308	28.9302	29.0754	29.1371	28.9569	29.0449	29.1308	28.9302	29.0754	29.1371	28.9569	29.0449	5	20.1	32.641	0	54.511	30
LOC_Os04g30780.1	Q7XMI6	eukaryotic translation initiation factor 3 subunit H	26.9241	27.2679	27.0421	27.5298	27.4955	27.4068	26.9241	27.2679	27.0421	27.5298	27.4955	27.4068	3	15.3	39.156	0	38.136	18
LOC_Os04g31320.1	Q7XVB8	SWIB/MDM2 domain containing protein	25.0066	25.7991	25.577	NaN	NaN	NaN	25.0066	25.7991	25.577	24.0485	24.0993	23.9284	3	11.2	51.481	0	8.1072	8
LOC_Os04g31340.1	Q7XVC0	CBS domain containing membrane protein	25.1946	24.8572	25.0229	26.2863	26.2458	26.2504	25.1946	24.8572	25.0229	26.2863	26.2458	26.2504	2	4.7	46.855	0	3.9018	11
LOC_Os04g31700.1	Q7XLP7	methylisocitrate lyase 2	25.1337	24.849	25.7998	25.9489	26.0789	25.9745	25.1337	24.849	25.7998	25.9489	26.0789	25.9745	2	8.7	41.319	0	7.496	8
LOC_Os04g32020.1	A0A0P0W9W2	2-oxoglutarate dehydrogenase E1 component	26.5668	26.3173	26.6084	28.34	28.1112	28.145	26.5668	26.3173	26.6084	28.34	28.1112	28.145	6	15	103.25	0	37.126	19
LOC_Os04g32330.2	Q7XVM2	dihydrolipoyllysine-residue succinyltransferase component of 2-oxoglutarate dehydrogenase complex	25.7773	25.8378	25.6166	29.1464	29.3324	29.2262	25.7773	25.8378	25.6166	29.1464	29.3324	29.2262	4	11.6	48.127	0	14.644	26
LOC_Os04g32560.2	Q7F9I1	ATP-dependent Clp protease ATP-binding subunit clpA homolog CD4B	32.0881	32.2518	32.0854	32.0586	32.0314	31.9295	32.0881	32.2518	32.0854	32.0586	32.0314	31.9295	16	54.5	101.8	0	323.31	117
LOC_Os04g32650.1	Q7XLG5	tRNA synthetase class II core domain containing protein	NaN	25.1881	24.8902	26.2458	25.5939	25.5452	24.0731	25.1881	24.8902	26.2458	25.5939	25.5452	2	4.9	74.739	0	5.684	6
LOC_Os04g32660.1	Q7XLG4	cytochrome b-c1 complex subunit Rieske	29.2489	29.3743	29.2565	30.0963	30.0971	30.1094	29.2489	29.3743	29.2565	30.0963	30.0971	30.1094	7	30.6	30.095	0	190.06	43
LOC_Os04g32950.1	Q7XV86	calreticulin precursor protein	31.0458	31.0377	30.8354	30.9901	30.9054	30.9384	31.0458	31.0377	30.8354	30.9901	30.9054	30.9384	17	37.1	60.729	0	114.85	94
LOC_Os04g33060.1	Q7XVF8	NAD dependent epimerase/dehydratase family protein	28.2122	28.5791	28.1123	28.1819	28.2607	28.0964	28.2122	28.5791	28.1123	28.1819	28.2607	28.0964	4	14.1	33.266	0	19.767	24
LOC_Os04g33190.1	A0A0P0WAB9	AMP-binding enzyme	27.082	27.1769	27.2216	27.2579	27.1608	27.3293	27.082	27.1769	27.2216	27.2579	27.1608	27.3293	4	8.2	81.669	0	28.048	12
LOC_Os04g33210.1	Q7XL03	ERD1 protein	NaN	24.8768	NaN	24.9695	25.0385	25.0505	23.6289	24.8768	23.8215	24.9695	25.0385	25.0505	5	14.1	93.255	0	9.9099	10
LOC_Os04g33220.1	A0A0P0W9R6	SAM domain family protein	29.928	29.8932	30.077	29.9073	29.8114	30.0074	29.928	29.8932	30.077	29.9073	29.8114	30.0074	6	28.2	27.703	0	59.882	45
LOC_Os04g33280.3	B7EF30	expressed protein;LOC_Os04g33280.2 LOC_Os04g33280.2	25.1515	NaN	25.5896	26.1937	26.2584	26.4154	25.1515	24.3671	25.5896	26.1937	26.2584	26.4154	2	20	22.306	0	7.9431	10
LOC_Os04g34100.1	Q0JDA2	expressed protein	28.5123	28.1628	28.305	28.6977	28.8368	28.7796	28.5123	28.1628	28.305	28.6977	28.8368	28.7796	5	31.2	24.583	0	58.256	24
LOC_Os04g34450.1	Q0JD86	expressed protein	27.3937	27.3335	27.1907	28.1894	28.3135	28.2814	27.3937	27.3335	27.1907	28.1894	28.3135	28.2814	15	16.9	122.74	0	50.572	33
LOC_Os04g35100.1	Q0JD56	phospholipase C	NaN	NaN	NaN	25.2636	25.1548	25.1183	23.9794	24.9068	23.4108	25.2636	25.1548	25.1183	3	12.6	45.005	0	4.6128	4
LOC_Os04g35180.1	Q7XQP9	co-chaperone GrpE protein	26.492	26.6966	26.5198	25.0657	25.2093	25.2056	26.492	26.6966	26.5198	25.0657	25.2093	25.2056	4	32.2	26.652	0	16.11	12
LOC_Os04g35280.1	Q0JD43	neutral/alkaline invertase	NaN	NaN	NaN	25.6409	25.4458	25.791	24.3011	24.4239	22.691	25.6409	25.4458	25.791	3	5.7	64.411	0	6.156	3
LOC_Os04g35290.1	Q0JD42	OsPDIL5-2 disulfide isomerase PDIL5-2	28.2527	28.2449	28.124	29.4941	29.4487	29.3561	28.2527	28.2449	28.124	29.4941	29.4487	29.3561	7	23.6	47.055	0	46.826	29
LOC_Os04g35560.2	Q7XUT1	glutathione S-transferase	25.0412	25.4585	25.2008	25.0533	NaN	24.9947	25.0412	25.4585	25.2008	25.0533	24.2649	24.9947	3	16.2	31.154	0	9.0891	13
LOC_Os04g35900.1	Q0JD02	translocon Tic40	28.7425	28.646	28.6254	28.4439	28.3792	28.4295	28.7425	28.646	28.6254	28.4439	28.3792	28.4295	10	28.4	46.325	0	35.143	37
LOC_Os04g36050.1	Q7FA04	cleft lip and palate transmembrane 1	27.2321	27.2145	27.3536	28.1058	28.4044	28.1236	27.2321	27.2145	27.3536	28.1058	28.4044	28.1236	7	20.8	69.53	0	94.094	27
LOC_Os04g36560.2	Q8LPA2	chloride channel protein	25.7914	25.7706	25.6763	26.4035	26.0226	26.0054	25.7914	25.7706	25.6763	26.4035	26.0226	26.0054	3	5.9	86.692	0	10.883	9
LOC_Os04g36700.1	Q7X5X9	proteasome subunit	27.6865	27.164	27.3975	27.3773	27.7982	27.6449	27.6865	27.164	27.3975	27.3773	27.7982	27.6449	9	29.9	47.596	0	26.927	22
LOC_Os04g36800.2	B7F6I0	3-oxoacyl-synthase	NaN	27.2936	27.4337	28.02	28.3108	28.3653	22.9689	27.2936	27.4337	28.02	28.3108	28.3653	3	19.1	48.639	0	19.332	11
LOC_Os04g36850.1	Q7XUX3	ORG4	26.0272	25.9033	26.0026	25.5935	25.7723	25.5896	26.0272	25.9033	26.0026	25.5935	25.7723	25.5896	4	32.7	22.262	0	8.8182	10
LOC_Os04g37619.1	Q0JCU7	zeaxanthin epoxidase	29.9249	29.9401	29.856	29.0476	29.1716	29.2676	29.9249	29.9401	29.856	29.0476	29.1716	29.2676	19	37.8	71.798	0	108.1	64
LOC_Os04g37760.1	B9FFG0	expressed protein	NaN	NaN	NaN	27.07	26.8049	26.5159	23.3556	23.5296	23.0108	27.07	26.8049	26.5159	3	27	20.64	0	7.6691	5
LOC_Os04g37904.2	Q7XQU7	phosphatase 2C	NaN	24.9742	25.1772	27.1453	26.9981	27.1281	23.0153	24.9742	25.1772	27.1453	26.9981	27.1281	4	22.3	30.881	0	26.262	11
LOC_Os04g38390.1	Q7XRE7	wound/stress protein	29.4688	29.4629	29.6113	31.7598	31.7287	31.5385	29.4688	29.4629	29.6113	31.7598	31.7287	31.5385	2	22.3	20.537	0	67.341	38
LOC_Os04g38410.1	Q7XV11	chlorophyll A-B binding protein	35.764	36.1966	36.5556	33.3128	33.2629	33.0155	35.764	36.1966	36.5556	33.3128	33.2629	33.0155	11	44.8	27.06	0	191.54	191
LOC_Os04g38480.2	Q7XV05	BRASSINOSTEROID INSENSITIVE 1-associated receptor kinase 1 precursor	26.493	26.2811	26.3735	27.6319	27.487	27.1994	26.493	26.2811	26.3735	27.6319	27.487	27.1994	3	7.8	65.818	0	8.3876	10
LOC_Os04g38600.3	Q7X8A1	glyceraldehyde-3-phosphate dehydrogenase	34.6204	34.5005	34.4836	33.3848	33.5095	33.4207	34.6204	34.5005	34.4836	33.3848	33.5095	33.4207	11	39.3	42.715	0	323.31	133
LOC_Os04g38640.2	B7EBF9	OsDegp5 - Putative Deg protease homologue	27.0108	27.2613	27.0816	28.3035	28.3141	28.2362	27.0108	27.2613	27.0816	28.3035	28.3141	28.2362	6	22.6	40.821	0	27.993	23
LOC_Os04g38750.1	Q7XUV4	plastid-specific 30S ribosomal 3	25.3786	25.5691	25.506	25.7591	25.8324	26.0295	25.3786	25.5691	25.506	25.7591	25.8324	26.0295	1	4.4	19.956	0.0067114	1.7175	11
LOC_Os04g38870.5	Q0JCM0	14-3-3 protein	28.3903	28.4685	28.2612	29.8231	29.7285	29.9385	28.3903	28.4685	28.2612	29.8231	29.7285	29.9385	4	52.7	29.863	0	65.489	50
LOC_Os04g38900.2	Q6MWE2	prohibitin	30.3953	30.3579	30.3153	31.6001	31.5871	31.5279	30.3953	30.3579	30.3153	31.6001	31.5871	31.5279	5	43.2	30.802	0	301.05	94
LOC_Os04g39140.1	Q7XUY6	acetyltransferase	27.2179	27.0325	27.094	26.832	26.8644	26.7251	27.2179	27.0325	27.094	26.832	26.8644	26.7251	5	23.7	34.542	0	27.278	21
LOC_Os04g39700.1	Q7XR19	60S ribosomal L6	28.2231	28.5062	28.1235	28.0868	27.8861	28.4164	28.2231	28.5062	28.1235	28.0868	27.8861	28.4164	6	39.6	24.628	0	27.82	23
LOC_Os04g40080.1	Q7XK44	leucine rich repeat containing protein	NaN	25.791	25.7667	26.2718	26.3234	26.2196	23.5674	25.791	25.7667	26.2718	26.3234	26.2196	5	20	49.003	0	24.261	10
LOC_Os04g40310.2	Q33E21	dehydrogenase	24.2285	24.4557	24.3433	NaN	NaN	NaN	24.2285	24.4557	24.3433	23.1969	24.4578	23.667	1	9.9	36.121	0	3.4295	4
LOC_Os04g40400.1	B7FAA5	eukaryotic translation initiation factor 4B	26.5039	26.6185	26.6235	NaN	NaN	NaN	26.5039	26.6185	26.6235	24.1913	23.2926	23.6856	4	11.8	57.483	0	35.533	8
LOC_Os04g40530.1	Q7XUQ3	methyltransferase domain containing protein	24.6359	24.1767	24.4023	NaN	NaN	NaN	24.6359	24.1767	24.4023	25.1453	22.787	24.1299	3	8.2	29.932	0	5.2768	8
LOC_Os04g40660.3	Q0JCA4	MA3 domain containing protein	26.6384	26.9599	26.6814	27.1034	27.148	27.5483	26.6384	26.9599	26.6814	27.1034	27.148	27.5483	6	13.8	72.98	0	15.068	18
LOC_Os04g40730.1	Q7XQF8	oxidoreductase	27.9483	28.1605	28.0398	27.7686	27.5547	27.5511	27.9483	28.1605	28.0398	27.7686	27.5547	27.5511	8	34.3	34.708	0	63.687	20
LOC_Os04g40850.1	Q8W425	26S proteasome non-ATPase regulatory subunit 6	26.5325	26.6909	26.7735	26.239	26.0478	26.2801	26.5325	26.6909	26.7735	26.239	26.0478	26.2801	4	11.3	44.084	0	8.3163	9
LOC_Os04g40874.1	A0A0N7KJ94	glucose-6-phosphate 1-dehydrogenase	24.8076	NaN	24.8908	24.7321	25.1399	25.0291	24.8076	23.9713	24.8908	24.7321	25.1399	25.0291	3	17	31.551	0	6.3084	7
LOC_Os04g40950.1	Q7FAH2	glyceraldehyde-3-phosphate dehydrogenase	30.5158	30.1946	30.5093	30.7082	30.8113	30.7781	30.5158	30.1946	30.5093	30.7082	30.8113	30.7781	4	45.7	36.773	0	120.1	66
LOC_Os04g40990.1	Q7XUG1	malate synthase	NaN	NaN	NaN	29.6604	29.6575	29.6186	23.1069	23.1518	24.4682	29.6604	29.6575	29.6186	12	31.2	62.638	0	105.17	28
LOC_Os04g41030.1	Q7XUF9	inactive receptor kinase At1g27190 precursor	27.388	27.7791	27.3458	28.453	28.3642	28.4473	27.388	27.7791	27.3458	28.453	28.3642	28.4473	8	19.9	66.367	0	29.308	28
LOC_Os04g41260.1	Q7X7T4	amine oxidase	27.4507	27.1731	27.3745	26.6729	26.5942	26.5337	27.4507	27.1731	27.3745	26.6729	26.5942	26.5337	9	22	61.815	0	29.511	26
LOC_Os04g41340.1	Q7X7H3	4-nitrophenylphosphatase	NaN	27.015	26.9028	26.5398	26.7036	26.8827	22.7941	27.015	26.9028	26.5398	26.7036	26.8827	4	18.1	39.494	0	12.942	12
LOC_Os04g41800.1	Q0JC31	expressed protein	25.6623	25.8471	25.5475	26.3438	26.328	26.4811	25.6623	25.8471	25.5475	26.3438	26.328	26.4811	2	17.3	16.422	0	23.228	10
LOC_Os04g41950.1	Q7XUK2	calcium-binding mitochondrial anon-60Da	NaN	NaN	NaN	25.3812	25.2982	25.6376	24.4069	24.6114	23.9069	25.3812	25.2982	25.6376	3	6.9	85.279	0	4.5902	5
LOC_Os04g42140.1	Q84PB3	eukaryotic initiation factor iso-4F subunit p82-34	28.4266	28.7517	28.5912	28.1982	28.2032	28.2266	28.4266	28.7517	28.5912	28.1982	28.2032	28.2266	13	20.3	87.021	0	52.609	43
LOC_Os04g42320.1	Q0JBZ3	AT hook motif family protein	26.3239	26.1207	26.6606	26.6012	26.6665	NaN	26.3239	26.1207	26.6606	26.6012	26.6665	24.9179	5	7.8	92.506	0	23.588	8
LOC_Os04g42370.1	Q0JBY9	expressed protein	24.9617	24.8513	24.3802	25.3036	25.2363	25.3638	24.9617	24.8513	24.3802	25.3036	25.2363	25.3638	3	3.4	129.37	0	7.5246	12
LOC_Os04g42580.1	Q7F8Y3	carboxyvinyl-carboxyphosphonate phosphorylmutase	28.0777	28.0427	28.0531	28.1253	28.5097	28.18	28.0777	28.0427	28.0531	28.1253	28.5097	28.18	9	26.2	53.445	0	51.535	37
LOC_Os04g42620.1	Q7F8X9	uncharacterized At4g06744 precursor	26.4956	26.6392	26.5526	NaN	NaN	NaN	26.4956	26.6392	26.5526	24.5297	23.4998	23.71	3	12.8	48.704	0	15.955	5
LOC_Os04g42800.3	Q7X6M7	photosystem-II repair protein	27.0379	27.703	27.7955	26.38	26.3209	26.407	27.0379	27.703	27.7955	26.38	26.3209	26.407	4	30.5	28.307	0	39.976	12
LOC_Os04g42840.1	Q7X8C3	HEAT repeat family protein	24.3901	24.3886	24.267	NaN	NaN	NaN	24.3901	24.3886	24.267	24.5013	23.7052	25.2419	3	2.8	159.92	0	8.6704	8
LOC_Os04g42930.1	P55142	OsGrx_C2.2 - glutaredoxin subgroup I	26.5069	26.7571	26.7077	27.4601	27.4988	27.4089	26.5069	26.7571	26.7077	27.4601	27.4988	27.4089	4	49.6	13.281	0	33.108	21
LOC_Os04g43200.1	Q7FAX1	caleosin related protein	26.4745	25.8409	NaN	29.9413	29.9297	30.0308	26.4745	25.8409	23.6769	29.9413	29.9297	30.0308	6	31.1	27.414	0	35.252	28
LOC_Os04g43350.1	B9FG47	expressed protein	24.8928	25.0439	24.9815	24.6141	24.656	24.7332	24.8928	25.0439	24.9815	24.6141	24.656	24.7332	2	13.2	17.611	0	6.7815	7
LOC_Os04g43690.1	Q0JBQ4	DUF647 domain containing protein	25.499	25.4862	25.5945	25.3439	25.1695	25.254	25.499	25.4862	25.5945	25.3439	25.1695	25.254	5	15.3	47.816	0	22.813	9
LOC_Os04g43916.2	Q7X7Q3	expressed protein;LOC_Os04g43916.1 LOC_Os04g43916.1	24.8888	24.8716	24.9159	25.4743	25.879	25.61	24.8888	24.8716	24.9159	25.4743	25.879	25.61	4	6.7	99.576	0	7.5315	10
LOC_Os04g44110.1	Q7XUA8	hydrolase	23.6949	23.5572	23.6545	25.9193	25.8719	25.9365	23.6949	23.5572	23.6545	25.9193	25.8719	25.9365	2	9.6	46.42	0	7.6852	8
LOC_Os04g44200.1	Q7XKG5	oxygen-evolving enhancer 3	26.9816	27.0207	27.003	27.8365	27.7263	27.4676	26.9816	27.0207	27.003	27.8365	27.7263	27.4676	4	28.1	20.291	0	30.983	14
LOC_Os04g44430.1	B9FG86	transporter	26.3638	26.1385	26.1944	27.3053	27.1635	27.505	26.3638	26.1385	26.1944	27.3053	27.1635	27.505	3	9.9	59.886	0	91.787	13
LOC_Os04g44530.8	Q7XKI9	expressed protein;LOC_Os04g44530.7 LOC_Os04g44530.7	NaN	NaN	24.4191	26.4319	26.3836	26.2334	21.9415	22.6533	24.4191	26.4319	26.3836	26.2334	3	9.2	40.909	0	11.007	6
LOC_Os04g44560.1	Q7XKI6	expressed protein	29.6403	29.7284	29.6038	29.2332	29.1387	29.128	29.6403	29.7284	29.6038	29.2332	29.1387	29.128	14	44.1	37.508	0	139.69	60
LOC_Os04g44610.1	Q0JBJ8	white-brown complex homolog 11	25.3813	24.9662	25.0847	NaN	NaN	NaN	25.3813	24.9662	25.0847	24.4026	23.5805	23.1714	5	12.4	78.421	0	53.174	13
LOC_Os04g44830.1	Q7X8R5	thioredoxin	24.3901	24.4983	24.3539	24.1388	NaN	NaN	24.3901	24.4983	24.3539	24.1388	23.7742	24.6407	2	23.9	19.147	0	3.3718	3
LOC_Os04g45040.3	Q7XMK8	DEAD-box ATP-dependent RNA helicase	25.3635	25.4735	25.5004	25.8871	25.9445	25.633	25.3635	25.4735	25.5004	25.8871	25.9445	25.633	2	15.7	56.71	0	5.9099	5
LOC_Os04g45070.1	Q7XMK5	remorin	32.1453	32.2396	32.2383	33.1069	33.1901	33.1919	32.1453	32.2396	32.2383	33.1069	33.1901	33.1919	11	55.3	22.415	0	279.98	94
LOC_Os04g45190.1	Q0JBF7	MSP domain containing protein	NaN	NaN	NaN	24.6076	24.9111	25.0064	23.2711	23.792	24.0087	24.6076	24.9111	25.0064	2	8	27.693	0	9.1623	7
LOC_Os04g45210.1	Q7XU74	peroxisomal biogenesis factor 11	28.1571	27.987	27.5644	27.7413	27.246	27.2966	28.1571	27.987	27.5644	27.7413	27.246	27.2966	5	27	24.71	0	26.14	22
LOC_Os04g45290.1	Q0JBF1	glycosyl hydrolases	NaN	NaN	NaN	24.8893	24.7828	24.9693	24.409	23.179	23.5721	24.8893	24.7828	24.9693	2	5.5	71.756	0	3.0833	3
LOC_Os04g45490.1	B9FGD1	elongation factor	30.2471	30.2413	30.3223	30.0309	30.1513	30.0246	30.2471	30.2413	30.3223	30.0309	30.1513	30.0246	20	48.8	67.527	0	126.88	89
LOC_Os04g45600.1	Q7FB12	NDH-M H PLASTOQUINONE DEHY	31.3552	31.3695	31.2441	29.2858	29.4453	29.6636	31.3552	31.3695	31.2441	29.2858	29.4453	29.6636	14	75	25.665	0	167.24	81
LOC_Os04g45970.1	Q7XN06	glutamate dehydrogenase protein	NaN	NaN	24.44	26.0022	26.1907	26.1524	22.7611	23.816	24.44	26.0022	26.1907	26.1524	2	8	44.622	0	15.703	7
LOC_Os04g46010.1	Q7XN02	PPR repeat domain containing protein	25.6438	25.6668	25.3984	25.306	25.5314	25.7429	25.6438	25.6668	25.3984	25.306	25.5314	25.7429	5	13.5	58.009	0	12.081	10
LOC_Os04g46460.2	Q7XU28	amino acid kinase	26.9954	26.6585	26.8942	27.0669	26.9976	26.8616	26.9954	26.6585	26.8942	27.0669	26.9976	26.8616	5	20.1	35.173	0	22.843	13
LOC_Os04g46560.1	Q7FAT9	lactate/malate dehydrogenase	24.6736	24.7315	24.5246	24.5436	24.7511	24.7513	24.6736	24.7315	24.5246	24.5436	24.7511	24.7513	2	5.7	38.297	0	7.0893	6
LOC_Os04g46610.2	Q7FAT7	PAP fibrillin family domain containing protein	26.5341	27.3883	27.4181	25.2361	25.254	25.3335	26.5341	27.3883	27.4181	25.2361	25.254	25.3335	3	24	24.345	0	10.971	6
LOC_Os04g46620.1	Q7FAT6	T-complex protein	27.7961	27.7677	27.7283	28.325	28.3592	28.5212	27.7961	27.7677	27.7283	28.325	28.3592	28.5212	8	20.4	59.232	0	75.436	33
LOC_Os04g46890.3	B9FGI4	pre-mRNA-processing factor 31	25.1543	24.9314	25.2439	25.4037	25.5381	25.6971	25.1543	24.9314	25.2439	25.4037	25.5381	25.6971	3	9.3	51.642	0	15.803	13
LOC_Os04g46960.2	Q0JB49	glutathione peroxidase domain containing protein	26.7015	26.8249	26.7447	NaN	NaN	NaN	26.7015	26.8249	26.7447	24.3705	23.931	24.3789	3	20.8	18.483	0	9.7658	6
LOC_Os04g47220.1	Q7XSQ9	aquaporin protein	31.7525	31.7437	31.7935	32.5727	32.5013	32.5687	31.7525	31.7437	31.7935	32.5727	32.5013	32.5687	2	10.3	29.9	0	44.554	39
LOC_Os04g47770.1	Q7XQJ5	cis-zeatin O-glucosyltransferase	NaN	NaN	NaN	26.2879	26.5186	26.5039	23.1943	22.7906	22.8844	26.2879	26.5186	26.5039	6	20.3	50.564	0	16.241	13
LOC_Os04g49510.2	Q9FXQ3	CAMK_CAMK_like.27 - CAMK includes calcium/calmodulin depedent kinases	26.75	26.9175	26.832	27.0948	27.1339	27.2179	26.75	26.9175	26.832	27.0948	27.1339	27.2179	2	13.7	48.334	0	27.998	14
LOC_Os04g50860.1	Q0JAJ2	expressed protein	27.4185	27.2427	27.3114	28.0656	28.2505	28.2526	27.4185	27.2427	27.3114	28.0656	28.2505	28.2526	5	21	45.306	0	38.292	25
LOC_Os04g50890.1	Q0JAI9	secretory carrier-associated membrane protein	25.4986	25.5659	26.1402	NaN	25.3963	NaN	25.4986	25.5659	26.1402	23.841	25.3963	23.648	2	9.9	30.501	0	5.7047	4
LOC_Os04g51080.1	Q7X7A8	scramblase	26.5116	26.4553	26.4414	26.0904	26.5878	26.0801	26.5116	26.4553	26.4414	26.0904	26.5878	26.0801	3	12.2	38.27	0	11.823	12
LOC_Os04g51150.1	O82807	transposon protein	NaN	NaN	NaN	26.6409	26.5246	26.7483	23.2362	24.9857	24.0218	26.6409	26.5246	26.7483	2	7.5	37.136	0	6.8694	9
LOC_Os04g51270.2	Q7FAM9	vacuolar ATPase G subunit	28.2307	27.7655	28.1832	31.0351	31.006	31.0839	28.2307	27.7655	28.1832	31.0351	31.006	31.0839	3	35.5	12.275	0	178.7	39
LOC_Os04g51300.1	Q0JAF4	peroxidase precursor	31.6279	31.4897	31.5104	29.965	30.093	30.1074	31.6279	31.4897	31.5104	29.965	30.093	30.1074	11	40.5	38.181	0	127.87	84
LOC_Os04g51330.1	Q0JAF1	maltose excess 1-like	NaN	26.0853	25.9943	24.7407	24.9237	24.9054	23.4535	26.0853	25.9943	24.7407	24.9237	24.9054	2	2.8	43.426	0	5.54	7
LOC_Os04g51610.3	Q7X8B5	calcium-transporting ATPase	28.1689	27.8551	27.9459	28.2667	28.3789	28.018	28.1689	27.8551	27.9459	28.2667	28.3789	28.018	9	12.5	113.1	0	74.285	27
LOC_Os04g51630.2	Q0JAC6	60S ribosomal L7	27.8879	27.9322	27.9848	27.9456	28.5557	28.231	27.8879	27.9322	27.9848	27.9456	28.5557	28.231	3	28.7	28.361	0	17.633	14
LOC_Os04g51792.1	Q7XS47	PAP fibrillin family domain containing protein	28.9524	28.1944	26.1523	27.0718	26.9292	27.2236	28.9524	28.1944	26.1523	27.0718	26.9292	27.2236	5	27.9	23.742	0	68.97	19
LOC_Os04g52100.1	Q0JA93	peptidase	NaN	NaN	NaN	25.3563	25.0559	25.2138	23.3838	23.7205	22.1053	25.3563	25.0559	25.2138	2	11.5	37.134	0	5.4164	7
LOC_Os04g52130.1	Q7XPL2	coproporphyrinogen III oxidase	26.9444	27.0236	27.0887	26.4643	26.4366	26.6259	26.9444	27.0236	27.0887	26.4643	26.4366	26.6259	3	10.8	43.871	0	40.24	10
LOC_Os04g52164.1	Q7XPL0	transferase family protein	26.5578	26.4318	26.9668	NaN	25.8429	NaN	26.5578	26.4318	26.9668	24.0961	25.8429	25.3981	4	12.8	46.641	0	11.443	9
LOC_Os04g52361.1	Q7XIK5	ribosomal S17	25.4435	25.5517	25.5257	25.8783	26.3127	25.9431	25.4435	25.5517	25.5257	25.8783	26.3127	25.9431	2	10.6	17.836	0.00030395	2.9474	5
LOC_Os04g52450.2	Q7XN11	aminotransferase	25.0149	NaN	NaN	27.148	27.1904	26.9184	25.0149	22.41	24.2031	27.148	27.1904	26.9184	2	12.4	47.057	0	21.931	11
LOC_Os04g52460.1	Q7XN10	retrotransposon protein	NaN	NaN	NaN	25.323	25.6762	25.7262	23.5533	22.7596	22.558	25.323	25.6762	25.7262	3	2.8	205.02	0	4.1856	6
LOC_Os04g52600.1	Q7XTP6	SHR5-receptor-like kinase	27.4277	27.4077	27.3528	28.9753	29.0005	28.9861	27.4277	27.4077	27.3528	28.9753	29.0005	28.9861	7	14.6	111.6	0	56.655	32
LOC_Os04g52760.1	Q7X6D9	gamma-soluble NSF attachment protein	26.1082	26.0745	26.0119	26.8837	27.0177	26.7913	26.1082	26.0745	26.0119	26.8837	27.0177	26.7913	3	15.3	24.574	0	6.9759	10
LOC_Os04g52840.1	Q7XTU1	tyrosine kinase domain containing protein	25.3624	NaN	25.4239	27.5529	27.47	27.4824	25.3624	24.6575	25.4239	27.5529	27.47	27.4824	2	14.2	41.659	0	11.523	15
LOC_Os04g52900.1	Q7XTT6	ABC transporter family protein	30.2359	30.2399	30.3419	30.6424	30.7541	30.6803	30.2359	30.2399	30.3419	30.6424	30.7541	30.6803	32	28.7	183.15	0	263.66	142
LOC_Os04g52960.1	Q7XTT4	nucleolin	26.6317	26.649	26.7601	24.9573	24.8943	24.9017	26.6317	26.649	26.7601	24.9573	24.8943	24.9017	4	8.1	75.253	0	16.718	12
LOC_Os04g53230.1	Q7XPR2	aminomethyltransferase	28.506	28.4183	28.3181	29.4683	29.7597	29.5908	28.506	28.4183	28.3181	29.4683	29.7597	29.5908	7	25.7	43.968	0	80.033	43
LOC_Os04g53310.1	Q0J9Z0	soluble starch synthase 3	29.1352	29.1455	29.2301	28.9125	28.8872	29.0005	29.1352	29.1455	29.2301	28.9125	28.8872	29.0005	13	14.3	138.2	0	105.37	59
LOC_Os04g53440.2	Q0J9Y2	RNA recognition motif containing protein	26.0227	25.3189	25.7018	25.7601	25.931	25.8213	26.0227	25.3189	25.7018	25.7601	25.931	25.8213	2	10.8	46.195	0	6.463	11
LOC_Os04g53490.1	Q0J9X8	OsCHL Chloroplastic lipocalin	30.07	30.0478	29.9717	28.2985	28.4743	28.5481	30.07	30.0478	29.9717	28.2985	28.4743	28.5481	11	32.2	37.446	0	47.344	39
LOC_Os04g54410.1	Q7XND3	expressed protein	28.3826	28.2923	28.4635	29.042	29.0105	28.9424	28.3826	28.2923	28.4635	29.042	29.0105	28.9424	8	24.2	67.722	0	69.169	29
LOC_Os04g54640.2	Q7XPH4	peptidase	29.5356	29.507	29.3196	28.5639	28.6135	28.4847	29.5356	29.507	29.3196	28.5639	28.6135	28.4847	8	26.3	33.507	0	82.831	38
LOC_Os04g54790.1	Q7XQV1	ELMO/CED-12 family protein	28.5485	28.0437	27.9721	24.7731	NaN	24.7485	28.5485	28.0437	27.9721	24.7731	23.2481	24.7485	10	20	80.602	0	43.051	19
LOC_Os04g54810.1	Q7X6F6	beta-D-xylosidase	25.7055	25.6079	25.6949	24.7573	24.6945	24.9133	25.7055	25.6079	25.6949	24.7573	24.6945	24.9133	3	6.4	80.92	0	10.201	11
LOC_Os04g55040.2	Q7XJX6	vacuolar ATP synthase subunit D 1	28.6701	28.8101	28.5885	30.0406	30.1648	30.1592	28.6701	28.8101	28.5885	30.0406	30.1648	30.1592	8	36.8	29.18	0	188.95	48
LOC_Os04g55050.2	A0A0N7KJT1	amidase	26.0752	25.7385	26.2494	26.376	26.2555	26.4754	26.0752	25.7385	26.2494	26.376	26.2555	26.4754	5	19.1	45.871	0	17.722	14
LOC_Os04g55180.2	Q7XTM8	hydrolase	29.5277	29.6543	29.7926	29.2338	29.3066	28.9367	29.5277	29.6543	29.7926	29.2338	29.3066	28.9367	9	40.1	42.607	0	153.93	40
LOC_Os04g55230.1	Q7XQE6	tetratricopeptide repeat domain containing protein	26.1727	25.6779	25.641	NaN	NaN	NaN	26.1727	25.6779	25.641	23.1762	22.7331	24.995	3	4.4	189.29	0	15.991	4
LOC_Os04g55520.1	Q7XTV6	AP2 domain containing protein	NaN	NaN	NaN	24.7258	24.6317	24.4738	23.1388	23.706	23.2139	24.7258	24.6317	24.4738	3	21.9	25.434	0	5.3087	5
LOC_Os04g55650.2	B7EK56	oryzain alpha chain precursor	28.3412	28.3709	28.4192	30.4464	30.6586	30.4103	28.3412	28.3709	28.4192	30.4464	30.6586	30.4103	4	24.5	25.964	0	47.29	28
LOC_Os04g55690.1	Q7XMP9	CCB4	25.2618	25.3471	25.4248	24.7262	24.295	24.5414	25.2618	25.3471	25.4248	24.7262	24.295	24.5414	3	16	31.39	0	13.102	14
LOC_Os04g55720.1	Q7XMP6	D-3-phosphoglycerate dehydrogenase	26.3831	27.1111	27.1646	NaN	NaN	24.8271	26.3831	27.1111	27.1646	23.3215	22.8537	24.8271	3	10.8	63.964	0	13.563	6
LOC_Os04g55960.1	Q7X7K8	NADPH reductase	27.0226	27.0013	27.0483	27.7554	27.6794	27.6087	27.0226	27.0013	27.0483	27.7554	27.6794	27.6087	8	25.6	76.171	0	90.979	30
LOC_Os04g56160.1	Q7XPY2	plasma membrane ATPase	33.6085	33.6607	33.6284	33.8322	33.7511	33.836	33.6085	33.6607	33.6284	33.8322	33.7511	33.836	22	44.2	104.82	0	323.31	286
LOC_Os04g56230.1	Q7FAL6	polyprenyl synthetase	25.7555	25.77	25.8328	NaN	23.1291	23.8877	25.7555	25.77	25.8328	24.5095	23.1291	23.8877	4	12.3	46.382	0	18.179	11
LOC_Os04g56240.1	Q7FAL5	lipase	27.0285	27.283	27.1284	26.3348	26.249	26.3546	27.0285	27.283	27.1284	26.3348	26.249	26.3546	6	17.1	51.803	0	17.167	11
LOC_Os04g56320.1	Q7XN85	AAA-type ATPase family protein	28.2492	28.2238	28.2497	27.9652	27.982	27.91	28.2492	28.2238	28.2497	27.9652	27.982	27.91	8	32.2	49.087	0	37.598	32
LOC_Os04g56400.1	P14655	glutamine synthetase	31.9507	31.9933	31.922	31.6598	31.8622	31.9645	31.9507	31.9933	31.922	31.6598	31.8622	31.9645	12	43.7	46.642	0	232.92	108
LOC_Os04g56430.1	Q8S3P3	cysteine-rich receptor-like kinase	24.6968	24.257	24.3024	29.1162	29.0969	29.1061	24.6968	24.257	24.3024	29.1162	29.0969	29.1061	5	26.4	27.306	0	52.117	19
LOC_Os04g56970.2	B7EYF6	tubulin/FtsZ domain containing protein	25.0081	24.7098	24.4894	NaN	NaN	NaN	25.0081	24.7098	24.4894	23.8197	23.1559	25.8283	3	9.7	41.793	0	6.121	4
LOC_Os04g57020.2	Q84P62	expressed protein;LOC_Os04g57020.1 LOC_Os04g57020.1	28.5751	28.4573	28.4999	28.1689	28.0265	28.4888	28.5751	28.4573	28.4999	28.1689	28.0265	28.4888	10	45.2	32.758	0	63.894	42
LOC_Os04g57440.1	A0A0P0WGF4	oryzain beta chain precursor	26.6486	26.5196	26.6518	27.3048	27.5728	27.6617	26.6486	26.5196	26.6518	27.3048	27.5728	27.6617	3	7.9	49.798	0	9.0364	10
LOC_Os04g57540.1	Q7XR47	adenylate kinase	NaN	NaN	NaN	25.546	25.2436	25.5505	22.3054	22.7626	23.1561	25.546	25.2436	25.5505	2	8.4	31.062	0	4.7598	4
LOC_Os04g57810.3	Q7XQ97	GA18008-PA	25.0225	24.2777	25.2839	26.2073	26.1346	26.2344	25.0225	24.2777	25.2839	26.2073	26.1346	26.2344	2	17.2	19.437	0	13.339	7
LOC_Os04g57850.1	Q7XQ93	AMP-binding enzyme	NaN	NaN	NaN	25.7196	25.699	25.7112	22.421	22.5786	23.3017	25.7196	25.699	25.7112	4	10	60.422	0	16.969	6
LOC_Os04g57890.1	Q7XQ88	oligosaccharyl transferase	26.172	26.4218	26.2883	27.4205	27.3644	27.253	26.172	26.4218	26.2883	27.4205	27.3644	27.253	3	5.1	80.731	0	51.892	11
LOC_Os04g57950.1	Q7XKC8	dihydroorotate dihydrogenase protein	27.217	27.4839	27.5305	27.0978	27.1245	26.9912	27.217	27.4839	27.5305	27.0978	27.1245	26.9912	9	28.4	49.533	0	25.273	19
LOC_Os04g58110.1	Q7XKB5	pyruvate kinase	27.6499	27.4012	27.3666	28.3126	28.2741	28.3988	27.6499	27.4012	27.3666	28.3126	28.2741	28.3988	7	22.3	55.226	0	39.694	28
LOC_Os04g58160.2	Q7XKA9	fiber Fb34	26.1637	26.1258	26.0876	26.6262	26.1788	26.3908	26.1637	26.1258	26.0876	26.6262	26.1788	26.3908	2	15.3	19.597	0	8.193	8
LOC_Os04g58200.2	Q7XKF3	protochlorophyllide reductase A	29.4419	29.4589	29.2165	29.903	30.089	30.0513	29.4419	29.4589	29.2165	29.903	30.089	30.0513	15	48.5	40.414	0	65.231	67
LOC_Os04g58240.1	Q7XKE9	expressed protein	28.0325	27.8566	28.2846	27.9023	28.1539	28.2537	28.0325	27.8566	28.2846	27.9023	28.1539	28.2537	3	13.6	32.536	0	19.551	15
LOC_Os04g58620.1	Q7XPW1	potasium efflux antiporter protein	30.2969	30.4761	30.563	30.1589	30.1539	30.1247	30.2969	30.4761	30.563	30.1589	30.1539	30.1247	20	23.7	123.82	0	169.78	71
LOC_Os04g58640.1	Q0J8X2	cleavage and polyadenylation specificity factor subunit 5	27.0124	27.0807	27.1173	27.1916	26.854	27.2083	27.0124	27.0807	27.1173	27.1916	26.854	27.2083	3	24.8	23.174	0	20.275	14
LOC_Os04g58710.1	Q7XPV4	AMP-binding domain containing protein	27.8529	27.8412	27.8924	26.5353	26.6923	26.6561	27.8529	27.8412	27.8924	26.5353	26.6923	26.6561	8	27.4	54.474	0	55.419	20
LOC_Os04g58750.4	B9FDE0	kinase family protein	27.2522	27.3994	27.4438	28.3744	28.6859	28.714	27.2522	27.3994	27.4438	28.3744	28.6859	28.714	5	20.4	40.252	0	32.77	17
LOC_Os04g58780.1	Q0J8W3	pentatricopeptide repeat protein	24.7034	24.4674	NaN	24.434	24.6176	24.5078	24.7034	24.4674	23.9983	24.434	24.6176	24.5078	2	2.2	101.13	0	4.5389	5
LOC_Os04g58850.1	Q7XPU1	harpin-induced 1 domain containing protein	29.0283	29.048	29.1335	30.0677	30.0665	29.9606	29.0283	29.048	29.1335	30.0677	30.0665	29.9606	4	34.1	22.207	0	58.782	23
LOC_Os04g58880.1	Q7XPT8	exo70 exocyst complex subunit	25.713	25.6166	25.609	26.0792	25.9717	26.0006	25.713	25.6166	25.609	26.0792	25.9717	26.0006	6	13.1	71.549	0	13.978	13
LOC_Os04g59150.1	Q7XSV2	peroxidase precursor	26.7214	26.1099	26.1821	26.8186	26.354	26.4325	26.7214	26.1099	26.1821	26.8186	26.354	26.4325	5	19.4	36.988	0	47.035	13
LOC_Os04g59190.1	Q7XSU8	peroxidase precursor	27.1281	27.3338	27.0166	28.0282	28.1748	28.2179	27.1281	27.3338	27.0166	28.0282	28.1748	28.2179	3	22.9	35.227	0	36.751	20
LOC_Os04g59200.1	Q7XSU7	peroxidase precursor	26.681	26.8141	26.7068	27.5899	27.5323	27.4505	26.681	26.8141	26.7068	27.5899	27.5323	27.4505	3	13.4	37.264	0	23.487	18
LOC_Os04g59440.1	Q0J8R9	chlorophyll A-B binding protein	28.3013	28.3822	28.4281	25.1561	25.5296	25.2563	28.3013	28.3822	28.4281	25.1561	25.5296	25.2563	4	30.7	26.95	0	75.956	14
LOC_Os04g59494.1	B9FDR3	transportin-2	27.2264	27.154	27.3381	27.9851	27.6859	27.8025	27.2264	27.154	27.3381	27.9851	27.6859	27.8025	3	8.4	119.21	0	61.943	24
LOC_Os04g59520.1	Q7XKA3	anthranilate phosphoribosyltransferase	27.1082	26.751	26.4923	27.3109	27.338	27.4451	27.1082	26.751	26.4923	27.3109	27.338	27.4451	5	8	113.28	0	12.989	14
LOC_Os05g01090.3	Q9FW35	pex14	26.3063	26.3038	26.3595	26.7909	26.6285	26.4614	26.3063	26.3038	26.3595	26.7909	26.6285	26.4614	4	17.8	53.707	0	17.443	11
LOC_Os05g01110.1	Q9FW34	ribosomal L28 protein	27.138	26.8542	26.8271	NaN	NaN	NaN	27.138	26.8542	26.8271	24.4631	23.4025	24.3528	2	12.4	14.928	0	3.4808	5
LOC_Os05g01262.2	B7EUG6	translocon-associated beta domain containing protein	27.6202	27.5611	27.5222	27.5729	27.4847	27.6258	27.6202	27.5611	27.5222	27.5729	27.4847	27.6258	2	13.9	21.026	0	14.343	12
LOC_Os05g01270.1	Q75M32	peptidyl-prolyl cis-trans isomerase	30.6087	30.6716	30.6266	29.6691	29.6042	29.587	30.6087	30.6716	30.6266	29.6691	29.6042	29.587	7	34.4	26.59	0	130.65	38
LOC_Os05g01300.1	Q0DLG4	expressed protein	NaN	NaN	NaN	24.6763	24.6257	24.4452	22.9008	24.3864	23.2175	24.6763	24.6257	24.4452	2	25.6	20.565	0	4.1544	5
LOC_Os05g01450.1	Q75M19	eukaryotic translation initiation factor 3 subunit F	28.1594	28.0835	28.4215	29.2759	29.0359	29.0911	28.1594	28.0835	28.4215	29.2759	29.0359	29.0911	7	36.3	31.238	0	84.539	27
LOC_Os05g01470.1	Q75M18	methionine S-methyltransferase	24.3617	24.3322	24.0309	NaN	NaN	NaN	24.3617	24.3322	24.0309	23.7887	23.181	22.7813	4	5	120.88	0	8.6028	7
LOC_Os05g01820.1	I3QD60	cytochrome b5-like Heme/Steroid binding domain containing protein	30.3179	30.1496	30.2846	30.9484	31.0873	30.8165	30.3179	30.1496	30.2846	30.9484	31.0873	30.8165	4	45.3	15.282	0	118.28	66
LOC_Os05g01970.5	Q65XW4	NAD dependent epimerase/dehydratase family protein	25.9469	25.8892	25.5128	25.1207	25.1883	25.0083	25.9469	25.8892	25.5128	25.1207	25.1883	25.0083	3	14	31.274	0	7.2145	8
LOC_Os05g02060.1	Q65XV6	mitochondrial import inner membrane translocase subunit Tim17	26.2679	26.7575	26.3747	25.6588	NaN	NaN	26.2679	26.7575	26.3747	25.6588	23.4005	24.2831	2	24	15.616	0	14.746	13
LOC_Os05g02300.1	Q75L11	Core histone H2A/H2B/H3/H4 domain containing protein	31.1556	31.2692	31.1386	NaN	NaN	NaN	31.1556	31.2692	31.1386	23.2637	23.2699	24.723	2	15.4	16.5	0	14.011	11
LOC_Os05g02520.2	Q65XA1	cupin domain containing protein	NaN	NaN	NaN	25.1581	25.0447	25.0687	23.7339	23.1597	22.8296	25.1581	25.0447	25.0687	2	6.9	35.138	0	3.6292	3
LOC_Os05g02530.1	Q65XA0	glutathione S-transferase	27.2044	27.35	27.2959	26.5232	27.0491	26.979	27.2044	27.35	27.2959	26.5232	27.0491	26.979	6	29	32.598	0	14.45	15
LOC_Os05g02650.1	B9FM64	expressed protein	24.6475	24.6752	24.8187	25.8182	25.7628	25.2968	24.6475	24.6752	24.8187	25.8182	25.7628	25.2968	5	8.6	90.79	0	11.04	10
LOC_Os05g02890.1	B9FGJ2	white-brown complex homolog 16	NaN	NaN	23.4847	25.3871	24.8781	24.8272	24.3061	23.5925	23.4847	25.3871	24.8781	24.8272	2	3.1	75.852	0	5.4787	4
LOC_Os05g03000.2	Q60F47	inner membrane alx	26.3503	25.8175	25.8435	25.0236	NaN	NaN	26.3503	25.8175	25.8435	25.0236	23.6415	23.5729	2	9.4	41.295	0	27.719	8
LOC_Os05g03140.1	Q75L87	tetraspanin family protein	27.1951	27.0435	27.0825	26.7231	27.1742	27.9515	27.1951	27.0435	27.0825	26.7231	27.1742	27.9515	4	15	32.882	0	44.64	22
LOC_Os05g03610.1	Q75IL8	phospholipase C	24.3397	24.6338	24.1651	25.8202	25.4595	26.2186	24.3397	24.6338	24.1651	25.8202	25.4595	26.2186	4	8.4	67.052	0	11.197	8
LOC_Os05g03820.3	B9FM97	glutamate--cysteine ligase	24.5893	24.5851	24.9021	24.7615	25.0408	NaN	24.5893	24.5851	24.9021	24.7615	25.0408	23.9474	3	6.9	55.722	0	14.18	6
LOC_Os05g03920.1	Q65XU5	TKL_IRAK_DUF26-lf.3 - DUF26 kinases have homology to DUF26 containing loci	NaN	NaN	NaN	25.1	25.4432	25.1205	22.3111	22.7379	23.5954	25.1	25.4432	25.1205	3	5.1	71.796	0	4.4025	5
LOC_Os05g04170.3	Q0DL03	AMP-binding enzyme	26.8924	26.652	25.6899	26.1523	26.3325	26.13	26.8924	26.652	25.6899	26.1523	26.3325	26.13	6	13.9	74.915	0	29.895	14
LOC_Os05g04380.1	Q6AVZ8	peroxidase precursor	29.3084	29.412	29.3441	28.1542	28.108	28.2246	29.3084	29.412	29.3441	28.1542	28.108	28.2246	7	27.5	37.613	0	41.306	24
LOC_Os05g04510.2	B7EKA4	S-adenosylmethionine synthetase	27.0724	27.1851	27.0263	NaN	25.8067	25.7219	27.0724	27.1851	27.0263	24.3199	25.8067	25.7219	2	41.4	43.219	0	9.531	11
LOC_Os05g04520.1	Q75L45	kinase	29.5536	29.6444	29.5708	30.8968	30.9066	30.9285	29.5536	29.6444	29.5708	30.8968	30.9066	30.9285	11	44	39.31	0	173.88	60
LOC_Os05g04630.6	P42211	retrotransposon protein	28.1568	28.2176	28.0393	29.8952	30.0271	30.0767	28.1568	28.2176	28.0393	29.8952	30.0271	30.0767	6	16.9	54.089	0	15.559	24
LOC_Os05g05470.1	Q6ASR1	T-complex protein	28.4394	28.3647	28.3644	29.105	29.0269	29.0067	28.4394	28.3647	28.3644	29.105	29.0269	29.0067	11	28.2	59.233	0	54.226	35
LOC_Os05g05830.1	Q5WN02	bifunctional folD	29.5621	29.61	29.8461	30.7316	30.6051	30.5089	29.5621	29.61	29.8461	30.7316	30.6051	30.5089	11	49	30.733	0	113.53	47
LOC_Os05g05840.1	A0A0P0WI14	tRNA synthetase class II core domain containing protein	28.2857	27.9641	28.3479	28.7508	28.8016	28.9816	28.2857	27.9641	28.3479	28.7508	28.8016	28.9816	16	28.1	94.779	0	97.734	46
LOC_Os05g05940.1	Q9FRA7	stress-related protein	26.5691	26.0408	26.023	28.2541	28.1412	28.209	26.5691	26.0408	26.023	28.2541	28.1412	28.209	7	30.8	26.859	0	29.78	23
LOC_Os05g05950.1	Q0DKN6	TOC159	31.0025	31.004	31.0107	31.3223	31.2369	31.3253	31.0025	31.004	31.0107	31.3223	31.2369	31.3253	26	27.9	139.96	0	294.24	131
LOC_Os05g06310.1	Q5WMY3	60S ribosomal L18-3	29.185	29.517	29.3246	29.4735	29.4072	29.5824	29.185	29.517	29.3246	29.4735	29.4072	29.5824	3	27.1	21.311	0	55.999	22
LOC_Os05g06350.1	Q0DKL7	importin subunit alpha	29.6343	29.707	29.7196	29.8195	29.9964	30.0029	29.6343	29.707	29.7196	29.8195	29.9964	30.0029	12	42.1	58.566	0	157.98	57
LOC_Os05g06430.2	A0A067Y3P4	OsPDIL2-1 disulfide isomerase PDIL2-1	26.599	26.9466	26.7802	28.7262	28.5436	28.6942	26.599	26.9466	26.7802	28.7262	28.5436	28.6942	4	23.8	39.912	0	18.889	17
LOC_Os05g06440.1	B9FHF3	dnaJ homolog subfamily B member 11 precursor	NaN	NaN	NaN	26.2327	26.1905	26.2627	22.3446	23.9215	25.3795	26.2327	26.1905	26.2627	2	8.1	39.276	0	4.3322	5
LOC_Os05g06450.2	O49068	tubulin/FtsZ domain containing protein	24.781	25.1627	25.2279	25.6202	25.6864	NaN	24.781	25.1627	25.2279	25.6202	25.6864	23.9553	3	7.5	52.869	0	9.2655	7
LOC_Os05g06500.1	Q75M01	universal stress domain containing protein	28.2473	28.3361	28.5745	29.3503	28.6483	29.3204	28.2473	28.3361	28.5745	29.3503	28.6483	29.3204	5	37.1	18.004	0	70.365	24
LOC_Os05g06690.3	B9FHN3	HECT-domain domain containing protein	26.4857	27.1134	26.5779	NaN	NaN	NaN	26.4857	27.1134	26.5779	23.6617	22.9825	24.4152	3	4.5	108.85	0	4.6124	5
LOC_Os05g06750.1	B9FML1	dihydrolipoyl dehydrogenase	24.2016	NaN	NaN	24.6702	25.2295	24.7091	24.2016	23.2283	22.9073	24.6702	25.2295	24.7091	2	21.4	52.934	0	5.196	3
LOC_Os05g06920.1	Q6ATB2	relA-SpoT like RSH4	30.6	30.5355	30.3398	28.643	28.6607	28.6629	30.6	30.5355	30.3398	28.643	28.6607	28.6629	17	47.4	60.273	0	171.1	81
LOC_Os05g06980.1	A0A0P0WIK5	expressed protein	24.638	24.7415	24.4024	25.784	24.0731	25.2298	24.638	24.7415	24.4024	25.784	24.0731	25.2298	3	5.6	74.235	0	7.066	7
LOC_Os05g07030.2	Q75IR7	arginyl-tRNA synthetase	27.7145	27.5764	27.6195	27.7848	NaN	27.6308	27.7145	27.5764	27.6195	27.7848	23.5278	27.6308	6	10.1	68.289	0	40.406	13
LOC_Os05g07050.1	Q75IR5	pre-mRNA-processing-splicing factor 8	28.1092	28.122	28.0778	28.0833	28.1622	28.1882	28.1092	28.122	28.0778	28.0833	28.1622	28.1882	20	12.8	274.07	0	79.303	45
LOC_Os05g07090.1	Q75IR2	acyl-coenzyme A dehydrogenase	24.7511	24.5758	24.7521	26.6863	27.4298	27.2885	24.7511	24.5758	24.7521	26.6863	27.4298	27.2885	4	13.5	46.538	0	15.196	10
LOC_Os05g07130.2	Q75IQ9	6PF-2-K/Fru-2	29.6306	29.679	29.6992	29.8719	29.9251	29.9821	29.6306	29.679	29.6992	29.8719	29.9251	29.9821	19	37.8	84.818	0	221.19	89
LOC_Os05g07640.1	Q60DU1	expressed protein	25.1622	24.7943	24.7715	25.515	25.5644	25.665	25.1622	24.7943	24.7715	25.515	25.5644	25.665	3	15.9	25.841	0	7.0513	11
LOC_Os05g08370.1	Q6AT26	CESA1 - cellulose synthase	25.8545	25.4154	25.1531	24.2422	NaN	NaN	25.8545	25.4154	25.1531	24.2422	24.2625	23.0175	3	3.6	121.27	0	4.8355	5
LOC_Os05g08930.1	Q5KQJ2	chloroplast lumen common family protein	27.294	27.6293	27.5336	27.6182	27.602	27.6274	27.294	27.6293	27.5336	27.6182	27.602	27.6274	7	22.2	44.719	0	29.343	24
LOC_Os05g09400.3	Q60EZ7	30S ribosomal S31	27.8009	27.792	27.6579	28.054	27.9599	27.9036	27.8009	27.792	27.6579	28.054	27.9599	27.9036	2	23	13.351	0	4.7382	9
LOC_Os05g09490.2	Q9LST8	peptidase	24.6822	24.6726	24.6479	26.258	26.2226	26.2283	24.6822	24.6726	24.6479	26.258	26.2226	26.2283	2	7.7	28.997	0	7.32	7
LOC_Os05g10210.1	Q60DT7	HAD superfamily phosphatase	25.9169	26.4734	26.2441	NaN	25.58	NaN	25.9169	26.4734	26.2441	23.6914	25.58	24.7198	2	22.3	28.668	0	18.924	11
LOC_Os05g10730.2	Q53WJ5	ABC transporter	25.4855	25.4426	25.5393	27.9276	27.94	27.6955	25.4855	25.4426	25.5393	27.9276	27.94	27.6955	9	8.3	147.23	0	27.143	16
LOC_Os05g11120.1	Q6L4R1	prenylated rab acceptor	25.2769	25.2962	NaN	26.5983	26.4297	26.24	25.2769	25.2962	24.3719	26.5983	26.4297	26.24	1	14.5	20.686	0	10.653	13
LOC_Os05g11780.1	Q60EY9	mitochondrial carrier protein	30.5771	30.6562	30.5906	30.8817	30.9461	31.0531	30.5771	30.6562	30.5906	30.8817	30.9461	31.0531	6	38.2	32.802	0	138.92	60
LOC_Os05g12680.1	A0A0N7KKC7	retrotransposon protein	27.679	27.5866	27.5357	27.4569	27.606	27.5849	27.679	27.5866	27.5357	27.4569	27.606	27.5849	5	15.1	70.739	0	33.592	26
LOC_Os05g13520.1	Q75HT8	white-brown complex homolog 12	24.525	24.7639	24.5593	24.9121	24.7405	24.7876	24.525	24.7639	24.5593	24.9121	24.7405	24.7876	2	3.1	77.378	0	4.2921	7
LOC_Os05g13950.1	Q0DJU1	eukaryotic translation initiation factor 3 subunit E-interacting protein	27.2332	27.2378	27.2248	27.7332	27.8537	27.9663	27.2332	27.2378	27.2248	27.7332	27.8537	27.9663	10	26.1	61.328	0	30.826	35
LOC_Os05g14170.1	Q75GB3	expressed protein	29.6757	29.8122	29.569	30.0858	30.2662	30.2024	29.6757	29.8122	29.569	30.0858	30.2662	30.2024	19	24.8	109.84	0	111.09	93
LOC_Os05g14550.1	A0A077KAU4	Phosphatidylinositol kinase and FAT containing domain protein	24.4301	24.3782	23.9501	25.2355	25.1421	25.2763	24.4301	24.3782	23.9501	25.2355	25.1421	25.2763	4	4.4	153.33	0	14.638	10
LOC_Os05g15770.1	Q5WMX0	glycosyl hydrolase	28.8848	29.1122	28.8488	30.38	30.3921	30.4352	28.8848	29.1122	28.8488	30.38	30.3921	30.4352	11	48.5	32.549	0	125.49	53
LOC_Os05g18770.1	Q7XXP5	Sad1 / UNC-like C-terminal domain containing protein	NaN	26.1462	25.9461	27.1931	27.3016	27.1636	24.1639	26.1462	25.9461	27.1931	27.3016	27.1636	4	13	50.342	0	19.026	11
LOC_Os05g19040.1	Q6ATF8	prefoldin	24.6472	24.898	NaN	24.9045	25.7066	25.4978	24.6472	24.898	23.914	24.9045	25.7066	25.4978	2	11.3	25.221	0	5.5929	8
LOC_Os05g19380.1	Q6ATD8	pentatricopeptide	25.0937	25.1533	25.0942	NaN	24.4966	NaN	25.0937	25.1533	25.0942	24.1247	24.4966	23.3742	2	5.2	87.951	0	4.8316	4
LOC_Os05g22614.1	A0A0P0WKD6	PTAC16	33.7043	33.7026	33.7023	33.0244	33.0499	33.0251	33.7043	33.7026	33.7023	33.0244	33.0499	33.0251	22	50.3	52.345	0	323.31	223
LOC_Os05g22730.1	Q0DJF5	expressed protein	29.8904	27.714	29.5894	NaN	28.0149	26.0112	29.8904	27.714	29.5894	23.9526	28.0149	26.0112	3	27.7	12.109	0	34.225	10
LOC_Os05g22940.1	B9FK36	acetyl-CoA carboxylase	30.9036	30.9276	30.9169	30.3893	30.4527	30.5376	30.9036	30.9276	30.9169	30.3893	30.4527	30.5376	51	30.9	267.78	0	300.04	185
LOC_Os05g23420.1	Q0DJD1	sugar porter	27.5049	27.5418	27.6574	27.8181	27.9304	27.8735	27.5049	27.5418	27.6574	27.8181	27.9304	27.8735	8	21.8	48.499	0	82.109	26
LOC_Os05g23600.1	Q0DJC5	dolichyl-diphosphooligosaccharide--glycosyltransferase 67 kDasubunit precursor	27.1471	27.2452	27.0424	26.947	27.0863	26.5889	27.1471	27.2452	27.0424	26.947	27.0863	26.5889	6	13.7	69.521	0	9.1538	15
LOC_Os05g23620.3	Q0DJC3	cytochrome c1-1	30.6481	30.7456	30.6161	31.5306	31.5351	31.5555	30.6481	30.7456	30.6161	31.5306	31.5351	31.5555	2	36.2	33.293	0	169.14	87
LOC_Os05g23720.1	Q0DJC0	mitochondrial carrier protein	29.3467	29.5271	29.3406	29.8299	29.8991	29.8002	29.3467	29.5271	29.3406	29.8299	29.8991	29.8002	7	22.9	40.977	0	27.131	36
LOC_Os05g23740.1	B9FK56	DnaK family protein	31.0798	31.0592	31.0345	30.0165	30.1431	30.1579	31.0798	31.0592	31.0345	30.0165	30.1431	30.1579	14	34.4	73.549	0	202.81	90
LOC_Os05g34540.1	Q688K0	rab GDP dissociation inhibitor alpha	26.621	26.6881	26.4481	27.7831	27.522	27.7951	26.621	26.6881	26.4481	27.7831	27.522	27.7951	7	22.9	49.697	0	20.746	23
LOC_Os05g23880.1	Q0DJB6	lipoxygenase	26.3703	26.698	26.6276	27.3674	27.642	27.699	26.3703	26.698	26.6276	27.3674	27.642	27.699	7	12.4	95.342	0	17.861	20
LOC_Os05g24020.1	Q0DJA7	emp24/gp25L/p24 family protein	25.6423	25.2104	25.1196	26.3385	26.2152	26.0596	25.6423	25.2104	25.1196	26.3385	26.2152	26.0596	3	10	49.713	0	12.777	11
LOC_Os05g24601.1	Q0DJ99	coatomer subunit delta	27.2219	27.1	27.2947	27.8215	27.7759	27.7907	27.2219	27.1	27.2947	27.8215	27.7759	27.7907	4	8.4	57.502	0	33.947	19
LOC_Os05g24880.1	Q5WMV3	dehydrogenase	NaN	25.7531	26.5525	26.2011	26.0488	25.8877	23.6911	25.7531	26.5525	26.2011	26.0488	25.8877	4	21.4	36.47	0	19.87	10
LOC_Os05g25210.1	Q5W6X4	expressed protein	25.8871	26.3665	26.0078	27.7345	27.7451	27.1716	25.8871	26.3665	26.0078	27.7345	27.7451	27.1716	6	17.1	51.122	0	13.943	17
LOC_Os05g25310.2	Q5W6W7	acyl-CoA synthetase protein	27.1439	27.1207	27.0082	28.1698	28.3036	28.2978	27.1439	27.1207	27.0082	28.1698	28.3036	28.2978	7	17.4	79.878	0	25.579	25
LOC_Os05g25400.1	Q5W6V8	RNA binding protein	25.9921	26.3377	25.5897	NaN	NaN	NaN	25.9921	26.3377	25.5897	23.9325	24.6921	24.2319	3	16.6	27.778	0	21.228	7
LOC_Os05g25640.1	Q5W6F1	cytochrome P450	28.7798	28.6474	29.053	29.4679	29.5417	29.5533	28.7798	28.6474	29.053	29.4679	29.5417	29.5533	15	34.2	56.883	0	89.381	60
LOC_Os05g25840.3	B9FNW3	ELMO/CED-12 family protein	29.5992	29.4078	29.5763	28.4441	28.6179	28.2354	29.5992	29.4078	29.5763	28.4441	28.6179	28.2354	21	42.6	79.894	0	120.22	62
LOC_Os05g25850.1	Q43008	superoxide dismutase	26.5595	26.6807	26.3513	27.773	28.2639	28.3564	26.5595	26.6807	26.3513	27.773	28.2639	28.3564	5	22.9	24.997	0	13.821	9
LOC_Os05g26890.1	A0A0P0WKZ0	G-alpha subunit	25.2191	25.0313	25.5942	NaN	24.9768	NaN	25.2191	25.0313	25.5942	24.1849	24.9768	23.0607	3	11.4	40.091	0	9.2804	9
LOC_Os05g26926.1	P0DO03	chaperone dnaJ	29.8241	29.6903	29.7141	29.9756	29.9117	29.8956	29.8241	29.6903	29.7141	29.9756	29.9117	29.8956	8	19.2	48.214	0	76.141	48
LOC_Os05g27100.1	Q0DJ21	expressed protein	26.13	26.3372	25.8854	27.4627	27.4149	27.0585	26.13	26.3372	25.8854	27.4627	27.4149	27.0585	1	14	16.945	0	7.5491	10
LOC_Os05g28200.1	Q5W6H5	prenyltransferase	28.8811	28.8123	28.8107	27.0924	27.3111	27.2148	28.8811	28.8123	28.8107	27.0924	27.3111	27.2148	3	10.1	40.578	0	69.136	15
LOC_Os05g28280.1	Q5W6H1	peptidase	26.3191	26.3417	26.2582	26.1917	26.2801	26.3611	26.3191	26.3417	26.2582	26.1917	26.2801	26.3611	5	14.8	43.197	0	21.766	18
LOC_Os05g28290.1	Q0DIY4	ranBP1 domain containing protein	24.5374	25.4628	23.9469	NaN	NaN	NaN	24.5374	25.4628	23.9469	24.1849	24.0023	23.0098	3	14.5	24.083	0	5.3545	5
LOC_Os05g28510.4	Q9ZWR5	importin subunit beta	28.4722	28.3623	28.5013	27.6728	27.7561	27.6928	28.4722	28.3623	28.5013	27.6728	27.7561	27.6928	9	16.8	95.658	0	66.767	43
LOC_Os05g28740.1	B9FH86	universal stress domain containing protein	27.6721	27.7023	27.7589	29.7274	29.8715	29.992	27.6721	27.7023	27.7589	29.7274	29.8715	29.992	4	31.3	18.707	0	50.671	20
LOC_Os05g28940.1	Q5W796	GTP-binding protein	26.5317	26.0647	25.8981	26.8108	26.8787	26.7579	26.5317	26.0647	25.8981	26.8108	26.8787	26.7579	5	20.1	44.647	0	12.384	12
LOC_Os05g29760.3	A0A0P0WLC1	ferrochelatase-2	28.1467	28.2365	28.2086	NaN	NaN	NaN	28.1467	28.2365	28.2086	23.5007	23.8152	23.6873	10	33.9	44.123	0	20.267	18
LOC_Os05g29860.3	Q6L4L8	mitochondrial carrier protein	27.3833	27.6655	27.6428	NaN	26.7763	26.8833	27.3833	27.6655	27.6428	23.8375	26.7763	26.8833	4	21.7	25.5	0	16.249	12
LOC_Os05g29990.1	Q6I683	NAD dependent epimerase/dehydratase family domain containing protein	27.9477	28.0832	28.1265	29.2635	29.112	29.0618	27.9477	28.0832	28.1265	29.2635	29.112	29.0618	3	29.1	48.708	0	103.44	37
LOC_Os05g30970.1	A0A0P0WLH0	copine	24.2439	24.676	NaN	25.9083	26.0783	26.0879	24.2439	24.676	22.6757	25.9083	26.0783	26.0879	2	7	64.936	0	7.1331	7
LOC_Os05g31000.1	Q7XXR8	nascent polypeptide-associated complex subunit alpha	26.3346	26.5562	26.5037	26.3452	26.4411	26.4577	26.3346	26.5562	26.5037	26.3452	26.4411	26.4577	3	37.1	22.277	0	21.666	11
LOC_Os05g31140.3	Q75K72	glycosyl hydrolases family 17	25.5567	NaN	24.9946	27.1232	27.3543	27.6808	25.5567	23.9646	24.9946	27.1232	27.3543	27.6808	4	20	31.337	0	41.144	19
LOC_Os05g31750.1	B7E4J4	annexin	29.9144	30.0417	29.9783	32.0714	31.9887	32.0869	29.9144	30.0417	29.9783	32.0714	31.9887	32.0869	10	37.6	35.369	0	85.394	59
LOC_Os05g31760.1	Q6L4C5	annexin	27.0636	27.2391	27.1357	29.7797	29.6301	29.6867	27.0636	27.2391	27.1357	29.7797	29.6301	29.6867	7	29.3	40.262	0	73.084	35
LOC_Os05g31770.1	Q0DIK0	tetratricopeptide repeat containing protein	25.9631	26.1701	26.1682	26.164	25.9487	26.4745	25.9631	26.1701	26.1682	26.164	25.9487	26.4745	2	17.1	17.893	0	65.209	17
LOC_Os05g32140.1	Q60E66	NAD dependent epimerase/dehydratase family protein	24.8944	24.5111	24.8923	NaN	24.9431	NaN	24.8944	24.5111	24.8923	24.0296	24.9431	23.6608	2	5.2	52.87	0	66.198	7
LOC_Os05g32220.1	Q60E59	L1P family of ribosomal proteins domain containing protein	29.8392	29.9684	29.8655	28.9438	29.0522	29.154	29.8392	29.9684	29.8655	28.9438	29.0522	29.154	8	23.4	38.78	0	40.663	43
LOC_Os05g32230.1	Q60E58	expressed protein;LOC_Os01g72710.1 LOC_Os01g72710.1	30.0709	30.0924	29.961	29.2514	29.4761	29.2415	30.0709	30.0924	29.961	29.2514	29.4761	29.2415	6	18.5	40.403	0	67.598	26
LOC_Os05g32390.1	B9FI28	FZL	28.8902	28.7679	28.6899	28.0417	28.0255	28.07	28.8902	28.7679	28.6899	28.0417	28.0255	28.07	16	22.8	100.49	0	155.27	56
LOC_Os05g32630.1	Q60ER7	mitochondrial carrier protein	26.736	26.4981	26.428	26.923	27.3354	27.3276	26.736	26.4981	26.428	26.923	27.3354	27.3276	4	16.7	36.12	0	22.613	13
LOC_Os05g32850.2	Q6AU71	CBS domain containing protein	25.5157	25.6462	25.9405	26.4851	26.0501	26.102	25.5157	25.6462	25.9405	26.4851	26.0501	26.102	5	12.4	54.452	0	14.319	8
LOC_Os05g33100.1	Q688M9	endo-1	26.2358	26.2632	26.222	25.8677	26.0182	25.8909	26.2358	26.2632	26.222	25.8677	26.0182	25.8909	4	18.3	25.769	0	5.4852	8
LOC_Os05g33210.2	Q0DIC9	cytochrome b-c1 complex subunit 9	29.7181	29.7201	29.6439	29.8914	30.0194	30.0105	29.7181	29.7201	29.6439	29.8914	30.0194	30.0105	5	50	7.0761	0	64.816	27
LOC_Os05g33280.1	Q6ATY4	thylakoid lumen protein	32.8155	32.7629	32.786	31.2348	31.2009	31.2254	32.8155	32.7629	32.786	31.2348	31.2009	31.2254	7	25.2	38.027	0	71.325	56
LOC_Os05g33290.1	A0A0P0WMB8	uncharacterized conserved membrane specific to cyanobacteria	30.1448	30.1874	30.0496	28.9894	29.0505	29.0682	30.1448	30.1874	30.0496	28.9894	29.0505	29.0682	4	28.4	22.334	0	30.794	24
LOC_Os05g33380.1	P17784	fructose-bisphospate aldolase isozyme	26.0801	26.5616	26.3446	28.1174	27.9634	27.7419	26.0801	26.5616	26.3446	28.1174	27.9634	27.7419	3	22.6	38.863	0	13.288	16
LOC_Os05g33390.1	A0A0P0WM50	cation-transporting ATPase	26.9813	27.1454	26.9931	27.7491	27.7629	27.6619	26.9813	27.1454	26.9931	27.7491	27.7629	27.6619	10	9.5	134.32	0	29.345	33
LOC_Os05g33570.2	Q6AVA8	pyruvate	28.9296	28.8985	28.9446	29.2656	29.1427	29.0805	28.9296	28.8985	28.9446	29.2656	29.1427	29.0805	14	27.7	96.228	0	51.583	62
LOC_Os05g33620.1	B9FID6	expressed protein	26.5024	26.27	26.6148	27.4849	27.5617	27.3337	26.5024	26.27	26.6148	27.4849	27.5617	27.3337	6	23.2	38.542	0	25.63	15
LOC_Os05g33840.1	O22567	transketolase	26.3148	25.7223	25.7141	25.6744	25.7984	NaN	26.3148	25.7223	25.7141	25.6744	25.7984	24.2534	5	14.2	77.303	0	12.48	11
LOC_Os05g34270.1	Q6AUA1	inactive receptor kinase At1g27190 precursor	NaN	NaN	NaN	25.9907	26.0629	25.9237	24.4318	23.6527	23.6978	25.9907	26.0629	25.9237	2	3.6	67.236	0	4.83	6
LOC_Os05g34630.1	Q60DW4	hydrolase	27.9833	28.3653	28.2107	27.5808	27.4708	27.5503	27.9833	28.3653	28.2107	27.5808	27.4708	27.5503	7	27.3	42.773	0	43.089	25
LOC_Os05g34770.1	Q0DI31	cytochrome c	27.5105	27.6749	27.6899	27.4285	27.4915	27.5362	27.5105	27.6749	27.6899	27.4285	27.4915	27.5362	3	27.7	12.271	0	11.01	12
LOC_Os05g35460.1	Q5TKJ2	patellin protein	29.8597	30.0554	29.987	31.8602	31.863	31.8207	29.8597	30.0554	29.987	31.8602	31.863	31.8207	15	40.3	63.947	0	139.27	100
LOC_Os05g35710.2	Q6I5U8	coiled-coil domain-containing 47 precursor	27.3308	27.6562	27.6971	26.3032	26.6089	26.4128	27.3308	27.6562	27.6971	26.3032	26.6089	26.4128	7	19	53.942	0	74.359	25
LOC_Os05g36290.2	Q75HX0	actin	NaN	NaN	NaN	27.7102	27.8526	27.5545	24.1367	24.7805	23.0381	27.7102	27.8526	27.5545	2	19.6	40.437	0	9.0172	7
LOC_Os05g36360.1	Q75HW6	U-box domain containing protein	24.3562	NaN	24.1168	24.6467	24.5148	24.5267	24.3562	24.1119	24.1168	24.6467	24.5148	24.5267	2	5.3	46.298	0	6.754	9
LOC_Os05g37330.1	Q65WT5	60S acidic ribosomal protein	27.6567	27.6451	27.8805	29.3343	29.2604	29.1676	27.6567	27.6451	27.8805	29.3343	29.2604	29.1676	6	54	11.599	0	76.868	34
LOC_Os05g38150.2	O04226	amino acid kinase	28.458	28.5848	28.6387	29.6987	29.7312	29.8425	28.458	28.5848	28.6387	29.6987	29.7312	29.8425	16	27.9	77.744	0	95.802	58
LOC_Os05g38160.1	B7E4Q0	prenylated rab acceptor	25.5728	25.6412	25.5127	26.0929	26.1553	26.396	25.5728	25.6412	25.5127	26.0929	26.1553	26.396	3	20.6	24.267	0	8.4091	11
LOC_Os05g38170.1	Q60EM2	phosphoribosyl transferase	26.71	26.3305	26.4954	27.5836	27.7152	27.7829	26.71	26.3305	26.4954	27.5836	27.7152	27.7829	6	25.6	31.628	0	31.762	19
LOC_Os05g38400.3	Q0DHL4	OsFtsH8 FtsH protease	26.6959	26.7007	26.49	27.331	27.2052	27.5084	26.6959	26.7007	26.49	27.331	27.2052	27.5084	7	13.9	73.648	0	23.385	20
LOC_Os05g38570.1	Q6L506	riboflavin biosynthesis ribAB	27.4982	27.6415	27.5287	27.6072	27.4159	27.6086	27.4982	27.6415	27.5287	27.6072	27.4159	27.6086	6	20.5	57.326	0	36.318	28
LOC_Os05g38610.1	Q9MAX5	clathrin adaptor complex small chain domain containing protein	26.6812	26.2742	26.6846	26.488	26.6699	26.5862	26.6812	26.2742	26.6846	26.488	26.6699	26.5862	1	20.3	19.369	0	72.465	15
LOC_Os05g38810.1	B9FJJ1	PWWP domain containing protein	25.6788	25.2666	25.3756	25.6586	25.9069	25.6726	25.6788	25.2666	25.3756	25.6586	25.9069	25.6726	5	5.7	152.39	0	13.571	10
LOC_Os05g39390.1	Q6ATX4	outer membrane protein	27.5207	27.4189	27.6407	28.5319	28.5079	28.5537	27.5207	27.4189	27.6407	28.5319	28.5079	28.5537	7	14.6	56.368	0	30.971	29
LOC_Os05g39760.1	Q65WV7	VHS and GAT domain containing protein	24.1331	24.0007	24.0231	25.2638	25.1384	26.4221	24.1331	24.0007	24.0231	25.2638	25.1384	26.4221	3	6.4	68.113	0	9.5079	6
LOC_Os05g40180.1	A0A0P0WNT5	serine/threonine-kinase stt7	29.6641	29.7071	29.7742	28.1333	28.1823	28.2544	29.6641	29.7071	29.7742	28.1333	28.1823	28.2544	8	18.4	63.254	0	100.63	41
LOC_Os05g41172.2	Q6F322	histone-lysine N-methyltransferase	25.5432	25.5304	25.5379	25.8363	25.8372	25.7376	25.5432	25.5304	25.5379	25.8363	25.8372	25.7376	4	10.1	73.563	0	19.305	12
LOC_Os05g41190.2	Q6F333	expressed protein;LOC_Os05g41190.1 LOC_Os05g41190.1	27.8077	27.8807	27.857	26.8452	26.9158	26.9797	27.8077	27.8807	27.857	26.8452	26.9158	26.9797	3	19.5	13.169	0	26.348	15
LOC_Os05g41210.1	Q6F332	OsCam2 - Calmodulin	27.473	27.6307	27.2829	29.3897	29.5102	29.4561	27.473	27.6307	27.2829	29.3897	29.5102	29.4561	1	52.3	16.818	0	84.429	28
LOC_Os05g41440.2	Q0DH37	cytochrome P450	27.0879	NaN	NaN	27.1059	27.1296	27.1035	27.0879	23.3208	23.1594	27.1059	27.1296	27.1035	3	9.4	41.332	0	8.8987	9
LOC_Os05g41640.2	A0A0P0WP33	phosphoglycerate kinase protein	35.3429	35.315	35.3848	35.25	35.2035	35.1949	35.3429	35.315	35.3848	35.25	35.2035	35.1949	25	54.3	50.137	0	323.31	331
LOC_Os05g42100.1	Q6AUW4	expressed protein	26.6369	26.646	27.0997	27.2596	27.1963	27.3979	26.6369	26.646	27.0997	27.2596	27.1963	27.3979	4	18.5	36.399	0	41.372	14
LOC_Os05g42230.1	Q60EJ0	universal stress domain containing protein	24.4922	24.459	24.5403	25.1373	25.6153	25.6084	24.4922	24.459	24.5403	25.1373	25.6153	25.6084	2	13.1	28.321	0	4.8498	5
LOC_Os05g42280.1	Q60EI6	expressed protein	26.8067	25.6614	24.9028	NaN	NaN	NaN	26.8067	25.6614	24.9028	24.0795	22.7282	23.8135	2	6	24.755	0	13.799	6
LOC_Os05g42330.1	Q60EA5	secretory carrier-associated membrane protein	25.8456	25.5946	NaN	24.8436	25.0703	25.251	25.8456	25.5946	23.2613	24.8436	25.0703	25.251	3	17.7	31.542	0	9.9216	9
LOC_Os05g42350.1	Q60EA3	ferredoxin--nitrite reductase	24.6824	25.1834	24.9468	NaN	NaN	NaN	24.6824	25.1834	24.9468	23.1519	23.7881	24.4492	3	6.9	70.572	0	19.18	7
LOC_Os05g43360.1	Q6L4W7	NADH dehydrogenase flavo2	29.254	29.341	29.041	29.6059	29.3164	29.4246	29.254	29.341	29.041	29.6059	29.3164	29.4246	8	37.2	30.055	0	19.364	31
LOC_Os05g43650.1	B9FL32	expressed protein	26.655	26.6637	26.4144	24.7663	NaN	NaN	26.655	26.6637	26.4144	24.7663	23.9886	22.968	6	19	49.09	0	15.494	14
LOC_Os05g43670.1	Q6L529	IQ calmodulin-binding motif family protein	24.8458	NaN	NaN	24.5601	24.6909	24.8919	24.8458	24.0021	23.755	24.5601	24.6909	24.8919	2	9.5	44.961	0	10.335	5
LOC_Os05g44050.1	Q75IJ1	ras-related protein	NaN	NaN	NaN	28.2271	28.2366	28.4857	23.714	23.8399	24.0703	28.2271	28.2366	28.4857	2	48.1	22.996	0	15.734	8
LOC_Os05g44100.1	Q75II7	trehalose synthase	25.9141	25.9438	26.2731	25.3339	25.9254	NaN	25.9141	25.9438	26.2731	25.3339	25.9254	24.5443	5	12.7	100.53	0	28.125	7
LOC_Os05g44310.1	Q65X08	vesicle-fusing ATPase	29.2298	29.2959	28.9917	29.3141	29.2578	29.302	29.2298	29.2959	28.9917	29.3141	29.2578	29.302	18	34.7	81.128	0	196.16	61
LOC_Os05g44360.2	A0A0P0WPW2	oligosaccharyl transferase	NaN	NaN	NaN	26.269	26.2664	26.1376	23.1388	22.7874	24.898	26.269	26.2664	26.1376	3	8.8	62.534	0	11.163	11
LOC_Os05g44760.1	Q5W676	hexokinase	30.1718	30.2728	30.2093	31.0167	31.0813	31.0623	30.1718	30.2728	30.2093	31.0167	31.0813	31.0623	13	42.6	54.658	0	153.47	87
LOC_Os05g44770.1	Q5W675	receptor-like kinase 5 precursor	26.7811	26.6713	26.687	28.4617	28.7588	28.6018	26.7811	26.6713	26.687	28.4617	28.7588	28.6018	1	2.2	111.73	0	3.7047	6
LOC_Os05g45030.1	Q65X91	calcium homeostasis regulator CHoR1	28.0074	27.964	27.4879	27.0936	26.941	26.3626	28.0074	27.964	27.4879	27.0936	26.941	26.3626	7	27.7	29.867	0	44.38	23
LOC_Os05g45180.1	Q65XD0	anthocyanidin 5	NaN	NaN	NaN	26.0495	25.7385	25.4993	24.6113	25.0388	23.3856	26.0495	25.7385	25.4993	3	10.3	52.944	0	15.871	7
LOC_Os05g45280.1	Q65XC4	of unknown function DUF502 domain containing protein	NaN	NaN	NaN	24.6914	24.6868	24.9855	23.9133	22.3705	23.0098	24.6914	24.6868	24.9855	2	11.7	29.858	0	4.1629	2
LOC_Os05g45320.2	Q75K68	ubiquitin domain-containing 1	26.2408	26.059	26.0249	26.8392	26.7057	27.1467	26.2408	26.059	26.0249	26.8392	26.7057	27.1467	3	17.7	12.617	0	9.6996	8
LOC_Os05g45350.2	Q65XB8	dnaJ domain containing protein	NaN	NaN	NaN	25.4505	25.6394	25.6076	23.8723	23.6835	22.7857	25.4505	25.6394	25.6076	2	11.9	38.469	0	7.1489	6
LOC_Os05g45420.3	Q852Q2	CAMK_KIN1/SNF1/Nim1_like_AMPKh.3 - CAMK includes calcium/calmodulin depedent kinases	24.8562	24.9872	24.9686	25.3985	25.1413	NaN	24.8562	24.9872	24.9686	25.3985	25.1413	22.984	2	8.1	57.614	0	3.9864	4
LOC_Os05g45660.2	B9FLA5	plasminogen activator inhibitor 1 RNA-binding protein	27.9384	27.7273	27.6954	NaN	NaN	NaN	27.9384	27.7273	27.6954	23.4395	23.8999	24.3299	5	18.1	40.369	0	26.021	10
LOC_Os05g45720.1	Q84VC7	starch synthase	25.7787	25.7132	25.7391	NaN	25.4769	25.119	25.7787	25.7132	25.7391	24.0195	25.4769	25.119	3	6.7	104.18	0	16.187	9
LOC_Os05g45740.2	Q6I5G9	mitochondrial ATP synthase g subunit family protein	25.4903	25.6306	25.8219	25.857	26.2385	26.365	25.4903	25.6306	25.8219	25.857	26.2385	26.365	2	15.2	14.175	0	3.6811	6
LOC_Os05g45950.1	Q6L5I5	outer mitochondrial membrane porin	32.9115	33.1022	33.0952	33.5368	33.7938	33.9045	32.9115	33.1022	33.0952	33.5368	33.7938	33.9045	12	65.4	29.602	0	269.12	162
LOC_Os05g46230.1	Q53WK4	NAP domain containing protein	27.1858	26.9039	26.847	26.9815	27.08	27.2419	27.1858	26.9039	26.847	26.9815	27.08	27.2419	6	24.7	41.683	0	28.765	20
LOC_Os05g46260.1	Q53WK1	exostosin	NaN	NaN	NaN	25.099	24.85	24.9695	23.8557	23.8286	24.3018	25.099	24.85	24.9695	2	2.7	98.908	0	4.2077	6
LOC_Os05g46290.1	Q5TKQ5	T-complex protein	25.3799	25.4395	25.2153	25.5096	NaN	NaN	25.3799	25.4395	25.2153	25.5096	24.3779	24.7156	2	4.6	61.588	0	3.2855	3
LOC_Os05g46430.1	Q5TKP3	60S ribosomal L28-1	28.4158	28.9221	28.7203	29.197	29.3167	29.2192	28.4158	28.9221	28.7203	29.197	29.3167	29.2192	3	22.4	16.606	0	33.012	15
LOC_Os05g46450.1	Q5TKP1	fiber Fb11	25.0986	NaN	NaN	25.9742	26.161	26.1825	25.0986	23.3358	22.1124	25.9742	26.161	26.1825	1	26.2	6.9243	0	7.9924	11
LOC_Os05g46560.2	Q65XN1	RAN GTPase-activating 1	27.2786	27.3319	27.0896	27.7966	27.8244	27.7572	27.2786	27.3319	27.0896	27.7966	27.8244	27.7572	8	21.3	59.635	0	33.825	19
LOC_Os05g47470.2	Q5KQD2	VIP1 protein	27.9029	27.9204	27.6132	28.9025	28.9457	28.8582	27.9029	27.9204	27.6132	28.9025	28.9457	28.8582	9	38.9	21.685	0	29.171	26
LOC_Os05g47550.1	Q0DG77	ANTH/ENTH domain containing protein	25.3297	25.3664	25.1753	25.8389	26.1886	26.3068	25.3297	25.3664	25.1753	25.8389	26.1886	26.3068	4	7.8	63.048	0	6.9982	8
LOC_Os05g47560.1	Q0DG76	serine/threonine-kinase SNT7	31.5836	31.6294	31.6293	29.9772	29.9591	30.0561	31.5836	31.6294	31.6293	29.9772	29.9591	30.0561	13	28.3	62.386	0	126.32	65
LOC_Os05g47890.1	Q6L4F8	WD domain	25.9494	NaN	25.8656	26.7791	27.1131	26.7103	25.9494	22.9908	25.8656	26.7791	27.1131	26.7103	4	20.8	36.452	0	17.874	14
LOC_Os05g47980.1	A0A067Y2M2	ATP synthase	34.3565	34.4017	34.4227	34.3761	34.2619	34.3406	34.3565	34.4017	34.4227	34.3761	34.2619	34.3406	2	72.5	58.933	0	323.31	375
LOC_Os05g48020.1	Q6AUC0	SNARE domain containing protein	28.8034	28.8554	28.7592	29.5316	29.5202	29.5822	28.8034	28.8554	28.7592	29.5316	29.5202	29.5822	10	35.5	35.555	0	47.424	59
LOC_Os05g48200.1	Q0DG35	glutamate synthase	25.3621	25.6849	25.4074	NaN	NaN	NaN	25.3621	25.6849	25.4074	23.7969	24.0671	23.4011	3	2.4	239.45	0	11.797	4
LOC_Os05g48310.2	Q6I608	60S ribosomal L35a-3	27.4133	27.425	27.1955	27.6537	27.7305	27.6217	27.4133	27.425	27.1955	27.6537	27.7305	27.6217	2	31.5	12.661	0	6.1911	8
LOC_Os05g48240.1	Q0DG31	dynamin family protein	29.1304	29.1678	29.1024	29.641	29.703	29.3214	29.1304	29.1678	29.1024	29.641	29.703	29.3214	16	30.7	68.683	0	104.1	66
LOC_Os05g48340.1	Q6I605	proteasome-related	25.3926	25.6127	25.2991	26.7173	26.7287	26.8566	25.3926	25.6127	25.2991	26.7173	26.7287	26.8566	3	7.8	57.468	0	10.078	11
LOC_Os05g48450.6	Q6AT43	aminotransferase domain containing protein	25.6827	25.5729	25.5892	26.5383	26.3305	26.4653	25.6827	25.5729	25.5892	26.5383	26.3305	26.4653	3	9.5	44.211	0	15.07	7
LOC_Os05g48630.2	Q0DG05	expressed protein	33.0681	33.3627	33.2333	31.7904	31.6694	31.3852	33.0681	33.3627	33.2333	31.7904	31.6694	31.3852	4	39.4	15.043	0	56.862	139
LOC_Os05g48750.1	Q688Y2	3-deoxy-manno-octulosonate cytidylyltransferase	27.3434	27.3706	27.4388	27.7915	27.7954	27.798	27.3434	27.3706	27.4388	27.7915	27.7954	27.798	4	20.5	32.34	0	26.567	17
LOC_Os05g48855.1	B9FI48	GTP binding protein	NaN	NaN	NaN	24.9733	24.7453	24.8329	23.4681	24.1194	23.6447	24.9733	24.7453	24.8329	2	11.2	27.697	0	6.3026	4
LOC_Os05g48900.1	Q6AUG3	fasciclin domain containing protein	26.1621	26.2236	25.4447	NaN	24.838	24.6721	26.1621	26.2236	25.4447	24.6403	24.838	24.6721	2	13.6	27.952	0	30.782	10
LOC_Os05g48960.4	Q6AUG0	splicing factor U2AF	27.5673	NaN	27.9031	26.8318	26.3158	26.2957	27.5673	23.4613	27.9031	26.8318	26.3158	26.2957	3	8.9	34.692	0	26.069	10
LOC_Os05g49050.1	Q6AUF3	CobW/P47K family protein	25.395	24.9533	25.4325	26.0428	25.8607	26.8445	25.395	24.9533	25.4325	26.0428	25.8607	26.8445	3	15.1	30.781	0	12.047	6
LOC_Os05g49150.1	Q688X1	eukaryotic translation initiation factor 3 subunit D	27.3934	27.0702	27.3562	27.253	27.4309	27.3281	27.3934	27.0702	27.3562	27.253	27.4309	27.3281	7	17.4	65.08	0	56.649	24
LOC_Os05g49200.2	Q0DFW1	aspartic proteinase oryzasin-1 precursor	27.2923	27.2846	27.4192	27.8986	27.7167	27.6584	27.2923	27.2846	27.4192	27.8986	27.7167	27.6584	6	19.6	54.073	0	27.713	27
LOC_Os05g49270.1	Q688W0	transporter family protein	26.5912	26.8614	26.6469	27.1144	27.0646	27.0112	26.5912	26.8614	26.6469	27.1144	27.0646	27.0112	4	13.4	53.8	0	22.897	26
LOC_Os05g49380.2	Q6AUN5	OsDegp9 - Putative Deg protease homologue	28.8547	28.7826	28.7452	28.9743	29.1597	29.0423	28.8547	28.7826	28.7452	28.9743	29.1597	29.0423	9	32.5	45.529	0	94.487	45
LOC_Os05g49800.1	Q65XK0	ketol-acid reductoisomerase	28.0634	27.9807	28.1481	26.8932	26.9178	26.8495	28.0634	27.9807	28.1481	26.8932	26.9178	26.8495	6	14.7	62.376	0	17.151	16
LOC_Os05g49880.1	Q6F361	lactate/malate dehydrogenase	26.2116	26.6214	26.6341	26.8221	26.3649	26.304	26.2116	26.6214	26.6341	26.8221	26.3649	26.304	2	27.6	35.435	0	31.94	11
LOC_Os05g49970.2	Q0DFR3	translation initiation factor IF-2	29.884	30.0572	30.0404	29.4317	29.3452	29.419	29.884	30.0572	30.0404	29.4317	29.3452	29.419	9	29.3	58.296	0	116.8	66
LOC_Os05g50200.2	Q6L5F2	expressed protein;LOC_Os05g50200.1 LOC_Os05g50200.1	23.7047	23.6825	24.1026	NaN	NaN	NaN	23.7047	23.6825	24.1026	23.5747	25.2966	24.3182	3	13.4	47.519	0	4.4434	4
LOC_Os05g50624.1	B9FLT3	transposon protein	26.1082	25.9774	26.1399	NaN	26.8	26.6061	26.1082	25.9774	26.1399	23.9281	26.8	26.6061	3	34.1	57.749	0	9.3414	11
LOC_Os05g50710.1	Q75HZ0	late embryogenesis abundant protein	25.6235	25.8724	25.1338	NaN	24.8958	NaN	25.6235	25.8724	25.1338	24.5285	24.8958	24.771	2	18.5	16.546	0	4.4091	7
LOC_Os05g50840.1	Q6I583	mitochondrial carrier protein	27.4089	27.4317	27.464	26.7661	27.1177	27.0543	27.4089	27.4317	27.464	26.7661	27.1177	27.0543	6	25.4	38.738	0	40.542	21
LOC_Os05g51070.1	Q6L569	inactive receptor kinase At2g26730 precursor	26.6422	26.6375	26.5629	26.9231	26.9741	26.8723	26.6422	26.6375	26.5629	26.9231	26.9741	26.8723	5	10.7	74.288	0	26.976	23
LOC_Os05g51140.2	B7E741	expressed protein	26.4828	26.7987	26.7436	27.4793	27.5946	27.4242	26.4828	26.7987	26.7436	27.4793	27.5946	27.4242	4	16.5	39.513	0	51.765	15
LOC_Os05g51180.1	Q6L561	hyaluronan/mRNA binding family domain containing protein	28.2768	28.2964	28.4531	NaN	NaN	NaN	28.2768	28.2964	28.4531	24.4431	24.0366	23.9014	3	26.6	41.028	0	49.329	18
LOC_Os05g51420.7	Q6L4S3	hypersensitive-induced response protein	29.3915	29.3964	29.3312	30.8507	30.9233	30.8874	29.3915	29.3964	29.3312	30.8507	30.9233	30.8874	5	30.2	31.621	0	50.039	40
LOC_Os05g51450.1	Q6L4S1	OsClp8 - Putative Clp protease homologue	27.6923	27.8288	28.3121	28.6526	28.6815	28.8076	27.6923	27.8288	28.3121	28.6526	28.6815	28.8076	8	22.8	42.748	0	14.45	23
LOC_Os05g51480.2	Q6L4S0	cleavage and polyadenylation specificity factor	24.7585	24.2902	24.7268	26.3205	25.7866	25.3659	24.7585	24.2902	24.7268	26.3205	25.7866	25.3659	4	4.3	111.64	0	6.7217	7
LOC_Os05g51490.2	Q6L4R9	SIT4 phosphatase-associated domain containing protein	25.1167	NaN	25.0941	25.9293	26.3075	26.016	25.1167	23.6904	25.0941	25.9293	26.3075	26.016	3	4.9	85.039	0	6.0203	9
LOC_Os05g51500.1	Q6L4R8	eukaryotic translation initiation factor 5B	26.1891	26.281	25.3875	NaN	25.7314	25.5506	26.1891	26.281	25.3875	24.3249	25.7314	25.5506	5	6.7	134.38	0	24.655	13
LOC_Os05g51530.2	Q6L4R5	vacuolar ATP synthase subunit C	29.2922	29.721	29.5603	30.8527	30.6215	30.8114	29.2922	29.721	29.5603	30.8527	30.6215	30.8114	10	38.5	42.678	0	62.531	49
LOC_Os05g51540.1	Q0DFF8	expressed protein	28.3363	28.1012	28.2646	28.6204	28.9235	28.8471	28.3363	28.1012	28.2646	28.6204	28.9235	28.8471	4	31	17.436	0	45.213	15
LOC_Os05g51700.2	Q5TKF4	nucleoside diphosphate kinase	27.1096	26.9072	27.0689	27.5457	27.36	27.5419	27.1096	26.9072	27.0689	27.5457	27.36	27.5419	3	15	23.463	0	10.993	19
LOC_Os06g01250.1	Q5VRI5	cytochrome P450	27.7669	27.0584	27.3411	25.5035	25.8617	25.0481	27.7669	27.0584	27.3411	25.5035	25.8617	25.0481	10	23.6	56.68	0	25.837	17
LOC_Os06g01390.1	Q8H631	acyl-coenzyme A oxidase 1.2	25.3808	25.4634	25.4244	28.5879	28.5755	28.6448	25.3808	25.4634	25.4244	28.5879	28.5755	28.6448	7	14.1	74.393	0	39.518	22
LOC_Os06g01400.1	Q5VRH2	glycyl-tRNA synthetase 2	27.3325	27.3387	27.4793	26.8099	26.6902	26.8761	27.3325	27.3387	27.4793	26.8099	26.6902	26.8761	9	13.1	119.16	0	21.14	25
LOC_Os06g01500.3	Q5VS79	IQ calmodulin-binding motif family protein	30.2296	30.395	30.3995	28.7821	29.035	29.1184	30.2296	30.395	30.3995	28.7821	29.035	29.1184	9	20.5	48.394	0	81.036	59
LOC_Os06g01690.1	Q9LWY6	septum site-determining minD	NaN	NaN	NaN	24.4078	24.4382	24.3452	23.9412	23.2701	23.5888	24.4078	24.4382	24.3452	2	10.8	32.341	0	4.3514	4
LOC_Os06g01850.1	P41344	ferredoxin--NADP reductase	33.3848	33.2602	33.1727	29.8239	30.0123	29.894	33.3848	33.2602	33.1727	29.8239	30.0123	29.894	14	42.3	40.008	0	239.23	141
LOC_Os06g02130.1	Q9LI02	G-alpha subunit	NaN	24.2899	24.1896	26.1593	26.0697	26.0252	22.9532	24.2899	24.1896	26.1593	26.0697	26.0252	2	3	97.828	0	4.9392	7
LOC_Os06g02144.2	Q9LI00	6-phosphogluconate dehydrogenase	25.9407	25.9446	25.7452	27.0268	26.996	26.9356	25.9407	25.9446	25.7452	27.0268	26.996	26.9356	5	15.2	52.721	0	13.096	17
LOC_Os06g02370.1	Q9LWT7	expressed protein;LOC_Os06g02370.3 LOC_Os06g02370.3	27.2994	27.198	27.2166	28.9148	28.6388	28.6508	27.2994	27.198	27.2166	28.9148	28.6388	28.6508	4	6.2	62.787	0	18.906	24
LOC_Os06g02380.2	Q9LWT6	T-complex protein	33.1455	33.22	33.2361	32.876	32.832	32.8134	33.1455	33.22	33.2361	32.876	32.832	32.8134	24	56.6	64.085	0	323.31	212
LOC_Os06g02420.1	Q9LWT2	ATOZI1	30.041	29.911	30.1369	28.6845	29.3683	29.9094	30.041	29.911	30.1369	28.6845	29.3683	29.9094	3	44.3	8.786	0	68.608	24
LOC_Os06g02470.1	Q9LWS6	ATOZI1	27.2564	NaN	27.2165	28.5842	27.9126	28.432	27.2564	23.5066	27.2165	28.5842	27.9126	28.432	2	35.1	8.4025	0	21.683	10
LOC_Os06g02480.1	Q8H668	expressed protein	NaN	25.3905	NaN	25.6969	25.6804	25.7781	22.9804	25.3905	23.4189	25.6969	25.6804	25.7781	3	8.3	68.218	0	4.5768	6
LOC_Os06g02510.3	Q9LWS2	ribosomal L13	28.5715	28.5501	28.205	28.4477	28.5326	28.6286	28.5715	28.5501	28.205	28.4477	28.5326	28.6286	2	30.8	24.054	0	66.351	31
LOC_Os06g03740.1	Q9SNU8	folic acid binding protein	24.7271	24.7759	24.902	25.094	25.1509	25.103	24.7271	24.7759	24.902	25.094	25.1509	25.103	3	13.5	31.723	0	10.234	10
LOC_Os06g03770.1	Q658I3	ABC transporter	27.3765	27.3638	27.3612	27.5678	27.7041	27.651	27.3765	27.3638	27.3612	27.5678	27.7041	27.651	6	13.2	80.297	0	48.028	23
LOC_Os06g03860.1	Q658H5	uncharacterized membrane protein	26.1347	25.5563	NaN	28.6233	27.6694	28.0444	26.1347	25.5563	21.9215	28.6233	27.6694	28.0444	3	8.3	77.649	0	37.042	15
LOC_Os06g03990.1	Q9SNN8	aminotransferase	26.9666	26.7117	26.9832	26.4414	26.6909	26.7776	26.9666	26.7117	26.9832	26.4414	26.6909	26.7776	7	17.3	59.474	0	21.234	19
LOC_Os06g04150.1	Q9SNL7	magnesium-protoporphyrin O-methyltransferase	29.9892	30.0099	30.5271	29.0534	28.8382	28.9722	29.9892	30.0099	30.5271	29.0534	28.8382	28.9722	9	23	34.926	0	66.089	44
LOC_Os06g04270.1	Q84ZY2	transketolase	31.5657	31.5722	31.6261	31.0037	31.0622	30.9215	31.5657	31.5722	31.6261	31.0037	31.0622	30.9215	15	29.7	80.028	0	85.87	71
LOC_Os06g04460.1	Q5VNU2	hypersensitive-induced response protein	25.6522	25.4133	25.3348	27.4896	27.4146	27.1161	25.6522	25.4133	25.3348	27.4896	27.4146	27.1161	4	16.3	32.14	0	11.374	10
LOC_Os06g04510.1	Q5VNT9	enolase	28.0879	28.0271	28.2395	27.3153	27.3754	27.5101	28.0879	28.0271	28.2395	27.3153	27.3754	27.5101	6	34.1	47.938	0	65.578	31
LOC_Os06g04530.1	Q5VQ13	OsClp9 - Putative Clp protease homologue	24.5862	25.0416	25.0333	27.6893	27.7089	27.6793	24.5862	25.0416	25.0333	27.6893	27.7089	27.6793	3	13.5	32.224	0	53.731	12
LOC_Os06g05180.2	Q5VQ78	coatomer subunit beta	26.2579	26.3936	26.0041	27.3996	27.4531	27.1956	26.2579	26.3936	26.0041	27.3996	27.4531	27.1956	5	11.7	102.89	0	18.475	17
LOC_Os06g05350.1	Q5VP52	whirly transcription factor domain containing protein	26.5357	27.8087	27.0148	NaN	25.4435	25.6548	26.5357	27.8087	27.0148	25.0767	25.4435	25.6548	4	19.1	30.161	0	50.858	7
LOC_Os06g05390.1	B9FRH0	expressed protein;LOC_Os06g05390.2 LOC_Os06g05390.2	26.0899	NaN	NaN	25.2038	25.5283	25.5277	26.0899	23.6575	23.8862	25.2038	25.5283	25.5277	3	13.5	37.132	0	5.1982	10
LOC_Os06g05660.3	Q5VND6	NAP domain containing protein	26.5664	26.3115	26.2261	26.1824	26.0091	26.3829	26.5664	26.3115	26.2261	26.1824	26.0091	26.3829	5	22.8	42.151	0	10.939	7
LOC_Os06g05880.1	Q5VMJ3	profilin domain containing protein	NaN	NaN	NaN	25.7757	25.7703	25.845	22.9064	23.0435	22.9687	25.7757	25.7703	25.845	2	24.4	14.133	0	5.8952	6
LOC_Os06g06090.2	Q84UI5	CGMC_MAPKCMGC_2_ERK.12 - CGMC includes CDA	26.2644	25.756	26.0052	26.013	25.786	25.97	26.2644	25.756	26.0052	26.013	25.786	25.97	3	13.4	39.582	0	10.79	15
LOC_Os06g06190.1	Q5VMB3	uncharacterized ycf45	25.6124	25.0493	25.1996	24.9866	25.2059	25.3902	25.6124	25.0493	25.1996	24.9866	25.2059	25.3902	4	8.1	70.051	0	10.771	9
LOC_Os06g06350.2	B9FRL4	AMP-binding enzyme	NaN	NaN	NaN	24.3408	24.3851	24.2825	24.2952	23.1498	23.8993	24.3408	24.3851	24.2825	2	6.5	51.634	0	4.2035	3
LOC_Os06g07090.2	Q5WAB3	AP-1 complex subunit gamma-1	26.5283	26.5202	26.5464	26.5737	26.7923	26.4146	26.5283	26.5202	26.5464	26.5737	26.7923	26.4146	4	10.5	95.11	0	15.28	17
LOC_Os06g07978.1	P0DKK4	peptidase	NaN	NaN	NaN	26.0493	25.9534	26.0385	23.8044	23.1079	23.8934	26.0493	25.9534	26.0385	2	10	27.044	0	6.8685	3
LOC_Os06g07160.1	Q5VRG1	expressed protein	26.5033	26.1956	26.0914	27.0142	26.9022	26.9367	26.5033	26.1956	26.0914	27.0142	26.9022	26.9367	5	19.6	37.529	0	55.454	15
LOC_Os06g07200.1	Q5VRF6	syntaxin	NaN	NaN	NaN	27.2111	27.3033	27.2891	23.6628	21.7577	23.3855	27.2111	27.3033	27.2891	5	16.7	34.648	0	20.741	11
LOC_Os06g07600.1	B9FRS2	uncharacterized glycosyltransferase	25.1958	25.289	25.1841	26.1905	26.3882	26.6501	25.1958	25.289	25.1841	26.1905	26.3882	26.6501	5	9.3	89.656	0	13.309	12
LOC_Os06g07780.2	Q9LWK1	vesicle-associated membrane protein	26.3813	26.3766	26.3389	26.9392	27.016	27.2148	26.3813	26.3766	26.3389	26.9392	27.016	27.2148	6	37.1	22.313	0	53.549	29
LOC_Os06g07969.1	Q9LDS7	cytochrome b-c1 complex subunit 8	28.5977	NaN	28.7713	29.4279	29.217	29.4941	28.5977	24.0326	28.7713	29.4279	29.217	29.4941	1	16.7	8.4158	0	11.484	8
LOC_Os06g08670.1	B7FAE9	glutathione peroxidase	28.2261	28.4612	28.3678	28.2325	28.1878	28.2518	28.2261	28.4612	28.3678	28.2325	28.1878	28.2518	5	20.1	25.072	0	13.728	21
LOC_Os06g08720.2	Q5SMV5	OsSCP32 - Putative Serine Carboxypeptidase homologue	24.77	24.6246	24.7122	26.3172	26.1824	26.1913	24.77	24.6246	24.7122	26.3172	26.1824	26.1913	3	7.6	53.393	0	24.75	12
LOC_Os06g08770.1	Q5SMU8	ruvB-like 2	27.8334	27.6551	28.3007	27.7201	27.4551	26.9538	27.8334	27.6551	28.3007	27.7201	27.4551	26.9538	10	26.7	51.843	0	35.877	30
LOC_Os06g08840.8	B9FRX1	RNA recognition motif containing protein	27.3142	27.6641	27.6529	27.5601	27.4619	NaN	27.3142	27.6641	27.6529	27.5601	27.4619	23.7739	3	16.8	20.377	0	12.163	15
LOC_Os06g09180.1	Q69TJ8	OsMKK5 - putative MAPKK based on amino acid sequence homology	26.5978	26.7802	26.5754	25.9061	26.3169	26.533	26.5978	26.7802	26.5754	25.9061	26.3169	26.533	3	21.1	37.104	0	10.679	12
LOC_Os06g09450.7	I3QD82	sucrose synthase	28.4184	28.4363	28.4855	29.7696	29.6935	29.5505	28.4184	28.4363	28.4855	29.7696	29.6935	29.5505	18	41.2	92.128	0	66.93	70
LOC_Os06g09610.2	P0C5D5	peroxiredoxin	31.3951	31.3559	31.3378	30.1915	29.9582	29.4674	31.3951	31.3559	31.3378	30.1915	29.9582	29.4674	11	39.2	23.737	0	116.49	58
LOC_Os06g09630.1	Q69YA2	3-oxoacyl-synthase	28.7026	28.4581	28.5667	30.0072	29.971	29.9435	28.7026	28.4581	28.5667	30.0072	29.971	29.9435	5	28.8	49.049	0	96.271	34
LOC_Os06g09688.1	Q69K73	chaperonin	27.0544	26.8957	27.0292	27.9993	27.8644	27.9755	27.0544	26.8957	27.0292	27.9993	27.8644	27.9755	5	33.3	23.102	0	53.788	17
LOC_Os06g10760.1	Q69TX8	emp24/gp25L/p24 family protein	25.6873	25.7908	25.621	26.9094	26.6964	26.687	25.6873	25.7908	25.621	26.9094	26.6964	26.687	3	10.5	22.874	0	4.7413	6
LOC_Os06g10810.1	Q69TX3	phosphate carrier protein	29.8443	29.9531	29.7806	30.0642	30.0053	29.9581	29.8443	29.9531	29.7806	30.0642	30.0053	29.9581	3	23.4	38.745	0	28.41	37
LOC_Os06g10890.2	Q69TW4	sterol carrier protein-2	25.8764	25.738	25.6664	NaN	NaN	NaN	25.8764	25.738	25.6664	24.4597	23.1431	24.5781	2	18.8	10.539	0	9.469	5
LOC_Os06g11135.1	Q69Y17	gibberellin receptor GID1L2	25.4238	NaN	25.5317	26.2179	26.2745	26.2852	25.4238	23.8061	25.5317	26.2179	26.2745	26.2852	4	19.4	34.276	0	14.492	13
LOC_Os06g11140.1	Q69Y16	pyridine nucleotide-disulphide oxidoreductase domain containing protein	27.7717	27.9107	27.4024	26.1761	26.1844	26.4542	27.7717	27.9107	27.4024	26.1761	26.1844	26.4542	6	15.5	59.68	0	29.523	17
LOC_Os06g11380.1	B9FS74	geminivirus Rep-interacting motor protein	27.7742	28.0374	28.2537	27.5691	27.4207	27.6919	27.7742	28.0374	28.2537	27.5691	27.4207	27.6919	7	17.5	61.283	0	19.599	19
LOC_Os06g11800.1	Q67VZ1	annexin	NaN	NaN	NaN	24.4796	24.4535	24.7837	22.9286	22.5477	23.3058	24.4796	24.4535	24.7837	2	8.5	35.72	0	7.0495	3
LOC_Os06g11990.1	B9FS99	expressed protein	26.681	27.039	26.467	25.2263	NaN	NaN	26.681	27.039	26.467	25.2263	23.8923	24.2329	7	10.3	121.34	0	20.778	11
LOC_Os06g12600.1	B9FSC3	kinase	26.6334	26.5621	26.577	25.9261	26.2795	26.2769	26.6334	26.5621	26.577	25.9261	26.2795	26.2769	5	21.2	42.249	0	32.535	21
LOC_Os06g13030.2	Q67VC7	OsLIM - LIM domain protein	24.9065	24.7347	24.9157	26.4322	25.5878	25.4906	24.9065	24.7347	24.9157	26.4322	25.5878	25.4906	3	4.1	113.1	0	8.5279	9
LOC_Os06g13050.1	A0A0P0WV17	peroxidase family protein	26.5475	26.6428	26.7503	26.5197	26.5993	26.5822	26.5475	26.6428	26.7503	26.5197	26.5993	26.5822	4	5.6	90.008	0	15.339	10
LOC_Os06g13650.3	Q654G0	alpha-mannosidase 2	25.8883	25.9361	25.6213	26.0172	26.2262	26.2417	25.8883	25.9361	25.6213	26.0172	26.2262	26.2417	5	5.2	133.09	0	14.084	13
LOC_Os06g13660.1	B9FSH5	alanyl-tRNA synthetase	28.0158	27.5345	27.531	27.0609	27.1633	26.9846	28.0158	27.5345	27.531	27.0609	27.1633	26.9846	10	16.5	101.42	0	32.57	29
LOC_Os06g13680.1	Q654W0	B12D protein	27.5522	27.4981	27.5625	27.4565	27.531	27.5055	27.5522	27.4981	27.5625	27.4565	27.531	27.5055	1	16.7	8.1012	0	8.5257	10
LOC_Os06g13810.1	Q654U8	pyrophosphate--fructose 6-phosphate 1-phosphotransferase subunit beta	25.1814	25.5993	25.4355	24.7046	25.5614	25.6345	25.1814	25.5993	25.4355	24.7046	25.5614	25.6345	3	7.6	61.261	0	7.8136	12
LOC_Os06g13820.2	Q654U5	dynamin	28.8391	28.8112	28.766	29.2907	29.3682	29.3005	28.8391	28.8112	28.766	29.2907	29.3682	29.3005	9	28.1	99.24	0	131.93	72
LOC_Os06g14324.2	A3BAC3	caleosin related protein	NaN	NaN	NaN	25.4051	25.5025	25.8625	24.3965	22.8033	23.3708	25.4051	25.5025	25.8625	2	11.9	21.244	0	4.3404	4
LOC_Os06g14370.2	Q652U4	caleosin related protein	26.2258	26.0222	26.2525	27.0091	27.2654	27.4281	26.2258	26.0222	26.2525	27.0091	27.2654	27.4281	5	25.6	23.636	0	13.236	18
LOC_Os06g14740.1	Q652S1	NAD binding domain of 6-phosphogluconate dehydrogenase containing protein	27.9302	28.0206	27.8638	29.0014	29.1685	29.072	27.9302	28.0206	27.8638	29.0014	29.1685	29.072	14	14.1	147.44	0	86.281	52
LOC_Os06g15360.2	Q5Z6P9	RAD23 DNA repair protein	24.9891	25.279	25.0855	25.7205	26.0062	25.4588	24.9891	25.279	25.0855	25.7205	26.0062	25.4588	5	25.7	42.989	0	47.191	14
LOC_Os06g15390.1	Q5Z6P5	acylphosphatase	NaN	NaN	NaN	25.3399	25.3655	25.3004	22.2033	25.6525	22.6181	25.3399	25.3655	25.3004	3	34.1	13.557	0	5.9327	9
LOC_Os06g15400.1	Q5Z6P4	expressed protein	33.0376	32.8067	32.8005	31.4906	31.6248	31.653	33.0376	32.8067	32.8005	31.4906	31.6248	31.653	4	20.5	16.666	0	114.71	48
LOC_Os06g15990.1	Q9FRX7	aldehyde dehydrogenase	27.4979	27.6389	27.5471	28.319	28.2207	28.1821	27.4979	27.6389	27.5471	28.319	28.2207	28.1821	10	29.9	59.306	0	32.789	26
LOC_Os06g16640.1	Q5VPU9	carboxyl-terminal peptidase	NaN	NaN	NaN	24.5038	24.6098	24.519	23.5722	22.7782	23.5917	24.5038	24.6098	24.519	2	5.4	45.088	0	4.5565	5
LOC_Os06g17840.1	Q5VMT5	expressed protein	27.2395	27.5502	27.0568	26.4824	26.5786	26.3845	27.2395	27.5502	27.0568	26.4824	26.5786	26.3845	10	8.5	174.77	0	34.542	26
LOC_Os06g18670.1	Q5VME5	anthocyanidin 3-O-glucosyltransferase	30.991	30.8504	31.1717	30.0911	29.9691	29.9531	30.991	30.8504	31.1717	30.0911	29.9691	29.9531	11	40.1	51.482	0	245.46	81
LOC_Os06g19390.1	Q5Z6I5	expressed protein	25.0119	24.9829	24.9448	25.2325	25.2732	25.3553	25.0119	24.9829	24.9448	25.2325	25.2732	25.3553	3	6.9	70.323	0	17.102	13
LOC_Os06g19640.1	Q5ZA34	39S ribosomal L46	26.528	26.7477	NaN	28.1431	28.0498	27.8791	26.528	26.7477	22.8852	28.1431	28.0498	27.8791	2	10.1	28.295	0	7.2837	8
LOC_Os06g19660.2	Q5ZA31	WD domain	27.5022	27.5192	27.5246	27.8295	27.8001	27.9679	27.5022	27.5192	27.5246	27.8295	27.8001	27.9679	7	11	129.22	0	87.472	40
LOC_Os06g20090.1	Q5Z4E0	NUP155	28.0522	28.0408	28.1181	28.8297	28.9056	28.7142	28.0522	28.0408	28.1181	28.8297	28.9056	28.7142	17	16.6	161.05	0	75.862	62
LOC_Os06g20200.1	Q5Z4C9	gibberellin receptor GID1L2	28.2758	28.2075	28.0031	29.523	29.3394	29.4626	28.2758	28.2075	28.0031	29.523	29.3394	29.4626	8	46.7	39.187	0	67.825	31
LOC_Os06g20320.1	Q5Z4M6	peptidyl-prolyl cis-trans isomerase	30.7163	30.7128	30.684	30.026	30.1146	30.2884	30.7163	30.7128	30.684	30.026	30.1146	30.2884	17	43	59.93	0	140.71	93
LOC_Os06g21530.1	Q5Z9Z5	expressed protein	27.1313	27.0478	27.0957	NaN	25.3154	25.128	27.1313	27.0478	27.0957	23.7551	25.3154	25.128	2	20.5	23.376	0	14.341	7
LOC_Os06g21590.2	Q5ZA98	chlorophyll A-B binding protein	34.9512	34.9037	34.7258	32.8237	32.5523	32.572	34.9512	34.9037	34.7258	32.8237	32.5523	32.572	9	28.6	24.915	0	172.8	148
LOC_Os06g22810.1	Q5Z755	TKL_IRAK_CrRLK1L-1.14 - The CrRLK1L-1 subfamily has homology to the CrRLK1L homolog	25.888	25.6283	25.7764	25.6186	25.6991	25.5362	25.888	25.6283	25.7764	25.6186	25.6991	25.5362	1	4.8	94.22	0	5.7949	7
LOC_Os06g22960.1	Q5Z6F0	aquaporin protein	32.5861	32.5483	32.5139	34.0745	34.0381	34.1274	32.5861	32.5483	32.5139	34.0745	34.0381	34.1274	3	14.1	25.014	0	9.4491	38
LOC_Os06g23160.1	Q5Z6D2	bacterial transferase hexapeptide domain containing protein	25.0693	24.9647	NaN	24.8675	24.6926	24.8281	25.0693	24.9647	22.6891	24.8675	24.6926	24.8281	2	4.2	48.949	0	4.2006	6
LOC_Os06g24704.1	Q69XR7	acyl-coenzyme A oxidase	NaN	NaN	NaN	26.5437	26.1238	26.1833	23.195	23.0537	21.9338	26.5437	26.1238	26.1833	4	6.6	76.278	0	14.803	5
LOC_Os06g27800.1	Q69XZ5	tm-1GCR237 protein	24.7905	25.0431	NaN	24.5993	24.9302	24.8532	24.7905	25.0431	22.0533	24.5993	24.9302	24.8532	4	8.7	79.546	0	12.049	10
LOC_Os06g28950.1	Q67VQ6	expressed protein	28.5457	28.5248	28.5098	27.3306	27.1086	27.329	28.5457	28.5248	28.5098	27.3306	27.1086	27.329	4	28	22.047	0	33.947	21
LOC_Os06g29180.1	Q0DC43	erythronate-4-phosphate dehydrogenase domain containing protein	NaN	NaN	NaN	25.8346	26.001	25.8223	23.4376	23.7956	22.6134	25.8346	26.001	25.8223	2	4	41.341	0	4.6947	7
LOC_Os06g30310.1	B9FTF7	alpha-glucan water dikinase	28.6515	28.7516	28.6559	28.6615	28.2636	28.435	28.6515	28.7516	28.6559	28.6615	28.2636	28.435	13	12.2	163.18	0	88.992	42
LOC_Os06g30750.2	Q656J2	reticulon domain containing protein	27.8248	27.4202	27.1179	28.5399	28.3667	28.2907	27.8248	27.4202	27.1179	28.5399	28.3667	28.2907	2	9.1	24.72	0	65.449	23
LOC_Os06g30901.1	A0A0P0WX54	HEAT repeat family protein	NaN	NaN	NaN	24.1253	24.2302	24.2852	23.4102	24.6572	23.8212	24.1253	24.2302	24.2852	2	1.4	120.09	0.0027556	2.1745	4
LOC_Os06g31210.1	B9FTH9	methionyl-tRNA synthetase	24.93	24.8344	25.3078	NaN	NaN	NaN	24.93	24.8344	25.3078	22.3464	23	23.0437	2	3.2	89.452	0	6.5625	7
LOC_Os06g33930.1	Q5Z6B7	Divergent PAP2 family domain containing protein	27.4695	27.097	26.9958	NaN	NaN	NaN	27.4695	27.097	26.9958	23.887	24.7785	22.6725	6	36.8	30.437	0	16.727	10
LOC_Os06g34690.1	Q5Z6U5	T-complex protein	26.5787	26.5926	26.5803	26.6901	26.7516	26.5958	26.5787	26.5926	26.5803	26.6901	26.7516	26.5958	3	10	60.898	0	12.158	15
LOC_Os06g34710.1	Q5Z6U3	expressed protein	25.6141	25.7925	25.211	25.1212	24.9653	24.484	25.6141	25.7925	25.211	25.1212	24.9653	24.484	4	4.7	107.17	0	13.989	12
LOC_Os06g34790.1	Q5Z6T5	DUF538 domain containing protein	27.0238	26.2833	26.6659	27.7332	27.8564	28.3554	27.0238	26.2833	26.6659	27.7332	27.8564	28.3554	4	37	17.622	0	10.193	12
LOC_Os06g35520.1	Q5Z7J2	peroxidase precursor	NaN	NaN	NaN	27.4798	27.4313	27.3792	23.5186	23.2756	22.942	27.4798	27.4313	27.3792	4	19.6	38.334	0	11.141	12
LOC_Os06g35540.1	Q0DBN4	aminotransferase	26.1226	25.4098	25.6559	NaN	NaN	NaN	26.1226	25.4098	25.6559	23.5207	23.7985	24.2668	2	7.8	51.32	0	4.9925	9
LOC_Os06g35814.1	P40393	ras-related protein	29.0253	29.0559	29.1426	28.3148	28.3679	28.1469	29.0253	29.0559	29.1426	28.3148	28.3679	28.1469	2	24.4	23.923	0	21.619	15
LOC_Os06g36090.2	B9FTR2	ABC-2 type transporter	25.7245	25.6865	25.6227	NaN	24.7126	24.9949	25.7245	25.6865	25.6227	24.2943	24.7126	24.9949	4	6	132.43	0	12.873	9
LOC_Os06g36700.1	Q5Z907	T-complex protein	26.6509	26.7976	26.5414	27.1489	27.3965	27.5027	26.6509	26.7976	26.5414	27.1489	27.3965	27.5027	6	10.8	59.131	0	16.794	21
LOC_Os06g37160.1	Q5Z5T2	transmembrane 9 superfamily member	26.9909	26.8044	26.824	26.7623	26.7679	26.7081	26.9909	26.8044	26.824	26.7623	26.7679	26.7081	4	6.2	73.238	0	17.515	22
LOC_Os06g37180.1	Q93W07	ATP synthase	30.1884	30.3398	30.0105	32.6271	32.6836	32.4568	30.1884	30.3398	30.0105	32.6271	32.6836	32.4568	18	61.3	54.058	0	273.32	139
LOC_Os06g37420.1	Q5Z608	histone deacetylase	26.3291	26.0556	25.9701	26.4741	26.3963	26.4812	26.3291	26.0556	25.9701	26.4741	26.3963	26.4812	6	25.6	38.74	0	14.935	20
LOC_Os06g37440.1	A3BCY2	elongation factor 1-gamma	29.1559	29.0109	29.198	28.5791	28.5584	28.4144	29.1559	29.0109	29.198	28.5791	28.5584	28.4144	6	32.7	47.39	0	40.528	47
LOC_Os06g38550.1	Q5VP89	expressed protein	26.4567	26.6081	26.7927	28.0541	28.104	28.2274	26.4567	26.6081	26.7927	28.0541	28.104	28.2274	6	12.8	74.223	0	57.423	23
LOC_Os06g39040.1	Q69X86	dehydrogenase/reductase SDR family member 12	27.2109	27.0069	27.2471	27.8114	27.5836	27.7549	27.2109	27.0069	27.2471	27.8114	27.5836	27.7549	6	32.8	34.93	0	33.434	22
LOC_Os06g39690.1	Q69VD1	SOUL heme-binding protein	28.4705	28.4134	28.453	26.568	26.6569	26.606	28.4705	28.4134	28.453	26.568	26.6569	26.606	7	20.7	42.994	0	79.946	23
LOC_Os08g15270.1	Q6Z505	ATP-dependent Clp protease proteolytic subunit	27.9319	27.799	27.5431	27.9773	28.1801	28.1165	27.9319	27.799	27.5431	27.9773	28.1801	28.1165	6	35.2	24.683	0	29.563	29
LOC_Os10g21312.1	E9KIQ6	chloroplast 30S ribosomal S18	27.8887	28.1444	28.3562	26.1933	26.1544	26.2277	27.8887	28.1444	28.3562	26.1933	26.1544	26.2277	4	19	19.656	0	43.274	15
LOC_Os10g21298.1	Q7F2L7	cytochrome b559 subunit alpha	34.9729	34.8839	35.0781	32.953	32.5704	32.6161	34.9729	34.8839	35.0781	32.953	32.5704	32.6161	6	50.6	9.4445	0	323.31	99
LOC_Os06g39740.1	A0A0K0LR54	ATP synthase subunit beta	33.3147	33.3841	33.2778	32.4468	32.5809	32.5122	33.3147	33.3841	33.2778	32.4468	32.5809	32.5122	1	73.5	54.194	0	91.537	69
LOC_Os06g39744.1	Q7F4S9	photosystem I assembly ycf4	28.6522	28.6562	28.8782	26.3711	26.4143	26.487	28.6522	28.6562	28.8782	26.3711	26.4143	26.487	3	14.1	21.602	0	31.941	12
LOC_Os06g40060.1	A3BDC6	glycosyltransferase family protein	23.8865	23.7875	23.7215	25.7023	26.298	24.9503	23.8865	23.7875	23.7215	25.7023	26.298	24.9503	3	10.4	49.252	0	7.7583	5
LOC_Os06g40170.1	Q69X22	phospholipase D	25.3193	25.0403	25.1687	28.1343	28.045	28.1123	25.3193	25.0403	25.1687	28.1343	28.045	28.1123	5	12.1	92.513	0	23.378	17
LOC_Os06g40190.1	P93844	phospholipase D	27.7259	27.6943	27.9588	28.5911	28.4366	28.5647	27.7259	27.6943	27.9588	28.5911	28.4366	28.5647	8	16.6	91.318	0	23.248	27
LOC_Os06g40200.2	Q69X19	calcium-binding mitochondrial carrier CBG00135	23.5572	24.4454	24.3699	25.0881	24.7986	25.045	23.5572	24.4454	24.3699	25.0881	24.7986	25.045	2	6	56.433	0.00029507	2.7042	4
LOC_Os06g40500.1	Q69Q38	expressed protein	24.6695	25.0548	25.0466	NaN	NaN	NaN	24.6695	25.0548	25.0466	24.0015	23.1468	21.5032	2	8.8	31.488	0	14.525	4
LOC_Os06g40600.1	Q69V60	elongation factor	27.7307	27.8328	27.7942	28.2407	28.0842	28.2693	27.7307	27.8328	27.7942	28.2407	28.0842	28.2693	11	17.1	110.5	0	39.193	47
LOC_Os06g40620.2	Q69V59	SNF7 domain containing protein	NaN	NaN	NaN	24.9889	24.7617	24.86	22.2703	23.3738	23.6286	24.9889	24.7617	24.86	2	12.7	24.227	0	10.322	6
LOC_Os06g40640.3	Q69V57	fructose-bisphospate aldolase isozyme	30.1308	30.1923	30.1948	30.8642	30.786	30.8274	30.1308	30.1923	30.1948	30.8642	30.786	30.8274	9	37.4	37.754	0	134.08	65
LOC_Os06g40650.4	Q69V55	copine-1	NaN	24.7028	NaN	27.0893	27.1034	27.5395	23.2551	24.7028	23.1158	27.0893	27.1034	27.5395	4	11.1	46.247	0	23.462	8
LOC_Os06g40818.1	Q69XG4	aspartic proteinase	27.2028	26.9533	26.7552	27.8256	27.6638	27.9626	27.2028	26.9533	26.7552	27.8256	27.6638	27.9626	5	15.2	53.043	0	36.874	20
LOC_Os06g40940.1	Q69X42	glycine dehydrogenase	27.9494	27.8964	27.8098	27.9285	27.7025	27.8586	27.9494	27.8964	27.8098	27.9285	27.7025	27.8586	4	23.5	111.47	0	91.292	41
LOC_Os06g41990.2	Q69TY5	M16 domain containing zinc peptidase	28.1985	28.3879	28.3896	28.0363	28.0722	28.1154	28.1985	28.3879	28.3896	28.0363	28.0722	28.1154	11	15.7	138.68	0	114.24	30
LOC_Os06g43270.1	Q67WD3	kinase domain containing protein	26.7385	26.8223	26.6063	26.5904	26.5732	26.5538	26.7385	26.8223	26.6063	26.5904	26.5732	26.5538	8	16.8	70.962	0	26.346	27
LOC_Os06g43430.1	Q67WG3	cytochrome P450	NaN	24.7806	25.0192	24.4093	24.8458	24.2905	24.5771	24.7806	25.0192	24.4093	24.8458	24.2905	2	9.2	58.125	0	8.7632	12
LOC_Os06g43640.2	Q67WU6	Ser/Thr phosphatase family protein	NaN	NaN	NaN	25.1831	25.3187	24.9791	23.4594	22.4386	24.2697	25.1831	25.3187	24.9791	2	6.7	55.155	0	3.8988	5
LOC_Os06g43650.2	Q67WN6	secreted salivary protein	27.4716	27.1202	27.496	27.8474	27.9151	28.2201	27.4716	27.1202	27.496	27.8474	27.9151	28.2201	3	20.5	22.344	0	17.755	14
LOC_Os06g43660.1	Q67WN5	inorganic H+ pyrophosphatase	31.8825	31.9427	31.8857	32.9584	33.0484	32.9729	31.8825	31.9427	31.8857	32.9584	33.0484	32.9729	3	18.9	81.762	0	99.482	82
LOC_Os06g43760.1	B9FQ68	tRNA synthetase class I	25.2847	25.2048	25.3711	25.6268	NaN	NaN	25.2847	25.2048	25.3711	25.6268	24.4193	23.5535	3	3	131.01	0	9.6561	6
LOC_Os06g43850.1	Q67W57	ATP synthase F1	30.8019	30.8791	30.9681	30.9861	30.9138	30.9747	30.8019	30.8791	30.9681	30.9861	30.9138	30.9747	14	56.4	25.065	0	99.446	99
LOC_Os09g25320.1	P0C030	ubiquitin family protein	29.9424	30.2279	30.1336	31.6806	31.6866	31.7259	29.9424	30.2279	30.1336	31.6806	31.6866	31.7259	1	31.4	17.129	0	62.423	64
LOC_Os06g44150.1	Q67UQ7	CorA-like magnesium transporter protein	25.0142	24.5532	24.7814	25.0791	NaN	NaN	25.0142	24.5532	24.7814	25.0791	23.7585	22.9004	2	6	48.472	0	4.7601	6
LOC_Os06g44374.1	Q67WC8	transport SEC61 subunit gamma	25.2411	25.2867	25.0011	26.2678	25.4569	26.1859	25.2411	25.2867	25.0011	26.2678	25.4569	26.1859	2	23.2	7.7091	0	6.7853	10
LOC_Os06g44460.1	A3BE72	D-3-phosphoglycerate dehydrogenase	26.6524	26.8557	26.6346	26.6857	26.7566	26.8313	26.6524	26.8557	26.6346	26.6857	26.7566	26.8313	5	11.1	64.395	0	18.883	15
LOC_Os06g45120.1	Q651T8	ATP synthase	31.07	31.0293	31.0078	33.6113	33.5117	33.5417	31.07	31.0293	31.0078	33.6113	33.5117	33.5417	14	64.5	68.468	0	323.31	195
LOC_Os06g45340.2	Q653Z1	peptidyl-prolyl cis-trans isomerase	25.2513	25.2478	25.311	25.3775	25.5516	25.5371	25.2513	25.2478	25.311	25.3775	25.5516	25.5371	3	19.9	17.481	0	7.0611	9
LOC_Os06g45370.1	Q655Y9	fructose-1	24.0599	23.9488	23.9089	NaN	NaN	24.0803	24.0599	23.9488	23.9089	24.5681	23.8984	24.0803	2	8.5	43.24	0	3.291	5
LOC_Os06g45820.1	Q655S1	OsFtsH2 FtsH protease	34.3633	34.2415	34.2766	33.3705	33.4436	33.3141	34.3633	34.2415	34.2766	33.3705	33.4436	33.3141	33	62.6	72.537	0	323.31	290
LOC_Os06g45830.1	Q655R9	expressed protein	25.9642	25.9134	25.9998	26.821	26.864	26.7028	25.9642	25.9134	25.9998	26.821	26.864	26.7028	6	10.1	90.673	0	34.097	20
LOC_Os06g46284.1	Q653V7	glycosyl hydrolase	26.5284	26.4625	26.6667	27.9051	28.1479	28.1006	26.5284	26.4625	26.6667	27.9051	28.1479	28.1006	3	11.9	96.334	0	44.337	34
LOC_Os06g46435.1	Q653U0	NADPH-dependent oxidoreductase	27.189	26.7227	27.0658	24.5717	24.58	25.1682	27.189	26.7227	27.0658	24.5717	24.58	25.1682	4	10	56.543	0	9.4211	7
LOC_Os10g21406.1	E9KIT0	photosystem I iron-sulfur center	32.0848	31.9562	32.8702	32.1804	31.8414	31.7401	32.0848	31.9562	32.8702	32.1804	31.8414	31.7401	3	46.9	8.8993	0	12.696	16
LOC_Os06g46740.1	Q653Y0	early nodulin 20 precursor	NaN	NaN	NaN	26.3727	26.0869	26.0407	23.2372	23.8903	23.3057	26.3727	26.0869	26.0407	2	10.8	27.35	0	13.847	7
LOC_Os06g46930.1	Q653V9	ribosomal L24	28.2939	28.3809	28.3927	28.4218	28.4357	28.4273	28.2939	28.3809	28.3927	28.4218	28.4357	28.4273	2	12.6	20.796	0	36.391	10
LOC_Os06g47000.3	Q655G1	external NADH-ubiquinone oxidoreductase 1	27.0754	27.1829	27.2867	28.4186	28.5025	28.5216	27.0754	27.1829	27.2867	28.4186	28.5025	28.5216	8	18.7	52.871	0	46.492	29
LOC_Os06g47320.1	Q653F6	T-complex protein	27.2007	27.3763	27.4089	27.7912	27.7556	27.7281	27.2007	27.3763	27.4089	27.7912	27.7556	27.7281	10	21.8	60.264	0	28.84	29
LOC_Os06g47330.1	Q653F5	dynamin family protein	26.7909	26.8336	26.6273	27.3703	27.2989	27.0885	26.7909	26.8336	26.6273	27.3703	27.2989	27.0885	6	15.8	61.075	0	17.248	15
LOC_Os06g47550.4	Q654Y9	cadmium/zinc-transporting ATPase	28.3681	28.1917	28.1806	26.2099	25.4625	25.8079	28.3681	28.1917	28.1806	26.2099	25.4625	25.8079	4	10.3	74.609	0	55.329	14
LOC_Os09g15775.1	Q6K2P9	expressed protein;LOC_Os09g15770.1 LOC_Os09g15770.1	25.1404	25.2413	24.9691	24.3465	23.9215	NaN	25.1404	25.2413	24.9691	24.3465	23.9215	23.9964	4	8.2	48.924	0	9.9132	13
LOC_Os06g48530.1	Q5Z4U6	ZOS6-09 - C2H2 zinc finger protein	25.8242	25.7347	25.6143	25.4213	25.5665	25.7563	25.8242	25.7347	25.6143	25.4213	25.5665	25.7563	6	13.1	79.91	0	33.869	18
LOC_Os06g48640.2	B9FQQ6	proteasome/cyclosome repeat containing protein	25.0577	25.0189	25.1815	NaN	NaN	NaN	25.0577	25.0189	25.1815	23.8277	22.4433	23.579	2	12.2	95.964	0	5.8563	5
LOC_Os06g48750.2	P35683	DEAD-box ATP-dependent RNA helicase	32.4753	32.3921	32.5328	32.6224	32.9271	32.8299	32.4753	32.3921	32.5328	32.6224	32.9271	32.8299	4	54.1	47.087	0	281.53	180
LOC_Os06g48770.2	B9FQR1	OsSBeL1 - Putative Serine Beta-Lactamase homologue	24.9685	24.8924	25.0252	25.5937	25.6085	26.1355	24.9685	24.8924	25.0252	25.5937	25.6085	26.1355	4	5.7	101.03	0	6.7489	6
LOC_Os06g49120.1	Q5Z8V8	Complex I intermediate-associated 30 domain containing protein	28.016	27.8134	27.711	28.286	28.3129	28.1003	28.016	27.8134	27.711	28.286	28.3129	28.1003	9	21.1	69.803	0	75.957	32
LOC_Os06g49160.1	Q5Z8V3	thylakoid lumenal 16.5 kDa protein	30.4045	30.3505	30.2069	29.3349	29.1164	29.2048	30.4045	30.3505	30.2069	29.3349	29.1164	29.2048	4	36	24.842	0	63.309	43
LOC_Os06g49480.2	Q5Z9H9	peptidyl-prolyl cis-trans isomerase	26.3058	26.0991	26.2554	26.6133	26.5853	26.5264	26.3058	26.0991	26.2554	26.6133	26.5853	26.5264	4	22.7	23.492	0	6.1333	15
LOC_Os06g49505.1	Q5Z9H5	arogenate dehydrogenase 1	24.1377	24.1862	24.179	NaN	NaN	22.1305	24.1377	24.1862	24.179	25.2663	23.5936	22.1305	2	8.2	39.324	0	4.5166	10
LOC_Os06g49780.1	Q5Z802	expressed protein	NaN	24.1433	NaN	24.4207	24.5652	24.4404	24.0249	24.1433	23.9402	24.4207	24.5652	24.4404	2	14.9	25.845	0	4.508	3
LOC_Os06g49800.1	Q5Z800	ubiquitin interaction motif family protein	NaN	NaN	NaN	24.9015	25.3853	24.998	23.5675	23.6328	22.9628	24.9015	25.3853	24.998	3	6.7	80.067	0	4.2564	6
LOC_Os06g49890.1	Q5Z5X5	coiled-coil domain-containing 90A	25.3606	25.3939	25.4075	24.78	24.6587	24.5904	25.3606	25.3939	25.4075	24.78	24.6587	24.5904	2	8.1	25.068	0	3.6655	9
LOC_Os06g50000.1	Q5Z7T4	LYR motif containing protein	29.5067	29.6733	29.4858	30.4235	30.6419	30.5279	29.5067	29.6733	29.4858	30.4235	30.6419	30.5279	10	76.1	13.186	0	82.946	50
LOC_Os06g50030.1	Q5Z7T2	CAMK_CAMK_like.30 - CAMK includes calcium/calmodulin depedent kinases	26.6333	26.7733	26.9272	27.2269	27.1522	27.2255	26.6333	26.7733	26.9272	27.2269	27.1522	27.2255	10	24.1	69.141	0	46.903	23
LOC_Os06g50050.2	Q5Z9Q8	AAA-type ATPase family protein	25.7348	26.4341	25.406	24.3707	24.6778	NaN	25.7348	26.4341	25.406	24.3707	24.6778	22.7281	4	19.9	40.695	0	43.661	7
LOC_Os06g50220.2	B9FQX1	expressed protein;LOC_Os06g50220.1 LOC_Os06g50220.1	NaN	24.6688	24.5887	25.2019	25.2234	25.6962	23.4583	24.6688	24.5887	25.2019	25.2234	25.6962	3	5.9	66.821	0	5.3964	4
LOC_Os06g50300.1	Q5Z9N8	heat shock protein	29.9824	30.2666	30.3195	30.8042	30.8761	30.9701	29.9824	30.2666	30.3195	30.8042	30.8761	30.9701	24	35.1	93.044	0	199.27	94
LOC_Os06g50818.1	Q5YM05	expressed protein;LOC_Os06g50742.1 LOC_Os06g50742.1	26.3994	26.1469	26.3504	27.2162	27.1067	27.2466	26.3994	26.1469	26.3504	27.2162	27.1067	27.2466	5	16.2	53.676	0	10.823	12
LOC_Os06g51029.1	Q5Z974	OsFtsH1 FtsH protease	34.1775	34.2331	34.0982	32.8659	32.8512	32.8834	34.1775	34.2331	34.0982	32.8659	32.8512	32.8834	28	45.6	72.702	0	323.31	337
LOC_Os06g51150.2	Q0D9C4	catalase isozyme B	27.0547	NaN	NaN	27.2712	27.6504	27.2795	27.0547	24.514	23.5888	27.2712	27.6504	27.2795	6	27.6	54.745	0	9.8324	13
LOC_Os06g51290.3	Q5Z5B7	phytoene synthase	28.1563	28.271	27.7555	NaN	NaN	NaN	28.1563	28.271	27.7555	23.8564	25.4975	23.9176	3	11.4	47.582	0	4.5058	4
LOC_Os06g51510.1	Q5Z402	expressed protein;LOC_Os06g51510.2 LOC_Os06g51510.2	NaN	NaN	NaN	26.017	25.8849	25.7218	24.6358	23.7782	23.9053	26.017	25.8849	25.7218	2	13.1	31.29	0	10.221	13
LOC_Os07g01020.1	Q69LA6	SOR/SNZ family protein	27.1392	27.1103	27.2882	27.5713	27.5553	27.3324	27.1392	27.1103	27.2882	27.5713	27.5553	27.3324	3	11.9	33.736	0	9.607	15
LOC_Os07g01030.1	Q69LA5	glycosyl transferase	25.9637	26.1892	26.4258	26.1317	26.2734	26.2394	25.9637	26.1892	26.4258	26.1317	26.2734	26.2394	4	12.9	53.91	0	7.9054	15
LOC_Os07g01480.2	Q8L472	oxygen evolving enhancer 3 domain containing protein	30.1955	30.417	30.1894	28.8845	28.8425	28.6623	30.1955	30.417	30.1894	28.8845	28.8425	28.6623	8	44.6	24.228	0	89.17	38
LOC_Os07g01560.1	Q7EZD7	transporter family protein	NaN	NaN	NaN	27.8131	27.8857	27.7478	22.6438	24.8242	24.4514	27.8131	27.8857	27.7478	3	6	56.764	0	34.677	10
LOC_Os07g01760.1	Q69UU3	aminotransferase	30.4241	30.4278	30.4578	31.3609	31.4745	31.4466	30.4241	30.4278	30.4578	31.3609	31.4745	31.4466	17	46.4	53.655	0	132.63	117
LOC_Os07g01870.1	Q7F225	ribosomal L13	26.7624	26.9834	26.7838	27.001	27.0038	27.0519	26.7624	26.9834	26.7838	27.001	27.0038	27.0519	2	14.6	23.672	0	3.6849	4
LOC_Os07g02350.1	Q8H386	casein kinase II subunit alpha-2	25.9527	25.7719	26.2052	26.4987	26.3448	26.8863	25.9527	25.7719	26.2052	26.4987	26.3448	26.8863	4	17.4	39.342	0	10.927	13
LOC_Os07g03160.1	A0A0P0X1Z2	WD domain	26.7199	26.6387	26.6202	26.799	27.0792	27.1194	26.7199	26.6387	26.6202	26.799	27.0792	27.1194	7	15.5	82.736	0	29.369	26
LOC_Os07g03230.2	Q84LG6	eukaryotic translation initiation factor 3 subunit C	28.5006	28.3002	28.3724	28.9209	28.9369	28.8732	28.5006	28.3002	28.3724	28.9209	28.9369	28.8732	12	13.7	106.16	0	121.05	37
LOC_Os07g04240.1	Q6ZDY8	succinate dehydrogenase flavosubunit	25.7505	25.7673	25.5969	27.8908	27.8586	27.7465	25.7505	25.7673	25.5969	27.8908	27.8586	27.7465	4	8.3	68.853	0	132.75	13
LOC_Os07g04840.1	Q8GTK4	PsbP	34.8436	34.8627	34.7796	34.2184	34.3109	34.4136	34.8436	34.8627	34.7796	34.2184	34.3109	34.4136	16	61.8	26.939	0	323.31	512
LOC_Os07g04910.1	Q8H4K6	reticulon domain containing protein	26.8135	26.9834	27.5742	27.151	27.7206	26.7849	26.8135	26.9834	27.5742	27.151	27.7206	26.7849	5	30.9	26.978	0	12.85	17
LOC_Os07g04990.1	Q8H4J8	oxidoreductase	29.2431	29.3592	29.3766	29.253	29.0209	29.13	29.2431	29.3592	29.3766	29.253	29.0209	29.13	4	22.1	40.553	0	59.973	21
LOC_Os07g05000.1	Q0D8N4	oxidoreductase	28.9427	28.8369	28.995	28.2197	28.3794	28.2881	28.9427	28.8369	28.995	28.2197	28.3794	28.2881	5	17.8	40.601	0	49.09	31
LOC_Os07g05360.1	Q8H4P7	photosystem II 10 kDa polypeptide	30.2441	30.371	30.5625	29.2839	29.5447	28.9951	30.2441	30.371	30.5625	29.2839	29.5447	28.9951	4	38.7	14.163	0	24.014	21
LOC_Os07g05480.2	Q84PB5	photosystem I reaction center subunit	33.1269	33.1978	33.4471	NaN	NaN	NaN	33.1269	33.1978	33.4471	24.812	22.9601	24.4899	3	55	10.268	0	22.351	10
LOC_Os07g05570.2	Q6ZLQ0	ERD4 protein	28.9612	28.9974	29.04	30.7086	30.6747	30.712	28.9612	28.9974	29.04	30.7086	30.6747	30.712	12	18.6	77.615	0	107.41	54
LOC_Os07g05820.2	Q6YT73	hydroxyacid oxidase 1	29.7619	29.5865	29.7793	30.3855	30.4306	30.3951	29.7619	29.5865	29.7793	30.3855	30.4306	30.3951	10	52.3	40.244	0	94.236	54
LOC_Os07g06840.1	Q8GSE8	gibberellin receptor GID1L2	28.021	27.7199	28.1453	28.5948	28.4054	28.4062	28.021	27.7199	28.1453	28.5948	28.4054	28.4062	8	38.1	35.062	0	47.292	39
LOC_Os07g07000.1	Q7XIE2	syntaxin	28.5308	28.4762	28.5025	29.4031	29.3737	29.4445	28.5308	28.4762	28.5025	29.4031	29.3737	29.4445	8	27.1	34.25	0	128.33	34
LOC_Os07g07220.1	C7J524	LSM domain containing protein	26.6472	26.7886	26.6875	26.163	25.895	25.5991	26.6472	26.7886	26.6875	26.163	25.895	25.5991	3	13.4	27.349	0	20.095	21
LOC_Os07g07310.1	Q69LE7	polynucleotide phosphorylase	24.912	24.874	24.6919	26.4558	26.5931	26.2468	24.912	24.874	24.6919	26.4558	26.5931	26.2468	6	9.9	97.399	0	19.089	11
LOC_Os07g07340.1	Q69LE4	glucan endo-1	26.8398	26.8002	27.0214	28.3186	28.1323	28.2695	26.8398	26.8002	27.0214	28.3186	28.1323	28.2695	6	18.6	51.314	0	28.624	28
LOC_Os07g07410.2	Q69LD9	oxidoreductase	25.1348	NaN	NaN	28.4289	28.4957	28.5019	25.1348	23.1105	24.592	28.4289	28.4957	28.5019	4	15.9	37.586	0	32.653	11
LOC_Os07g07470.1	Q69LD2	transketolase	NaN	NaN	NaN	25.4276	25.2795	25.4462	23.1	24.1842	24.0187	25.4276	25.2795	25.4462	2	10.3	39.726	0	7.0489	5
LOC_Os07g07540.1	Q69LC0	SHOOT1 protein	31.5558	31.4596	31.3968	30.3484	30.3848	30.469	31.5558	31.4596	31.3968	30.3484	30.3848	30.469	15	39.1	37.51	0	124.42	78
LOC_Os07g08030.1	Q6ZEZ2	ribose-5-phosphate isomerase A	28.7462	28.8097	28.8962	28.0263	28.2112	28.0818	28.7462	28.8097	28.8962	28.0263	28.2112	28.0818	7	33.9	29.197	0	32.919	25
LOC_Os07g08330.1	Q6ZLB8	ribosomal L4	30.9304	30.8206	30.7328	30.9519	31.0324	30.9635	30.9304	30.8206	30.7328	30.9519	31.0324	30.9635	7	34.6	44.738	0	124.16	71
LOC_Os07g08430.1	Q6ZL61	indole-3-glycerol phosphate lyase	26.1389	25.7652	25.7414	25.8262	25.8471	25.9013	26.1389	25.7652	25.7414	25.8262	25.8471	25.9013	3	16.1	33.915	0	41.962	9
LOC_Os07g08770.1	Q6ZLG2	YGGT family protein	28.328	28.3693	28.465	28.0754	28.5874	27.6755	28.328	28.3693	28.465	28.0754	28.5874	27.6755	2	19.4	19.057	0	13.807	9
LOC_Os07g08840.1	Q0D840	thioredoxin	26.8086	27.1737	26.7236	27.8462	27.8308	27.7624	26.8086	27.1737	26.7236	27.8462	27.8308	27.7624	2	18.9	13.156	0	5.838	11
LOC_Os07g08960.1	Q7XI13	RNA recognition motif containing protein	26.2409	26.0778	26.0772	27.1245	27.0799	27.1657	26.2409	26.0778	26.0772	27.1245	27.0799	27.1657	3	14.6	33.25	0	16.669	11
LOC_Os07g08970.1	A0A0P0X317	uncharacterized ycf45	24.3161	24.3224	NaN	26.5064	26.4015	25.7169	24.3161	24.3224	23.924	26.5064	26.4015	25.7169	5	12.3	75.989	0	14.344	9
LOC_Os07g09000.1	Q6Z4F3	WD domain	27.2792	27.5485	27.3359	27.8305	27.6893	27.905	27.2792	27.5485	27.3359	27.8305	27.6893	27.905	5	17.1	42.948	0	32.038	15
LOC_Os07g09040.1	C7J529	peptidyl-prolyl cis-trans isomerase	30.2629	30.2231	30.1756	30.077	30.1226	30.1513	30.2629	30.2231	30.1756	30.077	30.1226	30.1513	7	13.8	60.067	0	47.419	39
LOC_Os07g09060.1	Q6Z4E4	aldehyde dehydrogenase	26.0253	26.0999	26.0672	26.9775	27.1689	27.0661	26.0253	26.0999	26.0672	26.9775	27.1689	27.0661	4	9	57.246	0	36.234	15
LOC_Os07g09340.1	Q8L6I2	plasma membrane ATPase	31.1242	31.2991	31.0977	31.6746	31.6191	31.734	31.1242	31.2991	31.0977	31.6746	31.6191	31.734	19	41.9	105.44	0	208.92	106
LOC_Os07g09680.1	Q6ZKZ4	ras-related protein	26.2332	26.1991	26.1321	26.706	26.8223	26.7235	26.2332	26.1991	26.1321	26.706	26.8223	26.7235	2	20	24.041	0	9.5181	14
LOC_Os07g09720.1	Q6ZDQ1	phosphoacetylglucosamine mutase	NaN	NaN	NaN	24.8493	25.1148	24.8833	24.5351	24.0119	22.0331	24.8493	25.1148	24.8833	3	6.9	60.344	0	6.8902	10
LOC_Os07g09800.1	Q6ZDP0	expressed protein	31.2348	30.4441	30.8032	27.9783	28.1827	28.3506	31.2348	30.4441	30.8032	27.9783	28.1827	28.3506	7	31	25.961	0	108.8	34
LOC_Os07g10110.1	Q6Z371	expressed protein	23.5609	23.51	23.2621	NaN	NaN	NaN	23.5609	23.51	23.2621	23.3628	23.6986	23.0926	2	7.6	85.769	0	5.2574	4
LOC_Os07g10150.1	Q6Z382	coatomer subunit gamma-2	29.4909	29.448	29.4407	29.795	29.8014	29.6524	29.4909	29.448	29.4407	29.795	29.8014	29.6524	12	26.7	98.553	0	78.433	56
LOC_Os07g10250.1	Q6Z4K6	DEAD-box ATP-dependent RNA helicase 52B	29.1854	29.2334	29.2825	29.4777	29.392	29.5479	29.1854	29.2334	29.2825	29.4777	29.392	29.5479	6	36.2	67.171	0	103.94	63
LOC_Os07g10420.2	Q7XB67	expressed protein;LOC_Os07g10420.1 LOC_Os07g10420.1	NaN	NaN	NaN	26.4262	26.3412	26.5183	22.7411	23.3661	23.0558	26.4262	26.3412	26.5183	2	12.1	23.89	0	4.5983	4
LOC_Os07g10490.1	Q0D7W4	zeta-carotene desaturase	30.273	30.374	30.2518	29.8437	29.6872	29.7382	30.273	30.374	30.2518	29.8437	29.6872	29.7382	16	35.5	63.728	0	132.66	70
LOC_Os07g10500.1	Q0D7W3	cytochrome b-c1 complex subunit 7	29.0574	29.0582	28.9954	29.5225	29.7673	29.5919	29.0574	29.0582	28.9954	29.5225	29.7673	29.5919	5	37.2	16.616	0	24.906	22
LOC_Os07g10540.2	Q6ZIY1	peptidase	NaN	24.358	NaN	24.7402	24.4081	24.4057	23.2242	24.358	23.3856	24.7402	24.4081	24.4057	2	4	57.951	0	4.5893	5
LOC_Os07g10770.1	Q84ZN6	CESA8 - cellulose synthase	25.9942	25.7634	25.4392	NaN	NaN	NaN	25.9942	25.7634	25.4392	24.7285	23.3943	23.574	3	6.1	120.79	0	16.267	8
LOC_Os07g10830.1	Q6ZLK0	dolichyl-diphosphooligosaccharide--glycosyltransferase 48 kDasubunit precursor	28.9029	28.8668	29.0949	29.1794	29.2001	29.4164	28.9029	28.8668	29.0949	29.1794	29.2001	29.4164	11	30.1	48.389	0	56.901	57
LOC_Os07g10840.1	Q6ZLJ9	uncharacterized glycosyltransferase	NaN	NaN	NaN	26.4012	26.5958	26.482	22.6679	23.0623	24.2086	26.4012	26.5958	26.482	3	8.5	81.999	0	27.07	10
LOC_Os07g11070.1	Q8H4U8	DUF630/DUF632 domains containing protein	NaN	23.3084	23.1863	24.0289	23.6021	23.7315	22.5092	23.3084	23.1863	24.0289	23.6021	23.7315	3	5.4	81.791	0	5.9235	3
LOC_Os07g11110.1	Q8GTK8	NAD dependent epimerase/dehydratase family protein	29.7371	29.6939	29.634	29.7221	29.7075	29.7774	29.7371	29.6939	29.634	29.7221	29.7075	29.7774	9	38	41.008	0	173.98	68
LOC_Os07g12110.1	Q8GVI0	eukaryotic translation initiation factor 3 subunit E	28.2819	28.4567	28.3739	27.6007	27.7168	27.4302	28.2819	28.4567	28.3739	27.6007	27.7168	27.4302	5	23.7	51.306	0	94.119	24
LOC_Os07g12530.2	B9FW92	ABC1 family domain containing protein	27.3552	27.3205	27.2725	25.9308	26.4674	26.2834	27.3552	27.3205	27.2725	25.9308	26.4674	26.2834	7	19.4	55.184	0	42.582	21
LOC_Os07g13590.1	Q7F0B4	expressed protein	27.2056	27.2976	27.1842	27.215	27.2594	27.0978	27.2056	27.2976	27.1842	27.215	27.2594	27.0978	6	21	45.744	0	55.307	13
LOC_Os07g13969.1	Q8GRK6	expressed protein	24.8794	25.1598	25.1569	25.976	25.665	26.1699	24.8794	25.1598	25.1569	25.976	25.665	26.1699	2	29.8	12.198	0	4.7088	6
LOC_Os07g14270.3	Q0D7H6	calreticulin precursor protein	27.1923	27.2421	27.3244	27.3049	27.5095	27.7338	27.1923	27.2421	27.3244	27.3049	27.5095	27.7338	5	22.4	48.308	0	11.509	14
LOC_Os07g14580.1	Q7XHS7	mRNA-decapping enzyme	24.7292	24.6385	24.7244	25.0403	24.5736	24.8814	24.7292	24.6385	24.7244	25.0403	24.5736	24.8814	1	5.2	41.362	0	9.1338	7
LOC_Os07g14700.1	Q8GRV7	harpin-induced 1 domain containing protein	NaN	NaN	NaN	25.6884	25.5109	25.3357	23.5173	23.5488	22.5137	25.6884	25.5109	25.3357	2	15.9	24.545	0	9.6415	6
LOC_Os07g14740.1	Q8H3F6	harpin-induced 1 domain containing protein	25.8164	25.5214	NaN	27.9575	27.2017	28.1056	25.8164	25.5214	23.8075	27.9575	27.2017	28.1056	3	15.5	22.792	0	12.84	5
LOC_Os07g15880.1	Q7EYR6	mitochondrial prohibitin complex 2	30.1504	29.9822	30.0351	30.8156	30.5811	30.8646	30.1504	29.9822	30.0351	30.8156	30.5811	30.8646	6	45.3	31.954	0	95.586	63
LOC_Os07g18120.1	B9FWN0	aldehyde oxidase	NaN	NaN	NaN	26.6053	26.6565	26.5988	24.6374	24.03	24.5449	26.6053	26.6565	26.5988	4	4.1	148.5	0	7.8672	7
LOC_Os07g18720.1	B9FWP5	tetratricopeptide repeat containing protein	27.5038	27.4205	27.5314	25.7786	25.8577	25.7877	27.5038	27.4205	27.5314	25.7786	25.8577	25.7877	6	13.7	53.435	0	23.434	20
LOC_Os07g19530.1	A0A0P0X4T3	peptidase	25.6715	26.2947	26.4503	27.1935	27.1438	27.2882	25.6715	26.2947	26.4503	27.1935	27.1438	27.2882	6	9.2	95.495	0	35.172	19
LOC_Os07g22600.2	Q9SMB1	spermidine synthase	24.8298	24.4089	24.4464	24.0121	23.9436	NaN	24.8298	24.4089	24.4464	24.0121	23.9436	23.2002	2	8.2	34.792	0	3.8233	4
LOC_Os07g22640.1	Q7XAL6	lipid binding protein	27.9754	28.0474	28.0641	28.6774	28.6422	28.7777	27.9754	28.0474	28.0641	28.6774	28.6422	28.7777	6	17.3	55.377	0	29.81	22
LOC_Os07g22700.2	Q69V11	tim44-like domain containing protein	26.3157	26.4364	26.3429	26.7255	26.5242	26.6285	26.3157	26.4364	26.3429	26.7255	26.5242	26.6285	6	18.3	53.495	0	28.333	18
LOC_Os07g23990.1	Q7EY18	tetratricopeptide repeat domain containing protein	28.9499	29.1693	29.1784	28.3959	28.2963	28.44	28.9499	29.1693	29.1784	28.3959	28.2963	28.44	16	14.3	206.89	0	149.32	64
LOC_Os07g24190.3	Q69V23	CESA3 - cellulose synthase	25.8216	25.9191	25.8046	NaN	NaN	NaN	25.8216	25.9191	25.8046	23.4547	23.8069	23.1893	3	5.2	109.24	0	9.9346	5
LOC_Os07g25420.1	Q8W423	26S proteasome non-ATPase regulatory subunit 8	26.9647	26.8437	26.849	26.3998	26.4336	26.6	26.9647	26.8437	26.849	26.3998	26.4336	26.6	2	9.7	30.772	0	20.359	7
LOC_Os07g25430.1	Q6Z3V7	photosystem I reaction center subunit IV A	34.1503	34.395	34.4722	33.6109	33.7644	33.8431	34.1503	34.395	34.4722	33.6109	33.7644	33.8431	7	54.4	15.546	0	323.31	118
LOC_Os07g26690.2	B7EKW3	aquaporin protein	32.6939	32.6552	32.6847	33.3934	33.3318	33.3403	32.6939	32.6552	32.6847	33.3934	33.3318	33.3403	6	27	30.093	0	165.95	113
LOC_Os07g26940.2	Q7EY59	ORM1	24.5449	NaN	24.2985	25.5275	25.5414	25.4129	24.5449	24.0347	24.2985	25.5275	25.5414	25.4129	2	26.9	13.805	0	5.587	6
LOC_Os07g28040.1	Q0D6M4	O-methyltransferase	25.6955	25.6353	25.7132	NaN	NaN	24.5815	25.6955	25.6353	25.7132	24.2385	23.6595	24.5815	4	15.8	37.881	0	10.118	5
LOC_Os07g28090.1	Q69RG8	ABC transporter	28.9359	28.9421	28.8006	29.1734	29.2987	29.0297	28.9359	28.9421	28.8006	29.1734	29.2987	29.0297	9	19.9	73.905	0	117.73	39
LOC_Os07g28400.1	Q0D6L9	CDGSH iron sulfur domain-containing 1	NaN	NaN	NaN	28.2602	28.1919	28.1827	23.5797	24.0653	23.462	28.2602	28.1919	28.1827	3	33.9	11.405	0	11.274	9
LOC_Os07g28480.1	Q69RL1	glutathione S-transferase	26.1931	25.9934	25.8382	NaN	25.6021	NaN	26.1931	25.9934	25.8382	23.2349	25.6021	23.7117	2	10.8	25.826	0	12.527	6
LOC_Os07g28610.2	Q6ZL81	expressed protein;LOC_Os07g28610.1 LOC_Os07g28610.1	31.3697	31.4714	31.3601	31.0536	31.0892	30.9442	31.3697	31.4714	31.3601	31.0536	31.0892	30.9442	4	27.3	15.729	0	24.973	31
LOC_Os07g28790.1	Q0D6K6	PAP fibrillin family domain containing protein	27.9608	28.0223	27.9662	27.864	27.8764	27.9615	27.9608	28.0223	27.9662	27.864	27.8764	27.9615	6	17.7	43.322	0	41.334	23
LOC_Os07g29410.1	Q84NN4	thioredoxin	28.149	28.2019	28.1472	26.5518	27.0254	26.7438	28.149	28.2019	28.1472	26.5518	27.0254	26.7438	8	37.5	32.155	0	79.391	23
LOC_Os07g29450.1	Q0D6I0	expressed protein	25.3505	25.4247	25.2717	25.5043	25.6247	26.7598	25.3505	25.4247	25.2717	25.5043	25.6247	26.7598	2	3.9	89.693	0	31.888	6
LOC_Os07g29620.1	Q0D6H5	OsSCP39 - Putative Serine Carboxypeptidase homologue	NaN	NaN	NaN	28.5725	28.4624	28.3775	22.9702	22.6288	23.3453	28.5725	28.4624	28.3775	4	13.4	57.351	0	15.052	12
LOC_Os07g30020.1	Q8H2Q5	anthranilate phosphoribosyltransferase	27.6235	27.6157	27.7193	28.3007	28.3116	28.2587	27.6235	27.6157	27.7193	28.3007	28.3116	28.2587	11	17.1	116.38	0	46.181	46
LOC_Os07g30300.1	Q84ZE8	small G family protein	NaN	NaN	NaN	26.7712	26.5127	26.5241	23.1788	24.3658	22.5207	26.7712	26.5127	26.5241	3	10.6	40.755	0	9.4349	8
LOC_Os07g30670.1	Q7XHS1	2Fe-2S iron-sulfur cluster binding domain containing protein	29.154	29.2353	29.1218	28.5144	28.0009	28.1693	29.154	29.2353	29.1218	28.5144	28.0009	28.1693	5	37.6	22.629	0	25.713	22
LOC_Os07g30790.1	Q7XHR1	ubiquinol-cytochrome C chaperone family protein	25.4375	NaN	26.3573	25.7842	25.8928	25.8962	25.4375	23.9482	26.3573	25.7842	25.8928	25.8962	4	22.2	33.378	0	15.344	10
LOC_Os07g30800.1	Q7XHR0	immunophilin	27.0019	26.7778	26.7603	26.0345	25.9608	26.5545	27.0019	26.7778	26.7603	26.0345	25.9608	26.5545	4	25	21.058	0	23.863	17
LOC_Os07g30970.1	Q07661	nucleoside diphosphate kinase	26.5018	NaN	26.4977	27.1049	27.3002	27.2722	26.5018	22.5647	26.4977	27.1049	27.3002	27.2722	2	20.8	16.861	0	11.983	7
LOC_Os07g31300.1	Q8GTK7	ATP synthase delta chain	27.1458	27.4583	27.6418	29.6976	29.6946	29.4105	27.1458	27.4583	27.6418	29.6976	29.6946	29.4105	3	32.7	21.213	0	16.487	16
LOC_Os07g31340.3	Q0D6B1	regulator of nonsense transcripts 1	24.885	NaN	NaN	25.7293	25.6191	25.7382	24.885	22.6268	23.6239	25.7293	25.6191	25.7382	5	7.7	97.91	0	20.336	9
LOC_Os07g31370.1	Q8H4Q9	ras-related protein	29.6628	29.7763	29.5974	30.0519	30.0808	30.044	29.6628	29.7763	29.5974	30.0519	30.0808	30.044	6	32.2	22.945	0	58.425	43
LOC_Os07g31380.1	Q7F190	NAD-dependent malic enzyme	NaN	NaN	NaN	25.4924	25.5852	25.331	21.838	23.0749	23.5679	25.4924	25.5852	25.331	3	7.2	68.942	0	13.007	4
LOC_Os07g31540.1	Q69VS3	ubiquitin family protein	NaN	24.5456	NaN	25.5067	25.361	25.7776	23.3119	24.5456	23.2732	25.5067	25.361	25.7776	2	3.3	102.83	0	17.585	9
LOC_Os07g31720.1	Q69RN2	GTPase activating protein	26.2796	26.3067	26.3454	29.3633	29.5093	29.1485	26.2796	26.3067	26.3454	29.3633	29.5093	29.1485	3	38.7	18.916	0	13.868	12
LOC_Os07g31884.1	Q6Z493	MATE efflux family protein	25.9148	25.8719	25.9212	26.6796	26.5067	26.5122	25.9148	25.8719	25.9212	26.6796	26.5067	26.5122	3	5.8	61.063	0	15.529	11
LOC_Os07g32380.1	Q0D673	phosphatase 2C	NaN	NaN	NaN	27.9134	27.8478	27.9337	22.5466	23.0396	23.0068	27.9134	27.8478	27.9337	3	12.4	31.74	0	23.091	9
LOC_Os07g32450.1	Q7XIR7	kinase PKN/PRK1	NaN	NaN	24.5515	26.368	25.8687	25.1589	23.7578	23.8034	24.5515	26.368	25.8687	25.1589	4	15.7	39.115	0	12.257	8
LOC_Os07g32460.1	Q8LIJ9	src homology-3 domain 3	24.801	24.8701	24.4543	26.0227	25.6038	25.649	24.801	24.8701	24.4543	26.0227	25.6038	25.649	3	11.8	38.891	0	15.624	9
LOC_Os07g32570.2	Q6Z4A7	OsAPRL1 adenosine 5-phosphosulfate reductase-like OsAPRL1	26.5849	26.7015	26.712	24.6524	24.706	24.8167	26.5849	26.7015	26.712	24.6524	24.706	24.8167	6	15.4	50.591	0	14.076	14
LOC_Os07g32630.1	Q6Z4B7	UDP-glucoronosyl and UDP-glucosyl transferase domain containing protein	25.4887	25.742	25.8587	26.4726	26.3921	26.4829	25.4887	25.742	25.8587	26.4726	26.3921	26.4829	4	14.2	52.138	0	19.066	16
LOC_Os07g32880.1	Q84NW1	ATP synthase gamma chain	34.5487	34.5517	34.5918	32.7822	32.875	32.6809	34.5487	34.5517	34.5918	32.7822	32.875	32.6809	18	49.4	39.706	0	323.31	265
LOC_Os07g33110.4	P53683	CAMK_CAMK_like.33 - CAMK includes calcium/calmodulin depedent kinases	29.0702	28.9078	29.2291	28.9534	28.8262	28.8748	29.0702	28.9078	29.2291	28.9534	28.8262	28.8748	9	27.8	59.505	0	93.266	47
LOC_Os07g33780.1	B9FXK4	pleiotropic drug resistance 5	NaN	NaN	NaN	26.1592	26.0096	26.193	25.1872	24.103	24.0001	26.1592	26.0096	26.193	3	10.7	66.06	0	22.251	6
LOC_Os07g33910.2	B7EHD5	transporter family protein	NaN	NaN	24.675	24.633	24.7876	24.774	22.7473	23.2897	24.675	24.633	24.7876	24.774	2	8.8	29.882	0	3.5179	6
LOC_Os07g34520.3	A0A0A0QMT5	isocitrate lyase	25.6537	NaN	NaN	28.1923	29.0947	29.0044	25.6537	23.7203	24.2545	28.1923	29.0947	29.0044	7	21.1	60.576	0	46.754	21
LOC_Os07g34640.2	Q8GVP6	pyruvate Pi dikinase regulatory protein	24.8506	25.0071	25.0735	26.513	26.2626	26.5444	24.8506	25.0071	25.0735	26.513	26.2626	26.5444	4	13.3	47.838	0	9.8507	13
LOC_Os07g34730.1	Q8GVN6	acyltransferase	27.466	27.4084	28.0166	26.9873	26.8535	27.4277	27.466	27.4084	28.0166	26.9873	26.8535	27.4277	4	19.7	42.627	0	15.826	16
LOC_Os07g34950.2	Q7XIT0	uncharacterized membrane protein	25.5741	25.6403	25.7248	NaN	NaN	NaN	25.5741	25.6403	25.7248	24.1414	23.2058	23.2743	2	24	14.43	0	6.9789	7
LOC_Os07g35510.1	Q6YVU4	glucan endo-1	NaN	NaN	25.2855	26.337	26.6642	26.2963	23.8706	22.4443	25.2855	26.337	26.6642	26.2963	4	9.7	60.897	0	7.6884	6
LOC_Os07g35560.2	B9FXQ1	glucan endo-1	25.2252	25.2109	25.6371	27.094	28.5968	28.0865	25.2252	25.2109	25.6371	27.094	28.5968	28.0865	5	12.5	59.251	0	22.995	10
LOC_Os07g35580.1	Q7XHL0	TKL_IRAK_DUF26-lc.20 - DUF26 kinases have homology to DUF26 containing loci	NaN	NaN	NaN	24.8338	24.6678	24.9012	23.7397	22.4742	24.3465	24.8338	24.6678	24.9012	2	3.7	74.773	0	4.9721	4
LOC_Os07g36080.3	A3BKU8	oxygen evolving enhancer 3 domain containing protein	35.7939	36.091	35.9273	34.8339	34.6661	34.7678	35.7939	36.091	35.9273	34.8339	34.6661	34.7678	15	68.6	17.101	0	266.2	200
LOC_Os07g36190.1	Q8GVZ0	hydrolase	26.2482	25.7711	26.0788	26.2268	25.8998	NaN	26.2482	25.7711	26.0788	26.2268	25.8998	23.4795	3	20.2	27.341	0	22.833	10
LOC_Os07g36250.3	B9FXS4	peptide chain release factor protein	25.0632	25.2178	25.2877	NaN	NaN	NaN	25.0632	25.2178	25.2877	24.4371	22.5674	23.6136	4	14	42.23	0	10.304	8
LOC_Os11g24610.2	Q8GVY2	60S ribosomal L38	25.8975	25.6649	25.6549	NaN	25.515	NaN	25.8975	25.6649	25.6549	24.365	25.515	24.2302	3	36.2	8.0355	0	5.1248	7
LOC_Os07g36465.1	C7J582	vacuolar ATP synthase subunit H	28.0837	28.3295	28.3081	29.3486	29.338	29.5	28.0837	28.3295	28.3081	29.3486	29.338	29.5	6	62.2	12.82	0	107.59	29
LOC_Os07g36470.1	B9FXT4	vacuolar ATP synthase subunit H	28.7349	28.4697	28.1445	29.4765	28.9783	28.8206	28.7349	28.4697	28.1445	29.4765	28.9783	28.8206	6	25.4	35.521	0	49.605	22
LOC_Os07g36590.1	Q7EZ32	serine/threonine-kinase receptor precursor	NaN	NaN	NaN	25.6068	25.6022	25.7287	24.2192	24.2427	21.893	25.6068	25.6022	25.7287	3	4.9	94.61	0	8.9823	6
LOC_Os07g36600.3	Q84S20	universal stress domain containing protein	NaN	NaN	25.3369	25.7645	26.3438	26.3324	24.1891	22.48	25.3369	25.7645	26.3438	26.3324	2	17.2	28.186	0	13.843	8
LOC_Os07g36940.2	B9FXV5	eukaryotic translation initiation factor 4G	26.7915	26.2665	26.294	NaN	NaN	26.1356	26.7915	26.2665	26.294	23.993	24.6645	26.1356	3	3.6	193.53	0	25.868	10
LOC_Os07g37030.1	Q69S39	cytochrome b6-f complex iron-sulfur subunit	34.8623	34.8129	34.824	32.9893	33.1861	33.154	34.8623	34.8129	34.824	32.9893	33.1861	33.154	8	31.6	23.884	0	109.8	94
LOC_Os07g37240.1	Q6Z411	chlorophyll A-B binding protein	35.7726	35.6925	35.7528	34.2136	34.184	34.2923	35.7726	35.6925	35.7528	34.2136	34.184	34.2923	13	50.7	31.349	0	264.17	212
LOC_Os07g37250.1	Q84PB7	THYLAKOID FORMATION1	31.272	31.341	31.1083	31.1694	31.1765	30.9883	31.272	31.341	31.1083	31.1694	31.1765	30.9883	10	33.8	32.099	0	116.2	68
LOC_Os07g37320.1	Q6Z401	transporter family protein	NaN	NaN	NaN	26.0521	26.4788	26.3828	23.5896	23.2729	23.7007	26.0521	26.4788	26.3828	2	4.2	57.731	0	6.4886	5
LOC_Os07g37550.1	Q6ZF30	chlorophyll A-B binding protein	35.1668	35.2496	35.3625	33.3412	33.3186	33.3757	35.1668	35.2496	35.3625	33.3412	33.3186	33.3757	8	50.4	28.778	0	314.3	166
LOC_Os07g37750.1	B9FXY3	ATMIN7	28.6509	28.7985	28.7	29.1195	29.0956	29.1327	28.6509	28.7985	28.7	29.1195	29.0956	29.1327	21	19.8	185.55	0	194.25	68
LOC_Os07g37830.2	Q7XIJ9	peptidyl-prolyl cis-trans isomerase CYP37	27.433	27.4731	27.5896	27.5803	27.6929	27.5597	27.433	27.4731	27.5896	27.5803	27.6929	27.5597	7	19.2	46.09	0	19.017	33
LOC_Os07g38300.5	A3BLC3	ribosome recycling factor	27.7195	27.5973	27.7029	27.8234	27.865	27.9094	27.7195	27.5973	27.7029	27.8234	27.865	27.9094	6	58.9	15.744	0	55.718	30
LOC_Os07g38390.1	Q0D5A7	chalcone isomerase	25.5303	25.4542	25.4045	26.5772	26.6081	26.6984	25.5303	25.4542	25.4045	26.5772	26.6081	26.6984	5	21.7	28.522	0	13.244	15
LOC_Os07g38730.1	Q0PVB0	tubulin/FtsZ domain containing protein	27.8861	27.986	27.8307	27.2328	27.2009	27.3183	27.8861	27.986	27.8307	27.2328	27.2009	27.3183	3	28.9	49.654	0	49.495	13
LOC_Os07g38760.1	Q6ZL37	HEAT repeat family protein	28.1331	28.3347	28.1592	27.7706	27.7223	27.8452	28.1331	28.3347	28.1592	27.7706	27.7223	27.8452	10	15	122.79	0	48.071	45
LOC_Os07g38840.2	Q6ZLA9	expressed protein;LOC_Os07g38840.1 LOC_Os07g38840.1	NaN	NaN	NaN	27.5101	27.6127	27.5582	23.0527	23.7581	23.423	27.5101	27.6127	27.5582	5	14.9	55.851	0	12.917	14
LOC_Os07g38850.1	Q0D576	prenyltransferase	27.3302	27.3168	27.2991	26.9489	26.929	26.9679	27.3302	27.3168	27.2991	26.9489	26.929	26.9679	3	8.9	35.682	0	48.221	13
LOC_Os07g38960.2	Q6ZL95	chlorophyll A-B binding protein	33.0844	33.1961	32.7645	30.6876	30.686	30.3691	33.0844	33.1961	32.7645	30.6876	30.686	30.3691	7	44.7	28.104	0	85.48	57
LOC_Os07g39270.2	Q7XI92	polyprenyl synthetase	26.8237	27.0363	26.6543	NaN	NaN	NaN	26.8237	27.0363	26.6543	24.5639	24.0292	23.7721	3	16.4	38.654	0	19.147	7
LOC_Os07g39350.1	Q0D551	transporter family protein	NaN	NaN	NaN	25.1524	25.2654	25.0549	24.2451	24.0292	22.481	25.1524	25.2654	25.0549	2	3.3	61.178	0	5.5233	7
LOC_Os07g39470.1	Q8GVE1	gibberellin response modulator protein	24.9216	25.1283	25.1082	NaN	NaN	NaN	24.9216	25.1283	25.1082	23.7396	23.952	23.3239	3	6.6	60.107	0	6.0977	6
LOC_Os07g39620.2	Q8H5M0	C2 domain containing protein	25.0137	25.037	24.8038	25.2108	25.374	25.2266	25.0137	25.037	24.8038	25.2108	25.374	25.2266	4	18.9	46.052	0	30.659	10
LOC_Os07g39630.1	Q0D536	calcium-binding protein	25.8443	25.7892	25.7455	26.0668	26.3477	26.1176	25.8443	25.7892	25.7455	26.0668	26.3477	26.1176	3	8.9	38.794	0	22.068	15
LOC_Os07g39710.1	Q69WE3	NADH dehydrogenase iron-sulfur 4	26.9588	27.0552	NaN	27.0542	26.944	26.844	26.9588	27.0552	23.9302	27.0542	26.944	26.844	3	30.2	17.345	0	10.827	8
LOC_Os07g39870.3	Q6ZIQ1	eukaryotic peptide chain release factor subunit 1-1	26.9257	27.0136	26.7854	26.9989	27.2405	27.1291	26.9257	27.0136	26.7854	26.9989	27.2405	27.1291	6	18.8	49.09	0	23.141	22
LOC_Os07g40580.1	Q84ZK1	eukaryotic translation initiation factor 5A	26.4749	26.49	26.3989	26.8974	27.3069	27.2972	26.4749	26.49	26.3989	26.8974	27.3069	27.2972	2	21.9	17.457	0	23.37	10
LOC_Os07g40620.1	A3BLU3	saccharopine dehydrogenase	NaN	NaN	NaN	27.1235	27.0934	27.3223	24.4759	23.4797	23.4888	27.1235	27.0934	27.3223	5	19.1	48.439	0	17.624	11
LOC_Os07g40800.1	Q7XAM2	PPR repeat domain containing protein	25.4358	25.4804	25.5148	NaN	NaN	NaN	25.4358	25.4804	25.5148	24.2757	23.8299	23.2983	2	7.5	68.72	0	13.278	8
LOC_Os07g41080.1	B9FYA3	hydrolase	26.1804	25.9403	26.1032	23.2701	NaN	NaN	26.1804	25.9403	26.1032	23.2701	24.308	24.2723	2	4.4	77.276	0	3.5573	6
LOC_Os07g41710.2	Q6YSF0	expressed protein	27.5296	27.7902	27.7234	NaN	NaN	26.1617	27.5296	27.7902	27.7234	23.6308	24.5315	26.1617	3	28.6	26.622	0	25.933	15
LOC_Os07g41730.1	Q6YSE8	OsPOP16 - Putative Prolyl Oligopeptidase homologue	26.3596	26.6473	26.4425	26.6285	26.8002	26.1832	26.3596	26.6473	26.4425	26.6285	26.8002	26.1832	5	24.4	35.782	0	51.85	14
LOC_Os07g41800.3	B7E3W3	peroxisome assembly protein	NaN	NaN	NaN	24.4363	24.5492	24.6213	23.8272	23.7178	23.0345	24.4363	24.5492	24.6213	2	12.9	39.057	0	3.0551	4
LOC_Os07g42170.1	Q8GSE9	60S ribosomal protein	27.3519	27.444	26.934	26.3872	26.2806	26.0362	27.3519	27.444	26.934	26.3872	26.2806	26.0362	3	28.8	16.017	0	8.5157	15
LOC_Os07g42300.2	A3BM61	elongation factor protein	29.4068	29.5027	29.2649	29.868	29.7091	29.8922	29.4068	29.5027	29.2649	29.868	29.7091	29.8922	11	66.8	24.862	0	122.29	58
LOC_Os07g42632.3	Q7X7X0	folic acid synthesis protein	23.9879	NaN	24.483	25.632	25.9794	24.9071	23.9879	24.1642	24.483	25.632	25.9794	24.9071	3	8.4	56.784	0	9.4469	7
LOC_Os07g42810.2	Q7XI39	adaptor complexes medium subunit family domain containing protein	25.6696	25.3229	25.6829	26.962	26.8459	26.8339	25.6696	25.3229	25.6829	26.962	26.8459	26.8339	6	14.4	50.646	0	80.037	17
LOC_Os07g42890.1	A0A0P0X8Y8	GRAM domain containing protein	26.4094	26.215	26.1127	27.4788	27.5018	27.5726	26.4094	26.215	26.1127	27.4788	27.5018	27.5726	3	18.9	31.599	0	14.131	11
LOC_Os07g42940.4	B7EIN5	CAMK_CAMK_like.7 - CAMK includes calcium/calmodulin depedent kinases	NaN	NaN	NaN	25.6085	25.8348	25.6441	23.174	24.0711	24.2426	25.6085	25.8348	25.6441	3	9.5	29.669	0	8.1856	5
LOC_Os07g42950.1	Q8LH97	40S ribosomal S6	28.1992	28.0335	28.1184	28.6618	28.3407	28.4895	28.1992	28.0335	28.1184	28.6618	28.3407	28.4895	5	18	28.472	0	22.236	16
LOC_Os07g42960.1	Q0D4J5	phospho-2-dehydro-3-deoxyheptonate aldolase	28.4249	28.6425	28.2425	27.2014	27.1342	27.1809	28.4249	28.6425	28.2425	27.2014	27.1342	27.1809	9	23.6	59.078	0	44.288	26
LOC_Os07g43370.1	Q8LI32	amine oxidase family protein	30.4316	30.5154	30.4144	29.3652	29.248	29.4153	30.4316	30.5154	30.4144	29.3652	29.248	29.4153	12	40	49.657	0	63.349	50
LOC_Os07g43470.1	Q7XI68	GTP-binding protein	26.9048	26.8149	26.8119	26.5777	26.896	26.1134	26.9048	26.8149	26.8119	26.5777	26.896	26.1134	5	19.8	41.218	0	21.595	15
LOC_Os07g43560.1	Q0D4F7	TKL_IRAK_DUF26-lc.24 - DUF26 kinases have homology to DUF26 containing loci	29.7394	29.7064	29.8263	29.0031	28.8534	29.2472	29.7394	29.7064	29.8263	29.0031	28.8534	29.2472	13	26.9	73.672	0	119.18	70
LOC_Os07g43570.1	Q8GSC2	TKL_IRAK_DUF26-lc.25 - DUF26 kinases have homology to DUF26 containing loci	25.429	25.6111	24.8977	24.9457	24.6455	24.6154	25.429	25.6111	24.8977	24.9457	24.6455	24.6154	3	7	70.311	0	5.9337	6
LOC_Os07g43700.2	Q8H4E0	lactate/malate dehydrogenase	27.9494	27.8373	27.9012	27.6146	27.5709	27.6139	27.9494	27.8373	27.9012	27.6146	27.5709	27.6139	5	22.3	42.221	0	37.721	23
LOC_Os07g43890.1	Q7XI54	emp24/gp25L/p24 family protein	26.132	26.447	26.0369	27.5579	27.4093	27.6076	26.132	26.447	26.0369	27.5579	27.4093	27.6076	2	13	25.853	0	13.892	10
LOC_Os07g43900.1	B9FUE6	kinase domain containing protein	25.607	25.5965	25.6196	25.9585	25.9961	26.2853	25.607	25.5965	25.6196	25.9585	25.9961	26.2853	2	9.7	36.588	0	10.394	13
LOC_Os07g44190.1	Q8H5T5	h/ACA ribonucleocomplex subunit 4	26.723	27.523	26.9084	25.3186	25.6459	25.6046	26.723	27.523	26.9084	25.3186	25.6459	25.6046	7	20.7	65.866	0	19.398	16
LOC_Os07g44350.1	Q8H5R6	sec20 domain containing protein	26.5912	26.3018	26.2374	26.1892	26.1299	26.0088	26.5912	26.3018	26.2374	26.1892	26.1299	26.0088	3	22.2	30.061	0	23.859	9
LOC_Os07g44650.1	Q8GS72	LYR motif containing protein	28.858	29.0774	28.7537	28.8443	28.9206	28.95	28.858	29.0774	28.7537	28.8443	28.9206	28.95	7	55	14.964	0	34.992	53
LOC_Os07g44860.1	Q8H5P9	gibberellin receptor GID1L2	25.9179	25.4939	26.0667	27.6313	27.586	26.882	25.9179	25.4939	26.0667	27.6313	27.586	26.882	3	22	37.014	0	15.894	15
LOC_Os07g45064.1	B9FUI2	Phosphatidylinositol kinase and FAT containing domain protein	25.565	25.3899	25.2947	26.1101	26.4048	25.87	25.565	25.3899	25.2947	26.1101	26.4048	25.87	4	5.7	129.19	0	18.115	11
LOC_Os07g45090.1	Q8H2T7	NADH-ubiquinone oxidoreductase 51 kDa subunit	29.7348	29.8919	29.8967	29.9356	29.8139	30.0672	29.7348	29.8919	29.8967	29.9356	29.8139	30.0672	15	36.5	55.26	0	54.709	64
LOC_Os07g45320.1	Q7XIQ1	COX VIIa	28.4172	28.5797	28.6292	29.815	29.8324	29.8856	28.4172	28.5797	28.6292	29.815	29.8324	29.8856	1	26.9	7.6208	0	4.5667	9
LOC_Os07g45570.1	Q8H493	expressed protein	NaN	25.2458	NaN	26.1239	26.1951	26.553	23.7021	25.2458	24.7783	26.1239	26.1951	26.553	2	4	107.92	0	26.15	8
LOC_Os07g46370.1	Q0D3Z9	WD domain	29.1412	29.2965	29.3782	29.9567	29.6796	29.5548	29.1412	29.2965	29.3782	29.9567	29.6796	29.5548	17	24.5	121.75	0	189.59	70
LOC_Os07g46460.1	Q69RJ0	ferredoxin-dependent glutamate synthase	30.3865	30.3275	30.3414	30.5272	30.5926	30.5314	30.3865	30.3275	30.3414	30.5272	30.5926	30.5314	31	27.4	175.04	0	305.97	132
LOC_Os07g46480.1	Q8GSB5	eukaryotic aspartyl protease domain containing protein	27.1151	26.9326	27.0915	26.8589	26.8271	27.0466	27.1151	26.9326	27.0915	26.8589	26.8271	27.0466	7	20	46.276	0	24.689	20
LOC_Os07g46660.2	Q7EZY9	ubiquitin carboxyl-terminal hydrolase domain containing protein	24.573	24.877	25.0084	25.2647	25.3924	25.2912	24.573	24.877	25.0084	25.2647	25.3924	25.2912	3	6.7	60.258	0	29.56	13
LOC_Os07g46750.1	P29545	elongation factor protein	29.8852	29.9875	29.8809	30.3366	30.4715	30.5236	29.8852	29.9875	29.8809	30.3366	30.4715	30.5236	9	54.9	23.799	0	67.081	61
LOC_Os07g46790.1	B9FUP9	4-alpha-glucanotransferase	28.02	28.1261	27.741	26.9119	26.4826	26.6506	28.02	28.1261	27.741	26.9119	26.4826	26.6506	11	16.2	108.29	0	55.512	20
LOC_Os07g46852.2	A0A0P0X9S9	sex determination tasselseed-2	NaN	NaN	NaN	27.8608	27.9138	27.8767	24.1797	24.5217	22.7959	27.8608	27.9138	27.8767	3	18.3	27.96	0	19.459	7
LOC_Os07g46920.1	Q0D3V1	sex determination tasselseed-2	26.6779	26.1659	26.0398	26.968	27.3341	26.7021	26.6779	26.1659	26.0398	26.968	27.3341	26.7021	3	25.8	30.985	0	42.587	12
LOC_Os07g47290.1	Q8H3Q7	xylose isomerase	27.2655	27.4331	27.2285	28.8114	28.9278	28.8169	27.2655	27.4331	27.2285	28.8114	28.9278	28.8169	11	26.9	53.494	0	54.355	28
LOC_Os07g47350.2	Q8H3P9	potassium transporter	24.8165	NaN	25.2365	25.5886	25.8148	26.0272	24.8165	22.5453	25.2365	25.5886	25.8148	26.0272	3	4	87.111	0	7.3701	9
LOC_Os07g47510.1	Q8H469	stress-related protein	26.8469	25.9839	25.8952	27.1238	27.2187	27.3114	26.8469	25.9839	25.8952	27.1238	27.2187	27.3114	4	23.1	27.392	0	63.299	18
LOC_Os07g47820.1	Q6ZDX3	acyl-CoA dehydrogenase family member 10	27.5042	26.9549	26.9774	27.8879	27.7804	27.8383	27.5042	26.9549	26.9774	27.8879	27.7804	27.8383	8	13.2	92.073	0	37.822	29
LOC_Os07g48020.1	Q7F1U0	peroxidase precursor	NaN	NaN	NaN	24.8873	25.1961	25.4707	23.9433	24.0847	24.2127	24.8873	25.1961	25.4707	2	11.4	32.889	0	9.0453	10
LOC_Os07g48244.1	Q0D3L5	ubiquinol-cytochrome c reductase complex 6.7 kDa protein	28.7771	29.294	29.2402	29.778	29.7377	29.8316	28.7771	29.294	29.2402	29.778	29.7377	29.8316	2	34.4	6.7457	0	17.874	6
LOC_Os07g48490.2	A3BNI4	stress responsive protein	30.0675	29.9509	30.0776	29.5266	29.4996	29.7063	30.0675	29.9509	30.0776	29.5266	29.4996	29.7063	9	45.2	38.528	0	43.86	53
LOC_Os07g48810.1	Q69WA8	parvulin-type peptidyl prolyl cis/trans isomerase	26.2467	26.5741	26.7295	27.377	27.7065	27.5198	26.2467	26.5741	26.7295	27.377	27.7065	27.5198	6	20.9	33.144	0	14.784	19
LOC_Os07g48960.1	Q69UZ3	OsLonP3 - Putative Lon protease homologue	26.2177	26.155	26.4989	26.6089	25.9267	26.2699	26.2177	26.155	26.4989	26.6089	25.9267	26.2699	5	8.9	106.81	0	17.737	15
LOC_Os07g49110.1	Q7XI67	D-alanine--D-alanine ligase family	27.8949	28.0799	28.0521	27.3935	27.3151	27.3682	27.8949	28.0799	28.0521	27.3935	27.3151	27.3682	8	11.6	103.39	0	19.357	23
LOC_Os07g49330.1	Q6Z3Y9	phospholipase C	30.8259	30.8217	30.8599	31.5325	31.473	31.4894	30.8259	30.8217	30.8599	31.5325	31.473	31.4894	20	42.8	67.782	0	255.63	129
LOC_Os07g49400.2	Q9FE01	OsAPx2 - Cytosolic Ascorbate Peroxidase encoding gene 4	27.3211	27.1574	27.0446	28.0243	28.1169	28.0491	27.3211	27.1574	27.0446	28.0243	28.1169	28.0491	4	33.9	27.117	0	19.091	22
LOC_Os07g49410.1	Q6Z3Y1	uncharacterized ACR	26.489	26.623	26.7799	25.9438	NaN	NaN	26.489	26.623	26.7799	25.9438	23.4925	24.2786	5	13.7	44.887	0	10.696	7
LOC_Os08g01180.1	Q6Z1Y4	nicalin	28.1893	27.9309	28.2693	29.1464	28.8828	28.9392	28.1893	27.9309	28.2693	29.1464	28.8828	28.9392	8	21.3	60.656	0	67.539	35
LOC_Os08g01380.1	Q0J8M2	2Fe-2S iron-sulfur cluster binding domain containing protein	28.5051	28.9044	28.3577	29.2006	29.4461	29.2256	28.5051	28.9044	28.3577	29.2006	29.4461	29.2256	3	57.6	14.951	0	12.198	17
LOC_Os08g01760.1	Q6ZC70	dehydrogenase	25.5103	25.5315	25.9103	26.8947	27.0109	26.9365	25.5103	25.5315	25.9103	26.8947	27.0109	26.9365	3	8.1	44.9	0	9.0516	10
LOC_Os08g01900.1	Q6ZC56	armadillo/beta-catenin repeat family protein	26.2056	NaN	26.3291	27.149	27.0136	27.2974	26.2056	22.9128	26.3291	27.149	27.0136	27.2974	6	11.2	89.419	0	29.722	12
LOC_Os08g02060.1	Q6ZCC6	expressed protein	27.5646	27.6005	27.6174	27.4972	27.4458	27.6063	27.5646	27.6005	27.6174	27.4972	27.4458	27.6063	5	34.2	21.082	0	83.618	23
LOC_Os08g02120.1	Q0J8G4	kinase	27.6174	27.3402	27.512	27.2246	27.1463	27.1588	27.6174	27.3402	27.512	27.2246	27.1463	27.1588	6	23.8	35.516	0	38.526	17
LOC_Os08g02210.2	Q6YXS1	expressed protein;LOC_Os08g02210.1 LOC_Os08g02210.1	26.5949	26.6189	26.6614	24.9302	25.0956	24.9042	26.5949	26.6189	26.6614	24.9302	25.0956	24.9042	3	9.6	28.906	0	7.6082	16
LOC_Os08g02230.1	Q6YXT5	FAD-binding and arabino-lactone oxidase domains containing protein	28.7984	28.7534	28.8836	29.8413	30.0885	29.9618	28.7984	28.7534	28.8836	29.8413	30.0885	29.9618	12	29.2	63.601	0	99.949	58
LOC_Os08g02340.2	Q69UI8	60S acidic ribosomal protein	28.7504	29.2909	29.1976	29.3098	29.1336	29.1307	28.7504	29.2909	29.1976	29.3098	29.1336	29.1307	4	84.5	11.082	0	29.375	26
LOC_Os08g02410.1	Q69UI1	40S ribosomal S13	28.1449	27.8683	27.9051	27.8246	27.7608	27.8317	28.1449	27.8683	27.9051	27.8246	27.7608	27.8317	6	39.1	17.145	0	50.742	26
LOC_Os08g02420.1	Q84VG0	OsCML7 - Calmodulin-related calcium sensor protein	25.5751	25.7217	25.7842	28.1428	28.2126	28.3726	25.5751	25.7217	25.7842	28.1428	28.2126	28.3726	4	29.7	16.683	0	17.944	16
LOC_Os08g02640.5	Q9S827	succinate dehydrogenase iron-sulfur subunit 2	NaN	NaN	NaN	26.6375	26.6157	26.529	22.2159	23.3086	24.65	26.6375	26.6157	26.529	5	20.3	31.118	0	10.462	9
LOC_Os08g02690.1	Q6YPF2	MA3 domain containing protein	29.4331	29.3892	29.2616	30.2363	30.276	30.1681	29.4331	29.3892	29.2616	30.2363	30.276	30.1681	14	28.6	78.584	0	82.769	69
LOC_Os08g02860.1	Q6YX33	transposon protein	25.8732	26.3232	25.8549	26.0135	26.0942	26.1907	25.8732	26.3232	25.8549	26.0135	26.0942	26.1907	4	10.1	58.968	0	10.467	13
LOC_Os08g03290.1	I3QD45	glyceraldehyde-3-phosphate dehydrogenase	28.7329	28.4837	28.506	27.7011	28.1618	27.5665	28.7329	28.4837	28.506	27.7011	28.1618	27.5665	6	46	36.412	0	83.965	30
LOC_Os08g03380.1	Q6ZK49	heat shock DnaJ	27.2865	27.1854	27.3287	27.4285	27.4753	27.3563	27.2865	27.1854	27.3287	27.4285	27.4753	27.3563	3	15.4	32.466	0	54.572	20
LOC_Os08g03520.1	Q84UR8	retrotransposon protein	27.2584	27.3826	27.7003	28.2718	28.022	28.1654	27.2584	27.3826	27.7003	28.2718	28.022	28.1654	3	33	18.694	0	49.623	20
LOC_Os08g03570.1	Q8H0B2	NAD dependent epimerase/dehydratase family protein	24.8168	25.2044	24.8783	26.3242	26.1922	26.0584	24.8168	25.2044	24.8783	26.3242	26.1922	26.0584	2	9.1	44.827	0	14.934	13
LOC_Os08g03640.1	P41095	60S acidic ribosomal P0	30.9011	30.7293	30.8972	29.9334	29.9496	29.9434	30.9011	30.7293	30.8972	29.9334	29.9496	29.9434	10	39.2	34.377	0	193.34	48
LOC_Os08g04180.1	Q6YYB9	tryptophan synthase beta chain 1	26.7025	27.1314	26.9047	28.3703	28.1732	28.2659	26.7025	27.1314	26.9047	28.3703	28.1732	28.2659	7	16.6	49.999	0	25.716	22
LOC_Os08g04460.1	Q6ZKI0	NADPH-dependent FMN reductase domain containing protein	27.5737	27.6753	27.7487	27.5984	27.4093	27.4006	27.5737	27.6753	27.7487	27.5984	27.4093	27.4006	6	43.8	21.589	0	31.746	33
LOC_Os08g04620.1	Q6YZ10	MSP domain containing protein	25.8469	25.6816	25.8911	27.4367	27.3453	27.4583	25.8469	25.6816	25.8911	27.4367	27.3453	27.4583	4	16.7	25.637	0	11.903	12
LOC_Os08g04630.1	Q6YZ09	external NADH-ubiquinone oxidoreductase 1	NaN	NaN	NaN	27.2696	27.2077	27.1853	23.7542	24.16	24.0065	27.2696	27.2077	27.1853	2	5.9	39.58	0	5.1625	3
LOC_Os08g05620.1	Q84S04	cytochrome P450	26.0483	26.221	26.1046	25.7899	25.6854	25.9058	26.0483	26.221	26.1046	25.7899	25.6854	25.9058	4	12.8	56.387	0	25.895	19
LOC_Os08g05650.2	Q84S01	diacylglycerol kinase	25.9209	25.7129	NaN	25.0088	25.0071	25.0487	25.9209	25.7129	21.9465	25.0088	25.0071	25.0487	2	7.3	34.587	0	5.8036	5
LOC_Os08g05830.1	Q84ZL6	transaldolase	27.3076	26.8173	27.1004	27.3358	27.2972	26.8682	27.3076	26.8173	27.1004	27.3358	27.2972	26.8682	5	20.6	43.019	0	18.161	15
LOC_Os08g05850.1	Q0J7Y5	LSM domain containing protein	27.0293	26.9238	26.4175	NaN	NaN	NaN	27.0293	26.9238	26.4175	23.7694	24.3431	24.7561	3	49.5	10.737	0	21.141	7
LOC_Os08g06020.1	Q6ZD98	MSP domain containing protein	27.4908	27.4725	27.4078	28.176	28.2166	28.171	27.4908	27.4725	27.4078	28.176	28.2166	28.171	8	37.4	26.86	0	27.485	25
LOC_Os08g33920.1	Q6Z537	60S ribosomal L34	28.6042	28.2975	28.1588	27.4045	28.0468	28.2527	28.6042	28.2975	28.1588	27.4045	28.0468	28.2527	2	24.6	13.634	0	36.499	11
LOC_Os08g06100.1	Q6ZD89	O-methyltransferase	27.1747	26.9265	27.1368	27.1298	27.2805	27.135	27.1747	26.9265	27.1368	27.1298	27.2805	27.135	5	24.7	39.749	0	13.339	25
LOC_Os08g06200.1	Q7EZD2	stomatin-like 2	28.6795	28.7852	28.734	29.5046	29.5123	29.4516	28.6795	28.7852	28.734	29.5046	29.5123	29.4516	12	35.8	41.927	0	50.063	48
LOC_Os08g06250.1	Q7EZC8	tetraspanin family protein	NaN	NaN	NaN	26.549	26.3262	26.5314	24.7328	23.4507	24.5821	26.549	26.3262	26.5314	3	11.5	30.664	0	8.3804	8
LOC_Os08g06380.2	Q84UP7	CSLF6 - cellulose synthase-like family F;beta1	25.2493	25.1757	25.1643	NaN	NaN	NaN	25.2493	25.1757	25.1643	23.5683	23.8412	24.8737	4	5.5	95.42	0	14.675	9
LOC_Os08g06430.1	Q84SD6	mitochondrial NADH-ubiquinone oxidoreductase	25.5982	25.6382	25.6134	26.3043	26.2391	27.3694	25.5982	25.6382	25.6134	26.3043	26.2391	27.3694	3	15.4	12.526	0	13.366	11
LOC_Os08g06480.1	Q0J7U6	lissencephaly type-1-like homology motif	25.59	25.7352	26.0792	25.4147	25.2855	25.3188	25.59	25.7352	26.0792	25.4147	25.2855	25.3188	3	7.9	124.78	0	5.2474	5
LOC_Os08g06530.1	Q84SC5	rubredoxin family protein	33.0227	32.8503	33.0265	30.528	30.5701	30.2909	33.0227	32.8503	33.0265	30.528	30.5701	30.2909	6	29.6	27.485	0	239.71	53
LOC_Os08g08060.1	Q6ZKF1	vacuolar sorting-associated 18	25.2326	25.71	25.394	26.5324	25.9556	26.154	25.2326	25.71	25.394	26.5324	25.9556	26.154	7	8.7	112.98	0	25.523	17
LOC_Os08g08110.1	Q0J7M1	diacylglycerol kinase	26.8737	27.1437	27.1084	27.7115	27.9146	27.7282	26.8737	27.1437	27.1084	27.7115	27.9146	27.7282	6	14.1	55.854	0	22.723	18
LOC_Os08g09100.1	A0A0P0XCP2	RNA recognition motif containing protein	25.624	26.399	NaN	25.0084	25.0613	25.0592	25.624	26.399	23.0148	25.0084	25.0613	25.0592	1	4.8	47.009	0	6.2746	4
LOC_Os08g09200.1	B9FZG0	aconitate hydratase protein	27.2874	27.3223	27.2548	28.2585	28.1174	28.1504	27.2874	27.3223	27.2548	28.2585	28.1174	28.1504	10	16.8	107.62	0	22.589	31
LOC_Os08g09250.2	A3BQD6	glyoxalase family protein	27.364	27.2432	27.4997	27.8949	27.9839	27.9196	27.364	27.2432	27.4997	27.8949	27.9839	27.9196	5	21	32.553	0	10.848	21
LOC_Os08g09940.1	Q6Z1J6	GTP-binding protein	26.2473	26.3989	25.9183	25.1014	NaN	25.2116	26.2473	26.3989	25.9183	25.1014	24.5736	25.2116	5	16	44.332	0	11.971	11
LOC_Os08g10020.2	Q6ZBV1	photosystem II 10 kDa polypeptide	33.4775	33.7965	33.9459	31.0795	31.0044	31.1742	33.4775	33.7965	33.9459	31.0795	31.0044	31.1742	4	23.8	13.226	0	135.56	277
LOC_Os08g10310.2	Q6ZKW7	SHR5-receptor-like kinase	NaN	NaN	NaN	26.4792	26.71	26.6764	23.3631	23.1983	24.1395	26.4792	26.71	26.6764	1	3.2	92.633	0	7.5749	6
LOC_Os08g10450.1	Q4W6L4	nucleoside transporter	24.76	24.7197	24.5321	24.3699	24.4108	NaN	24.76	24.7197	24.5321	24.3699	24.4108	24.7448	2	9.2	45.473	0	5.0344	10
LOC_Os08g12820.1	Q6Z921	proteasome/cyclosome repeat containing protein	27.8531	27.5579	27.5201	28.1537	28.3034	27.9596	27.8531	27.5579	27.5201	28.1537	28.3034	27.9596	3	9.8	106.96	0	34.082	22
LOC_Os08g12840.1	A3BQT1	FabA-like domain containing protein	28.1761	27.2953	28.1423	NaN	24.5522	NaN	28.1761	27.2953	28.1423	24.8305	24.5522	23.9317	6	15.7	38.716	0	29.094	18
LOC_Os08g13690.1	Q6YYR2	60S ribosomal L7	29.3375	29.3256	29.3707	28.7839	28.5899	28.8661	29.3375	29.3256	29.3707	28.7839	28.5899	28.8661	4	35.9	28.453	0	60.394	34
LOC_Os08g13920.1	Q76BW5	glycosyl hydrolases family 16	24.4096	24.1895	24.6169	NaN	NaN	NaN	24.4096	24.1895	24.6169	24.0733	24.9649	22.8383	2	9.7	32.096	0	6.7312	7
LOC_Os08g14230.1	Q0J716	villin	25.29	25.1874	25.4239	26.4142	26.3232	26.4167	25.29	25.1874	25.4239	26.4142	26.3232	26.4167	3	7.3	72.23	0	8.1563	8
LOC_Os08g14440.2	Q0J709	uridylyltransferase-related	31.4834	31.2348	31.541	31.3432	31.5474	31.3233	31.4834	31.2348	31.541	31.3432	31.5474	31.3233	8	37.1	30.322	0	118.21	84
LOC_Os08g14620.1	Q6Z0T9	expressed protein	24.7631	24.8995	24.9967	25.8246	NaN	NaN	24.7631	24.8995	24.9967	25.8246	23.5113	23.9081	2	3.4	67.932	0	4.8633	7
LOC_Os08g15040.1	Q6YW27	ADP-ribosylation factor	26.9585	26.9263	27.3265	27.3362	27.3772	27.3055	26.9585	26.9263	27.3265	27.3362	27.3772	27.3055	3	25.8	20.397	0	7.9252	8
LOC_Os08g15460.1	Q6ZG25	pretranslocase subunit secY	28.7974	28.9948	28.7935	27.0172	26.9908	26.7083	28.7974	28.9948	28.7935	27.0172	26.9908	26.7083	6	16	59.529	0	118.69	40
LOC_Os08g16570.1	A0A0P0XEB3	expressed protein	27.1741	27.5641	27.5533	27.1685	27.2149	27.0144	27.1741	27.5641	27.5533	27.1685	27.2149	27.0144	5	36.1	28.904	0	21.657	28
LOC_Os08g17390.1	Q6ZG03	expressed protein	31.5514	31.4706	31.4667	29.0879	28.9264	29.0259	31.5514	31.4706	31.4667	29.0879	28.9264	29.0259	16	41.6	51.661	0	198.74	73
LOC_Os08g17600.2	Q6Z1L9	SNARE domain containing protein	25.1887	25.0857	25.0934	27.4309	27.4216	27.254	25.1887	25.0857	25.0934	27.4309	27.4216	27.254	4	22.8	26.038	0	21.187	10
LOC_Os08g18044.1	Q6YS19	tetraspanin family protein	27.4345	27.4888	27.6488	28.5074	28.4167	28.4571	27.4345	27.4888	27.6488	28.5074	28.4167	28.4571	3	31.8	14.732	0	65.031	15
LOC_Os08g18110.1	Q6YS11	alpha-soluble NSF attachment protein	28.7531	28.6261	28.6923	29.7651	29.5917	29.793	28.7531	28.6261	28.6923	29.7651	29.5917	29.793	8	36.3	32.485	0	54.098	45
LOC_Os08g19140.1	Q0J6P7	adenylate kinase family protein	30.076	30.2194	29.9242	29.472	29.4524	29.4655	30.076	30.2194	29.9242	29.472	29.4524	29.4655	14	32.6	66.883	0	228.64	85
LOC_Os08g19610.3	Q84YY4	peptidyl-prolyl cis-trans isomerase	25.8427	25.2162	25.5386	24.8362	24.8031	24.9234	25.8427	25.2162	25.5386	24.8362	24.8031	24.9234	3	9.5	35.887	0	7.7492	7
LOC_Os08g19650.2	Q0J6N4	homeobox knotted-1	27.2491	26.8195	27.0729	27.2253	27.2872	27.4222	27.2491	26.8195	27.0729	27.2253	27.2872	27.4222	3	21.8	30.288	0	10.894	14
LOC_Os08g20544.1	Q6UU05	expressed protein	25.8805	26.3152	25.999	26.6763	26.6998	26.4409	25.8805	26.3152	25.999	26.6763	26.6998	26.4409	8	27.7	47.897	0	13.579	20
LOC_Os08g20570.2	Q6ZDC2	chloride channel protein	25.8468	25.5126	25.2257	26.2974	26.2682	26.3019	25.8468	25.5126	25.2257	26.2974	26.2682	26.3019	2	2.9	82.575	0	13.457	8
LOC_Os08g20660.2	Q6ZHZ1	sucrose-phosphate synthase	25.8579	26.1014	25.9157	26.2858	26.3291	26.727	25.8579	26.1014	25.9157	26.2858	26.3291	26.727	5	8.9	118.72	0	12.607	12
LOC_Os08g21660.2	Q6YS69	WD domain	26.7372	26.8029	26.7537	27.1558	27.1765	27.3445	26.7372	26.8029	26.7537	27.1558	27.1765	27.3445	7	36.8	35.241	0	41.767	26
LOC_Os08g22149.1	Q69LL7	CBS domain containing membrane protein	NaN	25.3066	NaN	25.0265	24.8377	24.8932	23.7114	25.3066	23.7692	25.0265	24.8377	24.8932	2	12.8	25.139	0	9.4635	8
LOC_Os08g22354.2	Q6Z050	polyadenylate-binding protein	27.6029	27.6895	27.5688	25.9229	25.8579	26.0113	27.6029	27.6895	27.5688	25.9229	25.8579	26.0113	4	13.6	70.227	0	19.066	18
LOC_Os08g22864.1	Q69PQ1	sec8 exocyst complex component specific domain containing protein	26.0448	26.329	26.1714	27.4916	27.4025	27.4515	26.0448	26.329	26.1714	27.4916	27.4025	27.4515	9	10.5	117.4	0	26.52	23
LOC_Os08g23180.1	Q8H3S1	fasciclin-like arabinogalactan 8 precursor	26.4424	26.4202	26.1794	26.548	26.535	26.5885	26.4424	26.4202	26.1794	26.548	26.535	26.5885	4	15.2	43.653	0	6.3419	11
LOC_Os08g23360.1	B9G0A9	signal recognition particle 68 kDa protein	25.6812	25.7137	25.5342	27.256	27.2695	27.1713	25.6812	25.7137	25.5342	27.256	27.2695	27.1713	8	17.4	70.367	0	37.19	17
LOC_Os08g23410.1	Q6Z0E5	rubredoxin family protein	27.9335	28.0403	27.863	27.9639	27.9538	27.8793	27.9335	28.0403	27.863	27.9639	27.9538	27.8793	3	29	23.523	0	77.157	25
LOC_Os09g32976.1	P0DKK7	ribosomal L7Ae	28.7781	28.7918	28.7808	27.0127	27.1695	27.3383	28.7781	28.7918	28.7808	27.0127	27.1695	27.3383	4	20.5	29.304	0	39.664	31
LOC_Os08g23730.1	Q8H4X9	class I glutamine amidotransferase	23.7275	23.8602	NaN	24.1737	24.2154	24.6372	23.7275	23.8602	22.8238	24.1737	24.2154	24.6372	2	4.2	59.586	0	3.3816	4
LOC_Os08g24390.1	Q6YTR3	expressed protein;LOC_Os08g24390.2 LOC_Os08g24390.2	27.2913	27.2021	27.0746	26.1784	26.369	26.0911	27.2913	27.2021	27.0746	26.1784	26.369	26.0911	7	18.8	60.677	0	42.232	19
LOC_Os08g25590.3	Q6ZB58	UPF0041 domain containing protein	28.6132	28.7074	28.7427	28.5474	28.6599	28.6959	28.6132	28.7074	28.7427	28.5474	28.6599	28.6959	6	57.8	12.238	0	15.35	24
LOC_Os08g25700.1	Q84QU2	expressed protein	25.7666	25.7302	25.8956	NaN	NaN	NaN	25.7666	25.7302	25.8956	23.3469	24.6188	24.163	2	7.6	38.558	0	28.974	4
LOC_Os08g25720.1	Q84QT9	pyrophosphate--fructose 6-phosphate 1-phosphotransferase subunit alpha	26.4945	NaN	NaN	27.2695	27.7159	27.1231	26.4945	25.131	24.4118	27.2695	27.7159	27.1231	5	11	67.154	0	10.6	8
LOC_Os10g32400.2	Q109K8	PsbP	30.5174	30.7126	30.688	29.7555	29.5986	29.6675	30.5174	30.7126	30.688	29.7555	29.5986	29.6675	8	46.5	22.49	0	72.824	41
LOC_Os08g26710.1	Q6Z5Z5	plant of unknown function domain containing protein	NaN	NaN	NaN	26.5196	26.5171	26.5679	23.3952	23.1209	23.982	26.5196	26.5171	26.5679	3	9.3	56.834	0	11.646	11
LOC_Os08g27010.1	Q6YZK5	APE1	30.8968	30.8304	30.9572	29.3608	29.3953	29.4143	30.8968	30.8304	30.9572	29.3608	29.3953	29.4143	10	34.7	28.739	0	78.557	46
LOC_Os08g27840.2	Q8H4V1	phosphoenolpyruvate carboxylase	27.8271	27.7745	27.823	28.1865	28.231	28.0355	27.8271	27.7745	27.823	28.1865	28.231	28.0355	10	17.4	100.98	0	48.8	28
LOC_Os08g29110.2	Q8H2V6	thioredoxin	NaN	NaN	NaN	25.7516	25.7725	25.7102	23.0094	23.3761	22.2238	25.7516	25.7725	25.7102	2	34.7	8.3543	0	7.5976	4
LOC_Os08g29170.1	Q7EYM8	dehydrogenase	27.3576	27.3605	27.2612	26.8216	26.8212	26.7752	27.3576	27.3605	27.2612	26.8216	26.8212	26.7752	6	23.1	39.582	0	33.014	20
LOC_Os08g29370.2	Q6YW78	peptidyl-prolyl cis-trans isomerase	27.6129	27.6459	27.4449	27.8529	27.7364	27.598	27.6129	27.6459	27.4449	27.8529	27.7364	27.598	8	33.8	46.481	0	31.382	27
LOC_Os08g29780.1	Q0J5Y7	expressed protein	25.6222	25.8582	25.8392	NaN	NaN	NaN	25.6222	25.8582	25.8392	24.0584	23.4757	24.1791	3	8.2	48.925	0	14.173	6
LOC_Os08g30020.6	Q6Z001	membrane protein	27.65	27.6704	NaN	28.6685	28.8583	28.6528	27.65	27.6704	23.3809	28.6685	28.8583	28.6528	2	9.2	29.522	0	97.571	12
LOC_Os08g30060.2	Q6ZBF6	proton pump interactor	26.6835	26.9389	26.7853	27.4078	27.5062	27.0502	26.6835	26.9389	26.7853	27.4078	27.5062	27.0502	7	17.1	69.312	0	26.567	23
LOC_Os08g30790.3	Q6ZIV7	hypersensitive-induced response protein	29.1662	29.4335	29.3364	31.349	31.4909	31.5564	29.1662	29.4335	29.3364	31.349	31.4909	31.5564	7	34.9	31.379	0	50.294	43
LOC_Os08g30884.1	A0A0P0XFQ5	elongation factor Ts	NaN	NaN	25.1524	25.7489	25.7788	25.8365	22.1962	22.8707	25.1524	25.7489	25.7788	25.8365	3	14.5	40.013	0	6.1135	4
LOC_Os08g32630.1	Q7EYS3	FAD dependent oxidoreductase	27.9293	28.1205	27.8581	27.382	27.3246	27.3615	27.9293	28.1205	27.8581	27.382	27.3246	27.3615	9	21.5	67.18	0	79.921	39
LOC_Os08g32850.1	Q6YZ75	methylcrotonoyl-CoA carboxylase beta chain	NaN	24.4817	25.0648	26.4498	26.3982	26.6396	22.8714	24.4817	25.0648	26.4498	26.3982	26.6396	5	12.2	60.816	0	18.829	12
LOC_Os08g32980.2	Q84Q47	expressed protein;LOC_Os08g32980.1 LOC_Os08g32980.1	25.2831	NaN	25.17	26.6697	26.4968	26.393	25.2831	23.274	25.17	26.6697	26.4968	26.393	3	21.2	21.433	0	16.207	13
LOC_Os08g33120.5	Q7EY69	RNA recognition motif containing protein	25.4764	25.4681	25.2194	25.1288	25.0397	25.0964	25.4764	25.4681	25.2194	25.1288	25.0397	25.0964	3	25	18.052	0	8.6011	10
LOC_Os08g33370.2	Q0J5J5	14-3-3 protein	29.9151	30.0241	30.0995	30.9056	31.0475	30.8263	29.9151	30.0241	30.0995	30.9056	31.0475	30.8263	6	47.7	28.826	0	175.79	56
LOC_Os08g33380.2	Q6ZKB9	expressed protein;LOC_Os08g33380.1 LOC_Os08g33380.1	26.4806	26.6683	26.8945	NaN	25.4367	NaN	26.4806	26.6683	26.8945	22.6561	25.4367	24.382	3	21.4	17.58	0	14.015	10
LOC_Os08g33440.1	Q6ZKB1	2-oxo acid dehydrogenases acyltransferase domain containing protein	26.5916	26.984	26.7075	25.0679	24.8633	24.9635	26.5916	26.984	26.7075	25.0679	24.8633	24.9635	4	20.4	48.832	0	13.858	10
LOC_Os08g33460.1	Q6ZKB0	expressed protein	28.1547	28.0363	28.0934	29.3836	29.4579	29.4817	28.1547	28.0363	28.0934	29.3836	29.4579	29.4817	4	48	11.021	0	73.821	42
LOC_Os08g33820.1	Q6YWJ7	chlorophyll A-B binding protein	33.3093	33.1131	33.225	32.9122	32.6632	32.8377	33.3093	33.1131	33.225	32.9122	32.6632	32.8377	8	60.2	26.955	0	73.803	92
LOC_Os08g34060.4	Q6Z9J1	DUF1336 domain containing protein	26.5085	26.6657	26.7985	26.6769	26.6228	26.6424	26.5085	26.6657	26.7985	26.6769	26.6228	26.6424	5	10.6	73.802	0	28.234	16
LOC_Os08g34150.1	Q6Z9F9	OsTIL-2 Temperature-induced lipocalin-2	28.5678	28.5801	28.6162	29.1491	29.1517	29.1435	28.5678	28.5801	28.6162	29.1491	29.1517	29.1435	4	21.2	20.586	0	27.388	25
LOC_Os08g34210.1	Q6Z9G0	aldehyde dehydrogenase	27.0334	27.0051	27.1074	27.2797	27.1617	27.1898	27.0334	27.0051	27.1074	27.2797	27.1617	27.1898	6	17	53.369	0	23.162	21
LOC_Os08g34220.1	Q6Z9G4	omega-6 fatty acid desaturase	27.1234	26.8833	26.9918	26.6278	26.8418	26.8431	27.1234	26.8833	26.9918	26.6278	26.8418	26.8431	5	13.9	52.243	0	14.646	13
LOC_Os08g34720.1	Q6ZAA5	D-3-phosphoglycerate dehydrogenase	26.3611	26.531	26.4762	27.4781	27.6218	27.6077	26.3611	26.531	26.4762	27.4781	27.6218	27.6077	5	14.7	64.558	0	32.737	18
LOC_Os08g34750.1	A0A0P0XGM9	serine esterase family protein	24.9063	24.902	24.9593	25.3978	25.8121	25.557	24.9063	24.902	24.9593	25.3978	25.8121	25.557	3	6.9	46.709	0	14.132	7
LOC_Os08g34970.1	Q6ZLF0	conserved oligomeric Golgi complex component 3	NaN	NaN	NaN	24.905	25.1225	24.8353	23.6229	22.6442	24.1607	24.905	25.1225	24.8353	3	5.5	87.311	0	9.8675	6
LOC_Os08g35740.1	Q6Z965	12-oxophytodienoate reductase	NaN	NaN	NaN	26.026	25.9557	25.9674	23.7168	24.2734	23.5324	26.026	25.9557	25.9674	3	11.4	43.677	0	8.0386	5
LOC_Os08g35760.1	Q6ZBZ2	Cupin domain containing protein	31.6827	31.7014	31.5331	30.6791	30.7997	30.7355	31.6827	31.7014	31.5331	30.6791	30.7997	30.7355	3	16	21.861	0	107.25	18
LOC_Os08g36140.1	Q6YUA8	expressed protein	25.9706	25.8856	26.0454	NaN	NaN	NaN	25.9706	25.8856	26.0454	24.0703	24.9335	24.1615	2	16.6	20.029	0	7.7411	6
LOC_Os08g36150.1	Q6YUA7	activator of 90 kDa heat shock ATPase homolog	27.9977	27.824	27.7847	28.162	27.9988	27.8633	27.9977	27.824	27.7847	28.162	27.9988	27.8633	8	39	39.227	0	46.207	35
LOC_Os08g37320.1	Q7XXS0	expressed protein	29.8763	29.9435	29.8366	30.6149	30.7101	30.7055	29.8763	29.9435	29.8366	30.6149	30.7101	30.7055	13	58.6	19.725	0	34.166	64
LOC_Os08g37370.2	Q6YXI3	mitochondrial carrier protein	23.82	NaN	23.9286	24.6593	25.3732	24.7177	23.82	22.1916	23.9286	24.6593	25.3732	24.7177	3	12.2	33.985	0	5.2775	4
LOC_Os08g37444.4	Q6Z246	signal recognition particle receptor	NaN	25.0854	NaN	26.1383	25.8484	26.1945	24.1135	25.0854	23.8181	26.1383	25.8484	26.1945	4	8.4	64.492	0	12.63	11
LOC_Os08g37490.1	Q84J55	14-3-3 protein	30.2299	30.3691	30.1658	31.096	31.1077	30.9595	30.2299	30.3691	30.1658	31.096	31.1077	30.9595	6	52.7	29	0	60.079	90
LOC_Os08g37600.1	Q6Z229	citrate transporter	29.0579	29.106	28.9927	29.2858	29.3922	29.5157	29.0579	29.106	28.9927	29.2858	29.3922	29.5157	2	4	59.02	0	4.4633	11
LOC_Os08g37610.2	Q6Z233	expressed protein;LOC_Os08g37610.1 LOC_Os08g37610.1	27.2476	26.9559	27.4317	27.4886	26.6828	26.7568	27.2476	26.9559	27.4317	27.4886	26.6828	26.7568	8	16	88.88	0	54.858	26
LOC_Os08g37790.1	Q6YTT3	phospho-2-dehydro-3-deoxyheptonate aldolase	29.0435	29.1717	29.0254	29.8489	29.7996	29.8046	29.0435	29.1717	29.0254	29.8489	29.7996	29.8046	9	29.7	56.434	0	149.82	47
LOC_Os08g37950.1	Q6ZDR8	copper-transporting ATPase PAA1	25.5377	25.3583	25.2372	NaN	NaN	NaN	25.5377	25.3583	25.2372	24.2436	23.6162	23.5568	2	3.5	100.25	0	3.9007	5
LOC_Os08g38410.3	Q6Z8U4	RNA recognition motif containing protein	NaN	NaN	NaN	25.1551	24.9302	25.0004	23.0539	22.7499	23.3519	25.1551	24.9302	25.0004	2	8	38.125	0.0011531	2.5344	3
LOC_Os08g39100.1	Q6ZKL8	phosphatase 2C	25.4088	25.4626	25.599	26.9819	27.0301	26.9415	25.4088	25.4626	25.599	26.9819	27.0301	26.9415	5	13.6	57.67	0	26.916	13
LOC_Os08g39140.2	E0X6U7	heat shock protein	26.1884	26.2037	26.241	25.897	25.8753	25.8703	26.1884	26.2037	26.241	25.897	25.8753	25.8703	3	33.8	74.23	0	8.6522	11
LOC_Os08g39300.4	Q6ZFI6	aminotransferase	29.5696	29.2793	29.4664	29.855	30.0473	29.6954	29.5696	29.2793	29.4664	29.855	30.0473	29.6954	10	32.1	44.265	0	89.418	51
LOC_Os08g39350.1	Q6ZFH9	glycerophosphoryl diester phosphodiesterase family protein	25.8195	25.6177	25.8094	28.0764	28.0438	27.587	25.8195	25.6177	25.8094	28.0764	28.0438	27.587	8	15.7	83.578	0	28.272	17
LOC_Os08g39430.1	Q6ZK86	thylakoid lumenal 19 kDa protein	27.896	27.7612	27.7551	28.3597	28.4203	28.1885	27.896	27.7612	27.7551	28.3597	28.4203	28.1885	7	47.3	25.51	0	33.69	38
LOC_Os08g39840.1	Q0J4K2	lipoxygenase	NaN	NaN	NaN	27.3368	27.2666	27.1671	23.6164	23.3414	23.6147	27.3368	27.2666	27.1671	5	10.5	102.82	0	20.406	18
LOC_Os08g39850.4	A7UMR2	lipoxygenase	NaN	NaN	NaN	26.6228	26.5206	26.5828	23.3449	23.7684	23.6089	26.6228	26.5206	26.5828	3	9.1	92.381	0	12.839	9
LOC_Os08g39860.1	Q84YK7	Os8bglu27 - beta-glucosidase homologue	25.2262	25.0423	25.0094	NaN	NaN	NaN	25.2262	25.0423	25.0094	23.8606	23.1735	23.8554	2	6.2	56.803	0	8.3235	7
LOC_Os08g40090.1	Q6Z8P4	leucine rich repeat containing protein	27.6892	27.6094	27.8863	28.1699	28.1048	28.2033	27.6892	27.6094	27.8863	28.1699	28.1048	28.2033	11	29.3	62.342	0	35.383	31
LOC_Os08g40160.1	Q6Z8N7	thylakoid lumen protein	28.0025	27.908	28.1031	28.4389	28.5151	28.394	28.0025	27.908	28.1031	28.4389	28.5151	28.394	5	39.3	25.896	0	135.62	23
LOC_Os08g40790.3	Q6ZBK6	DNA repair ATPase-related	27.4109	27.5735	27.2562	27.5837	27.3043	27.6944	27.4109	27.5735	27.2562	27.5837	27.3043	27.6944	5	12.6	50.815	0	44.851	18
LOC_Os08g41090.1	A3BUY8	peroxidase precursor	25.437	25.3813	25.6882	25.6524	25.618	25.6454	25.437	25.3813	25.6882	25.6524	25.618	25.6454	2	9.4	35.548	0	18.453	12
LOC_Os08g41110.1	Q7F1J8	chaperone dnaJ 10	NaN	NaN	NaN	24.9383	25.383	25.4311	23.7101	23.0501	24.0282	24.9383	25.383	25.4311	2	8.4	44.232	0	7.2996	7
LOC_Os08g41250.2	Q6ZK21	signal recognition particle receptor subunit beta	27.7095	27.6312	27.5698	28.4556	28.29	28.4271	27.7095	27.6312	27.5698	28.4556	28.29	28.4271	5	28.5	28.307	0	35.341	26
LOC_Os08g41280.1	Q7F1F1	membrane protein	27.095	27.0814	27.0223	26.2713	25.6552	25.9488	27.095	27.0814	27.0223	26.2713	25.6552	25.9488	3	15.1	40.893	0	17.432	11
LOC_Os08g41460.2	Q7F1E4	expressed protein;LOC_Os08g41460.10 LOC_Os08g41460.10	29.9851	29.7971	29.7662	28.032	27.8107	27.8085	29.9851	29.7971	29.7662	28.032	27.8107	27.8085	6	24	36.559	0	30.609	32
LOC_Os08g41790.1	Q6ZIA3	phosphoribulokinase/Uridine kinase family protein	NaN	NaN	NaN	24.8821	24.814	25.1446	22.8371	23.6044	23.6334	24.8821	24.814	25.1446	2	5.1	54.446	0	4.0016	5
LOC_Os08g41810.1	Q6ZIA1	ribosomal L22	26.8802	26.8048	26.7621	26.105	26.4274	26.254	26.8802	26.8048	26.7621	26.105	26.4274	26.254	2	20.5	19.483	0	4.7189	16
LOC_Os08g41990.1	Q6YZE2	aminotransferase	30.5495	30.484	30.5548	30.6635	30.5828	30.5761	30.5495	30.484	30.5548	30.6635	30.5828	30.5761	13	43.7	50.237	0	150.06	61
LOC_Os08g42010.1	Q6YZD9	nodulin	24.4726	24.8913	24.4255	25.8818	25.2429	26.0427	24.4726	24.8913	24.4255	25.8818	25.2429	26.0427	3	4.9	64.176	0	13.388	7
LOC_Os08g42050.1	Q6YZD2	emp24/gp25L/p24 family protein	26.0604	26.0494	26.188	NaN	26.1531	26.4571	26.0604	26.0494	26.188	23.7275	26.1531	26.4571	3	22.2	24.565	0	8.622	9
LOC_Os08g42580.4	A0A0P0XII1	kinase domain containing protein	NaN	NaN	NaN	28.3796	28.2386	28.2839	23.3207	23.749	23.9188	28.3796	28.2386	28.2839	5	22.5	37.403	0	7.7419	10
LOC_Os08g42850.1	Q6ZIT9	peptidyl-prolyl cis-trans isomerase	26.6227	26.6234	26.9268	26.5034	26.5427	26.6449	26.6227	26.6234	26.9268	26.5034	26.5427	26.6449	3	14.6	27.118	0	6.9174	13
LOC_Os08g43040.2	Q6ZBI7	transferase family protein	NaN	23.9842	NaN	24.4171	24.437	24.5343	23.8363	23.9842	24.3154	24.4171	24.437	24.5343	2	5.4	49.251	0	4.5696	9
LOC_Os08g43060.3	Q6ZBI5	expressed protein;LOC_Os08g43060.2 LOC_Os08g43060.2	24.3698	24.34	24.2083	NaN	25.4774	24.5972	24.3698	24.34	24.2083	22.6687	25.4774	24.5972	2	3.5	91.98	0	3.7242	4
LOC_Os08g43190.2	Q6ZBH2	dehydrogenase	25.9711	26.5886	26.0229	25.9256	26.098	26.1929	25.9711	26.5886	26.0229	25.9256	26.098	26.1929	5	15.2	39.331	0	18.344	17
LOC_Os08g43440.1	A3BVH2	cytochrome P450	27.799	27.609	27.7753	27.9928	28.0364	27.9156	27.799	27.609	27.7753	27.9928	28.0364	27.9156	8	16.6	56.307	0	35.306	30
LOC_Os08g43560.1	Q6ZJJ1	OsAPx4 - Peroxisomal Ascorbate Peroxidase encoding gene 5	33.4349	33.3978	33.1157	33.2894	33.3386	33.4724	33.4349	33.3978	33.1157	33.2894	33.3386	33.4724	20	58.8	31.738	0	204.02	135
LOC_Os08g43640.1	Q6ZJI3	26S proteasome non-ATPase regulatory subunit 3	27.0368	27.3199	27.2256	27.9083	27.837	28.0372	27.0368	27.3199	27.2256	27.9083	27.837	28.0372	6	32.5	55.197	0	32.43	30
LOC_Os08g44000.1	Q6Z3F9	uncharacterized ycf39	31.8632	31.8626	31.7659	30.6419	30.5197	30.6292	31.8632	31.8626	31.7659	30.6419	30.5197	30.6292	15	46.6	42.822	0	220.79	80
LOC_Os08g44270.1	Q6ZJ18	vignain precursor	NaN	NaN	NaN	26.9505	27.3279	26.857	24.0992	23.1483	23.4778	26.9505	27.3279	26.857	2	9.4	41.871	0	10.206	6
LOC_Os08g44280.2	Q6ZJ17	protein-L-isoaspartate O-methyltransferase	25.2824	24.8849	25.0346	NaN	NaN	NaN	25.2824	24.8849	25.0346	23.0652	24.8767	24.3321	2	20.3	24.881	0	4.1645	3
LOC_Os08g44320.1	Q6ZJ11	low molecular weight protein-tyrosine-phosphatase slr0328	23.8205	23.9736	NaN	25.4499	25.4699	25.529	23.8205	23.9736	22.9596	25.4499	25.4699	25.529	2	11.6	28.803	0	8.7225	8
LOC_Os08g44400.1	Q6YZJ0	glutathione S-transferase	30.5906	30.826	30.9271	29.4369	29.4615	29.3487	30.5906	30.826	30.9271	29.4369	29.4615	29.3487	6	27	37.218	0	90.35	47
LOC_Os08g44430.2	Q6YZI8	vesicle-associated membrane 727	NaN	25.3826	NaN	26.1909	25.9847	26.3766	23.8909	25.3826	24.882	26.1909	25.9847	26.3766	5	25.7	27.356	0	11.881	9
LOC_Os08g44480.1	Q6YZI2	40S ribosomal S25	27.4833	27.8051	27.5408	28.5609	28.5442	28.5029	27.4833	27.8051	27.5408	28.5609	28.5442	28.5029	3	29.6	12.068	0	23.241	11
LOC_Os08g44680.1	Q84PB4	photosystem I reaction center subunit II	35.153	35.284	35.344	34.465	34.4197	34.4871	35.153	35.284	35.344	34.465	34.4197	34.4871	11	54.2	22.034	0	143.01	230
LOC_Os08g44770.1	P93407	copper/zinc superoxide dismutase	26.0745	26.2246	26.5695	27.2991	27.3997	27.4623	26.0745	26.2246	26.5695	27.2991	27.3997	27.4623	3	28.4	21.301	0	19.077	16
LOC_Os08g44850.1	Q6ZBX9	C2 domain containing protein	26.2106	26.6223	27.036	27.5354	27.2898	27.4115	26.2106	26.6223	27.036	27.5354	27.2898	27.4115	4	28.9	30.344	0	35.172	20
LOC_Os08g44860.8	B7EA73	aminopeptidase	27.3894	27.3244	27.4398	27.27	27.0447	27.2439	27.3894	27.3244	27.4398	27.27	27.0447	27.2439	9	13.2	99.523	0	100.75	25
LOC_Os08g45010.1	Q84ZB2	ABC transporter	25.8749	25.6588	25.7807	25.9576	26.1941	26.1807	25.8749	25.6588	25.7807	25.9576	26.1941	26.1807	4	9.5	66.172	0	18.087	15
LOC_Os08g45030.1	Q7EZL2	multidrug resistance protein	26.3224	26.3312	26.3445	26.436	26.3737	26.4469	26.3224	26.3312	26.3445	26.436	26.3737	26.4469	7	9.2	145.19	0	31.393	20
LOC_Os08g45140.1	Q0J3L4	OsGrx_S12 - glutaredoxin subgroup I	25.1834	25.3468	25.2065	27.5494	27.5658	27.649	25.1834	25.3468	25.2065	27.5494	27.5658	27.649	3	29.9	17.832	0	8.2989	10
LOC_Os09g02284.1	Q6YX88	DNA-directed RNA polymerase subunit	NaN	NaN	24.3872	25.9928	25.9656	25.4634	23.5618	23.631	24.3872	25.9928	25.9656	25.4634	2	11.2	36.46	0	27.151	5
LOC_Os09g02700.1	Q6YYV1	polyadenylate-binding protein	28.8761	28.9497	28.5512	28.0075	27.9161	28.0096	28.8761	28.9497	28.5512	28.0075	27.9161	28.0096	9	25.2	71.63	0	50.774	43
LOC_Os09g02710.1	Q6YYV0	CBS domain containing membrane protein	NaN	NaN	NaN	25.7597	25.9526	25.8711	22.9841	24.7954	24.3931	25.7597	25.9526	25.8711	2	11.5	24.167	0	13.392	6
LOC_Os09g03600.1	Q6K272	immunoglobulin/major histocompatibility complex	24.55	NaN	24.4649	25.8933	25.8901	25.7216	24.55	24.4618	24.4649	25.8933	25.8901	25.7216	2	2.3	90.326	0	8.096	8
LOC_Os09g03620.1	Q6K270	wall-associated receptor kinase-like 20 precursor	27.1843	26.9663	26.9654	28.4033	28.5087	28.3476	27.1843	26.9663	26.9654	28.4033	28.5087	28.3476	7	17.9	59.067	0	36.589	29
LOC_Os09g04110.2	Q0J3D9	coatomer alpha subunit	27.0744	27.0353	27.1526	28.1078	28.2488	28.2914	27.0744	27.0353	27.1526	28.1078	28.2488	28.2914	4	23.8	136.56	0	15.116	20
LOC_Os09g04730.1	Q6K447	dehydrogenase/reductase SDR family member 2	NaN	24.1107	24.8069	26.1932	26.1398	25.5259	23.3624	24.1107	24.8069	26.1932	26.1398	25.5259	4	18.2	26.8	0	7.6957	7
LOC_Os09g04790.1	Q6K439	PAP fibrillin family domain containing protein	28.6378	28.8038	28.4636	30.0688	30.2021	29.891	28.6378	28.8038	28.4636	30.0688	30.2021	29.891	8	41.7	33.919	0	152.61	52
LOC_Os09g06230.1	Q69ML2	serine/threonine-kinase 16	25.7672	26.1221	26.3877	25.9453	25.9787	25.1341	25.7672	26.1221	26.3877	25.9453	25.9787	25.1341	5	24.2	45.993	0	13.111	14
LOC_Os09g07300.1	B9G2A8	BIG	26.5083	26.3581	26.4277	27.2012	27.2736	27.129	26.5083	26.3581	26.4277	27.2012	27.2736	27.129	12	4	486.31	0	22.633	22
LOC_Os09g07350.1	Q6K489	fasciclin-like arabinogalactan 8 precursor	27.1678	26.6464	26.9634	25.7817	25.6701	26.2173	27.1678	26.6464	26.9634	25.7817	25.6701	26.2173	4	17.7	42.426	0	30.723	14
LOC_Os09g07510.2	Q6K4K9	HEAT repeat family protein	29.799	29.6704	29.8343	29.965	29.9649	29.5689	29.799	29.6704	29.8343	29.965	29.9649	29.5689	11	30.7	65.7	0	165.49	59
LOC_Os09g07660.2	Q6K2A4	ELMO/CED-12 family protein	25.5184	25.5795	25.587	NaN	NaN	NaN	25.5184	25.5795	25.587	22.9139	23.0353	23.6781	3	5.9	80.7	0	20.847	4
LOC_Os09g07830.3	Q6K3Z3	acetyl-CoA acetyltransferase	25.5001	25.6121	25.4011	25.053	24.7175	24.863	25.5001	25.6121	25.4011	25.053	24.7175	24.863	3	17	34.217	0	17.31	12
LOC_Os09g08880.1	Q7DNB0	ATP synthase like protein	33.9267	33.8379	33.7719	28.0954	28.3265	28.6329	33.9267	33.8379	33.7719	28.0954	28.3265	28.6329	3	33.5	31.763	0	62.078	35
LOC_Os09g08910.1	Q67TM4	ATP synthase	33.0611	33.0396	33.0779	34.039	34.0753	33.9332	33.0611	33.0396	33.0779	34.039	34.0753	33.9332	12	36.9	55.325	0	282.86	182
LOC_Os09g09320.2	Q67TV4	nuclear transport factor	27.8808	27.7906	27.7684	27.2464	27.1125	27.3944	27.8808	27.7906	27.7684	27.2464	27.1125	27.3944	4	18.1	23.603	0	34.768	14
LOC_Os09g09790.1	Q6K258	Fe-S metabolism associated domain containing protein	26.0577	26.0136	26.4118	26.4485	26.2638	26.3736	26.0577	26.0136	26.4118	26.4485	26.2638	26.3736	5	21.6	38.718	0	13.522	12
LOC_Os09g10690.1	Q6H5H8	expressed protein	25.5966	25.3872	25.516	26.5514	26.3429	26.4527	25.5966	25.3872	25.516	26.5514	26.3429	26.4527	3	16.1	27.835	0	14.24	13
LOC_Os09g10750.1	Q6H444	rhodanese-like	31.6738	31.6804	31.6916	29.4147	29.1833	29.5358	31.6738	31.6804	31.6916	29.4147	29.1833	29.5358	12	46.9	25.819	0	135.21	54
LOC_Os09g10760.1	Q6H443	RNA recognition motif containing protein	27.5718	27.326	27.3632	28.8638	28.7989	28.9153	27.5718	27.326	27.3632	28.8638	28.7989	28.9153	5	31	26.681	0	23.345	14
LOC_Os10g23100.1	Q338Z5	ras-related protein	26.413	26.6469	26.4054	26.3281	NaN	26.2727	26.413	26.6469	26.4054	26.3281	23.3742	26.2727	2	14.8	23.812	0	3.4037	7
LOC_Os09g12290.1	Q69LG7	bifunctional aspartokinase/homoserine dehydrogenase	26.3529	26.1782	26.0946	26.1219	25.9547	26.1027	26.3529	26.1782	26.0946	26.1219	25.9547	26.1027	6	9.6	99.663	0	16.827	13
LOC_Os09g12570.1	Q69TB0	ubiquitin-conjugating enzyme	NaN	NaN	NaN	25.5757	25.3684	25.5501	24.3717	24.4134	24.5543	25.5757	25.3684	25.5501	1	22.3	16.7	0	13.774	5
LOC_Os09g12600.2	Q69VR7	phosphate/phosphate translocator	28.2826	NaN	28.3214	27.7171	28.2309	28.1942	28.2826	22.562	28.3214	27.7171	28.2309	28.1942	1	3.8	39.542	0	16.195	11
LOC_Os09g14510.3	B7EK64	peroxin-3 family protein	25.1248	25.4029	25.1577	25.8607	NaN	25.6818	25.1248	25.4029	25.1577	25.8607	24.627	25.6818	2	9.4	29.844	0	5.2762	9
LOC_Os09g16330.2	A3BXL8	pleiotropic drug resistance protein	26.447	26.6832	26.7609	28.4308	28.3759	28.4435	26.447	26.6832	26.7609	28.4308	28.3759	28.4435	7	7.3	162.73	0	33.644	34
LOC_Os09g17329.1	Q0J2H4	expressed protein;LOC_Os09g17329.2 LOC_Os09g17329.2	28.5279	28.5022	28.4241	28.6891	28.7452	28.7316	28.5279	28.5022	28.4241	28.6891	28.7452	28.7316	10	20.6	79.121	0	88.233	37
LOC_Os09g17740.1	P12330	chlorophyll A-B binding protein	35.9935	35.9105	36.2613	34.1188	33.7372	33.4942	35.9935	35.9105	36.2613	34.1188	33.7372	33.4942	3	58.1	28.014	0	323.31	195
LOC_Os09g17760.1	Q6ES98	expressed protein	26.2637	26.2963	26.1319	26.301	26.4228	26.1028	26.2637	26.2963	26.1319	26.301	26.4228	26.1028	7	9.9	108.05	0	16.071	22
LOC_Os09g17840.1	Q6ES11	transport Sec61 subunit alpha	28.0811	28.3103	28.2168	27.8297	28.0034	27.9019	28.0811	28.3103	28.2168	27.8297	28.0034	27.9019	5	11.8	53.379	0	21.815	15
LOC_Os09g19734.3	Q6K548	isochorismate synthase 1	31.4023	31.1934	31.18	32.6373	32.6593	32.6421	31.4023	31.1934	31.18	32.6373	32.6593	32.6421	10	43.4	29.219	0	183.33	133
LOC_Os09g20430.1	Q6H4G4	SCO1 homolog	25.1522	25.2382	25.4109	25.6356	25.9238	26.0681	25.1522	25.2382	25.4109	25.6356	25.9238	26.0681	2	7.4	31.8	0	4.0709	8
LOC_Os09g20660.2	Q6H4I2	UPF0041 domain containing protein	27.0178	26.8153	26.7888	28.7004	28.8956	28.9381	27.0178	26.8153	26.7888	28.7004	28.8956	28.9381	2	18.8	10.687	0	5.6197	10
LOC_Os09g21210.1	Q6H5B5	beta-glucan-binding 4	24.4499	24.4555	NaN	26.7253	26.8956	26.7634	24.4499	24.4555	22.8414	26.7253	26.8956	26.7634	4	9.1	81.33	0	15.313	14
LOC_Os09g21230.4	A3BYC3	AMP-binding enzyme	NaN	NaN	NaN	24.8429	24.9494	24.9242	23.3872	23.525	24.0925	24.8429	24.9494	24.9242	3	6.3	58.977	0	8.1717	4
[truncated: 387 more rows]

## Sheet: Table S2
Table S2. Identification of differentially modulated proteins by comparison between two different microsomal protein extraction methods
Protein Accession No	Uniprot Accession No	KEGG IDs	Protein description	PME rep_1	PME rep_2	PME rep_3	MME rep_1	MME rep_2	MME rep_3	Cluster	Unique peptides	Sequence coverage [%]	Mol. weight [kDa]	Q-value	Score	MS/MS count	FC	(-) Log Student's T-test p-value
LOC_Os02g52860.1	O80414	osa:4330845	phosphate carrier protein	29.4604	29.5106	29.4164	30.758	30.0433	30.3263	Cluster_1	3	22.6	38.959	0	9.835	25	-1.88348	1.91797
LOC_Os04g02670.1	Q7XT14	osa:4334952	ATP synthase subunit e, mitochondrial	27.0778	27.0529	26.9621	28.0049	27.5331	27.5789	Cluster_1	2	61.5	5.2901	0	32.168	15	-1.59628	1.92325
LOC_Os07g32460.1	Q8LIJ9	osa:4343341	src homology-3 domain 3	25.0141	25.1091	24.7759	25.8595	25.3698	25.4507	Cluster_1	3	11.8	38.891	0	15.624	9	-1.50907	1.51506
LOC_Os03g25970.2	Q10KN9	osa:4332959	KH domain-containing protein	25.3263	24.9582	25.3371	25.9405	25.5879	26.0715	Cluster_1	5	17.2	57.843	0	25.848	13	-1.57947	1.58715
LOC_Os01g27040.1	Q7G8Y3	osa:4325731	chromatin-remodeling complex ATPase chain	23.6489	23.4233	23.9514	24.5328	24.0952	24.4944	Cluster_1	2	2.1	127.63	0	7.9636	10	-1.62405	1.55383
LOC_Os03g10060.1	Q10QH0	-	Chloroplast 30S ribosomal protein S10, putative, expressed (Os03g0196800 protein) (cDNA clone:001-017-A12, full insert sequence) (cDNA clone:006-202-F06, full insert sequence)	23.6552	23.0753	24.6698	25.731	25.2209	25.932	Cluster_1	3	21.6	19.986	0	6.0083	4	-3.55009	1.63187
LOC_Os11g12810.1	Q53JI9	osa:4350151	sucrose-phosphate synthase	27.007	27.5827	27.3612	28.2032	28.1417	27.7622	Cluster_1	10	13.6	119.3	0	45.735	38	-1.64573	1.52829
LOC_Os05g25210.1	Q5W6X4	osa:4338392	expressed protein	26.0415	26.5281	26.174	27.595	27.6229	26.9895	Cluster_1	6	17.1	51.122	0	13.943	17	-2.22622	1.98931
LOC_Os12g01140.1	Q2QYY8	osa:4351240	AGC_PVPK_like_kin82y.2 - ACG kinases include homologs to PKA	24.468	25.1392	25.0247	26.3971	26.4798	25.6294	Cluster_1	4	5.8	103.38	0	8.716	9	-2.44775	1.71413
LOC_Os10g26640.1	Q7XEU6	osa:4348587	LYR motif containing protein	25.7847	25.9687	26.1131	26.7907	26.3312	26.749	Cluster_1	4	36.7	10.053	0	13.583	11	-1.58899	1.7272
LOC_Os02g01960.1	Q6Z901	osa:4328037	tetratricopeptide repeat domain containing protein	25.5296	25.6876	26.0371	26.4968	26.2612	26.4248	Cluster_1	5	11.5	64.944	0	10.247	10	-1.56136	1.75146
LOC_Os02g48900.2	Q6Z670	-	aspartic proteinase nepenthesin-1 precursor	28.4115	28.6391	28.7538	29.264	29.0883	29.2248	Cluster_1	7	37.5	34.409	0	24.162	35	-1.50617	2.18343
LOC_Os09g36920.1	A0A0P0XR18	osa:4347728	la domain containing protein	23.3449	24.362	24.0321	25.586	25.2699	25.4493	Cluster_1	2	11.9	52.593	0	3.3321	4	-2.87208	2.08169
LOC_Os04g51150.1	O82807	osa:4336874	Ubiquinol oxidase 1a, mitochondrial (EC 1.10.3.11) (Alternative oxidase 1a) (OsAOX1A)	23.5653	25.2113	24.4149	26.4923	26.3634	26.6134	Cluster_1	2	7.5	37.136	0	6.8694	9	-4.2649	1.9163
LOC_Os01g21320.1	Q75PK7	osa:4327295	NAD dependent epimerase/dehydratase family domain containing protein	24.3039	25.1843	24.7466	26.2984	26.0136	26.2731	Cluster_1	1	27.5	46.445	0	6.986	7	-2.7323	2.23643
LOC_Os01g72790.1	Q5JK68	-	cyclin-dependent kinase	25.5934	25.9086	25.8132	26.3634	26.2944	26.4838	Cluster_1	3	7.8	56.825	0	6.8441	14	-1.52501	2.30464
LOC_Os12g24020.2	Q2QSI2	osa:4352104	rhodanese-like domain containing protein	22.8765	24.8829	24.2456	26.619	26.5943	26.5394	Cluster_1	2	16.4	15.11	0	5.0199	4	-5.98995	1.91847
LOC_Os10g25320.3	Q7XEY8	-	initiation factor 2 subunit family domain containing protein	22.7365	23.695	23.8924	25.2381	25.3278	25.3572	Cluster_1	2	9.7	39.868	0	7.7434	13	-3.6463	2.18664
LOC_Os07g48244.1	Q0D3L5	-	ubiquinol-cytochrome c reductase complex 6.7 kDa protein	28.8599	29.3204	29.2727	29.7687	29.7314	29.8101	Cluster_1	2	34.4	6.7457	0	17.874	6	-1.53587	1.85802
LOC_Os03g17180.1	Q10N72	osa:4332438	ABC transporter family protein, putative, expressed (Os03g0280000 protein)	27.5108	27.841	27.8047	28.3509	28.3688	28.4382	Cluster_1	13	15.9	155.64	0	82.321	43	-1.5879	2.45869
LOC_Os07g01560.1	Q7EZD7	osa:4342198	Sugar transport protein MST3 (Monosaccharide transporter 3) (OsMST3) (Sugar:proton symporter MST3)	22.9963	25.0683	24.7732	27.6865	27.7761	27.6242	Cluster_1	3	6	56.764	0	34.677	10	-10.6761	2.20589
LOC_Os07g42940.4	B7EIN5	-	CAMK_CAMK_like.7 - CAMK includes calcium/calmodulin depedent kinases	23.5031	24.4005	24.5889	25.405	25.612	25.4409	Cluster_1	3	9.5	29.669	0	8.1856	5	-2.49981	1.74721
LOC_Os06g02130.1	Q9LI02	osa:4339891	G-alpha subunit	23.3194	24.5841	24.539	26.0008	25.8577	25.8381	Cluster_1	2	3	97.828	0	4.9392	7	-3.36683	1.86192
LOC_Os04g37904.2	Q7XQU7	osa:4336006	phosphatase 2C	23.3671	25.2033	25.4027	26.9838	26.7907	26.9566	Cluster_1	4	22.3	30.881	0	26.262	11	-4.76557	1.5889
LOC_Os01g56140.1	Q8LIX8	osa:4325497	expressed protein	23.8821	24.4849	24.6463	25.2681	25.1716	25.201	Cluster_1	2	2	113.61	0	8.4211	5	-1.83506	1.69561
LOC_Os01g40420.1	Q0JLN6	osa:4327659	CBS domain containing membrane protein	24.0242	25.2186	25.201	26.2055	26.2741	26.2698	Cluster_1	3	8.9	47.873	0	5.6863	6	-2.7042	1.65276
LOC_Os01g46810.1	A0A0N7KDF9	-	viral A-type inclusion repeat containing protein	23.4233	24.299	24.4196	24.9783	25.1195	25.1474	Cluster_1	3	3.4	172.15	0	6.6667	6	-2.04829	1.50341
LOC_Os01g13420.1	Q9LDX7	osa:4327778	SOUL heme-binding protein	24.2804	24.6012	25.2737	25.9544	26.2698	26.4752	Cluster_1	3	17.8	23.878	0	28.68	10	-2.85733	1.9976
LOC_Os03g14800.4	Q10P01	osa:4332274	serine palmitoyltransferase 1	25.4962	25.4859	25.8199	25.9333	26.2931	26.3947	Cluster_1	5	18.6	52.426	0	12.727	13	-1.52244	1.56837
LOC_Os10g11110.1	Q7G4Q1	osa:4348229	expressed protein;LOC_Os08g01110.1 LOC_Os08g01110.1	23.1753	22.8436	24.5841	25.5535	25.5023	25.4641	Cluster_1	3	11.5	50.877	0	8.349	11	-3.92393	1.67823
LOC_Os05g44360.2	A0A0P0WPW2	-	Dolichyl-diphosphooligosaccharide--protein glycotransferase (EC 2.4.99.18) (Fragment)	23.4776	23.0995	25.1448	26.1115	26.0544	25.9444	Cluster_1	3	8.8	62.534	0	11.163	11	-4.37557	1.55578
LOC_Os01g07780.1	Q94E65	osa:4327118	embryo-specific 3	23.2254	23.0035	26.7592	28.5008	28.5678	29.5528	Cluster_1	3	26.7	20.657	0	39.999	7	-23.3355	1.64189
LOC_Os03g51050.1	Q93VE2	-	peptide transporter PTR2	23.5284	23.1753	26.5293	28.3674	28.5573	28.4945	Cluster_1	5	13.7	65.613	0	34.928	13	-16.7031	1.72348
LOC_Os02g14430.1	Q6ER51	osa:4328841	peroxidase precursor	23.3902	22.7108	25.0871	26.6222	26.4595	26.2797	Cluster_1	3	22.6	34.427	0	10.938	6	-6.60913	1.72571
LOC_Os11g16320.1	Q53LT9	osa:4350240	expressed protein	27.3399	27.499	27.6865	28.1196	28.2086	27.9842	Cluster_1	6	29.2	32.072	0	44.552	20	-1.51116	2.12046
LOC_Os09g02284.1	Q6YX88	osa:4346392	DNA-directed RNA polymerase subunit	23.9456	24.0073	24.7108	25.8227	25.7542	25.2478	Cluster_1	2	11.2	36.46	0	27.151	5	-2.61531	1.98069
LOC_Os05g05830.1	Q5WN02	osa:4337829	bifunctional folD	29.5695	29.5806	29.8923	30.8354	30.7016	30.5776	Cluster_1	11	49	30.733	0	113.53	47	-2.0337	2.86074
LOC_Os02g47320.1	Q6ZHJ9	-	vacuolar ATPase G subunit	23.7333	23.7679	24.5228	26.4694	26.0879	25.678	Cluster_1	1	8.2	21.783	0.0022284	2.2427	3	-4.20019	2.41431
LOC_Os03g48140.1	A0A0P0W1J8	-	myosin	26.5216	26.6376	26.7784	27.4133	27.4042	27.1355	Cluster_1	7	6.8	178.21	0	29.169	19	-1.5931	2.33423
LOC_Os08g02640.5	Q9S827	osa:4344541	succinate dehydrogenase iron-sulfur subunit 2	22.5348	23.6699	24.9365	26.4884	26.4566	26.3504	Cluster_1	5	20.3	31.118	0	10.462	9	-6.58004	1.76014
LOC_Os07g31380.1	Q7F190	osa:4343294	NAD-dependent malic enzyme	22.2814	23.3902	23.9339	25.2918	25.3336	25.1321	Cluster_1	3	7.2	68.942	0	13.007	4	-4.14301	1.8579
LOC_Os03g52239.1	Q10DD6	osa:9266975	Homeodomain protein JUBEL1, putative, expressed (Os03g0732100 protein)	23.5484	24.0354	24.4632	25.2572	25.2113	25.296	Cluster_1	3	6.6	81.918	0	7.9699	6	-2.36063	2.02102
LOC_Os04g45970.1	Q7XN06	-	glutamate dehydrogenase protein	23.1147	24.1828	24.7624	25.8355	25.9722	25.962	Cluster_1	2	8	44.622	0	15.703	7	-3.74066	1.76614
LOC_Os04g44530.8	Q7XKI9	osa:4336460	expressed protein;LOC_Os04g44530.7 LOC_Os04g44530.7	22.3616	22.9704	24.75	26.2779	26.2176	26.0544	Cluster_1	3	9.2	40.909	0	11.007	6	-7.07459	1.7641
LOC_Os05g03920.1	Q65XU5	-	TKL_IRAK_DUF26-lf.3 - DUF26 kinases have homology to DUF26 containing loci	22.7108	23.0153	24.0002	24.864	25.1558	24.8682	Cluster_1	3	5.1	71.796	0	4.4025	5	-3.29564	1.89513
LOC_Os08g44770.1	P93407	osa:4346329	copper/zinc superoxide dismutase	26.2359	26.3866	26.7225	27.1581	27.2319	27.3017	Cluster_1	3	28.4	21.301	0	19.077	16	-1.71983	2.19402
LOC_Os07g10840.1	Q6ZLJ9	osa:4342703	uncharacterized glycosyltransferase	23.0035	23.3778	24.5649	26.2514	26.4268	26.2984	Cluster_1	3	8.5	81.999	0	27.07	10	-6.39436	2.31638
LOC_Os08g01760.1	Q6ZC70	osa:4344469	dehydrogenase	25.6679	25.7183	26.0952	26.745	26.8018	26.7883	Cluster_1	3	8.1	44.9	0	9.0516	10	-1.9335	2.65888
LOC_Os07g48810.1	Q69WA8	osa:4344347	parvulin-type peptidyl prolyl cis/trans isomerase	26.4055	26.7188	26.8828	27.2355	27.5687	27.3565	Cluster_1	6	20.9	33.144	0	14.784	19	-1.64474	1.86662
LOC_Os05g33620.1	B9FID6	-	expressed protein	26.6296	26.4248	26.7743	27.3526	27.3948	27.1694	Cluster_1	6	23.2	38.542	0	25.63	15	-1.62007	2.32121
LOC_Os04g38480.2	Q7XV05	osa:4336035	BRASSINOSTEROID INSENSITIVE 1-associated receptor kinase 1 precursor	26.618	26.43	26.5438	27.499	27.3227	27.0163	Cluster_1	3	7.8	65.818	0	8.3876	10	-1.68032	2.1102
LOC_Os07g44860.1	Q8H5P9	-	gibberellin receptor GID1L2	26.0733	25.6884	26.2321	27.4965	27.4329	26.7369	Cluster_1	3	22	37.014	0	15.894	15	-2.33626	1.86082
LOC_Os06g51510.1	Q5Z402	osa:4342159	Clathrin light chain 2	24.8534	24.1304	24.2838	25.8492	25.6639	25.5339	Cluster_1	2	13.1	31.29	0	10.221	13	-2.39459	2.21219
LOC_Os01g73310.1	Q94DL4	osa:9269066	actin	25.4936	24.6559	24.6169	26.2661	25.9352	25.7847	Cluster_1	2	48	41.727	0	6.9311	6	-2.10416	1.54839
LOC_Os01g03650.1	Q5ZDZ8	osa:4325986	sufB/sufD domain containing protein	25.2113	23.383	23.8366	25.9593	26.2448	25.8199	Cluster_1	3	8.3	51.614	0	5.1992	6	-3.64106	1.52684
LOC_Os01g38229.2	Q657L8	-	peptidyl-prolyl isomerase	24.4849	23.92	23.9873	25.0516	24.9422	24.9256	Cluster_1	2	3.5	72.873	0	3.9928	3	-1.79303	2.00416
LOC_Os10g42190.2	Q8S7M7	osa:4349464	leucine rich repeat containing protein	25.9893	24.6169	24.2559	27.5527	27.7493	27.7125	Cluster_1	8	18	59.204	0	47.432	17	-6.57717	2.15997
LOC_Os09g38550.5	Q653S3	osa:4347831	phosphatase 2C	24.4211	23.2254	23.3379	25.4551	25.2866	25.5837	Cluster_1	2	7.4	38.466	0	5.5813	4	-3.43498	1.98417
LOC_Os07g33780.1	B9FXK4	-	pleiotropic drug resistance 5	25.3752	24.4377	24.395	25.9995	25.8006	26.0053	Cluster_1	3	10.7	66.06	0	22.251	6	-2.29613	1.66937
LOC_Os03g21380.2	Q10LX4	osa:4332731	OsCML27 - Calmodulin-related calcium sensor protein	24.1502	22.9963	22.8049	25.5189	25.5961	25.421	Cluster_1	2	17.4	20.344	0	9.6511	4	-4.57836	2.18183
LOC_Os05g02520.2	Q65XA1	osa:4337621	cupin domain containing protein	24.1393	23.4894	23.1643	24.9459	24.7466	24.8228	Cluster_1	2	6.9	35.138	0	3.6292	3	-2.36327	1.87829
LOC_Os12g01260.1	Q2QYX6	osa:9269540	transport Sec61 subunit beta	28.1943	27.8978	27.9536	28.8998	28.6352	28.9947	Cluster_1	2	28	10.674	0	16.985	13	-1.77528	2.3782
LOC_Os09g38390.1	A3C1D8	osa:4347818	octicosapeptide/Phox/Bem1p	27.4053	27.2685	27.3426	28.1523	27.9617	28.2125	Cluster_1	7	17.3	77.601	0	54.388	28	-1.70529	3.0783
LOC_Os07g15880.1	Q7EYR6	osa:4342874	mitochondrial prohibitin complex 2	30.1264	29.9715	30.0363	30.9271	30.6337	31.0009	Cluster_1	6	45.3	31.954	0	95.586	63	-1.75219	2.58788
LOC_Os04g44430.1	B9FG86	-	transporter	26.511	26.3024	26.3649	27.1694	26.9588	27.3455	Cluster_1	3	9.9	59.886	0	91.787	13	-1.69946	2.40822
LOC_Os01g16220.1	Q5NBL8	osa:4324382	Sad1 / UNC-like C-terminal domain containing protein	25.4753	25.3774	25.3899	26.1392	25.8543	26.0879	Cluster_1	5	12.7	48.429	0	20.269	14	-1.52939	2.56341
LOC_Os03g57340.1	Q6F3B0	osa:4334359	chaperone dnaJ	28.1472	27.9131	27.8078	29.0995	28.6474	29.0378	Cluster_1	5	19.4	46.69	0	14.83	17	-1.96178	2.3026
LOC_Os06g11800.1	Q67VZ1	osa:4340522	annexin	23.2876	22.8273	23.6613	24.1204	24.0417	24.4045	Cluster_1	2	8.5	35.72	0	7.0495	3	-1.90546	1.60692
LOC_Os04g57810.3	Q7XQ97	osa:4337380	GA18008-PA	25.2303	24.5798	25.5053	26.0629	25.9149	26.0557	Cluster_1	2	17.2	19.437	0	13.339	7	-1.87393	1.50428
LOC_Os03g08860.1	Q8H7P4	osa:4331881	GRAM domain containing protein	24.0091	23.3671	24.299	25.1119	25.1448	25.2416	Cluster_1	2	9.8	28.374	0	8.6303	6	-2.41887	1.99302
LOC_Os01g59600.2	Q9LSU0	osa:4327357	peptidase	23.9712	22.9617	24.6271	26.2944	26.2661	26.3135	Cluster_1	2	7.6	27.238	0	4.0201	7	-5.41884	2.13513
LOC_Os02g03540.1	Q6Z2L5	osa:4328168	phosphoribosyl transferase	25.768	25.4174	26.0053	26.3298	26.3947	26.4939	Cluster_1	2	9.6	42.925	0	13.994	13	-1.59761	1.72356
LOC_Os02g38200.1	Q6ZI55	osa:4329858	NAD-dependent isocitrate dehydrogenase c2 (Os02g0595500 protein)	26.9584	26.4396	27.0438	27.8202	27.7561	27.868	Cluster_1	4	24.9	40.628	0	22.835	20	-2.00108	2.19342
LOC_Os08g06250.1	Q7EZC8	osa:4344712	tetraspanin family protein	24.9459	23.842	24.8829	26.4055	26.1514	26.3545	Cluster_1	3	11.5	30.664	0	8.3804	8	-3.35626	2.0534
LOC_Os04g26910.1	Q7XT99	osa:4335512	oxidoreductase	24.6323	23.8959	24.6868	25.5339	25.6395	25.7466	Cluster_1	3	10.8	38.233	0	10.841	12	-2.35377	2.0337
LOC_Os04g52450.2	Q7XN11	osa:4336983	aminotransferase	25.2186	22.6881	24.5549	26.9862	26.9978	26.7669	Cluster_1	2	12.4	47.057	0	21.931	11	-6.78839	1.65436
LOC_Os02g04100.1	P52428	osa:4328215	peptidase	24.3479	22.4197	24.2911	26.6009	26.6854	26.6048	Cluster_1	2	11.9	29.63	0	20.263	6	-7.69611	2.01272
LOC_Os03g11360.3	B9F655	osa:4332036	leucine rich repeat containing protein	24.0002	22.3164	23.6289	25.3863	25.4663	25.6395	Cluster_1	3	25.1	24.187	0	6.6646	7	-4.53843	1.87297
LOC_Os01g51170.1	Q8LR54	osa:4327681	glycylpeptide N-tetradecanoyltransferase 1	23.6164	22.7791	23.2254	24.4504	24.389	24.2838	Cluster_1	3	9.2	49.709	0	4.9951	5	-2.24606	2.04124
LOC_Os07g26940.2	Q7EY59	osa:4343133	ORM1	24.7842	24.3801	24.6323	25.3287	25.2796	25.2077	Cluster_1	2	26.9	13.805	0	5.587	6	-1.59451	2.2658
LOC_Os02g13560.4	Q6H536	osa:4328798	transporter family protein	24.0354	23.1424	24.1393	25.9893	26.1417	25.9149	Cluster_1	3	6.4	80.108	0	11.342	6	-4.73356	2.64412
LOC_Os11g07850.1	Q2R9R4	-	Protein-tyrosine phosphatase domain containing protein	24.2911	23.8007	24.3442	25.3899	25.4257	25.3535	Cluster_1	3	8.8	43.951	0	5.006	8	-2.3691	2.69178
LOC_Os07g42810.2	Q7XI39	osa:4343931	adaptor complexes medium subunit family domain containing protein	25.8312	25.5359	25.8872	26.8121	26.6674	26.689	Cluster_1	6	14.4	50.646	0	80.037	17	-1.96072	2.92663
LOC_Os06g07978.1	P0DKK3	osa:107278560	peptidase	24.1891	23.4127	24.2705	25.8887	25.7352	25.851	Cluster_1	2	10	27.044	0	6.8685	3	-3.64909	2.59659
LOC_Os04g52840.1	Q7XTU1	osa:4337021	tyrosine kinase domain containing protein	25.538	24.9135	25.6423	27.4271	27.3017	27.3227	Cluster_1	2	14.2	41.659	0	11.523	15	-3.96104	2.9986
LOC_Os03g07190.1	Q8S7U4	osa:4331752	expressed protein	24.6999	23.5811	25.0598	27.7323	27.6484	27.7334	Cluster_1	5	23	28.804	0	19.805	15	-9.56488	2.72822
LOC_Os03g32170.1	Q60DC5	osa:107275612	NAD dependent epimerase/dehydratase family protein	24.8113	24.2357	24.9135	26.5146	26.4143	26.6531	Cluster_1	2	6.6	44.045	0	5.9202	7	-3.66508	2.96663
LOC_Os07g18120.1	B9FWN0	-	aldehyde oxidase	24.864	24.3647	24.861	26.4541	26.4868	26.4314	Cluster_1	4	4.1	148.5	0	7.8672	7	-3.38902	3.34223
LOC_Os04g15690.1	Q7XNV4	osa:4335218	DSBA-like thioredoxin domain containing protein	23.9873	23.372	23.8593	25.9444	25.9067	25.7977	Cluster_1	1	7.1	24.858	0	3.8996	4	-4.41802	3.43144
LOC_Os07g05820.2	Q6YT73	osa:4342420	hydroxyacid oxidase 1	29.7939	29.5695	29.792	30.4482	30.4762	30.4286	Cluster_1	10	52.3	40.244	0	94.236	54	-1.66162	3.19387
LOC_Os02g33500.1	Q6ER90	osa:4329580	threonyl-tRNA synthetase	26.0664	25.4534	26.0474	27.4908	27.2371	27.5566	Cluster_1	8	13.8	76.937	0	28.495	20	-2.97403	2.66697
LOC_Os03g16690.1	Q10NC7	osa:4332402	oxysterol-binding protein	26.8383	26.5251	26.7118	27.3031	27.1963	27.3723	Cluster_1	6	18.8	51.806	0	21.425	14	-1.51448	2.33998
LOC_Os12g16720.1	Q2QUC5	osa:4351945	cytochrome P450 71A1	24.7295	22.9026	24.2199	27.5265	27.3465	27.5959	Cluster_1	4	11.5	57.764	0	18.636	8	-11.6232	2.52466
LOC_Os11g11960.1	F7J0N9	-	disease resistance RPM1	24.8485	23.7964	24.4902	26.3458	26.3799	26.3716	Cluster_1	4	6.4	94.635	0	8.1734	12	-3.96534	2.52219
LOC_Os10g34370.1	Q8W361	osa:4348938	expressed protein	24.2382	23.4068	24.0638	25.6754	25.3419	25.4877	Cluster_1	2	6.5	46.24	0	8.3465	5	-3.02878	2.38452
LOC_Os07g07410.2	Q69LD9	-	oxidoreductase	25.3296	23.4211	24.8913	28.33	28.4115	28.3896	Cluster_1	4	15.9	37.586	0	32.653	11	-14.2186	2.5709
LOC_Os06g07200.1	Q5VRF6	osa:4340257	syntaxin	24.0638	22.1114	23.7375	27.0501	27.1377	27.102	Cluster_1	5	16.7	34.648	0	20.741	11	-13.8556	2.48253
LOC_Os03g59320.1	Q84M38	osa:4334513	expressed protein	26.3578	25.8355	26.1776	27.1888	27.1144	27.0804	Cluster_1	2	13.3	22.226	0	34.943	10	-2.00588	2.51835
LOC_Os01g04330.1	Q5ZCK5	osa:4325693	OsCML16 - Calmodulin-related calcium sensor protein	24.8296	23.8593	24.4546	26.6754	26.5293	26.7907	Cluster_1	3	26	19.263	0	6.7923	6	-4.87014	2.83835
LOC_Os01g32780.1	Q94E74	osa:4324029	universal stress domain containing protein	24.0942	22.174	23.4837	28.0308	27.9384	27.9725	Cluster_1	1	9.6	17.922	0	4.8835	10	-26.5374	2.94725
LOC_Os10g35720.1	Q0IWL9	-	OsGrx_S17 - glutaredoxin subgroup II	27.0029	26.6117	26.771	27.6065	27.4224	27.5663	Cluster_1	5	18.5	53.154	0	20.662	24	-1.6662	2.36238
LOC_Os04g05080.1	Q6KAA4	osa:4331207	V-type proton ATPase subunit F	24.994	23.995	24.4582	26.9792	26.7849	26.8049	Cluster_1	2	25.5	5.8596	0	7.2947	7	-5.18356	2.88691
LOC_Os04g31340.1	Q7XVC0	osa:4335640	CBS domain containing membrane protein	25.3846	25.0979	25.263	26.1334	26.036	26.074	Cluster_1	2	4.7	46.855	0	3.9018	11	-1.78093	3.16115
LOC_Os03g04440.2	Q10S29	osa:4331549	expressed protein;LOC_Os03g04440.1 LOC_Os03g04440.1	24.8036	24.5166	24.8973	25.5934	25.3919	25.5595	Cluster_1	3	21.7	23.479	0	20.25	9	-1.7121	2.39778
LOC_Os07g08170.1	B7FAF4	osa:4342553	RuvB-like helicase (EC 3.6.4.12)	27.1355	26.9522	27.0873	27.8445	27.5761	27.7493	Cluster_1	7	22	49.611	0	30.078	24	-1.58553	2.64522
LOC_Os02g33610.2	B9F0F0	-	metallo-beta-lactamase	25.5595	25.3473	25.678	26.5819	26.4102	26.6472	Cluster_1	5	10.2	77.801	0	10.569	13	-2.02533	2.97834
LOC_Os06g09688.1	Q69K73	-	chaperonin	27.2227	27.0718	27.1683	27.902	27.7502	27.8633	Cluster_1	5	33.3	23.102	0	53.788	17	-1.60692	3.37864
LOC_Os04g32020.1	A0A0P0W9W2	osa:4335673	2-oxoglutarate dehydrogenase E1 component	26.7369	26.4777	26.7686	28.2525	28	28.0113	Cluster_1	6	15	103.25	0	37.126	19	-2.68859	3.49325
LOC_Os03g22950.1	Q10LF1	osa:4332854	acyl carrier protein	27.1077	26.8716	27.1694	28.6902	28.5008	28.5983	Cluster_1	2	18.5	14.77	0	6.0655	13	-2.92185	3.89295
LOC_Os03g04410.1	Q10S34	osa:4331547	aconitate hydratase protein	26.02	25.7727	25.8981	26.9509	26.8211	26.924	Cluster_1	8	12.6	106.3	0	16.183	21	-2.0024	3.59654
LOC_Os03g13730.1	Q10PB3	osa:4332203	Translocase of chloroplast (EC 3.6.5.-)	29.7267	29.6119	29.7267	30.4089	30.3385	30.3521	Cluster_1	7	30	36.28	0	118.79	42	-1.60002	3.98764
LOC_Os09g10690.1	Q6H5H8	osa:107276982	expressed protein	25.7542	25.5879	25.7325	26.408	26.174	26.2635	Cluster_1	3	16.1	27.835	0	14.24	13	-1.50557	2.62992
LOC_Os08g01180.1	Q6Z1Y4	osa:4344424	Nicalin	28.2687	28.0418	28.3802	29.0883	28.8034	28.8422	Cluster_1	8	21.3	60.656	0	67.539	35	-1.60332	2.15464
LOC_Os03g38000.2	Q75G91	osa:4333308	40S ribosomal protein S3	28.717	28.5243	28.6082	29.3815	29.1415	29.2065	Cluster_1	7	40	22.818	0	89.847	29	-1.544	2.63593
LOC_Os03g55570.1	Q10EQ6	osa:107275975	SWIB complex BAF60b domain-containing protein, putative, expressed	24.3726	24.0002	24.389	25.538	25.3473	25.2186	Cluster_1	2	7.8	37.513	0	14.245	7	-2.16445	2.67883
LOC_Os03g58970.1	Q75HJ8	-	expressed protein;LOC_Os03g58970.2 LOC_Os03g58970.2	26.2258	25.6591	26.0701	26.969	26.58	26.7442	Cluster_1	4	10.8	70.592	0	23.891	17	-1.71644	1.7322
LOC_Os07g34520.3	A0A0A0QMT5	osa:4343441	isocitrate lyase	25.8111	24.0942	24.5938	28.1095	29.0321	28.9253	Cluster_1	7	21.1	60.576	0	46.754	21	-14.4796	2.55545
LOC_Os05g38170.1	Q60EM2	osa:4338981	phosphoribosyl transferase	26.9056	26.4939	26.6579	27.4562	27.5746	27.6601	Cluster_1	6	25.6	31.628	0	31.762	19	-1.83761	2.55811
LOC_Os04g52460.1	Q7XN10	-	retrotransposon protein	23.92	23.0432	22.8629	25.1091	25.4507	25.5395	Cluster_1	3	2.8	205.02	0	4.1856	6	-4.26062	2.39559
LOC_Os01g51700.1	Q5JLU1	osa:4325946	ras-related protein	27.4893	27.1229	27.2319	27.9806	28.0222	28.1095	Cluster_1	3	39.6	23.261	0	18.892	18	-1.68884	2.5564
LOC_Os04g22360.1	Q7XRQ7	osa:4335397	DUF647 domain containing protein	24.2054	23.5915	23.444	25.1956	25.3387	25.4174	Cluster_1	2	4.7	63.227	0	8.7235	8	-2.96962	2.5363
LOC_Os11g38670.1	Q2R1M8	osa:4350856	DEAD-box ATP-dependent RNA helicase	27.3345	27.2371	27.2925	27.8047	27.8906	27.9872	Cluster_1	5	14.3	65.987	0	30.244	19	-1.52216	3.27393
LOC_Os10g30870.1	Q7XDY9	osa:4348745	expressed protein	28.3802	28.1821	28.3485	28.8277	28.9394	28.9577	Cluster_1	10	28.4	51.559	0	167.8	39	-1.52067	2.92105
LOC_Os09g33810.5	Q69IN8	osa:4347554	ankyrin repeat domain containing protein	24.0712	23.6164	23.9172	25.1912	25.5324	25.5982	Cluster_1	2	12.1	23.04	0	3.8883	7	-2.97381	2.99019
LOC_Os04g57440.1	A0A0P0WGF4	-	oryzain beta chain precursor	26.8246	26.6824	26.8211	27.167	27.4069	27.5265	Cluster_1	3	7.9	49.798	0	9.0364	10	-1.50608	2.15925
LOC_Os04g50860.1	Q0JAJ2	osa:4336846	expressed protein	27.5527	27.4042	27.4578	27.9757	28.1482	28.1417	Cluster_1	5	21	45.306	0	38.292	25	-1.53365	3.00956
LOC_Os03g24380.1	Q10L56	osa:4332876	glutathione peroxidase domain containing protein	27.5003	27.385	27.4354	28.1262	28.3139	28.4055	Cluster_1	5	21.9	19.234	0	15.838	12	-1.79202	3.16176
LOC_Os03g32314.1	Q75KD7	osa:4333201	Allene oxide cyclase, chloroplastic (OsAOC) (EC 5.3.99.6) (Protein COLEOPTILE PHOTOMORPHOGENESIS 2) (Protein HEBIBA)	25.8256	25.5645	25.586	26.0858	26.3504	26.43	Cluster_1	3	12.9	26.05	0	4.6832	8	-1.54762	2.03726
LOC_Os05g31140.3	Q75K72	osa:4338611	glycosyl hydrolases family 17	25.716	24.3039	25.2381	26.9566	27.1808	27.5503	Cluster_1	4	20	31.337	0	41.144	19	-4.4175	2.05338
LOC_Os06g34790.1	Q5Z6T5	osa:4341223	DUF538 domain containing protein	27.1935	26.433	26.8288	27.5912	27.7334	28.2415	Cluster_1	4	37	17.622	0	10.193	12	-2.0519	1.60856
LOC_Os06g14324.2	A3BAC3	-	caleosin related protein	24.6463	23.1374	23.7105	25.2033	25.2349	25.673	Cluster_1	2	11.9	21.244	0	4.3404	4	-2.90595	1.52734
LOC_Os03g22120.2	Q10LP3	-	sucrose synthase	24.7189	24.4149	24.6539	25.5023	25.5745	26.3695	Cluster_1	3	7.7	76.853	0	7.1752	8	-2.3287	1.85119
LOC_Os01g15600.1	A0A0P0V197	osa:4325116	PUR ALPHA-1	28.0458	27.8651	28.1688	28.5678	28.5878	28.7932	Cluster_1	7	35.1	33.32	0	94.693	27	-1.54011	2.26519
LOC_Os06g14370.2	Q652U4	osa:4340665	caleosin related protein	26.378	26.1998	26.4248	26.8541	27.0923	27.2712	Cluster_1	5	25.6	23.636	0	13.236	18	-1.66824	2.22018
LOC_Os03g11900.1	Q10PW9	osa:4332079	Sugar transport protein MST4 (Monosaccharide transporter 4) (OsMST4) (Sugar:proton symporter MST4)	25.9544	25.5324	25.296	27.6316	29.5206	29.1135	Cluster_1	5	10.3	56.774	0	39.856	12	-8.94427	2.19228
LOC_Os09g26900.1	F5BCS3	osa:4347173	Copper transporter	27.216	27.1808	27.0668	28.1472	28.7932	28.9432	Cluster_1	2	21.5	15.779	0	14.334	9	-2.77668	2.39321
LOC_Os03g48710.1	Q851J4	-	expressed protein;LOC_Os03g48710.2 LOC_Os03g48710.2	24.9506	25.058	25.1119	25.957	27.1355	27.3589	Cluster_1	2	12.2	18.66	0	3.6416	6	-3.42712	1.81472
LOC_Os01g16530.1	Q0JNQ7	osa:4325168	OsClp1 - Putative Clp protease homologue	26.6719	26.5293	26.2984	26.9773	27.7572	27.9563	Cluster_1	3	12.4	32.259	0	36.178	8	-2.09035	1.54249
LOC_Os01g25330.3	Q5ZCR4	osa:4326281	SAC9	24.8886	24.9506	24.9398	25.4257	26.2767	26.2426	Cluster_1	3	3.5	117.75	0	5.6994	5	-2.07822	1.71327
LOC_Os06g07600.1	B9FRS2	-	uncharacterized glycosyltransferase	25.3863	25.508	25.4102	26.0395	26.2235	26.5005	Cluster_1	5	9.3	89.656	0	13.309	12	-1.76499	2.38248
LOC_Os09g33950.1	Q69IM6	osa:4347568	ferredoxin 1-like isoform 1	28.0901	28.1374	28.0806	29.3568	29.6119	30.0958	Cluster_1	3	17.1	17.146	0	40.145	18	-3.00107	2.72586
LOC_Os01g58580.1	Q8LJ88	osa:4327953	ICE-like protease p20 domain containing protein	27.0998	27.0961	26.8415	27.6448	27.6336	27.841	Cluster_1	5	23.7	45.885	0	18.137	23	-1.61779	2.50814
LOC_Os10g41410.2	Q7XC37	osa:4349403	nucleoside diphosphate kinase	25.2737	25.2349	25.0941	25.9173	25.932	26.1371	Cluster_1	3	17.2	16.779	0	12.913	10	-1.73459	3.05112
LOC_Os12g32986.1	Q0IN14	osa:4352339	heat shock protein	26.0053	26.1264	25.5226	26.5136	26.8852	27.1709	Cluster_1	5	18.9	91.479	0	30.514	17	-1.96126	1.66874
LOC_Os08g43560.1	Q6ZJJ1	osa:4346247	OsAPx4 - Peroxisomal Ascorbate Peroxidase encoding gene 5	33.102	33.1249	32.8805	33.665	33.8326	33.9166	Cluster_1	20	58.8	31.738	0	204.02	135	-1.70406	2.69527
LOC_Os04g58200.2	Q7XKF3	osa:4337415	Protochlorophyllide reductase A, chloroplastic (PCR A) (EC 1.3.1.33) (NADPH-protochlorophyllide oxidoreductase A) (POR A)	29.4464	29.4604	29.2491	29.8869	30.1164	30.0872	Cluster_1	15	48.5	40.414	0	65.231	67	-1.56358	2.53827
LOC_Os05g25850.1	Q43008	osa:4338417	superoxide dismutase	26.7236	26.8585	26.5164	27.6429	28.1569	28.2455	Cluster_1	5	22.9	24.997	0	13.821	9	-2.48908	2.46029
LOC_Os11g42510.2	Q2R0H9	-	tyrosine aminotransferase	23.4961	24.4546	23.6047	25.3287	26.2876	26.1392	Cluster_1	2	7.4	38.324	0	5.1163	6	-4.18924	2.08293
LOC_Os01g64630.4	A2ZZX3	osa:4325068	actin	28.0085	28.5678	27.7094	29.4429	29.874	29.719	Cluster_1	7	48.4	41.614	0	28.074	30	-2.99678	2.3093
LOC_Os04g59190.1	Q7XSU8	osa:4337484	peroxidase precursor	27.2793	27.4728	27.1581	27.9413	28.069	28.0963	Cluster_1	3	22.9	35.227	0	36.751	20	-1.66107	2.67864
LOC_Os04g36050.1	Q7FA04	osa:4335933	cleft lip and palate transmembrane 1	27.3754	27.38	27.4908	28.0177	28.3244	27.9971	Cluster_1	7	20.8	69.53	0	94.094	27	-1.6219	2.46526
LOC_Os02g11830.2	Q6H8D6	-	Putative coatomer subunit beta'-3 (Beta'-coat protein 3) (Beta'-COP 3)	27.5869	27.7863	27.7782	28.6082	29.0002	28.6043	Cluster_1	7	14.3	102.57	0	61.521	19	-2.02848	2.6501
LOC_Os01g52214.1	Q8W0E8	osa:107276869	ubiquinone oxidoreductase	27.199	27.3476	27.2629	27.8256	28.4556	28.0478	Cluster_1	4	18.1	21.876	0	26.985	12	-1.78987	1.94337
LOC_Os01g57570.1	Q8LQN2	osa:4327039	NADPH-dependent FMN reductase domain containing protein	29.1164	29.0418	29.1119	29.6277	29.907	29.6908	Cluster_1	4	45.8	21.705	0	68.171	48	-1.57115	2.75269
LOC_Os08g02230.1	Q6YXT5	osa:4344509	FAD-binding and arabino-lactone oxidase domains containing protein	28.8803	28.8335	28.9363	29.8172	30.1129	29.9715	Cluster_1	12	29.2	63.601	0	99.949	58	-2.1197	3.55716
LOC_Os05g45950.1	Q6L5I5	osa:4339446	Mitochondrial outer membrane protein porin 2 (Voltage-dependent anion-selective channel protein 2) (OsVDAC2)	32.617	32.8344	32.8519	34.0023	34.5574	34.5574	Cluster_1	12	65.4	29.602	0	269.12	162	-3.04112	2.88388
LOC_Os05g07090.1	Q75IR2	osa:4337904	acyl-coenzyme A dehydrogenase	24.956	24.8485	25.0117	26.5336	27.2658	27.0998	Cluster_1	4	13.5	46.538	0	15.196	10	-4.07748	3.06297
LOC_Os04g58750.4	B9FDE0	-	kinase family protein	27.3962	27.5503	27.5687	28.2842	28.5844	28.5762	Cluster_1	5	20.4	40.252	0	32.77	17	-1.9678	3.0083
LOC_Os02g42320.4	Q6H852	osa:4330075	peptidase	23.8503	24.275	24.4504	26.192	26.916	26.5703	Cluster_1	2	20.5	16.419	0	20.325	5	-5.16058	3.00189
LOC_Os01g12730.1	Q5N7Z9	osa:4327180	ras-related protein	29.8393	29.8588	29.9658	30.6064	30.8043	30.7702	Cluster_1	3	54.6	23.137	0	52.07	54	-1.7888	3.49356
LOC_Os01g70960.1	Q942X6	osa:4326795	cytochrome c1-1	26.2335	26.1655	26.2779	27.2319	27.6448	27.6774	Cluster_1	2	36.2	33.268	0	31.562	9	-2.44932	3.0341
LOC_Os07g35560.2	B9FXQ1	-	glucan endo-1	25.4085	25.4311	25.8469	26.924	28.5112	27.9496	Cluster_1	5	12.5	59.251	0	22.995	10	-4.70036	1.99663
LOC_Os02g11740.1	Q6H8E4	osa:4328685	plastidic ATP/ADP-transporter	28.7348	28.6309	28.7901	29.2006	29.5452	29.4032	Cluster_1	8	12.5	68.119	0	55.196	32	-1.58492	2.41666
LOC_Os06g48750.2	P35683	osa:4341966	DEAD-box ATP-dependent RNA helicase	32.2358	32.1808	32.2901	32.8519	33.2988	33.1747	Cluster_1	4	54.1	47.087	0	281.53	180	-1.83132	2.50846
LOC_Os05g23880.1	Q0DJB6	osa:4338358	lipoxygenase	26.5193	26.8766	26.7907	27.2241	27.499	27.577	Cluster_1	7	12.4	95.342	0	17.861	20	-1.62959	2.012
LOC_Os03g05740.1	Q10RN9	osa:4331646	ras-related protein	26.5164	26.7505	26.7557	27.1426	27.5546	27.4908	Cluster_1	3	23.1	21.648	0	13.194	8	-1.64921	2.06292
LOC_Os02g46962.3	Q6YUH7	osa:4330406	VHS and GAT domain containing protein	25.5126	25.9464	26.1299	27.0118	27.4754	27.4479	Cluster_1	2	15.3	43.606	0	19.092	13	-2.72967	2.44239
LOC_Os03g05310.1	Q10RT5	osa:4331611	pheophorbide a oxygenase	27.7913	28.0583	28.0418	28.8627	29.3568	29.3261	Cluster_1	11	28.1	72.76	0	71.6	45	-2.32634	2.58919
LOC_Os11g41900.1	Q2R0P3	osa:4350987	acyltransferase	26.1998	26.51	26.3458	27.1405	27.3292	27.1857	Cluster_1	2	8.6	42.429	0	22.812	10	-1.82334	2.91203
LOC_Os09g31260.1	Q0J0R1	osa:4347427	expressed protein	26.3899	26.801	26.619	27.347	27.4479	27.4042	Cluster_1	2	24.8	12.661	0	13.736	11	-1.73674	2.53963
LOC_Os08g44680.1	Q84PB4	osa:4346326	Chloroplast photosystem I reaction center subunit II-like protein	34.4964	34.708	34.6484	35.1578	35.2733	35.2733	Cluster_1	11	54.2	22.034	0	143.01	230	-1.53386	2.95134
LOC_Os05g41060.1	Q0DH67	osa:4339157	ADP-ribosylation factor	30.0271	30.2261	30.1945	30.6578	30.8354	30.758	Cluster_1	1	58.6	20.708	0	80.673	54	-1.51697	2.76763
LOC_Os02g39930.1	Q6K623	osa:4329967	OsTIL-1 Temperature-induced lipocalin-1	27.7094	28.337	28.0177	29.6981	30.5946	29.9561	Cluster_1	3	25.1	22.221	0	36.662	19	-4.17457	2.51368
LOC_Os07g08970.1	A0A0P0X317	osa:4342600	uncharacterized ycf45	24.5841	24.6113	24.3219	26.3578	26.2359	25.5296	Cluster_1	5	12.3	75.989	0	14.344	9	-2.89861	2.30178
LOC_Os06g35730.1	Q0DK10	osa:4338077	60S ribosomal protein L11	29.1341	29.1248	28.9749	30.2149	30.123	29.7714	Cluster_1	1	24.7	20.836	0	29.07	20	-1.94327	2.57014
LOC_Os01g55770.1	Q5JMG1	osa:4327033	expressed protein	28.2953	28.3651	28.2953	29.1415	29.1135	28.8164	Cluster_1	5	47.4	15.444	0	16.041	27	-1.63046	2.56784
LOC_Os02g35590.2	Q0GKV1	-	glutathione S-transferase	27.0324	27.014	27.0423	27.7177	27.8004	27.517	Cluster_1	5	25.8	24.86	0	49.641	28	-1.56785	2.80942
LOC_Os11g06390.6	Q67G20	osa:4349863	actin	26.0787	25.9947	26.0629	27.8104	27.7673	27.0961	Cluster_1	1	44.8	41.622	0	16.703	18	-2.85299	2.53918
LOC_Os01g07530.1	Q5VQG4	-	uncharacterized glycosyltransferase	26.3458	26.4102	25.9544	27.7622	28.3594	27.7561	Cluster_1	8	15.7	91.911	0	19.411	20	-3.29981	2.66211
LOC_Os01g19470.1	A2ZS73	osa:4325779	nodal modulator 1 precursor	28	28.0713	27.8962	28.759	29.0233	28.7282	Cluster_1	12	18	130.64	0	81.642	48	-1.79962	2.86857
LOC_Os09g04790.1	Q6K439	osa:4346460	PAP fibrillin family domain containing protein	28.7436	28.8803	28.5644	30.1129	30.2261	29.8664	Cluster_1	8	41.7	33.919	0	152.61	52	-2.52991	3.1738
LOC_Os02g05340.1	Q6Z2Z3	osa:4328287	proteasome/cyclosome repeat containing protein	28.0346	28.1557	27.9923	28.7857	28.8761	28.6581	Cluster_1	3	11.7	98.157	0	74.935	41	-1.63859	3.05643
LOC_Os07g07310.1	Q69LE7	osa:4342497	polynucleotide phosphorylase	25.1218	25.1195	24.9696	26.3148	26.4213	26.0691	Cluster_1	6	9.9	97.399	0	19.089	11	-2.2944	3.30719
LOC_Os12g36640.1	Q2QNV2	-	universal stress domain containing protein	26.4949	27.1688	27.577	30.6454	30.5029	30.5148	Cluster_1	4	47.7	18.415	0	133.97	26	-11.1126	3.39531
LOC_Os03g55070.2	Q9AUV6	osa:4334169	UDP-glucose 6-dehydrogenase	25.8328	26.1514	26.3332	27.5384	27.4935	27.3077	Cluster_1	5	18.8	52.898	0	30.613	14	-2.53281	2.93028
LOC_Os03g27280.1	Q75LR7	osa:4333017	CAMK_CAMK_like.19 - CAMK includes calcium/calmodulin depedent kinases	23.0153	23.5653	24.1454	27.0438	27.1288	27.1166	Cluster_1	3	15.8	38.698	0	14.322	6	-11.4799	3.37308
LOC_Os01g62430.3	Q0JHU5	osa:4327497	C2 domain containing protein	22.8049	23.5608	23.92	25.8256	25.8469	25.8111	Cluster_1	2	15.4	17.436	0	5.1216	5	-5.27524	2.72703
LOC_Os03g18130.4	Q10MX3	osa:4332506	asparagine synthetase	22.7791	23.5704	24.1337	27.9857	28.0292	27.9785	Cluster_1	4	10.4	65.632	0	37.238	9	-22.6812	3.47933
LOC_Os12g08260.7	Q2QWT6	osa:4351684	dehydrogenase E1 component domain containing protein	22.8436	23.4496	23.8959	26.2716	26.5245	26.1582	Cluster_1	3	11.2	38.624	0	13.466	7	-7.57765	3.07908
LOC_Os11g41130.1	Q2R0X0	osa:4350961	vacuolar sorting-associated 26	26.0879	26.2635	26.5267	27.1532	27.4016	27.2241	Cluster_1	3	20.1	35.33	0	16.265	21	-1.95469	2.55422
LOC_Os01g71670.1	Q94CR1	-	glycosyl hydrolases family 17	25.6876	25.9928	26.4102	28.2125	28.3759	28.2953	Cluster_1	8	34.7	35.682	0	68.153	22	-4.80438	3.33991
LOC_Os06g38550.1	Q5VP89	osa:4341393	expressed protein	26.5819	26.7592	26.9725	27.9687	27.9923	28.1078	Cluster_1	6	12.8	74.223	0	57.423	23	-2.38132	3.31009
LOC_Os12g43550.2	Q0ILQ6	osa:4352862	ras-related protein	25.616	25.6195	25.7752	26.5851	26.4458	26.3482	Cluster_1	2	27.1	22.146	0	9.498	11	-1.72842	3.09725
LOC_Os10g42299.3	A3C7K0	osa:4349476	mitochondrial carrier protein	26.5293	26.6328	26.745	27.5613	27.4827	27.3646	Cluster_1	7	37.5	30.42	0	26.918	19	-1.78239	3.22741
LOC_Os05g29990.1	Q6I683	osa:4338546	NAD dependent epimerase/dehydratase family domain containing protein	28.0308	28.1918	28.2373	29.1857	29.0483	29.0079	Cluster_1	3	29.1	48.708	0	103.44	37	-1.9018	3.44612
LOC_Os02g04480.1	Q6YXY3	osa:4328237	Putative splicing factor 3b, subunit 3	26.4248	26.5726	26.6775	27.3962	27.2002	27.2405	Cluster_1	8	13.4	94.281	0	56.011	27	-1.64798	2.79803
LOC_Os03g02390.1	Q8GZW5	osa:4331390	Mitochondrial import inner membrane translocase subunit Tim17 family protein	23.4211	23.8366	24.1584	26.662	26.2954	26.185	Cluster_1	2	27.8	20.406	0	5.3324	9	-5.96049	3.25024
LOC_Os04g57540.1	Q7XR47	osa:4337358	adenylate kinase	22.6881	23.0629	23.5073	25.3535	24.9233	25.3371	Cluster_1	2	8.4	31.062	0	4.7598	4	-4.34244	2.8133
LOC_Os10g34030.1	Q7XDA5	-	zinc finger	26.1621	26.3332	26.4868	27.4628	27.1768	27.38	Cluster_1	2	10.4	37.351	0	54.946	15	-2.01744	2.87856
LOC_Os05g01450.1	Q75M19	osa:4337552	eukaryotic translation initiation factor 3 subunit F	28.2394	28.1928	28.5272	29.2065	28.9947	29.0418	Cluster_1	7	36.3	31.238	0	84.539	27	-1.69489	2.46402
LOC_Os01g16900.2	Q9SDG5	osa:4324442	Isocitrate dehydrogenase [NAD] subunit, mitochondrial	27.995	28.0292	28.3824	29.0002	28.8384	28.8673	Cluster_1	5	18.8	39.442	0	32.076	24	-1.70105	2.34127
LOC_Os03g64110.1	Q84M69	osa:4334851	WD domain	22.7584	22.4689	23.6401	25.201	24.8886	24.9853	Cluster_1	2	5.6	47.251	0	18.436	10	-4.19638	2.3248
LOC_Os03g21720.1	Q10LT8	osa:4332756	vacuolar-sorting receptor precursor	27.5746	27.5384	27.7357	28.2802	28.1291	28.2222	Cluster_1	6	13.4	69.982	0	22.586	27	-1.50971	2.86367
LOC_Os08g14230.1	Q0J716	osa:4345036	villin	25.4663	25.4102	25.6444	26.2635	26.1433	26.2321	Cluster_1	3	7.3	72.23	0	8.1563	8	-1.63126	3.05647
LOC_Os08g38410.3	Q6Z8U4	osa:4345910	RNA recognition motif containing protein	23.4068	23.0303	23.6988	24.9398	24.6169	24.7189	Cluster_1	2	8	38.125	0.0011531	2.5344	3	-2.60252	2.5135
LOC_Os01g46070.1	Q94JA2	osa:4326249	lactate/malate dehydrogenase	23.6445	23.2456	24.0073	26.0952	25.768	25.809	Cluster_1	2	27.6	35.46	0	11.857	7	-4.78412	3.12821
LOC_Os03g29190.2	Q7Y0E8	osa:4333075	PDI	26.1392	25.9117	26.3985	27.4047	27.2384	27.1426	Cluster_1	4	12.7	63.288	0	30.809	20	-2.16166	2.64664
LOC_Os10g35960.1	Q337E9	osa:4349051	NAD-dependent malic enzyme	24.0458	23.7915	24.4785	25.6613	25.5426	25.7727	Cluster_1	5	11.8	68.279	0	7.7397	11	-2.93547	2.7396
LOC_Os02g32160.1	Q6H563	osa:4329499	copine	26.5315	26.4314	26.7175	27.1652	27.1604	27.2542	Cluster_1	6	16.6	63.83	0	41.362	18	-1.55095	2.68149
LOC_Os05g25640.1	Q5W6F1	osa:4338409	cytochrome P450	28.8673	28.7436	29.0764	29.4464	29.5331	29.5459	Cluster_1	15	34.2	56.883	0	89.381	60	-1.52913	2.41215
LOC_Os08g10310.2	Q6ZKW7	osa:4344914	SHR5-receptor-like kinase	23.7297	23.5284	24.5024	26.3332	26.5315	26.5336	Cluster_1	1	3.2	92.633	0	7.5749	6	-5.83976	2.95278
LOC_Os01g54910.1	Q5JMX4	osa:4327008	GTP-binding typA/bipA	22.8231	22.7584	23.4127	24.8439	24.7858	24.9725	Cluster_1	2	4.6	72.795	0	4.2919	3	-3.65365	3.01368
LOC_Os04g28180.1	Q0JDZ7	osa:4335547	ribosomal protein	28.4069	28.3732	28.6166	29.1946	29.1857	29.2491	Cluster_1	1	31.7	24.928	0	90.207	23	-1.6751	3.15684
LOC_Os04g57850.1	Q7XQ93	osa:4337383	AMP-binding enzyme	22.7933	22.8919	23.6489	25.5296	25.4729	25.5226	Cluster_1	4	10	60.422	0	16.969	6	-5.26713	3.04564
LOC_Os03g42320.1	Q851W1	osa:4333468	Sec1 family transport protein	23.3778	23.3286	24.0942	25.6876	25.5154	25.6313	Cluster_1	4	9.1	67.816	0	8.3816	11	-4.03132	2.87066
LOC_Os01g24710.4	B7E7K3	osa:4326471	jacalin-like lectin domain containing protein	23.6047	23.429	24.7971	28.6612	28.6731	28.5547	Cluster_1	2	27	14.329	0	7.3793	10	-25.7422	3.38967
LOC_Os03g19890.1	Q10MD5	osa:4332639	ETC complex I subunit conserved region family protein, expressed (Os03g0313000 protein)	28.8874	28.9054	29.2065	29.874	29.9826	29.907	Cluster_1	8	49.1	19.513	0	63.659	39	-1.89401	2.97904
LOC_Os11g39220.1	Q2R1G8	osa:4350881	Acyl-coenzyme A oxidase	25.8752	25.5226	26.3866	28.5943	28.4677	28.4822	Cluster_1	9	18	77.214	0	63.511	28	-6.00674	3.28102
LOC_Os08g26710.1	Q6Z5Z5	osa:4345356	plant of unknown function domain containing protein	23.7679	23.444	24.3726	26.3716	26.3531	26.3927	Cluster_1	3	9.3	56.834	0	11.646	11	-5.69985	3.11394
LOC_Os03g14654.1	Q0DTF5	-	LTPL108 - Protease inhibitor/seed storage/LTP family precursor	27.9536	27.637	28.1374	29.1135	29.3149	29.1248	Cluster_1	3	14.6	15.662	0	4.1071	7	-2.42014	2.87113
LOC_Os02g51750.1	Q6Z6A7	osa:4330759	annexin	23.7868	23.3116	24.1969	25.9044	25.7788	25.8851	Cluster_1	2	8.6	35.554	0	12.226	4	-4.26035	2.89483
LOC_Os02g04840.1	Q6YX79	osa:4328266	GHMP kinases ATP-binding protein	23.8628	23.3008	24.5798	27.6742	27.7954	27.7062	Cluster_1	7	8.6	109.51	0	14.487	14	-14.0334	3.29139
LOC_Os01g42850.2	Q5ZDX5	osa:4326644	ThiF family domain containing protein	23.7048	23.1524	23.9712	26.3015	26.3911	26.3246	Cluster_1	8	9.8	113.58	0	18.408	16	-6.63261	3.44907
LOC_Os02g02410.1	Q6Z7B0	osa:4328075	DnaK family protein	29.644	29.5528	29.8101	30.3521	30.3709	30.3709	Cluster_1	14	30.1	73.389	0	151.47	73	-1.61966	3.1116
LOC_Os05g39390.1	Q6ATX4	osa:4339073	outer membrane protein	27.6586	27.5707	27.7449	28.4183	28.4302	28.4348	Cluster_1	7	14.6	56.368	0	30.971	29	-1.70493	3.96602
LOC_Os01g52500.3	B9EZH0	-	NADP-dependent malic enzyme	23.4837	23.1643	24.0961	27.3857	27.4408	27.2014	Cluster_1	5	13.5	65.396	0	18.458	23	-13.56	3.73332
LOC_Os02g57640.1	Q6K6Z4	osa:4331186	KH domain containing protein	23.8074	23.6	24.1934	26.4143	26.5017	26.3634	Cluster_1	4	15.7	36.718	0	28.961	9	-5.89506	3.86183
LOC_Os07g36465.1	C7J582	-	vacuolar ATP synthase subunit H	28.1597	28.4317	28.4209	29.2964	29.2964	29.4946	Cluster_1	6	62.2	12.82	0	107.59	29	-2.03498	3.1203
LOC_Os02g54820.2	A3AC56	osa:4330971	trehalose-6-phosphate synthase	25.998	26.3695	26.3678	27.5068	27.5384	27.705	Cluster_1	8	13.9	93.882	0	29.192	20	-2.52848	3.19875
LOC_Os06g50300.1	Q5Z9N8	osa:4342077	heat shock protein	29.9826	30.1945	30.2757	30.9204	30.9832	31.1542	Cluster_1	24	35.1	93.044	0	199.27	94	-1.82554	2.82866
LOC_Os01g42010.1	Q5ZDA3	osa:4324102	expressed protein	24.9398	25.0598	25.0769	25.8298	25.7262	26.0837	Cluster_1	3	14.7	39.915	0	21.211	10	-1.80799	2.76134
LOC_Os03g29950.2	Q75IZ9	osa:4333103	glucose-6-phosphate 1-dehydrogenase	26.356	26.5005	26.5426	27.162	27.1909	27.4656	Cluster_1	5	19.3	51.331	0	19.162	12	-1.74894	2.70475
LOC_Os12g35290.1	Q2QP91	osa:4352423	conserved oligomeric Golgi complex component 8	23.5446	23.6352	23.6811	25.0434	24.9582	25.4125	Cluster_1	3	5.6	66.709	0	8.7722	6	-2.86337	3.32597
LOC_Os03g10620.3	Q10QA5	osa:4331983	hydrolase	24.4785	24.468	24.6807	25.4439	25.6009	25.8022	Cluster_1	3	9.4	33.508	0	5.5295	10	-2.10425	2.99966
LOC_Os11g24560.1	Q53NR8	osa:4350403	Protein transport protein SEC23	26.6674	26.6754	26.7926	27.4047	27.3789	27.5959	Cluster_1	7	15.8	86.681	0	58.429	23	-1.67951	3.14809
LOC_Os10g35870.1	Q9FVZ7	osa:4349046	cytochrome b5-like Heme/Steroid binding domain containing protein	29.2596	29.3003	29.4219	30.2982	30.2489	30.4201	Cluster_1	6	49.6	24.634	0	78.468	36	-1.99327	3.83605
LOC_Os07g34640.2	Q8GVP6	osa:4343450	pyruvate Pi dikinase regulatory protein	25.0631	25.2416	25.3091	26.3649	26.0474	26.3649	Cluster_1	4	13.3	47.838	0	9.8507	13	-2.07699	2.91647
LOC_Os01g19450.2	Q93VT8	osa:4325777	ATP-citrate synthase subunit 1	26.6531	26.7784	26.7669	27.5588	27.3754	27.6429	Cluster_1	5	15.4	60.326	0	22.446	27	-1.73257	3.06583
LOC_Os01g01450.2	Q9FTY4	osa:4326294	stress responsive protein	28.6029	28.7653	28.6856	30.5148	30.2231	30.6578	Cluster_1	5	35.8	30.146	0	95.05	47	-3.43573	3.70376
LOC_Os01g09560.1	Q5SNJ4	osa:4327300	mitochondrial-processing peptidase subunit alpha	31.3314	31.3838	31.3314	32.0483	31.7474	32.0483	Cluster_1	17	54.1	53.946	0	236.53	139	-1.51481	2.37993
LOC_Os12g07670.1	Q2QWZ9	osa:4351648	Transmembrane 9 superfamily member	23.4894	23.9712	23.2366	25.3387	25.3197	25.606	Cluster_1	3	7.4	68.072	0	9.8914	6	-3.61947	2.86049
LOC_Os10g39670.1	Q336V9	osa:9270011	kinase family protein	27.6255	27.8023	27.5677	28.337	28.3769	28.4069	Cluster_1	5	20.5	58.177	0	25.036	35	-1.63399	3.19052
LOC_Os07g43890.1	Q7XI54	osa:4344005	emp24/gp25L/p24 family protein	26.2779	26.6061	26.2016	27.4315	27.2412	27.4562	Cluster_1	2	13	25.853	0	13.892	10	-2.02014	2.69876
LOC_Os06g40650.4	Q69V55	-	copine-1	23.5811	24.9644	23.4794	26.9193	26.8869	27.3754	Cluster_1	4	11.1	46.247	0	23.462	8	-8.29462	2.42487
LOC_Os03g50325.1	Q53RI7	-	phosphatidylinositol 4-kinase	23.435	24.0211	23.2905	24.9217	24.956	25.058	Cluster_1	2	4.6	89.723	0	4.7795	3	-2.63237	2.44986
LOC_Os01g32870.2	Q5QMV0	osa:4324035	heat shock DnaJ	24.395	24.7588	24.3184	25.5595	25.3774	25.568	Cluster_1	3	12.9	44.959	0	4.5522	5	-2.01522	2.60402
LOC_Os02g08380.1	Q6ETK1	osa:4328507	CR084 protein	28.2455	28.5762	28.2222	29.0233	28.9432	29.1415	Cluster_1	7	40.5	20.154	0	39.681	52	-1.61105	2.23741
LOC_Os05g48340.1	Q6I605	osa:4339575	proteasome-related	25.5645	25.8022	25.5296	26.5557	26.5465	26.7118	Cluster_1	3	7.8	57.468	0	10.078	11	-1.96233	3.1858
LOC_Os01g11414.2	Q5QNI2	osa:4325568	Sodium/calcium exchanger NCL1 (Na(+)/Ca(2+)-exchange protein NCL1) (OsEFCAX1) (Protein NCX-like 1) (OsNCL1)	27.1229	27.4506	27.2227	28.0418	28.0177	28.1569	Cluster_1	4	10.8	47.283	0	26.38	11	-1.74931	2.79519
LOC_Os01g68324.2	Q5N7W3	osa:4324876	Dolichyl-diphosphooligosaccharide--protein glycosyltransferase subunit 2 (Ribophorin II) (RPN-II) (Ribophorin-2)	29.7521	29.8797	29.7794	30.4201	30.3521	30.5272	Cluster_1	18	33	75.206	0	70.195	76	-1.54694	3.22136
LOC_Os05g33380.1	P17784	osa:4338737	fructose-bisphospate aldolase isozyme	26.2448	26.7044	26.5092	28.0265	27.8651	27.6112	Cluster_1	3	22.6	38.863	0	13.288	16	-2.54582	2.77071
LOC_Os04g57890.1	Q7XQ88	osa:4337389	Dolichyl-diphosphooligosaccharide--protein glycosyltransferase subunit STT3B (Oligosaccharyl transferase subunit STT3B) (STT3-B) (EC 2.4.99.18) (Protein STAUROSPORIN AND TEMPERATURE SENSITIVE 3-LIKE B)	26.3246	26.5819	26.4541	27.2712	27.1888	27.0718	Cluster_1	3	5.1	80.731	0	51.892	11	-1.65142	2.81236
LOC_Os03g04460.1	Q10S27	osa:4331551	outer mitochondrial membrane porin	27.3239	27.5413	27.4854	28.4069	28.3674	28.0822	Cluster_1	8	41.7	29.683	0	35.717	23	-1.78422	2.63284
LOC_Os02g58020.3	Q6K7R4	-	ABC transporter	26.2944	26.5336	26.4501	27.3155	27.1437	27.1077	Cluster_1	4	7.9	64.787	0	27.812	9	-1.69693	2.8843
LOC_Os01g46510.2	Q5VPC8	osa:4324171	peptidase S8 and S53	27.0674	27.2542	27.1532	27.8596	27.841	27.7527	Cluster_1	10	10.9	144.96	0	34.739	25	-1.57952	3.32066
LOC_Os01g74010.2	Q5JME4	osa:4323848	cyclase/dehydrase family protein	26.0349	26.2514	26.2081	27.2499	27.206	26.9659	Cluster_1	4	15.5	29.709	0	8.9593	15	-1.9668	3.04533
LOC_Os08g44480.1	Q6YZI2	osa:4346314	40S ribosomal S25	27.6188	27.923	27.6541	28.4592	28.4647	28.3941	Cluster_1	3	29.6	12.068	0	23.241	11	-1.63287	2.69752
LOC_Os08g03570.1	Q8H0B2	osa:4344584	NAD dependent epimerase/dehydratase family protein	25.0434	25.4239	25.1079	26.1689	25.9756	25.8661	Cluster_1	2	9.1	44.827	0	14.934	13	-1.75542	2.27805
LOC_Os06g46740.1	Q653Y0	osa:4341858	early nodulin 20 precursor	23.5704	24.2337	23.6552	26.2176	25.8783	25.8528	Cluster_1	2	10.8	27.35	0	13.847	7	-4.47881	3.08109
LOC_Os04g38640.2	B7EBF9	osa:9268615	OsDegp5 - Putative Deg protease homologue	27.1757	27.4178	27.2241	28.221	28.221	28.1232	Cluster_1	6	22.6	40.821	0	27.993	23	-1.88671	3.46123
LOC_Os02g39550.3	Q6K1Y0	osa:4329936	calcium-binding mitochondrial anon-60Da	25.9105	26.2176	25.8392	27.1909	27.2227	27.0668	Cluster_1	8	13.6	84.05	0	24.301	20	-2.25171	3.1347
LOC_Os02g55880.1	Q69II5	osa:4331043	EF hand family protein	23.3008	24.0242	23.2193	25.7901	25.7087	25.5724	Cluster_1	3	23.4	20.205	0	21.211	9	-4.51778	2.93
LOC_Os12g39420.11	Q2QN04	osa:4352654	nucleobase-ascorbate transporter	22.9704	24.1008	23.2582	26.9417	26.7182	27.0276	Cluster_1	3	7.1	53.461	0	17.913	7	-10.9483	3.22025
LOC_Os08g22864.1	Q69PQ1	-	sec8 exocyst complex component specific domain containing protein	26.2055	26.4884	26.3386	27.3694	27.2336	27.2925	Cluster_1	9	10.5	117.4	0	26.52	23	-1.93768	3.33631
LOC_Os08g04180.1	Q6YYB9	osa:4344612	tryptophan synthase beta chain 1	26.8927	27.2978	27.0692	28.279	28.0641	28.1623	Cluster_1	7	16.6	49.999	0	25.716	22	-2.11685	2.90965
LOC_Os04g20230.1	Q7XWV6	osa:4335339	neighbor of COX4	26.3312	26.6206	26.4396	27.0858	27.064	27.1189	Cluster_1	5	21.5	22.723	0	10.825	20	-1.54302	2.72372
LOC_Os03g07480.4	Q10R54	osa:4331775	Sucrose transport protein SUT1 (Sucrose permease 1) (Sucrose transporter 1) (OsSUT1) (Sucrose-proton symporter 1)	22.9167	23.6401	23.0995	24.8829	24.6233	24.9094	Cluster_1	4	16.6	47.668	0	6.5318	4	-3.00311	2.59632
LOC_Os02g54254.2	E3WF37	osa:4330940	saccharopine dehydrogenase	23.995	25.5296	24.8485	29.5206	28.8998	29.1946	Cluster_1	18	18.8	114.4	0	46.421	42	-21.3177	3.11395
LOC_Os01g24950.2	Q8S213	osa:4326480	exocyst complex component 6	27.3723	27.5746	27.4053	28.2415	28.178	28.2162	Cluster_1	10	18.9	87.655	0	61.536	37	-1.69481	3.50826
LOC_Os02g01450.1	Q6YPG4	osa:4328007	expressed protein	27.1909	27.4133	27.3031	28.0393	27.9857	28.0324	Cluster_1	4	18.6	29.613	0	20.383	19	-1.64342	3.37993
LOC_Os05g51530.2	Q6L4R5	osa:4339800	V-type proton ATPase subunit C	29.3511	29.7267	29.5593	30.9916	30.7171	30.9271	Cluster_1	10	38.5	42.678	0	62.531	49	-2.51909	3.20875
LOC_Os11g42490.1	Q2R0I2	osa:4351015	retrotransposon protein	22.174	23.8628	23.7536	27.5968	27.6415	27.7584	Cluster_1	5	14.2	58.339	0	10.156	8	-21.1424	2.88562
LOC_Os09g39960.1	Q650Z3	osa:4347929	dynamin family protein	23.1524	24.4104	24.2433	26.8383	26.6035	26.9725	Cluster_1	5	16.5	69.501	0	9.9471	9	-7.30766	2.66315
LOC_Os03g60460.1	Q84TA3	osa:4334583	aminopeptidase	26.5146	26.8619	26.8163	27.577	27.5003	27.5459	Cluster_1	7	14.1	67.791	0	14.736	21	-1.75339	2.72429
LOC_Os02g47650.1	Q6Z2G8	-	universal stress domain containing protein	22.9248	24.5228	24.8397	28.4302	28.5343	28.445	Cluster_1	6	37.5	20.448	0	22.13	18	-20.7363	2.74326
LOC_Os01g54940.1	Q5JMM6	osa:4327011	dehydrogenase	26.321	26.8143	26.7614	28.445	28.3896	28.3573	Cluster_1	8	27.1	38.814	0	27.981	22	-3.39893	3.4325
LOC_Os02g10480.6	Q6H738	osa:4328629	stromal membrane-associated protein	22.8919	23.6988	23.7048	26.7301	26.5874	26.5755	Cluster_1	4	16.2	35.25	0	12.159	10	-9.18398	3.50875
LOC_Os09g16330.2	A3BXL8	osa:9269190	pleiotropic drug resistance protein	26.5776	26.8613	26.9236	28.3344	28.2953	28.342	Cluster_1	7	7.3	162.73	0	33.644	34	-2.90073	3.85695
LOC_Os08g34720.1	Q6ZAA5	osa:4345710	D-3-phosphoglycerate dehydrogenase	26.5071	26.6915	26.6401	27.3399	27.477	27.4578	Cluster_1	5	14.7	64.558	0	32.737	18	-1.75568	3.50874
LOC_Os06g04530.1	Q5VQ13	osa:4340044	OsClp9 - Putative Clp protease homologue	24.8228	25.2757	25.2757	27.5503	27.5707	27.5476	Cluster_1	3	13.5	32.224	0	53.731	12	-5.39444	4.05918
LOC_Os03g19290.1	Q10MK4	osa:4332597	Mitochondrial import inner membrane translocase subunit Tim17/Tim22/Tim23 family protein	23.7172	24.5649	24.3604	27.5802	27.7232	27.3948	Cluster_1	4	34.6	18.37	0	26.649	11	-10.2101	3.60044
LOC_Os03g62180.3	Q851M7	osa:4334716	lectin kinase family protein	25.1749	25.4005	25.3752	26.0837	26.1879	26.1556	Cluster_1	4	4.8	91.771	0	15.477	9	-1.77223	3.35217
LOC_Os11g33394.2	Q0ISB3	osa:4350668	plant of unknown function domain containing protein	27.026	27.2336	27.1604	27.9639	27.9639	28.0265	Cluster_1	7	28.2	50.599	0	27.615	28	-1.79598	3.71293
LOC_Os11g33120.1	Q2R351	osa:107278041	Respiratory burst oxidase protein D	25.4027	25.7831	25.6518	27.3589	27.2029	27.2319	Cluster_1	5	11	105.18	0	30.179	18	-3.14277	3.77265
LOC_Os08g39850.4	A7UMR2	-	lipoxygenase	23.695	24.1245	24.0123	26.4752	26.356	26.408	Cluster_1	3	9.1	92.381	0	12.839	9	-5.537	4.30275
LOC_Os07g10420.2	Q7XB67	osa:4342676	expressed protein;LOC_Os07g10420.1 LOC_Os07g10420.1	23.0882	23.7333	23.4068	26.2731	26.1689	26.3386	Cluster_1	2	12.1	23.89	0	4.5983	4	-7.21392	3.91538
LOC_Os05g06430.2	A0A067Y3P4	osa:4337858	Protein disulfide-isomerase (EC 5.3.4.1)	26.7784	27.1254	26.9509	28.6675	28.4628	28.5537	Cluster_1	4	23.8	39.912	0	18.889	17	-3.05212	3.80076
LOC_Os02g12680.1	Q6Z6L1	osa:4328742	cytochrome P450	23.2039	24.3479	24.275	29.9052	29.787	29.9089	Cluster_1	11	32.2	54.438	0	61.842	40	-60.7503	4.04198
LOC_Os01g39000.2	A2ZUJ9	osa:4326349	ZmGR2c	26.4034	26.5438	26.4654	27.2942	27.1935	27.2227	Cluster_1	3	13.6	28.642	0	7.2801	12	-1.70047	3.95855
LOC_Os02g03740.1	Q6Z6Y1	osa:4328188	pyridoxal biosynthesis PDX2	25.7643	26.0474	25.9405	27.0163	26.9961	27.0029	Cluster_1	3	20.8	27.49	0	27.037	13	-2.1253	3.71354
LOC_Os05g01820.1	I3QD60	osa:4337583	cytochrome b5-like Heme/Steroid binding domain containing protein	30.3067	30.0872	30.241	31.109	31.2243	30.9397	Cluster_1	4	45.3	15.282	0	118.28	66	-1.83964	2.95109
LOC_Os03g52310.1	Q6AVI0	osa:4334009	transposon protein	29.7361	29.5452	29.6532	30.2829	30.3461	30.2641	Cluster_1	6	31.4	80.975	0	170.96	77	-1.57233	3.37648
LOC_Os08g44270.1	Q6ZJ18	osa:4346292	vignain precursor	24.4149	23.4776	23.8334	26.8086	27.162	26.7145	Cluster_1	2	9.4	41.871	0	10.206	6	-7.9249	3.21335
LOC_Os09g03620.1	Q6K270	osa:4346430	wall-associated receptor kinase-like 20 precursor	27.3292	27.1471	27.1207	28.3106	28.4317	28.2356	Cluster_1	7	17.9	59.067	0	36.589	29	-2.18399	3.68972
LOC_Os06g04460.1	Q5VNU2	osa:4340038	hypersensitive-induced response protein	25.809	25.6134	25.55	27.366	27.2472	26.9459	Cluster_1	4	16.3	32.14	0	11.374	10	-2.88563	3.31271
LOC_Os03g15900.2	Q10NL9	-	SH3 domain containing protein	27.0381	26.9621	26.9747	27.7782	27.8284	27.6558	Cluster_1	11	13	113.38	0	56.024	33	-1.6964	3.76201
LOC_Os03g56810.1	P37832	osa:4334309	Tubulin beta-7 chain (Beta-7-tubulin) (pTUB22)	24.938	24.147	24.2262	27.6558	27.7009	27.1277	Cluster_1	2	43.2	49.822	0	34.964	6	-8.32692	3.21834
LOC_Os10g10500.1	Q33AF5	osa:4348218	V-type proton ATPase subunit a	29.6723	29.6147	29.5889	30.6179	30.4666	30.5075	Cluster_1	12	28.1	92.738	0	118.24	86	-1.873	4.21241
LOC_Os06g08720.2	Q5SMV5	osa:4340344	OsSCP32 - Putative Serine Carboxypeptidase homologue	24.9828	24.8871	24.9783	26.1655	25.962	26.0008	Cluster_1	3	7.6	53.393	0	24.75	12	-2.13377	4.01452
LOC_Os06g02370.1	Q9LWT7	osa:9267527	expressed protein;LOC_Os06g02370.3 LOC_Os06g02370.3	27.4408	27.366	27.3589	28.8512	28.5457	28.504	Cluster_1	4	6.2	62.787	0	18.906	24	-2.37034	3.42078
LOC_Os05g41640.2	A0A0P0WP33	osa:4339204	phosphoglycerate kinase protein	34.7864	34.7378	34.7378	36.1629	36.025	36.025	Cluster_1	25	54.3	50.137	0	323.31	331	-2.49141	4.95232
LOC_Os01g13210.2	Q0JPA6	osa:4324284	salt stress root RS1	32.8344	32.8172	32.743	34.2642	33.985	34.0704	Cluster_1	8	54.9	21.801	0	189.3	69	-2.47654	3.93892
LOC_Os01g21160.2	Q655Q2	osa:4327289	2-oxo acid dehydrogenases acyltransferase domain containing protein	26.3605	26.3911	26.356	28.0222	27.7742	27.8596	Cluster_1	6	29.8	49.636	0	25.214	21	-2.86016	4.48488
LOC_Os12g39660.1	Q2QMX9	osa:4352664	Calcium-transporting ATPase 10, plasma membrane-type (OsACA10) (EC 7.2.2.10) (Ca(2+)-ATPase isoform 10)	26.6061	26.6674	26.5943	27.4003	27.2588	27.3213	Cluster_1	7	8.4	111.15	0	31.415	27	-1.62924	3.94421
LOC_Os08g09200.1	B9FZG0	-	aconitate hydratase protein	27.4271	27.4606	27.3992	28.1807	28.0113	28.0177	Cluster_1	10	16.8	107.62	0	22.589	31	-1.55932	3.413
LOC_Os03g08050.1	Q10QZ6	osa:4331810	elongation factor Tu	33.985	33.985	33.8781	35.0188	34.708	34.8392	Cluster_1	14	42.7	49.292	0	192.18	195	-1.87384	3.13754
LOC_Os06g10760.1	Q69TX8	osa:4340456	emp24/gp25L/p24 family protein	25.8528	26.0042	25.8328	26.7592	26.5184	26.5524	Cluster_1	3	10.5	22.874	0	4.7413	6	-1.63969	2.8149
LOC_Os09g37100.1	Q0IZX5	-	phospholipase D	27.7933	27.6774	27.7751	28.6016	28.6581	28.8551	Cluster_1	9	16.9	96.459	0	43.018	30	-1.94032	3.45206
LOC_Os07g38390.1	Q0D5A7	osa:4343668	chalcone isomerase	25.6884	25.6444	25.612	26.4314	26.4396	26.5621	Cluster_1	5	21.7	28.522	0	13.244	15	-1.777	4.19227
LOC_Os01g53930.1	Q8LQ68	osa:4326547	Hexokinase-6 (EC 2.7.1.1) (Hexokinase-2)	31.024	30.9271	30.9397	31.6697	31.6182	31.773	Cluster_1	14	44.9	55.12	0	244.21	106	-1.651	3.72169
LOC_Os02g09150.1	Q6H883	osa:4328526	H(+)-exporting diphosphatase (EC 7.1.3.1)	28.3594	28.2599	28.0494	29.6723	29.8588	30.3067	Cluster_1	3	19	80.178	0	11.688	13	-3.30128	2.92604
LOC_Os08g18110.1	Q6YS11	osa:4345167	alpha-soluble NSF attachment protein	28.8512	28.7131	28.759	29.7361	29.5744	29.7794	Cluster_1	8	36.3	32.485	0	54.098	45	-1.89493	3.61266
LOC_Os07g49330.1	Q6Z3Y9	osa:4344391	phospholipase C	30.7471	30.7285	30.7285	31.6444	31.4992	31.6182	Cluster_1	20	42.8	67.782	0	255.63	129	-1.80569	4.33645
LOC_Os03g08624.1	Q94HG6	osa:9269735	dihydroflavonol-4-reductase	24.2357	24.1502	24.1112	25.7466	25.4923	25.6639	Cluster_1	2	6.5	36.876	0	10.826	5	-2.76746	4.21333
LOC_Os03g03720.1	Q9SNK3	osa:4331495	glyceraldehyde-3-phosphate dehydrogenase	33.745	33.7134	33.7134	34.3488	34.2642	34.3222	Cluster_1	12	37.6	47.11	0	277.97	148	-1.50293	4.57263
LOC_Os01g40570.1	Q7F4F8	osa:4327665	Mitochondrial outer membrane protein porin 3 (Voltage-dependent anion-selective channel protein 3) (OsVDAC3)	29.269	29.1946	29.0933	30.3385	30.1416	30.2757	Cluster_1	7	41.8	29.891	0	38.203	45	-2.09398	3.79688
[truncated: 906 more rows]

## Sheet: Table S3
Table S3. GO enrichment analysis of differentially modulated proteins by comparison between two different microsomal protein extraction methods
[truncated: 583 more rows]

[truncated: 6 more sheets: Table S4, Table S5, Table S6, Table S7, Table S8, Table S9]
